# Supplementary material for: An integration test based only on the maximum and minimum Z-scores for meta analysis
Source: Research Square preprint supplement (doi:10.21203/rs.3.rs-3931249/v1), 2024-02-13
Supplement: Supplementary file 1 [file ed8b049421da47c2d99334ad.pdf]

# Supporting material to "An integration test based only on the maximum and minimum Z-scores for meta analysis"

Yuxin Zhang<sup>1,2\*</sup> and Zhengbang Li<sup>2,3†</sup>

<sup>1\*</sup>School of Mathematics and Statistics, Central China Normal University, No. 152 Luoyu Road, 430000, Wuhan, China.

<sup>2</sup>School of Mathematics and Statistics, Central China Normal University, No. 152 Luoyu Road, 430000, Wuhan, China.

\*Corresponding author(s). E-mail(s): [a1443196130@163.com](mailto:a1443196130@163.com);

Contributing authors: [lizhengbang@mail.ccnu.edu.cn](mailto:lizhengbang@mail.ccnu.edu.cn);

†These authors contributed equally to this work.

## Abstract

In this supporting material, we provide some technical lemmas and detailed proofs for all lemmas and theorems.

**Keywords:** Z-score value, Maximum value, Minimum value, Asymptotic distribution

## 1 TECHNICAL LEMMAS AND THEIR PROOFS

Denotes  $c_p = 2\log(p) - [\log(\log p) + \log(4\pi)] + \frac{\log(\log p) + \log(4\pi)}{2\log(p)}$ . Let  $X_1, \dots, X_p$  independently follow a common standard normal distribution. We can obtain that,  
(i) For any real number  $x$  and  $y$ ,

$$\lim_{p \rightarrow +\infty} P_r \left\{ \frac{\left[ \max_{s=1, \dots, p} (X_s) \right]^2 - c_p}{2 - (\log p)^{-1}} < x \right\} = \exp\{-\exp(-x)\}$$

and

$$\lim_{p \rightarrow +\infty} P_r \left\{ \frac{\left[ \min_{s=1, \dots, p} (X_s) \right]^2 - c_p}{2 - (\log p)^{-1}} < y \right\} = \exp\{-\exp(-y)\}$$

(ii) For any real number  $x$  and  $y$ ,  $\left[ \max_{s=1, \dots, p} (X_s) \right]^2$  and  $\left[ \min_{s=1, \dots, p} (X_s) \right]^2$  are asymptotically independent, namely,

$$\begin{aligned} & \lim_{p \rightarrow +\infty} P_r \left\{ \frac{\left[ \max_{s=1, \dots, p} (X_s) \right]^2 - c_p}{2 - (\log p)^{-1}} < x, \frac{\left[ \min_{s=1, \dots, p} (X_s) \right]^2 - c_p}{2 - (\log p)^{-1}} < y \right\} \\ &= G(x)G(y) \end{aligned}$$

where distribution function  $G(x) = \exp\{-\exp(-x)\}$  and  $G(y) = \exp\{-\exp(-y)\}$ .

*Proof.* Please refer to literature [1].  $\square$

If  $\xi_n$  is an i.i.d.(standard) normal sequence of r.v.'s, then the asymptotic distribution of  $M_n = \max(\xi_1, \xi_2, \dots, \xi_n)$  is of Type I. Specifically,

$$P\{a_n(M_n - b_n) \leq x\} \rightarrow \exp(-e^{-x}),$$

where

$$a_n = (2 \log n)^{1/2}$$

and

$$b_n = (2 \log n)^{1/2} - \frac{1}{2}(2 \log n)^{-1/2}(\log \log n + \log 4\pi)$$

*Proof.* Please refer to Theorem 1.5.3 in literature [2].  $\square$

Writing  $m_n = \min(\xi_1, \xi_2, \dots, \xi_n)$ , clearly  $m_n = -\max(-\xi_1, -\xi_2, \dots, -\xi_n)$ , then

$$P\{a_n(m_n + b_n) \leq x\} \rightarrow 1 - \exp(-e^x). \quad (1)$$

Suppose  $\xi_1, \xi_2, \dots, \xi_n$  are standard normal variables with covariance matrix  $\Lambda^1 = (\Lambda_{ij}^1)$ , and  $\eta_1, \eta_2, \dots, \eta_n$  similarly with covariance matrix  $\Lambda^0 = (\Lambda_{ij}^0)$ , and let  $\sigma_{ij} = \max(|\Lambda_{ij}^1|, |\Lambda_{ij}^0|)$ . Then for any real  $u$ ,

$$\begin{aligned} & P\{\xi_j \leq u \text{ for } j = 1, \dots, n\} - P\{\eta_j \leq u \text{ for } j = 1, \dots, n\} \\ & \leq \frac{1}{2\pi} \sum_{1 \leq i < j \leq n} (\Lambda_{ij}^1 - \Lambda_{ij}^0)^+ (1 - \sigma_{ij}^2)^{-1/2} \exp\left\{-\frac{u^2}{1 + \sigma_{ij}}\right\} \end{aligned}$$

where  $(x)^+ = \max(0, x)$ .

*Proof.* Please refer to Theorem 4.2.1 in literature [2]. □

First we recall some notations,

$$d_p(z) = [2 - (\log p)^{-1}]z + c_p$$

where  $z$  be any real number, and  $p$  be any positive integer.  
Condition C.1:

$$\lim_{p \rightarrow +\infty} \sum_{1 \leq i < j \leq p} (1 - \rho_{i,j}^2)^{-1/2} \exp \left\{ -\frac{d_p(z)}{1 + |\rho_{i,j}|} \right\} = 0.$$

Let sequence  $Z = (Z_1, Z_2, \dots, Z_p)^T$  follows a  $p$ -dimension multivariate normal distribution with mean vector  $\mathbf{u} = (0, 0, \dots, 0)^T$  and covariance matrix  $\tilde{R} = (\rho_{q,s})_{q,s=1, \dots, p}$ . Suppose the above condition C.1 is satisfied for any real  $x$  and  $y$ , we can obtain that,

(i) For any real number  $x$  and  $y$ ,

$$\lim_{p \rightarrow +\infty} P_r \left\{ \frac{\left[ \max_{s=1, \dots, p} (Z_s) \right]^2 - c_p}{2 - (\log p)^{-1}} < x \right\} = \exp\{-\exp(-x)\}$$

and

$$\lim_{p \rightarrow +\infty} P_r \left\{ \frac{\left[ \min_{s=1, \dots, p} (Z_s) \right]^2 - c_p}{2 - (\log p)^{-1}} < y \right\} = \exp\{-\exp(-y)\}$$

(ii) For any real number  $x$  and  $y$ ,  $\left[ \max_{s=1, \dots, p} (Z_s) \right]^2$  and  $\left[ \min_{s=1, \dots, p} (Z_s) \right]^2$  are asymptotically independent, namely,

$$\begin{aligned} & \lim_{p \rightarrow +\infty} P_r \left\{ \frac{\left[ \max_{s=1, \dots, p} (Z_s) \right]^2 - c_p}{2 - (\log p)^{-1}} < x, \frac{\left[ \min_{s=1, \dots, p} (Z_s) \right]^2 - c_p}{2 - (\log p)^{-1}} < y \right\} \\ &= G(x)G(y) \end{aligned}$$

where distribution function  $G(x) = \exp\{-\exp(-x)\}$  and  $G(y) = \exp\{-\exp(-y)\}$ .

*Proof.* We first prove that (i).

Let  $d_p(x) = [2 - (\log p)^{-1}]x + c_p$ ,  $d_p(y) = [2 - (\log p)^{-1}]y + c_p$ , then

$$\begin{aligned}
& P \left\{ \frac{\left[ \max_{s=1, \dots, p} (X_s) \right]^2 - c_p}{2 - (\log p)^{-1}} < x \right\} \\
&= P \left\{ \left[ \max_{s=1, \dots, p} (X_s) \right]^2 < d_p(x) \right\} \\
&= P \left\{ -\sqrt{d_p(x)} < \max_{s=1, \dots, p} (X_s) < \sqrt{d_p(x)} \right\} \\
&= P \left\{ \max_{s=1, \dots, p} (X_s) < \sqrt{d_p(x)} \right\} - P \left\{ \max_{s=1, \dots, p} (X_s) \leq -\sqrt{d_p(x)} \right\}.
\end{aligned}$$

Similarly, we have

$$\begin{aligned}
& P \left\{ \frac{\left[ \max_{s=1, \dots, p} (Z_s) \right]^2 - c_p}{2 - (\log p)^{-1}} < x \right\} \\
&= P \left\{ \left[ \max_{s=1, \dots, p} (Z_s) \right]^2 < d_p(x) \right\} \\
&= P \left\{ \max_{s=1, \dots, p} (Z_s) < \sqrt{d_p(x)} \right\} - P \left\{ \max_{s=1, \dots, p} (Z_s) \leq -\sqrt{d_p(x)} \right\}.
\end{aligned}$$

Then, we have

$$\begin{aligned}
& P \left\{ \frac{\left[ \max_{s=1, \dots, p} (Z_s) \right]^2 - c_p}{2 - (\log p)^{-1}} < x \right\} - P \left\{ \frac{\left[ \max_{s=1, \dots, p} (X_s) \right]^2 - c_p}{2 - (\log p)^{-1}} < x \right\} \\
&= P \left\{ \max_{s=1, \dots, p} (Z_s) < \sqrt{d_p(x)} \right\} - P \left\{ \max_{s=1, \dots, p} (X_s) < \sqrt{d_p(x)} \right\} \\
&+ \left\{ P \left\{ \max_{s=1, \dots, p} (X_s) \leq -\sqrt{d_p(x)} \right\} - P \left\{ \max_{s=1, \dots, p} (Z_s) \leq -\sqrt{d_p(x)} \right\} \right\} \\
&\leq \frac{1}{2\pi} \sum_{1 \leq i < j \leq p} (\rho_{i,j} - a_{i,j})^+ (1 - \rho_{i,j}^2)^{-1/2} \exp \left\{ -\frac{d_p(x)}{1 + |\rho_{i,j}|} \right\} \\
&+ \frac{1}{2\pi} \sum_{1 \leq i < j \leq p} (a_{i,j} - \rho_{i,j})^+ (1 - \rho_{i,j}^2)^{-1/2} \exp \left\{ -\frac{d_p(x)}{1 + |\rho_{i,j}|} \right\}
\end{aligned}$$

$$\leq \frac{1}{\pi} \sum_{1 \leq i < j \leq p} (1 - \rho_{i,j}^2)^{-1/2} \exp \left\{ -\frac{d_p(x)}{1 + |\rho_{i,j}|} \right\} \rightarrow 0 \text{ as } p \rightarrow +\infty \quad (2)$$

where the first inequality is obtained by Lemma 1, and the second inequality is due to the condition C.1.

According to formula (2) and Lemma 1, we can obtain

$$\begin{aligned} & \lim_{p \rightarrow +\infty} P_r \left\{ \frac{\left[ \max_{s=1, \dots, p} (Z_s) \right]^2 - c_p}{2 - (\log p)^{-1}} < x \right\} \\ &= \lim_{p \rightarrow +\infty} P_r \left\{ \frac{\left[ \max_{s=1, \dots, p} (X_s) \right]^2 - c_p}{2 - (\log p)^{-1}} < x \right\} \\ &= \exp\{-\exp(-x)\}. \end{aligned}$$

Similarly, when condition C.1 is satisfied, we can obtain

$$\begin{aligned} & P \left\{ \frac{\left[ \min_{s=1, \dots, p} (Z_s) \right]^2 - c_p}{2 - (\log p)^{-1}} < x \right\} - P \left\{ \frac{\left[ \min_{s=1, \dots, p} (X_s) \right]^2 - c_p}{2 - (\log p)^{-1}} < x \right\} \\ &= P \left\{ \min_{s=1, \dots, p} (Z_s) < \sqrt{d_p(x)} \right\} - P \left\{ \min_{s=1, \dots, p} (X_s) < \sqrt{d_p(x)} \right\} \\ &+ \left\{ P \left\{ \min_{s=1, \dots, p} (X_s) \leq -\sqrt{d_p(x)} \right\} - P \left\{ \min_{s=1, \dots, p} (Z_s) \leq -\sqrt{d_p(x)} \right\} \right\} \\ &\leq \frac{1}{2\pi} \sum_{1 \leq i < j \leq p} (\rho_{i,j} - a_{i,j})^+ (1 - \rho_{i,j}^2)^{-1/2} \exp \left\{ -\frac{d_p(x)}{1 + |\rho_{i,j}|} \right\} \\ &+ \frac{1}{2\pi} \sum_{1 \leq i < j \leq p} (a_{i,j} - \rho_{i,j})^+ (1 - \rho_{i,j}^2)^{-1/2} \exp \left\{ -\frac{d_p(x)}{1 + |\rho_{i,j}|} \right\} \\ &\leq \frac{1}{\pi} \sum_{1 \leq i < j \leq p} (1 - \rho_{i,j}^2)^{-1/2} \exp \left\{ -\frac{d_p(x)}{1 + |\rho_{i,j}|} \right\} \rightarrow 0 \text{ as } p \rightarrow +\infty \quad (3) \end{aligned}$$

then, according to formula (3) and Lemma 1, we can obtain

$$\begin{aligned}
& \lim_{p \rightarrow +\infty} P_r \left\{ \frac{\left[ \min_{s=1, \dots, p} (Z_s) \right]^2 - c_p}{2 - (\log p)^{-1}} < y \right\} \\
&= \lim_{p \rightarrow +\infty} P_r \left\{ \frac{\left[ \min_{s=1, \dots, p} (X_s) \right]^2 - c_p}{2 - (\log p)^{-1}} < y \right\} \\
&= \exp\{-\exp(-y)\}
\end{aligned}$$

Next, we will prove (ii). According to Theorem 11.1.5 in literature [2], we can know that  $\max_{s=1, \dots, p} (Z_s)$  and  $\min_{s=1, \dots, p} (Z_s)$  are asymptotically independent. Obviously,  $\left[ \max_{s=1, \dots, p} (Z_s) \right]^2$  and  $\left[ \min_{s=1, \dots, p} (Z_s) \right]^2$  are also asymptotically independent.  $\square$

Denote  $X = (X_1, X_2, \dots, X_p)^\top$  follows a p-dimension multivariate standard normal distribution with mean  $\mathbf{u} = (0, 0, \dots, 0)^\top$  and covariance matrix  $I_{p \times p} = (a_{q,s})_{q,s=1, \dots, p}$  where  $a_{q,q} = 1$  and  $a_{q,s} = 0, q \neq s$ . Denotes  $\widetilde{\lambda}_{1,p} = \exp \left\{ -\frac{\left[ \max_{s=1, \dots, p} (X_s) \right]^2 - c_p}{2 - (\log p)^{-1}} \right\}$ ,  $\widetilde{\lambda}_{2,p} = \exp \left\{ -\frac{\left[ \min_{s=1, \dots, p} (X_s) \right]^2 - c_p}{2 - (\log p)^{-1}} \right\}$  and  $\widetilde{T}_5 = -2 \log(1 - e^{-\widetilde{\lambda}_{1,p}}) - 2 \log(1 - e^{-\widetilde{\lambda}_{2,p}})$ .

Let the non-zero mean  $|\mu_s| \geq \log p$ ,  $s \in \Omega$ . Suppose  $0 < v < 1 - \frac{1}{p^{1/2} \log p}$ . Under significance level  $\alpha > 0$  and alternative hypothesis  $H'_1$ , we can obtain

$$\lim_{p \rightarrow +\infty} P\{R_\alpha(\widetilde{T}_5) = 1\} = 1.$$

*Proof.*

$$\begin{aligned}
& P\{R_\alpha(\widetilde{T}_5) = 1\} \\
&= P\{\widetilde{T}_5 > C_\alpha\} \\
&= P\left\{-2 \log(1 - e^{-\widetilde{\lambda}_{1,p}}) - 2 \log(1 - e^{-\widetilde{\lambda}_{2,p}}) > C_\alpha\right\} \\
&\geq P\left\{-2 \log(1 - e^{-\widetilde{\lambda}_{1,p}}) > C_\alpha\right\} \\
&= P\left\{\log(1 - e^{-\widetilde{\lambda}_{1,p}}) < -\frac{C_\alpha}{2}\right\} \\
&= P\left\{1 - e^{-\widetilde{\lambda}_{1,p}} < e^{-\frac{C_\alpha}{2}}\right\}
\end{aligned}$$

$$\begin{aligned}
&= P \left\{ e^{-\widetilde{\lambda_{1,p}}} > 1 - e^{-\frac{C_\alpha}{2}} \right\} \\
&= P \left\{ -\widetilde{\lambda_{1,p}} > \log \left( 1 - e^{-\frac{C_\alpha}{2}} \right) \right\} \\
&= P \left\{ \widetilde{\lambda_{1,p}} < -\log \left( 1 - e^{-\frac{C_\alpha}{2}} \right) \right\} \\
&= P \left\{ \exp \left( -\frac{\left( \max_{s=1,\dots,p} (X_s) \right)^2 - c_p}{2 - (\log p)^{-1}} \right) < -\log \left( 1 - e^{-\frac{C_\alpha}{2}} \right) \right\} \\
&= P \left\{ \frac{\left( \max_{s=1,\dots,p} (X_s) \right)^2 - c_p}{2 - (\log p)^{-1}} > -\log \left( -\log \left( 1 - e^{-\frac{C_\alpha}{2}} \right) \right) \right\}, \tag{4}
\end{aligned}$$

where we let  $h_\alpha = -\log \left( -\log \left( 1 - e^{-\frac{C_\alpha}{2}} \right) \right)$ ,  $h_\alpha$  is a constant about  $\alpha$ , then we have

$$\begin{aligned}
&P \left\{ \frac{\left\{ \max_{s=1,\dots,p} (X_s) \right\}^2 - c_p}{2 - (\log p)^{-1}} > -\log \left( -\log \left( 1 - e^{-\frac{C_\alpha}{2}} \right) \right) \right\} \\
&= P \left\{ \left( \max_{s=1,\dots,p} (X_s) \right)^2 > h_\alpha [2 - (\log p)^{-1}] + c_p \right\} \\
&= 1 - P \left\{ \left( \max_{s=1,\dots,p} (X_s) \right)^2 \leq h_\alpha [2 - (\log p)^{-1}] + c_p \right\} \\
&= 1 - P \left\{ \left( \max_{s=1,\dots,p} (X_s) \right)^2 \leq d_p(h_\alpha) \right\} \\
&= 1 - P \left\{ -[d_p(h_\alpha)]^{\frac{1}{2}} \leq \max_{s=1,\dots,p} (X_s) \leq [d_p(h_\alpha)]^{\frac{1}{2}} \right\} \\
&\geq 1 - P \left\{ \max_{s=1,\dots,p} (X_s) \leq [d_p(h_\alpha)]^{\frac{1}{2}} \right\} \\
&= 1 - P \left\{ \max \left[ \max_{s \in \Omega} (X_s), \max_{s \in \Omega^c} (X_s) \right] \leq [d_p(h_\alpha)]^{\frac{1}{2}} \right\} \\
&= 1 - P \left\{ \max_{s \in \Omega} (X_s) \leq [d_p(h_\alpha)]^{\frac{1}{2}} \right\} \times P \left\{ \max_{s \in \Omega^c} (X_s) \leq [d_p(h_\alpha)]^{\frac{1}{2}} \right\} \\
&\geq 1 - P \left\{ \max_{s \in \Omega} (X_s) \leq [d_p(h_\alpha)]^{\frac{1}{2}} \right\}. \tag{5}
\end{aligned}$$

The reciprocal third equation is derived from the alternative hypothesis  $H_1'$ .

We first prove the limit of  $P \left\{ \max_{s \in \Omega} (X_s) \leq [d_p(h_\alpha)]^{\frac{1}{2}} \right\} \rightarrow 0$  when  $p \rightarrow +\infty$ , then, by Lemma 1, we have

$$\begin{aligned}
& P \left\{ \max_{s \in \Omega} (X_s) \leq [d_p(h_\alpha)]^{\frac{1}{2}} \right\} \\
&= P \left\{ \max_{s \in \Omega} (X_s - \mu_s) \leq [d_p(h_\alpha)]^{\frac{1}{2}} - \mu_s \right\} \\
&\leq P \left\{ \max_{s \in \Omega} (X_s - \mu_s) \leq [d_p(h_\alpha)]^{\frac{1}{2}} - \log p \right\} \\
&= P \left\{ a_{p^v} \left[ \max_{s \in \Omega} (X_s - \mu_s) - b_{p^v} \right] \leq a_{p^v} \left[ (d_p(h_\alpha))^{\frac{1}{2}} - \log p - b_{p^v} \right] \right\} \\
&\rightarrow \exp \left\{ -\exp \left\{ -a_{p^v} \left[ (d_p(h_\alpha))^{\frac{1}{2}} - \log p - b_{p^v} \right] \right\} \right\},
\end{aligned}$$

where  $a_{p^v} = (2 \log p^v)^{1/2}$ ,  $b_{p^v} = (2 \log p^v)^{1/2} - \frac{1}{2}(2 \log p^v)^{-1/2}(\log \log p^v + \log 4\pi)$ ,  
 $c_p = 2 \log(p) - [\log(\log p) + \log(4\pi)] + \frac{\log(\log p) + \log(4\pi)}{2 \log(p)}$ .

Since  $0 < v < 1 - \frac{1}{p^{1/2} \log p}$ , when  $p \rightarrow +\infty$ , it is obvious that

$$a_{p^v} \left[ (d_p(h_\alpha))^{\frac{1}{2}} - \log p - b_{p^v} \right] = O \left( -\sqrt{2v} (\log p)^{\frac{3}{2}} \right) \rightarrow -\infty,$$

which means that

$$\exp \left\{ -\exp \left\{ -a_{p^v} \left[ (d_p(h_\alpha))^{\frac{1}{2}} - \log p - b_{p^v} \right] \right\} \right\} \rightarrow 0.$$

So, we have

$$P \left\{ \max_{s \in \Omega} (X_s) \leq [d_p(h_\alpha)]^{\frac{1}{2}} \right\} \rightarrow 0, \text{ as } p \rightarrow +\infty. \quad (6)$$

Next, according to formula (5) and (6), applying the squeeze theorem, we have

$$\lim_{p \rightarrow +\infty} \left\{ 1 - P \left\{ \max_{s=1, \dots, p} (X_s) \leq [d_p(h_\alpha)]^{\frac{1}{2}} \right\} \right\} = 1. \quad (7)$$

According to formulas (4) and (5), we have the following inequalities

$$1 \geq P\{R_\alpha(\widetilde{T}_5) = 1\} \geq 1 - P \left\{ \max_{s=1, \dots, p} (X_s) \leq [d_p(h_\alpha)]^{\frac{1}{2}} \right\},$$

applying the squeeze theorem, by formula (7), we have

$$\lim_{p \rightarrow +\infty} P\{R_\alpha(\widetilde{T}_5) = 1\} = 1.$$



□

Let the non-zero mean  $|\mu_s| \geq \log p$ ,  $s \in \Omega$ . Suppose  $0 < v < 1 - \frac{1}{p^{1/2} \log p}$ . Under significance level  $\alpha > 0$  and alternative hypothesis  $H_1$ , we can obtain

$$\lim_{p \rightarrow +\infty} P\{R_\alpha(\widetilde{T}_5) = 1\} = 1.$$

*Proof.* According to the proof of Lemma 1, by applying formula (4) and (5), we have

$$\begin{aligned}
& P\{R_\alpha(\widetilde{T}_5) = 1\} \\
&= P\{\widetilde{T}_5 > C_\alpha\} \\
&= P\left\{-2\log(1 - e^{-\widetilde{\lambda}_{1,p}}) - 2\log(1 - e^{-\widetilde{\lambda}_{2,p}}) > C_\alpha\right\} \\
&\geq P\left\{-2\log(1 - e^{-\widetilde{\lambda}_{1,p}}) > C_\alpha\right\} \\
&= P\left\{\frac{\left(\max_{s=1,\dots,p}(X_s)\right)^2 - c_p}{2 - (\log p)^{-1}} > -\log\left(-\log\left(1 - e^{-\frac{C_\alpha}{2}}\right)\right)\right\} \\
&= 1 - P\left\{-[d_p(h_\alpha)]^{\frac{1}{2}} \leq \max_{s=1,\dots,p}(X_s) \leq [d_p(h_\alpha)]^{\frac{1}{2}}\right\} \tag{8} \\
&\geq 1 - P\left\{\max_{s=1,\dots,p}(X_s) \leq [d_p(h_\alpha)]^{\frac{1}{2}}\right\} \\
&= 1 - P\left\{\max\left[\max_{s \in \Omega_1}(X_s), \max_{s \in \Omega_2}(X_s), \max_{s \in \Omega^c}(X_s)\right] \leq [d_p(h_\alpha)]^{\frac{1}{2}}\right\} \\
&= 1 - P\left\{\max_{s \in \Omega_1}(X_s) \leq [d_p(h_\alpha)]^{\frac{1}{2}}\right\} \times P\left\{\max_{s \in \Omega_2}(X_s) \leq [d_p(h_\alpha)]^{\frac{1}{2}}\right\} \times \\
&\quad P\left\{\max_{s \in \Omega^c}(X_s) \leq [d_p(h_\alpha)]^{\frac{1}{2}}\right\} \\
&\geq 1 - P\left\{\max_{s \in \Omega_1}(X_s) \leq [d_p(h_\alpha)]^{\frac{1}{2}}\right\}.
\end{aligned}$$

The reciprocal third equation is derived from the alternative hypothesis  $H_1$ .

We first prove the limit of  $P\left\{\max_{s \in \Omega_1}(X_s) \leq [d_p(h_\alpha)]^{\frac{1}{2}}\right\} \rightarrow 0$  when  $p \rightarrow +\infty$ , then, by Lemma 1, we have

$$\begin{aligned}
& P\left\{\max_{s \in \Omega_1}(X_s) \leq [d_p(h_\alpha)]^{\frac{1}{2}}\right\} \\
&= P\left\{\max_{s \in \Omega_1}(X_s - \mu_s) \leq [d_p(h_\alpha)]^{\frac{1}{2}} - \mu_s\right\}
\end{aligned}$$

$$\begin{aligned}
&\leq P \left\{ \max_{s \in \Omega_1} (X_s - \mu_s) \leq [d_p(h_\alpha)]^{\frac{1}{2}} - \log p \right\} \\
&= P \left\{ a_{p^{v_1}} \left[ \max_{s \in \Omega_1} (X_s - \mu_s) - b_{p^{v_1}} \right] \leq a_{p^{v_1}} \left[ (d_p(h_\alpha))^{\frac{1}{2}} - \log p - b_{p^{v_1}} \right] \right\} \\
&\rightarrow \exp \left\{ -\exp \left\{ -a_{p^{v_1}} \left[ (d_p(h_\alpha))^{\frac{1}{2}} - \log p - b_{p^{v_1}} \right] \right\} \right\},
\end{aligned}$$

where  $a_{p^{v_1}} = (2 \log p^{v_1})^{1/2}$ ,  $b_{p^{v_1}} = (2 \log p^{v_1})^{1/2} - \frac{1}{2}(2 \log p^{v_1})^{-1/2}(\log \log p^{v_1} + \log 4\pi)$ ,  $c_p = 2 \log(p) - [\log(\log p) + \log(4\pi)] + \frac{\log(\log p) + \log(4\pi)}{2 \log(p)}$ .  
Since  $0 < v_1 < v < 1 - \frac{1}{p^{1/2} \log p}$ , when  $p \rightarrow +\infty$ , it is obvious that

$$a_{p^{v_1}} \left[ (d_p(h_\alpha))^{\frac{1}{2}} - \log p - b_{p^{v_1}} \right] = O \left( -\sqrt{2v_1}(\log p)^{\frac{3}{2}} \right) \rightarrow -\infty,$$

which means that

$$\exp \left\{ -\exp \left\{ -a_{p^{v_1}} \left[ (h_\alpha (2 - (\log p)^{-1}) + c_p) \right]^{\frac{1}{2}} - \log p - b_{p^{v_1}} \right] \right\} \right\} \rightarrow 0.$$

So, we have

$$P \left\{ \max_{s \in \Omega_1} (X_s) \leq [d_p(h_\alpha)]^{\frac{1}{2}} \right\} \rightarrow 0, \text{ as } p \rightarrow +\infty. \quad (9)$$

According to formula (8), we have the following inequalities

$$1 \geq P\{R_\alpha(\widetilde{T}_5) = 1\} \geq 1 - P \left\{ \max_{s \in \Omega_1} (X_s) \leq [d_p(h_\alpha)]^{\frac{1}{2}} \right\},$$

applying the squeeze theorem, by formula (9) we have

$$\lim_{p \rightarrow +\infty} P\{R_\alpha(\widetilde{T}_5) = 1\} = 1.$$

□

## 2 PROOFS OF LEMMAS AND THEOREMS

**Proof of Theorem 1.** For convenience, let  $W_1 = \max_{s=1, \dots, p} \{Z_s\}$ ,  $W_2 = \min_{s=1, \dots, p} \{Z_s\}$ .  
According to Lemma 1, for any real numbers  $x$  and  $y$ ,

$$\begin{aligned}
c_p &= 2 \log(p) - [\log(\log p) + \log(4\pi)] + \frac{\log(\log p) + \log(4\pi)}{2 \log(p)} \\
\lim_{p \rightarrow +\infty} P_r \left( \frac{W_1^2 - c_p}{2 - (\log p)^{-1}} < x \right) &= \exp\{-\exp(-x)\} = G(x) \\
\lim_{p \rightarrow +\infty} P_r \left( \frac{W_2^2 - c_p}{2 - (\log p)^{-1}} < y \right) &= \exp\{-\exp(-y)\} = G(y)
\end{aligned}$$

and  $W_1^2$  and  $W_2^2$  are asymptotically independent we can obtain that,

$$P_{W_1^2} = 1 - G\left(\frac{W_1^2 - c_p}{2 - (\log p)^{-1}}\right) = 1 - \exp\left\{-\exp\left(-\frac{W_1^2 - c_p}{2 - (\log p)^{-1}}\right)\right\},$$

$$P_{W_2^2} = 1 - G\left(\frac{W_2^2 - c_p}{2 - (\log p)^{-1}}\right) = 1 - \exp\left\{-\exp\left(-\frac{W_2^2 - c_p}{2 - (\log p)^{-1}}\right)\right\}.$$

Denote  $\lambda_{1,p} = \exp\left(-\frac{W_1^2 - c_p}{2 - (\log p)^{-1}}\right)$  and  $\lambda_{2,p} = \exp\left(-\frac{W_2^2 - c_p}{2 - (\log p)^{-1}}\right)$ , we can obtain that,

$$P_{W_1^2} = 1 - e^{-\lambda_{1,p}} \sim U(0, 1)$$

$$P_{W_2^2} = 1 - e^{-\lambda_{2,p}} \sim U(0, 1).$$

Then, according to the literature [3], we have

$$-2\log(P_{W_1^2}) = -2\log(1 - e^{-\lambda_{1,p}}) \sim \chi^2(2)$$

$$-2\log(P_{W_2^2}) = -2\log(1 - e^{-\lambda_{2,p}}) \sim \chi^2(2),$$

where  $\chi^2(2)$  denotes the chi-square distribution with degrees of freedom 2, and the distribution function is  $F(x, n) = \int_0^x \frac{1}{2^{\frac{n}{2}} \Gamma(\frac{n}{2})} t^{\frac{n}{2}-1} e^{-\frac{t}{2}} dt$ .

Because  $W_1^2$  and  $W_2^2$  are asymptotically independent when  $p \rightarrow +\infty$ , and  $-2\log(1 - e^{-\lambda_{1,p}})$  and  $-2\log(1 - e^{-\lambda_{2,p}})$  are functions of  $W_1^2$  and  $W_2^2$ , respectively, then  $-2\log(1 - e^{-\lambda_{1,p}})$  and  $-2\log(1 - e^{-\lambda_{2,p}})$  are also asymptotically independent when  $p \rightarrow +\infty$ .

Through the regeneration of chi-square distribution, when  $p \rightarrow +\infty$ , we can obtain that,

$$T_5 = -2\log(1 - e^{-\lambda_{1,p}}) - 2\log(1 - e^{-\lambda_{2,p}}) \sim \chi^2(4).$$

□

Next is the proof of the asymptotic power  $R_\alpha(T_5)$  of  $T_5$ . Before the proof, we first recall some symbols about  $T_5$ .

$$c_p = 2\log(p) - [\log(\log p) + \log(4\pi)] + \frac{\log(\log p) + \log(4\pi)}{2\log(p)},$$

$$\lambda_{1,p} = \exp\left(-\frac{\left[\max_{s=1, \dots, p} (Z_s)\right]^2 - c_p}{2 - (\log p)^{-1}}\right),$$

$$\lambda_{2,p} = \exp \left( - \frac{\left[ \min_{s=1,\dots,p} (Z_s) \right]^2 - c_p}{2 - (\log p)^{-1}} \right),$$

$$T_5 = -2 \log(1 - e^{-\lambda_{1,p}}) - 2 \log(1 - e^{-\lambda_{2,p}}).$$

**Proof of Theorem 2.**

$$\begin{aligned} & P\{R_\alpha(T_5) = 1\} \\ &= P\{T_5 > C_\alpha\} \\ &= P\{-2 \log(1 - e^{-\lambda_{1,p}}) - 2 \log(1 - e^{-\lambda_{2,p}}) > C_\alpha\} \\ &\geq P\{-2 \log(1 - e^{-\lambda_{1,p}}) > C_\alpha\} \\ &= P\left\{\log(1 - e^{-\lambda_{1,p}}) < -\frac{C_\alpha}{2}\right\} \\ &= P\left\{-\lambda_{1,p} > \log\left(1 - e^{-\frac{C_\alpha}{2}}\right)\right\} \\ &= P\left\{\lambda_{1,p} < -\log\left(1 - e^{-\frac{C_\alpha}{2}}\right)\right\} \\ &= P\left\{\exp\left(-\frac{\left(\max_{s=1,\dots,p} (Z_s)\right)^2 - c_p}{2 - (\log p)^{-1}}\right) < -\log\left(1 - e^{-\frac{C_\alpha}{2}}\right)\right\} \\ &= P\left\{\frac{\left(\max_{s=1,\dots,p} (Z_s)\right)^2 - c_p}{2 - (\log p)^{-1}} > -\log\left(-\log\left(1 - e^{-\frac{C_\alpha}{2}}\right)\right)\right\} \\ &= P\left\{\left(\max_{s=1,\dots,p} (Z_s)\right)^2 > h_\alpha [2 - (\log p)^{-1}] + c_p\right\} \\ &= 1 - P\left\{\left(\max_{s=1,\dots,p} (Z_s)\right)^2 \leq h_\alpha [2 - (\log p)^{-1}] + c_p\right\} \end{aligned} \tag{10}$$

Since condition C.1 holds, according to (2), we can deduce that

$$\begin{aligned} & \lim_{p \rightarrow +\infty} P\left\{\left(\max_{s=1,\dots,p} (Z_s)\right)^2 \leq h_\alpha [2 - (\log p)^{-1}] + c_p\right\} \\ &= \lim_{p \rightarrow +\infty} P\left\{\left(\max_{s=1,\dots,p} (X_s)\right)^2 \leq h_\alpha [2 - (\log p)^{-1}] + c_p\right\}. \end{aligned} \tag{11}$$

According to the formulas (5) and (7), applying the Squeeze Theorem, we have

$$\lim_{p \rightarrow +\infty} P \left\{ \left( \max_{s=1, \dots, p} (X_s) \right)^2 \leq h_\alpha [2 - (\log p)^{-1}] + c_p \right\} = 0$$

According to (11), we have

$$\begin{aligned} & \lim_{p \rightarrow +\infty} P \left\{ \left( \max_{s=1, \dots, p} (Z_s) \right)^2 > h_\alpha [2 - (\log p)^{-1}] + c_p \right\} \\ &= 1 - \lim_{p \rightarrow +\infty} P \left\{ \left( \max_{s=1, \dots, p} (Z_s) \right)^2 \leq h_\alpha [2 - (\log p)^{-1}] + c_p \right\} \\ &= 1 - \lim_{p \rightarrow +\infty} P \left\{ \left( \max_{s=1, \dots, p} (X_s) \right)^2 \leq h_\alpha [2 - (\log p)^{-1}] + c_p \right\} \\ &= 1. \end{aligned}$$

According to formula (10), we can obtain the following inequalities

$$1 \geq P\{R_\alpha(T_5) = 1\} \geq P \left\{ \left( \max_{s=1, \dots, p} (Z_s) \right)^2 > h_\alpha [2 - (\log p)^{-1}] + c_p \right\}, \quad (12)$$

applying the squeeze theorem, we have

$$\lim_{p \rightarrow +\infty} P\{R_\alpha(T_5) = 1\} = 1$$

□

**Proof of Theorem 3.** The proof of Theorem 3.2 and Lemma 1 is similar. According to (10), we have

$$\begin{aligned} & P\{R_\alpha(T_5) = 1\} \\ &= P\{T_5 > C_\alpha\} \\ &= P\{-2\log(1 - e^{-\lambda_{1,p}}) - 2\log(1 - e^{-\lambda_{2,p}}) > C_\alpha\} \\ &\geq P\{-2\log(1 - e^{-\lambda_{1,p}}) > C_\alpha\} \\ &= P \left\{ \left( \max_{s=1, \dots, p} (Z_s) \right)^2 > h_\alpha [2 - (\log p)^{-1}] + c_p \right\} \\ &= 1 - P \left\{ \left( \max_{s=1, \dots, p} (Z_s) \right)^2 \leq h_\alpha [2 - (\log p)^{-1}] + c_p \right\} \end{aligned}$$

$$= 1 - P \left\{ \left( \max_{s=1, \dots, p} (Z_s) \right)^2 \leq d_p(h_\alpha) \right\}$$

Since condition C.1 holds, according to (2), (8) and (9), under the alternative hypothesis  $H_1$ , we have

$$\begin{aligned} & \lim_{p \rightarrow +\infty} P \left\{ \left( \max_{s=1, \dots, p} (Z_s) \right)^2 > d_p(h_\alpha) \right\} \\ &= 1 - \lim_{p \rightarrow +\infty} P \left\{ \left( \max_{s=1, \dots, p} (Z_s) \right)^2 \leq d_p(h_\alpha) \right\} \\ &= 1 - \lim_{p \rightarrow +\infty} P \left\{ \left( \max_{s=1, \dots, p} (X_s) \right)^2 \leq d_p(h_\alpha) \right\} \\ &= 1 - \lim_{p \rightarrow +\infty} P \left\{ -[d_p(h_\alpha)]^{\frac{1}{2}} \leq \max_{s=1, \dots, p} (X_s) \leq [d_p(h_\alpha)]^{\frac{1}{2}} \right\} \\ &\geq 1 - \lim_{p \rightarrow +\infty} P \left\{ \max_{s=1, \dots, p} (X_s) \leq [d_p(h_\alpha)]^{\frac{1}{2}} \right\} \\ &= 1 - \lim_{p \rightarrow +\infty} P \left\{ \max \left[ \max_{s \in \Omega_1} (X_s), \max_{s \in \Omega_2} (X_s), \max_{s \in \Omega^c} (X_s) \right] \leq [d_p(h_\alpha)]^{\frac{1}{2}} \right\} \\ &\geq 1 - \lim_{p \rightarrow +\infty} P \left\{ \max_{s \in \Omega_1} (X_s) \leq [d_p(h_\alpha)]^{\frac{1}{2}} \right\} \\ &= 1 - 0 \\ &= 1. \end{aligned}$$

Which means that

$$\lim_{p \rightarrow +\infty} P \left\{ \left( \max_{s=1, \dots, p} (Z_s) \right)^2 > d_p(h_\alpha) \right\} = 1.$$

According to the inequality

$$1 \geq P\{R_\alpha(T_5) = 1\} \geq P \left\{ \left( \max_{s=1, \dots, p} (Z_s) \right)^2 > d_p(h_\alpha) \right\},$$

applying the squeeze theorem, we have

$$\lim_{p \rightarrow +\infty} P\{R_\alpha(T_5) = 1\} = 1.$$

□

**Proof of Theorem 4.** Since  $P(T_5 > C_\alpha) = P\{R_\alpha(T_5) = 1\}$ , according to the above proof of Theorem 3, we can get the following inequality

$$\beta_{T_5} \geq P \left\{ \left( \max_{s=1, \dots, p} (Z_s) \right)^2 > h_\alpha [2 - (\log p)^{-1}] + c_p \right\}, \quad (13)$$

there the inequality follow from (12),  $C_\alpha$  is a constant about  $\alpha$ , and it may represent different constants at different positions.

$$\begin{aligned} \beta_{T_4} &= P \left\{ \frac{\left( \max_{s=1, \dots, p} (Z_s) \right)^2 + \left( \min_{s=1, \dots, p} (Z_s) \right)^2 - 2c_p}{2 - (\log p)^{-1}} > C_\alpha \right\} \\ &= P \left\{ \left( \max_{s=1, \dots, p} (Z_s) \right)^2 + \left( \min_{s=1, \dots, p} (Z_s) \right)^2 > C_\alpha [2 - (\log p)^{-1}] + 2c_p \right\} \\ &\leq P \left\{ \left( \max_{s=1, \dots, p} (Z_s) \right)^2 > C_\alpha [2 - (\log p)^{-1}] + 2c_p \right\} + \\ &\quad P \left\{ \left( \min_{s=1, \dots, p} (Z_s) \right)^2 > C_\alpha [2 - (\log p)^{-1}] + 2c_p \right\} \end{aligned} \quad (14)$$

Because when  $\alpha$  is fixed,  $p \rightarrow +\infty$ , we have

$$C_\alpha [2 - (\log p)^{-1}] + 2c_p \geq h_\alpha [2 - (\log p)^{-1}] + c_p.$$

Then when  $p \rightarrow +\infty$ , we have

$$\begin{aligned} &P \left\{ \left( \max_{s=1, \dots, p} (Z_s) \right)^2 > C_\alpha [2 - (\log p)^{-1}] + 2c_p \right\} \\ &\leq P \left\{ \left( \max_{s=1, \dots, p} (Z_s) \right)^2 > h_\alpha [2 - (\log p)^{-1}] + c_p \right\} \\ &\leq P(T_5 > C_\alpha) \\ &= \beta_{T_5} \end{aligned} \quad (15)$$

there the second inequality follow from (13).

Similarly, we can also conclude that

$$P \left\{ \left( \min_{s=1, \dots, p} (Z_s) \right)^2 > C_\alpha [2 - (\log p)^{-1}] + 2c_p \right\}$$

$$\leq P \left\{ \left( \min_{s=1, \dots, p} (Z_s) \right)^2 > h_\alpha [2 - (\log p)^{-1}] + c_p \right\} \quad (16)$$

Since condition C.1 holds, according to (3), we can deduce that

$$\begin{aligned} & \lim_{p \rightarrow +\infty} P \left\{ \left( \min_{s=1, \dots, p} (Z_s) \right)^2 > h_\alpha [2 - (\log p)^{-1}] + c_p \right\} \\ &= 1 - \lim_{p \rightarrow +\infty} P \left\{ \left( \min_{s=1, \dots, p} (Z_s) \right)^2 \leq h_\alpha [2 - (\log p)^{-1}] + c_p \right\} \\ &= 1 - \lim_{p \rightarrow +\infty} P \left\{ \left( \min_{s=1, \dots, p} (X_s) \right)^2 \leq h_\alpha [2 - (\log p)^{-1}] + c_p \right\} \\ &= \lim_{p \rightarrow +\infty} P \left\{ \left( \min_{s=1, \dots, p} (X_s) \right)^2 > h_\alpha [2 - (\log p)^{-1}] + c_p \right\}. \end{aligned} \quad (17)$$

First we recall some notations. Under alternative hypothesis  $H_1$ , denote the index set of nonzero signals by  $\Omega = \{i : 1 \leq i \leq p, \mu_i \neq 0\}$  and let the total number of nonzero signals be  $p^v$ , where the parameter  $v (0 < v < 1)$  measures the sparsity of the nonzero mean. Similarly, denote the index set of zero signals by  $\Omega^c = \{i : 1 \leq i \leq p, \mu_i = 0\}$  and let the total number of zero signals be  $p^k$ , where  $0 < k < 1$  and  $p^v + p^k = p$ . Since non-zero signals include positive and negative, we divide  $\Omega$  into two parts, where  $\Omega_1 = \{i : 1 \leq i \leq p, \mu_i > 0\}$  represents the index set of positive non-zero signals, and let the total number of non-zero signals be  $p^{v_1}$  ( $0 < v_1 < v$ ),  $\Omega_2 = \{i : 1 \leq i \leq p, \mu_i < 0\}$  represents the index set of negative non-zero signals, and let the total number of non-zero signals be  $p^{v_2}$  ( $0 < v_2 < v$ ),  $p^{v_1} + p^{v_2} = p^v$ .

Now, we have

$$\begin{aligned} & P \left\{ \left( \min_{s=1, \dots, p} (X_s) \right)^2 > h_\alpha [2 - (\log p)^{-1}] + c_p \right\} \\ &= P \left\{ \left( \min_{s=1, \dots, p} (X_s) \right)^2 > d_p(h_\alpha) \right\} \\ &= P \left\{ \min_{s=1, \dots, p} (X_s) > [d_p(h_\alpha)]^{\frac{1}{2}} \right\} + P \left\{ \min_{s=1, \dots, p} (X_s) < -[d_p(h_\alpha)]^{\frac{1}{2}} \right\} \\ &\leq P \left\{ \min_{s=1, \dots, p} (X_s) > [d_p(h_\alpha)]^{\frac{1}{2}} \right\} \\ &= P \left\{ \min \left[ \min_{s \in \Omega_1} (X_s), \min_{s \in \Omega_2} (X_s), \min_{s \in \Omega^c} (X_s) \right] > [d_p(h_\alpha)]^{\frac{1}{2}} \right\} \\ &= P \left\{ \min_{s \in \Omega_1} (X_s) > [d_p(h_\alpha)]^{\frac{1}{2}} \right\} \times P \left\{ \min_{s \in \Omega_2} (X_s) > [d_p(h_\alpha)]^{\frac{1}{2}} \right\} \times \end{aligned}$$



$$P \left\{ \min_{s \in \Omega^c} (X_s) > [d_p(h_\alpha)]^{\frac{1}{2}} \right\}. \quad (18)$$

The penultimate equation is from is obtained under the alternative hypothesis  $H_1$ .

We first prove the limit of  $P \left\{ \min_{s \in \Omega_1} (X_s) > [d_p(h_\alpha)]^{\frac{1}{2}} \right\} \rightarrow 1$  when  $p \rightarrow +\infty$ , then, by formula (1), we have

$$\begin{aligned} & P \left\{ \min_{s \in \Omega_1} (X_s) > [d_p(h_\alpha)]^{\frac{1}{2}} \right\} \\ &= P \left\{ \min_{s \in \Omega_1} (X_s - \mu_s) > [d_p(h_\alpha)]^{\frac{1}{2}} - \mu_s \right\} \\ &\geq P \left\{ \min_{s \in \Omega_1} (X_s - \mu_s) > [d_p(h_\alpha)]^{\frac{1}{2}} - \log p \right\} \\ &= P \left\{ a_{p^{v_1}} \left[ \min_{s \in \Omega_1} (X_s - \mu_s) + b_{p^{v_1}} \right] > a_{p^{v_1}} \left[ (d_p(h_\alpha))^{\frac{1}{2}} - \log p + b_{p^{v_1}} \right] \right\} \\ &\rightarrow \exp \left\{ -\exp \left\{ a_{p^{v_1}} \left[ (d_p(h_\alpha))^{\frac{1}{2}} - \log p + b_{p^{v_1}} \right] \right\} \right\}, \end{aligned}$$

where  $a_{p^{v_1}} = (2 \log p^{v_1})^{1/2}$ ,  $b_{p^{v_1}} = (2 \log p^{v_1})^{1/2} - \frac{1}{2}(2 \log p^{v_1})^{-1/2}(\log \log p^{v_1} + \log 4\pi)$ ,  $c_p = 2 \log(p) - [\log(\log p) + \log(4\pi)] + \frac{\log(\log p) + \log(4\pi)}{2 \log(p)}$ .

Since  $0 < v_1 < v < 1 - \frac{1}{p^{1/2} \log p}$ , when  $p \rightarrow +\infty$ , it is obvious that

$$a_{p^{v_1}} \left[ (d_p(h_\alpha))^{\frac{1}{2}} - \log p + b_{p^{v_1}} \right] = O \left( -\sqrt{2v_1}(\log p)^{\frac{3}{2}} \right) \rightarrow -\infty,$$

which means that

$$\exp \left\{ -\exp \left\{ a_{p^{v_1}} \left[ (d_p(h_\alpha))^{\frac{1}{2}} - \log p + b_{p^{v_1}} \right] \right\} \right\} \rightarrow 1,$$

So, we have

$$P \left\{ \min_{s \in \Omega_1} (X_s) > [d_p(h_\alpha)]^{\frac{1}{2}} \right\} \rightarrow 1, \text{ as } p \rightarrow +\infty. \quad (19)$$

Secondly, we prove that  $P \left\{ \min_{s \in \Omega_2} (X_s) > [d_p(h_\alpha)]^{\frac{1}{2}} \right\} \rightarrow 0$  as  $p \rightarrow +\infty$ , then, by formula (1), we have

$$\begin{aligned} & P \left\{ \min_{s \in \Omega_2} (X_s) > [d_p(h_\alpha)]^{\frac{1}{2}} \right\} \\ &= P \left\{ \min_{s \in \Omega_2} (X_s - \mu_s) > [d_p(h_\alpha)]^{\frac{1}{2}} - \mu_s \right\} \\ &\leq P \left\{ \min_{s \in \Omega_2} (X_s - \mu_s) > [d_p(h_\alpha)]^{\frac{1}{2}} + \log p \right\} \end{aligned}$$

$$\begin{aligned}
&= P \left\{ a_{p^{v_2}} \left[ \min_{s \in \Omega_2} (X_s - \mu_s) + b_{p^{v_2}} \right] > a_{p^{v_2}} \left[ (d_p(h_\alpha))^{\frac{1}{2}} + \log p + b_{p^{v_2}} \right] \right\} \\
&\rightarrow \exp \left\{ - \exp \left\{ a_{p^{v_2}} \left[ (d_p(h_\alpha))^{\frac{1}{2}} + \log p + b_{p^{v_2}} \right] \right\} \right\},
\end{aligned}$$

where  $a_{p^{v_2}} = (2 \log p^{v_2})^{1/2}$ ,  $b_{p^{v_2}} = (2 \log p^{v_2})^{1/2} - \frac{1}{2}(2 \log p^{v_2})^{-1/2}(\log \log p^{v_2} + \log 4\pi)$ ,  $c_p = 2 \log(p) - [\log(\log p) + \log(4\pi)] + \frac{\log(\log p) + \log(4\pi)}{2 \log(p)}$ .

Since  $0 < v_2 < v < 1 - \frac{1}{p^{1/2} \log p}$ , when  $p \rightarrow +\infty$ , it is obvious that

$$a_{p^{v_2}} \left[ (d_p(h_\alpha))^{\frac{1}{2}} + \log p + b_{p^{v_2}} \right] = O \left( \sqrt{2v_2} (\log p)^{\frac{3}{2}} \right) \rightarrow +\infty,$$

which means that

$$\exp \left\{ - \exp \left\{ a_{p^{v_2}} \left[ (d_p(h_\alpha))^{\frac{1}{2}} + \log p + b_{p^{v_2}} \right] \right\} \right\} \rightarrow 0, \text{ as } p \rightarrow +\infty.$$

So, we have

$$P \left\{ \min_{s \in \Omega_2} (X_s) > [d_p(h_\alpha)]^{\frac{1}{2}} \right\} \rightarrow 0, \text{ as } p \rightarrow +\infty. \quad (20)$$

Finally, we prove the limit of  $P \left\{ \min_{s \in \Omega^c} (X_s) > [d_p(h_\alpha)]^{\frac{1}{2}} \right\} \rightarrow 0$  when  $p \rightarrow +\infty$ . By formula (1), we have

$$\begin{aligned}
&P \left\{ \min_{s \in \Omega^c} (X_s) > [d_p(h_\alpha)]^{\frac{1}{2}} \right\} \\
&= P \left\{ a_{p^k} \left[ \min_{s \in \Omega^c} (X_s) + b_{p^k} \right] > a_{p^k} \left[ (d_p(h_\alpha))^{\frac{1}{2}} + b_{p^k} \right] \right\} \\
&\rightarrow \exp \left\{ - \exp \left\{ a_{p^k} \left[ (d_p(h_\alpha))^{\frac{1}{2}} + b_{p^k} \right] \right\} \right\},
\end{aligned}$$

where  $a_{p^k} = (2 \log p^k)^{1/2}$ ,  $c_p = 2 \log(p) - [\log(\log p) + \log(4\pi)] + \frac{\log(\log p) + \log(4\pi)}{2 \log(p)}$ ,  $b_{p^k} = (2 \log p^k)^{1/2} - \frac{1}{2}(2 \log p^k)^{-1/2}(\log \log p^k + \log 4\pi)$ .

Since  $0 < k < 1$ , it is obvious that

$$a_{p^k} \left[ (d_p(h_\alpha))^{\frac{1}{2}} + b_{p^k} \right] = O \left( 2\sqrt{k} \log p \right) \rightarrow +\infty, \text{ as } p \rightarrow +\infty.$$

which means that

$$\exp \left\{ - \exp \left\{ a_{p^k} \left[ (d_p(h_\alpha))^{\frac{1}{2}} + b_{p^k} \right] \right\} \right\} \rightarrow 0, \text{ as } p \rightarrow +\infty.$$

So, we have

$$P \left\{ \max_{s \in \Omega^c} (X_s) > [d_p(h_\alpha)]^{\frac{1}{2}} \right\} \rightarrow 0, \text{ as } p \rightarrow +\infty. \quad (21)$$

Next, according to formula (18),(19),(20) and (21) we have

$$\begin{aligned}
& \lim_{p \rightarrow +\infty} P \left\{ \min_{s=1, \dots, p} (X_s) > [d_p(h_\alpha)]^{\frac{1}{2}} \right\} \\
&= \lim_{p \rightarrow +\infty} P \left\{ \min \left[ \min_{s \in \Omega_1} (X_s), \min_{s \in \Omega_2} (X_s), \min_{s \in \Omega^c} (X_s) \right] > [d_p(h_\alpha)]^{\frac{1}{2}} \right\} \\
&= \lim_{p \rightarrow +\infty} P \left\{ \min_{s \in \Omega_1} (X_s) > [d_p(h_\alpha)]^{\frac{1}{2}} \right\} \times \lim_{p \rightarrow +\infty} P \left\{ \min_{s \in \Omega_2} (X_s) > [d_p(h_\alpha)]^{\frac{1}{2}} \right\} \times \\
& \quad \lim_{p \rightarrow +\infty} P \left\{ \min_{s \in \Omega^c} (X_s) > [d_p(h_\alpha)]^{\frac{1}{2}} \right\} \\
&= 1 \times 0 \times 0 \\
&= 0.
\end{aligned} \tag{22}$$

Next, according to formula (16), (17) and (18), applying the squeeze theorem, we have

$$\lim_{p \rightarrow +\infty} P \left\{ \left( \min_{s=1, \dots, p} (Z_s) \right)^2 \geq C_\alpha [2 - (\log p)^{-1}] + 2c_p \right\} = 0. \tag{23}$$

Now, according to (14),(15) and (23), we have

$$\beta_{T_4} \leq \beta_{T_5} + o(1).$$

□

**Proof of Theorem 5.**

$$\begin{aligned}
\beta_{T_5} &= P\{T_5 > C_\alpha\} \\
&= P\{-2\log(1 - e^{-\lambda_{1,p}}) - 2\log(1 - e^{-\lambda_{2,p}}) > C_\alpha\} \\
&\geq P\{-4\log(1 - e^{-\lambda_{1,p}}) > C_\alpha\} \\
&= P\left\{\log(1 - e^{-\lambda_{1,p}}) < -\frac{C_\alpha}{4}\right\} \\
&= P\left\{1 - e^{-\lambda_{1,p}} < e^{-\frac{C_\alpha}{4}}\right\} \\
&= P\left\{e^{-\lambda_{1,p}} > 1 - e^{-\frac{C_\alpha}{4}}\right\} \\
&= P\left\{-\lambda_{1,p} > \log\left(1 - e^{-\frac{C_\alpha}{4}}\right)\right\} \\
&= P\left\{\lambda_{1,p} < -\log\left(1 - e^{-\frac{C_\alpha}{4}}\right)\right\} \\
&= P\left\{\exp\left(-\frac{\left(\max_{s=1, \dots, p} (Z_s)\right)^2 - c_p}{2 - (\log p)^{-1}}\right) < -\log\left(1 - e^{-\frac{C_\alpha}{4}}\right)\right\}
\end{aligned}$$

$$\begin{aligned}
&= P \left\{ \frac{\left( \max_{s=1, \dots, p} (Z_s) \right)^2 - c_p}{2 - (\log p)^{-1}} > -\log \left( -\log \left( 1 - e^{-\frac{C_\alpha}{4}} \right) \right) \right\} \\
&= P \left\{ \left( \max_{s=1, \dots, p} (Z_s) \right)^2 > d_p(g_\alpha) \right\}, \tag{24}
\end{aligned}$$

where  $g_\alpha = -\log \left( -\log \left( 1 - e^{-\frac{C_\alpha}{4}} \right) \right) = -\log \left( -\log \left( 1 - e^{-\frac{\chi_\alpha^2(4)}{4}} \right) \right)$ .

$$\begin{aligned}
\beta_{T_2} &= P \left\{ \max_{s=1, \dots, p} (Z_s^2) - 2 \log p + \log(\log p) > C_\alpha \right\} \\
&= P \left\{ \max_{s=1, \dots, p} (Z_s^2) > C_\alpha + 2 \log p - \log(\log p) \right\} \\
&= P \left\{ \max \left[ \left( \max_{s=1, \dots, p} (Z_s) \right)^2, \left( \min_{s=1, \dots, p} (Z_s) \right)^2 \right] > C_\alpha + \log \frac{p^2}{\log p} \right\} \\
&\leq P \left\{ \left( \max_{s=1, \dots, p} (Z_s) \right)^2 > C_\alpha + \log \frac{p^2}{\log p} \right\} + \\
&\quad P \left\{ \left( \min_{s=1, \dots, p} (Z_s) \right)^2 > C_\alpha + \log \frac{p^2}{\log p} \right\}, \tag{25}
\end{aligned}$$

where  $C_\alpha = -2 \log[-\sqrt{\pi} \log(1 - \alpha)]$ .

For a fixed  $\alpha$ , we have

$$\begin{aligned}
&\lim_{p \rightarrow +\infty} C_\alpha + \log \frac{p^2}{\log p} - g_\alpha [2 - (\log p)^{-1}] - c_p \\
&= \lim_{p \rightarrow +\infty} C_\alpha - g_\alpha [2 - (\log p)^{-1}] + \log 4\pi - \frac{\log(\log p) + \log 4\pi}{2 \log p} \\
&= C_\alpha - 2g_\alpha + \log 4\pi \\
&= -2 \log[-\sqrt{\pi} \log(1 - \alpha)] + 2 \log \left( -\log \left( 1 - e^{-\frac{\chi_\alpha^2(4)}{4}} \right) \right) + \log 4\pi \\
&> 0
\end{aligned}$$

This means that when  $p \rightarrow +\infty$ ,  $C_\alpha + \log \frac{p^2}{\log p} > d_p(g_\alpha)$ .

Then when  $p \rightarrow +\infty$ , we have

$$P \left\{ \left( \max_{s=1, \dots, p} (Z_s) \right)^2 > C_\alpha + \log \frac{p^2}{\log p} \right\}$$

$$\begin{aligned}
&\leq P \left\{ \left( \max_{s=1, \dots, p} (Z_s) \right)^2 > d_p(g_\alpha) \right\} \\
&\leq P(T_5 > C_\alpha) \\
&= \beta_{T_5}
\end{aligned} \tag{26}$$

there the second inequality follow from (24).

Similarly, we can also conclude that

$$\begin{aligned}
&P \left\{ \left( \min_{s=1, \dots, p} (Z_s) \right)^2 > C_\alpha + \log \frac{p^2}{\log p} \right\} \\
&\leq P \left\{ \left( \min_{s=1, \dots, p} (Z_s) \right)^2 > d_p(g_\alpha) \right\}
\end{aligned} \tag{27}$$

Since condition C.1 holds, according to (3), we can deduce that

$$\begin{aligned}
&\lim_{p \rightarrow +\infty} P \left\{ \left( \min_{s=1, \dots, p} (Z_s) \right)^2 > d_p(g_\alpha) \right\} \\
&= 1 - \lim_{p \rightarrow +\infty} P \left\{ \left( \min_{s=1, \dots, p} (Z_s) \right)^2 \leq d_p(g_\alpha) \right\} \\
&= 1 - \lim_{p \rightarrow +\infty} P \left\{ \left( \min_{s=1, \dots, p} (X_s) \right)^2 \leq d_p(g_\alpha) \right\} \\
&= \lim_{p \rightarrow +\infty} P \left\{ \left( \min_{s=1, \dots, p} (X_s) \right)^2 > d_p(g_\alpha) \right\}.
\end{aligned} \tag{28}$$

First we recall some notations. Under alternative hypothesis  $H_1$ , denote the index set of nonzero signals by  $\Omega = \{i : 1 \leq i \leq p, \mu_i \neq 0\}$  and let the total number of nonzero signals be  $p^v$ , where the parameter  $v$  ( $0 < v < 1$ ) measures the sparsity of the nonzero mean. Similarly, denote the index set of zero signals by  $\Omega^c = \{i : 1 \leq i \leq p, \mu_i = 0\}$  and let the total number of zero signals be  $p^k$ , where  $0 < k < 1$  and  $p^v + p^k = p$ . Since non-zero signals include positive and negative, we divide  $\Omega$  into two parts, where  $\Omega_1 = \{i : 1 \leq i \leq p, \mu_i > 0\}$  represents the index set of positive non-zero signals, and let the total number of non-zero signals be  $p^{v_1}$  ( $0 < v_1 < v$ ),  $\Omega_2 = \{i : 1 \leq i \leq p, \mu_i < 0\}$  represents the index set of negative non-zero signals, and let the total number of non-zero signals be  $p^{v_2}$  ( $0 < v_2 < v$ ),  $p^{v_1} + p^{v_2} = p^v$ .

Now, we have

$$P \left\{ \left( \min_{s=1, \dots, p} (X_s) \right)^2 > d_p(g_\alpha) \right\}$$

$$\begin{aligned}
&= P \left\{ \left( \min_{s=1, \dots, p} (X_s) \right)^2 > d_p(g_\alpha) \right\} \\
&= P \left\{ \min_{s=1, \dots, p} (X_s) > [d_p(g_\alpha)]^{\frac{1}{2}} \right\} + P \left\{ \min_{s=1, \dots, p} (X_s) < -[d_p(g_\alpha)]^{\frac{1}{2}} \right\} \\
&\leq P \left\{ \min_{s=1, \dots, p} (X_s) > [d_p(g_\alpha)]^{\frac{1}{2}} \right\} \\
&= P \left\{ \min \left[ \min_{s \in \Omega_1} (X_s), \min_{s \in \Omega_2} (X_s), \min_{s \in \Omega^c} (X_s) \right] > [d_p(g_\alpha)]^{\frac{1}{2}} \right\} \\
&= P \left\{ \min_{s \in \Omega_1} (X_s) > [d_p(g_\alpha)]^{\frac{1}{2}} \right\} \times P \left\{ \min_{s \in \Omega_2} (X_s) > [d_p(g_\alpha)]^{\frac{1}{2}} \right\} \times \\
&\quad P \left\{ \min_{s \in \Omega^c} (X_s) > [d_p(g_\alpha)]^{\frac{1}{2}} \right\}. \tag{29}
\end{aligned}$$

The penultimate equation is from is obtained under the alternative hypothesis  $H_1$ .

We first prove the limit of  $P \left\{ \min_{s \in \Omega_1} (X_s) > [d_p(g_\alpha)]^{\frac{1}{2}} \right\} \rightarrow 1$  when  $p \rightarrow +\infty$ , then, by formula (1), we have

$$\begin{aligned}
&P \left\{ \min_{s \in \Omega_1} (X_s) > [d_p(g_\alpha)]^{\frac{1}{2}} \right\} \\
&= P \left\{ \min_{s \in \Omega_1} (X_s - \mu_s) > [d_p(g_\alpha)]^{\frac{1}{2}} - \mu_s \right\} \\
&\geq P \left\{ \min_{s \in \Omega_1} (X_s - \mu_s) > [d_p(g_\alpha)]^{\frac{1}{2}} - \log p \right\} \\
&= P \left\{ a_{p^{v_1}} \left[ \min_{s \in \Omega_1} (X_s - \mu_s) + b_{p^{v_1}} \right] > a_{p^{v_1}} \left[ (d_p(g_\alpha))^{\frac{1}{2}} - \log p + b_{p^{v_1}} \right] \right\} \\
&\rightarrow \exp \left\{ -\exp \left\{ a_{p^{v_1}} \left[ (d_p(g_\alpha))^{\frac{1}{2}} - \log p + b_{p^{v_1}} \right] \right\} \right\},
\end{aligned}$$

where  $a_{p^{v_1}} = (2 \log p^{v_1})^{1/2}$ ,  $b_{p^{v_1}} = (2 \log p^{v_1})^{1/2} - \frac{1}{2}(2 \log p^{v_1})^{-1/2}(\log \log p^{v_1} + \log 4\pi)$ ,  $c_p = 2 \log(p) - [\log(\log p) + \log(4\pi)] + \frac{\log(\log p) + \log(4\pi)}{2 \log(p)}$ .

Since  $0 < v_1 < v < 1 - \frac{1}{p^{1/2} \log p}$ , when  $p \rightarrow +\infty$ , it is obvious that

$$a_{p^{v_1}} \left[ (d_p(g_\alpha))^{\frac{1}{2}} - \log p + b_{p^{v_1}} \right] = O \left( -\sqrt{2v_1} (\log p)^{\frac{3}{2}} \right) \rightarrow -\infty,$$

which means that

$$\exp \left\{ -\exp \left\{ a_{p^{v_1}} \left[ (d_p(g_\alpha))^{\frac{1}{2}} - \log p + b_{p^{v_1}} \right] \right\} \right\} \rightarrow 1, \text{ as } p \rightarrow +\infty.$$

So, we have

$$P \left\{ \min_{s \in \Omega_1} (X_s) > [d_p(g_\alpha)]^{\frac{1}{2}} \right\} \rightarrow 1, \text{ as } p \rightarrow +\infty. \quad (30)$$

Secondly, we prove that  $P \left\{ \min_{s \in \Omega_2} (X_s) > [d_p(g_\alpha)]^{\frac{1}{2}} \right\} \rightarrow 0$  as  $p \rightarrow +\infty$ , then, by formula (1), we have

$$\begin{aligned} 0 &\leq P \left\{ \min_{s \in \Omega_2} (X_s) > [d_p(g_\alpha)]^{\frac{1}{2}} \right\} \\ &= P \left\{ \min_{s \in \Omega_2} (X_s - \mu_s) > [d_p(g_\alpha)]^{\frac{1}{2}} - \mu_s \right\} \\ &\leq P \left\{ \min_{s \in \Omega_2} (X_s - \mu_s) > [d_p(g_\alpha)]^{\frac{1}{2}} + \log p \right\} \\ &= P \left\{ a_{p^{v_2}} \left[ \min_{s \in \Omega_2} (X_s - \mu_s) + b_{p^{v_2}} \right] > a_{p^{v_2}} \left[ (d_p(g_\alpha))^{\frac{1}{2}} + \log p + b_{p^{v_2}} \right] \right\} \\ &\rightarrow \exp \left\{ -\exp \left\{ a_{p^{v_2}} \left[ (d_p(g_\alpha))^{\frac{1}{2}} + \log p + b_{p^{v_2}} \right] \right\} \right\}, \end{aligned}$$

where  $a_{p^{v_2}} = (2 \log p^{v_2})^{1/2}$ ,  $b_{p^{v_2}} = (2 \log p^{v_2})^{1/2} - \frac{1}{2}(2 \log p^{v_2})^{-1/2}(\log \log p^{v_2} + \log 4\pi)$ ,  $c_p = 2 \log(p) - [\log(\log p) + \log(4\pi)] + \frac{\log(\log p) + \log(4\pi)}{2 \log(p)}$ .

Since  $0 < v_2 < v < 1 - \frac{1}{p^{1/2} \log p}$ , when  $p \rightarrow +\infty$ , it is obvious that

$$a_{p^{v_2}} \left[ (d_p(g_\alpha))^{\frac{1}{2}} + \log p + b_{p^{v_2}} \right] = O \left( \sqrt{2v_2} (\log p)^{\frac{3}{2}} \right) \rightarrow +\infty,$$

which means that

$$\exp \left\{ -\exp \left\{ a_{p^{v_2}} \left[ (d_p(g_\alpha))^{\frac{1}{2}} + \log p + b_{p^{v_2}} \right] \right\} \right\} \rightarrow 0, \text{ as } p \rightarrow +\infty.$$

So, we have

$$P \left\{ \min_{s \in \Omega_2} (X_s) > [d_p(g_\alpha)]^{\frac{1}{2}} \right\} \rightarrow 0, \text{ as } p \rightarrow +\infty. \quad (31)$$

Finally, we prove the limit of  $P \left\{ \min_{s \in \Omega^c} (X_s) > [d_p(g_\alpha)]^{\frac{1}{2}} \right\} \rightarrow 0$  when  $p \rightarrow +\infty$ . By formula (1), we have

$$\begin{aligned} &P \left\{ \min_{s \in \Omega^c} (X_s) > [d_p(g_\alpha)]^{\frac{1}{2}} \right\} \\ &= P \left\{ a_{p^k} \left[ \min_{s \in \Omega^c} (X_s) + b_{p^k} \right] > a_{p^k} \left[ (d_p(g_\alpha))^{\frac{1}{2}} + b_{p^k} \right] \right\} \\ &\rightarrow \exp \left\{ -\exp \left\{ a_{p^k} \left[ (d_p(g_\alpha))^{\frac{1}{2}} + b_{p^k} \right] \right\} \right\}, \end{aligned}$$

where  $a_{p^k} = (2 \log p^k)^{1/2}$ ,  $b_{p^k} = (2 \log p^k)^{1/2} - \frac{1}{2}(2 \log p^k)^{-1/2}(\log \log p^k + \log 4\pi)$ ,  
 $c_p = 2 \log(p) - [\log(\log p) + \log(4\pi)] + \frac{\log(\log p) + \log(4\pi)}{2 \log(p)}$ .

Since  $0 < k < 1$ , it is obvious that

$$a_{p^k} \left[ (d_p(g_\alpha))^{\frac{1}{2}} + b_{p^k} \right] = O \left( 2\sqrt{k} \log p \right) \rightarrow +\infty, \text{ as } p \rightarrow +\infty.$$

which means that

$$\exp \left\{ -\exp \left\{ a_{p^k} \left[ (d_p(g_\alpha))^{\frac{1}{2}} + b_{p^k} \right] \right\} \right\} \rightarrow 0, \text{ as } p \rightarrow +\infty.$$

So, we have

$$P \left\{ \max_{s \in \Omega^c} (X_s) > [d_p(g_\alpha)]^{\frac{1}{2}} \right\} \rightarrow 0, \text{ as } p \rightarrow +\infty. \quad (32)$$

Next, according to formula (29),(30),(31) and (32) we have

$$\begin{aligned} & \lim_{p \rightarrow +\infty} P \left\{ \min_{s=1, \dots, p} (X_s) > [d_p(g_\alpha)]^{\frac{1}{2}} \right\} \\ &= \lim_{p \rightarrow +\infty} P \left\{ \min \left[ \min_{s \in \Omega_1} (X_s), \min_{s \in \Omega_2} (X_s), \min_{s \in \Omega^c} (X_s) \right] > [d_p(g_\alpha)]^{\frac{1}{2}} \right\} \\ &= \lim_{p \rightarrow +\infty} P \left\{ \min_{s \in \Omega_1} (X_s) > [d_p(g_\alpha)]^{\frac{1}{2}} \right\} \times \lim_{p \rightarrow +\infty} P \left\{ \min_{s \in \Omega_2} (X_s) > [d_p(g_\alpha)]^{\frac{1}{2}} \right\} \times \\ & \quad \lim_{p \rightarrow +\infty} P \left\{ \min_{s \in \Omega^c} (X_s) > [d_p(g_\alpha)]^{\frac{1}{2}} \right\} \\ &= 1 \times 0 \times 0 \\ &= 0. \end{aligned} \quad (33)$$

Next, according to formula (27), (28),(29)and (33),applying the squeeze theorem, we have

$$\lim_{p \rightarrow +\infty} P \left\{ \left( \min_{s=1, \dots, p} (Z_s) \right)^2 \geq C_\alpha + \log \frac{p^2}{\log p} \right\} = 0. \quad (34)$$

Now, according to (25),(26) and (34),we have

$$\beta_{T_2} \leq \beta_{T_5} + o(1).$$

□

## References

- [1] Li, Z., Qin, S., Li, Q.: A novel test by combining the maximum and minimum values among a large number of dependent z-scores with application to genome wide association study. *Statistics in Medicine* **40**(10), 2422–2434 (2021)



- [2] Leadbetter, M.R., Lindgren, G., Rootzén, H.: Extremes and Related Properties of Random Sequences and Processes. Springer,
- [3] Fisher, R.A., et al.: Statistical methods for research workers. Statistical methods for research workers. (6th Ed) (1936)
