# Supplementary material for: An integration test based only on the maximum and minimum Z-scores for meta analysis
Source: Research Square preprint supplement (doi:10.21203/rs.3.rs-3931249/v1), 2024-02-13
Supplement: Supplementary file 1 [file efd25a1641abf133315e4b3a.xlsx]

## Sheet: HDL
	V1	V2	V3	V4	V5	V6	V7	V8	V9	V10
1444350	rs2740816	t	c	99896	1.066	0.2862	+	+---+--++--+++-++-+-+---+	0.0026	0.0058
1444351	rs2740817	t	c	99900	1.091	0.2753	+	+---++-++--+++-++-+-+---+	0.0025	0.0058
1444352	rs274082	t	c	98409	1.614	0.1066	+	-++++++++-++-+----++--+++	0.01	0.0056
1444353	rs2740822	t	c	99894	1.356	0.1753	+	+----+-++-+--+++---++--++	0.0052	0.0049
1444354	rs2740823	a	t	99900	-0.839	0.4016	-	++--+-++-+----++--++-++--	-0.0038	0.0077
1444355	rs2740824	c	g	99830	-0.667	0.5046	-	++--+-++-+----++--++-++-+	-0.003	0.0077
1444356	rs2740825	t	c	99867	-1.145	0.2521	-	-+-++-+--+-++---+++--++--	-0.0041	0.0049
1444357	rs2740829	a	t	99900	-0.789	0.4302	-	++--+-++++----++--++-++-+	-0.0034	0.0078
1444358	rs2740830	a	g	99900	-0.609	0.5422	-	++--+-++-++---++--++-++--	-0.0021	0.0078
1444359	rs2740834	a	c	99900	-1.436	0.151	-	-+--+-+--+--+---+++--++--	-0.0055	0.0049
1444360	rs274084	t	c	98409	1.61	0.1075	+	-++++++++-++-+----++--+++	0.0101	0.0056
1444361	rs2740841	t	c	99864	-0.618	0.5367	-	++--+-+++++---++--++-++--	-0.0019	0.0078
1444362	rs2740843	t	c	99900	-1.347	0.1779	-	-+--+-+--+--+---+++--++--	-0.0051	0.0049
1444363	rs2740846	c	g	94091	-1.245	0.2132	-	-++---+--++--+??---+-+++?	-0.0088	0.0097
1444364	rs2740847	t	c	99900	-1.355	0.1755	-	-+--+-+--+--+---+++--++--	-0.0051	0.0049
1444365	rs274085	c	g	98409	1.638	0.1014	+	-++++++++-++-+----++--+++	0.01	0.0057
1444366	rs2740851	t	c	99900	-1.413	0.1578	-	-+--+-+--+--+---+++--++--	-0.0054	0.0049
1444367	rs2740852	c	g	99736	-1.363	0.1729	-	-+-+--+--++-----++-++++++	-0.0055	0.0062
1444368	rs2740853	a	g	99900	-0.555	0.5787	-	-+--+-++-+----++--++-++--	-0.0014	0.008
1444369	rs2740854	t	c	99900	-0.532	0.595	-	-+--+-++-+----++--++-++--	-0.0011	0.008
1444370	rs2740857	a	c	99900	0.683	0.4947	+	++++-+--+-++++--++-----++	0.0018	0.0071
1444371	rs2740858	a	t	99900	1.785	0.07418	+	---+++-++--++----++++++-+	0.0074	0.0055
1444372	rs2740859	a	g	99900	1.538	0.1241	+	---+++-++--++----++++++--	0.0065	0.0055
1444373	rs274086	t	c	98409	-2.498	0.01247	-	+--------++-+-++++--++---	-0.0154	0.0058
1444374	rs2740860	a	c	99900	0.49	0.6239	+	++++-+----++++--++-----++	7e-04	0.0071
1444375	rs2740861	t	c	99895	-0.594	0.5523	-	----+-++++----++--+++++--	-0.0013	0.0071
1444376	rs2740862	a	g	99825	0.491	0.6233	+	-+++++++-+++-----++++++--	0.004	0.0049
1444377	rs2740863	t	c	99900	-0.433	0.665	-	----+-++++----++--+-+++-+	3e-04	0.0076
1444378	rs2740865	a	g	95716	-2.844	0.00446	-	-++---+--++---++--?--+++-	-0.0141	0.0061
1444379	rs2740866	a	g	99900	1.013	0.3111	+	+-+++--++--++--+--++++--+	0.0024	0.0058
1444380	rs2740868	t	c	99900	1.313	0.1891	+	+--++-++-++++++-----+---+	0.0113	0.008
1444381	rs2740870	t	c	10198	-0.356	0.7221	-	?????????????+??????--???	-0.0083	0.0183
1444382	rs2740873	a	c	99144	0.612	0.5404	+	-+-+-----+--+--+++++-+++?	6e-04	0.0069
1444383	rs2740878	t	c	99900	0.695	0.4871	+	---+-+-+-+---+-++++-+-+++	0.003	0.0051
1444384	rs274088	a	c	98409	-1.545	0.1223	-	+--------++-+-++++--++---	-0.0094	0.0057
1444385	rs2740881	a	g	99900	-1.523	0.1278	-	+++-------+---+----+-+---	-0.0129	0.007
1444386	rs2740882	a	g	1940	-0.309	0.7575	-	??????????????-??????????	-0.0137	0.0442
1444387	rs2740883	a	g	99900	-0.784	0.4329	-	+++++-+---+++-+----+-+---	-0.0041	0.0051
1444388	rs2740884	a	g	99900	-1.546	0.1222	-	++++------+---+----+-+---	-0.0127	0.0069
1444389	rs2740885	t	g	99900	-0.749	0.4538	-	++++--+---+++-+----+-+---	-0.0041	0.0051
1444390	rs2740889	a	c	96908	1.408	0.1592	+	----++++++-+++-++++-+-+?+	0.0123	0.007
1444391	rs2740891	t	c	96908	1.427	0.1535	+	----++++++-+++-++++++-+?+	0.0125	0.007
1444392	rs2740892	a	g	96908	-1.332	0.1829	-	++++------+---+------+-?-	-0.0119	0.007
1444393	rs2740893	a	g	96908	1.299	0.1938	+	----++++++-+++-++++++-+?+	0.0117	0.007
1444394	rs2740894	a	c	99900	1.406	0.1597	+	---+++-+++-+++-++++++-+++	0.0112	0.007
1444395	rs2740895	a	g	99898	-1.105	0.2691	-	++++--+---+++-+----++++--	-0.0055	0.0051
1444396	rs2740897	c	g	99900	-1.33	0.1834	-	++----+---+-+-----++---+-	-0.0094	0.006
1444397	rs2740898	a	c	95716	0.979	0.3275	+	-+--++-+++---+-+++?-+-+++	0.0052	0.0051
1444398	rs2740899	a	g	99900	1.47	0.1414	+	-+--++++++---+-++++-+-+++	0.0078	0.0051
1444399	rs27409	t	c	96901	0.551	0.5815	+	--+-++-+++-+--++---++--?-	0.0034	0.0051
1444400	rs2740902	t	g	99900	-0.567	0.5707	-	+++++-+---+++-+----+-+---	-0.0026	0.0056
1444401	rs2740903	t	c	99900	-1.824	0.06823	-	++++------+---+---+--++--	-0.0155	0.0074
1444402	rs2740906	t	c	39307	-0.392	0.6949	-	?+-?+---+-??+-??---+??-+?	-0.0061	0.0084
1444403	rs2740909	t	c	99900	1.438	0.1503	+	----++++++-+++-+++-++--++	0.0125	0.0073
1444404	rs2740910	a	g	99900	0.57	0.5686	+	+-+---+--+++++-+-+-+--+++	0.0027	0.0054
1444405	rs2740911	a	g	99900	0.757	0.4492	+	-+-+-+++++++-----+-++-+++	0.0087	0.007
1444406	rs2740912	a	c	2440	0.198	0.8432	+	????????????????????+-???	0.0066	0.0344
1444407	rs2740914	t	c	99900	0.612	0.5406	+	-+-++--+--+++-++-++--+++-	9e-04	0.0055
1444408	rs2740917	a	c	94091	-0.449	0.6533	-	+----+++-++---??-+----+-?	-0.007	0.0133
1444409	rs2740920	t	c	35862	0.703	0.4821	+	+??-??????+??+?+????--???	0.0047	0.01
1444410	rs2740921	t	c	10220	0.727	0.4675	+	?????????????+??????++???	0.0155	0.0193
1444411	rs2740923	c	g	99900	0.652	0.5145	+	++-+++-+++-++-+----++--++	0.0029	0.005
1444412	rs2740924	t	c	99900	0.73	0.4652	+	++-+++-+---+--+-+-++-+-+-	0.0024	0.005
1444413	rs2740925	c	g	99900	-0.792	0.4282	-	--+---+---+--+-+++---++-+	-0.0033	0.005
1444414	rs2740927	a	g	99900	-0.82	0.412	-	--++-+------++-+-----++++	-0.0048	0.0054
1444415	rs2740928	c	g	99900	-0.749	0.4541	-	--+---+---+-++-+++--+++--	-0.0027	0.005
1444416	rs2740929	a	g	99900	-0.452	0.6512	-	+-+-------+-+--++-+--++++	-0.0045	0.0049
1444417	rs2740930	a	c	99878	-0.371	0.7108	-	+-+-------+-+--++-+--++++	-0.0041	0.0049
1444418	rs2740931	a	g	99891	-0.394	0.6936	-	+-+-------+-+--++-+--++++	-0.0042	0.0049
1444419	rs2740932	c	g	99900	0.589	0.5559	+	++--+-++++-+-++-+++++---+	0.0036	0.0051
1444420	rs2740933	t	c	99900	1.007	0.3138	+	++--+-+++--+-++-+++++----	0.0051	0.0054
1444421	rs2740935	a	t	99900	-0.935	0.3496	-	--++-+---++-++-+-----+++-	-0.0049	0.0055
1444422	rs2740937	a	g	99851	-0.973	0.3304	-	--+---+---+-++-+++---++-+	-0.0036	0.005
1444423	rs2740939	t	g	99900	-0.597	0.5503	-	+++---------+--++--+-++++	-0.0047	0.0049
1444424	rs274094	a	g	98401	-1.687	0.09162	-	+---------+-+-++++--++---	-0.0101	0.0057
1444425	rs2740940	t	c	99900	1.089	0.2764	+	-+-+++-+++-++-+-+-+++----	0.005	0.005
1444426	rs2740941	a	g	99900	0.994	0.3201	+	+--+++-+++-++-+-+-+----+-	0.0037	0.005
1444427	rs2740942	t	c	99900	0.999	0.3178	+	+--+++-+++-++-+-+-+----+-	0.0037	0.005
1444428	rs2740943	a	g	99897	1.124	0.2612	+	+--+++-+++-++-+-+-+-+--+-	0.0043	0.005
1444429	rs2740945	t	g	99900	-1.162	0.2453	-	--+---+---+--+-+-+-+-++-+	-0.0044	0.005
1444430	rs2740946	t	c	99900	1.133	0.2573	+	++-+++-+++-++-+-+-+-+--+-	0.0042	0.005
1444431	rs2740947	t	g	96837	-1.176	0.2395	-	--+---+---+--+-+-+-+-++?+	-0.0044	0.005
1444432	rs2740948	c	g	96908	-1.216	0.2241	-	--+---+---+--+-+-+-+-++?-	-0.0046	0.005
1444433	rs2740950	a	t	96806	-1.224	0.2211	-	--+---+------+-+++-+-++?-	-0.0048	0.005
1444434	rs2740951	a	g	99900	1.198	0.2309	+	+--+++-+++-++-+-+-+-+--+-	0.0046	0.005
1444435	rs2740952	t	c	99884	-1.649	0.0992	-	--+---+-+++--+------+-+-+	-0.0046	0.005
1444436	rs2740953	a	g	99863	1.714	0.08655	+	++-+++-+---++-++++++-+-+-	0.0048	0.005
1444437	rs2740954	a	t	99900	0.92	0.3574	+	-+-+-++++-++--+-+-++-+--+	0.006	0.0058
1444438	rs2740955	t	c	38542	-0.053	0.958	-	-??+??????-??-+-????+-??-	-5e-04	0.0085
1444439	rs2740956	c	g	99900	1.653	0.09839	+	++-+++-+---+--++++++-+-++	0.005	0.005
1444440	rs2740957	t	c	99900	-1.663	0.09623	-	--+---+-+++--+------+-+-+	-0.0051	0.0051
1444441	rs2740962	t	c	99900	1.403	0.1605	+	++-+++-+-+-++-+-+-++-+-+-	0.0045	0.005
1444442	rs2740963	a	g	99900	-1.579	0.1143	-	--+---+++++--+------+-+-+	-0.0048	0.0051
1444443	rs2740964	a	g	99840	-1.337	0.1813	-	-++---+---+----+-+-+-++-+	-0.0061	0.0052
1444444	rs2740968	t	g	99900	1.769	0.07698	+	++-+++-++--++-++++++-+-+-	0.0056	0.0051
1444445	rs2740969	c	g	99900	1.709	0.08753	+	++-+++-----++-++++++-+-++	0.0052	0.0051
1444446	rs274097	a	g	98203	-1.635	0.102	-	+--------++-+-++++--++---	-0.0099	0.0057
1444447	rs2740972	t	c	99900	1.522	0.128	+	++-+++-----++--+++++-+-+-	0.0037	0.0053
1444448	rs2740973	a	c	96781	-1.388	0.1651	-	+-+-+----++----?-+-+-++-+	-0.0074	0.0055
1444449	rs274098	t	c	98409	1.758	0.07879	+	-+++++++++-+-+----++--+++	0.0106	0.0057
1444450	rs2740982	t	c	98406	-1.285	0.199	-	-++--+--++--++-+--+-+-+-+	-0.0063	0.0071
1444451	rs2740983	a	t	98406	-0.366	0.7141	-	-+++-++-+-+-+-----+-+++-+	-1e-04	0.0064
1444452	rs2740985	t	c	98406	-0.078	0.9379	-	-+++-++-+-+++-----+-+++-+	0.0026	0.0066
1444453	rs2740987	a	g	9744	0.859	0.3903	+	?????????????+-??????????	0.0192	0.026
1444454	rs2740989	t	c	98406	0.674	0.5001	+	-++--+--+-+++-++--+-++-+-	0.003	0.0072
1444455	rs2740991	a	g	9744	-0.339	0.7346	-	?????????????+-??????????	-0.0182	0.0265
1444456	rs2740993	a	g	98406	1.524	0.1274	+	-++++++---+++----+++-+-+-	0.0133	0.0095
1444457	rs2740994	t	c	98406	1.684	0.09225	+	-++++++---+++----+++-+-+-	0.0147	0.0095
1444458	rs2741	t	g	99900	0.745	0.4562	+	++----+++--++-++---+-+++-	0.006	0.0083
1444459	rs27410	c	g	99900	-1.913	0.05576	-	+-++----+-------+++++++-+	-0.0105	0.0049
1444460	rs2741000	t	c	98409	-0.095	0.9247	-	++-+--+++++++------+-+-+-	1e-04	0.0051
1444461	rs2741012	t	c	9747	0.473	0.6363	+	?????????????+-??????????	0.0089	0.0177
1444462	rs2741013	t	c	7807	0.487	0.6264	+	?????????????+???????????	0.0095	0.0195
1444463	rs2741019	c	g	99892	-0.833	0.4047	-	+-+++----------++-+-+-+-+	-0.0067	0.0054
1444464	rs2741021	t	c	99828	0.871	0.3837	+	-+---++++++++++--+-+-+-+-	0.0068	0.0054
1444465	rs2741022	t	c	7807	0.423	0.6724	+	?????????????+???????????	0.0082	0.0194
1444466	rs2741023	a	g	18269	1.438	0.1506	+	??????+?+++??++?????-+???	0.0137	0.0095
1444467	rs2741027	a	g	99892	0.925	0.3551	+	-+---++++++++++--+-+-+-+-	0.007	0.0053
1444468	rs2741028	a	g	99892	0.903	0.3665	+	-+---++++++++++--+-+-+-+-	0.007	0.0054
1444469	rs2741029	t	g	98250	-0.804	0.4215	-	+-+++-------?--++-+-+-+-+	-0.0066	0.0055
1444470	rs274103	a	g	98409	-1.425	0.154	-	-+--+++--+----+++--+-++--	-0.0054	0.0052
1444471	rs2741030	t	c	7807	0.396	0.6921	+	?????????????+???????????	0.0077	0.0194
1444472	rs2741031	t	c	99892	0.902	0.3673	+	--+++++--+++--++-++----+-	0.0051	0.006
1444473	rs2741034	a	g	98152	-0.695	0.4871	-	+-+++-------?--++-+-+-+++	-0.0055	0.0054
1444474	rs2741035	a	g	9747	0.362	0.7176	+	?????????????++??????????	0.0064	0.0184
1444475	rs2741036	a	g	99892	0.939	0.3475	+	-+---++++++++++--+-+-+---	0.0069	0.0053
1444476	rs2741038	a	g	99892	0.912	0.3617	+	-----++++++++++--+-+-+---	0.0067	0.0053
1444477	rs2741042	t	c	99892	0.905	0.3655	+	-----++++++++++--+-+-+---	0.0067	0.0053
1444478	rs2741043	a	g	99892	-0.929	0.3527	-	++-----++---++--+--++++-+	-0.0052	0.0061
1444479	rs2741044	a	g	7807	0.702	0.4827	+	?????????????+???????????	0.0134	0.0189
1444480	rs2741045	t	c	98151	0.611	0.541	+	---+--++++++?++--+---+++-	0.0055	0.0053
1444481	rs2741046	t	c	99892	-0.769	0.4419	-	+++-++-------+-++-+++---+	-0.0062	0.0053
1444482	rs2741047	a	t	99892	0.453	0.6506	+	+++--+---+-+-++++--++--++	0.001	0.005
1444483	rs2741048	a	c	99892	-0.401	0.6881	-	---++-+++-+-+----++--++--	-8e-04	0.005
1444484	rs2741049	t	c	99892	0.367	0.7137	+	+++--+---+-+-++++--++--++	7e-04	0.005
1444485	rs2741056	a	c	10205	1.605	0.1084	+	?????????????+??????++???	0.0304	0.0171
1444486	rs2741061	c	g	99875	0.765	0.4442	+	---+++--+--+-+-+--+--+---	0.003	0.005
1444487	rs274107	t	c	98409	-1.656	0.0977	-	+--------++-+-+++--++----	-0.0097	0.0062
1444488	rs2741071	t	c	7807	0.224	0.8227	+	?????????????+???????????	0.0055	0.0246
1444489	rs2741073	a	g	99097	-1.115	0.265	-	---+---++--+--++--+--++-?	-0.007	0.006
1444490	rs2741075	t	c	99900	0.96	0.3372	+	++-++++-+--+++--+--++-+-+	0.0049	0.006
1444491	rs2741079	a	g	99900	0.543	0.5875	+	+--+++--+--+-++------++-+	0.0022	0.005
1444492	rs274108	a	g	98409	0.632	0.5272	+	+-+-+--++---+++-++-++--++	0.0023	0.0051
1444493	rs2741083	t	c	40733	0.909	0.3632	+	?++-?-+--+-???????+?-+++?	0.0079	0.0079
1444494	rs2741084	a	g	7807	-0.477	0.6335	-	?????????????-???????????	-0.0092	0.0194
1444495	rs2741087	t	c	38180	-0.264	0.7919	-	?+--??+++--???????+?-++-?	8e-04	0.0084
1444496	rs274109	a	g	89166	1.01	0.3127	+	++++-+++---+++??--?--++--	0.0174	0.0177
1444497	rs2741098	t	c	96903	1.65	0.09891	+	++--++-+-+++-++-++-+++-?+	0.0078	0.0049
1444498	rs2741101	t	c	88452	0.411	0.6814	+	--?+++---+--++-+--?+----+	0.0038	0.0108
1444499	rs2741103	t	c	95716	1.433	0.152	+	+---++-+++++-+--++?++--+-	0.0063	0.0056
1444500	rs2741105	c	g	95716	2.621	0.008772	+	+---+++++++++++-++?+++++-	0.0141	0.0055
1444501	rs2741108	t	c	99899	0.136	0.8919	+	+-+---+--++---++-+++--+0+	5e-04	0.005
1444502	rs2741109	a	g	99812	0.748	0.4545	+	+----++--++-+-+-+++++--+-	0.0044	0.0054
1444503	rs2741110	t	c	99880	-1.221	0.2221	-	--+++---+--+-+-+-----++-+	-0.0071	0.0054
1444504	rs2741111	a	c	99900	0.408	0.6836	+	+++---+--++-+-++-+++--+++	0.0016	0.0051
1444505	rs2741112	c	g	99900	-0.353	0.7243	-	+-+---+---+---++-+++-----	-0.0014	0.005
1444506	rs2741115	c	g	99875	-1.195	0.2322	-	-++++--++--+---++----++-+	-0.0059	0.0053
1444507	rs2741117	t	g	99900	-0.659	0.51	-	+-+---+---+---++-+++-----	-0.0025	0.005
1444508	rs2741118	c	g	99811	1.166	0.2436	+	+----++--++-++++-++++--+-	0.006	0.0053
1444509	rs2741120	t	c	99900	-0.408	0.6831	-	+-+---+---+---++-+++-----	-0.0018	0.005
1444510	rs2741121	t	c	99900	0.518	0.6042	+	-+-+++-+++-+++--+---+++++	0.0023	0.005
1444511	rs2741122	t	g	7807	0.362	0.7172	+	?????????????+???????????	0.0089	0.0245
1444512	rs2741125	a	g	99900	-0.502	0.6155	-	+-+---+---+---++-+++-----	-0.0022	0.005
1444513	rs2741127	a	g	99900	1.145	0.2522	+	+----++--++-+++++++++--+-	0.0061	0.0053
1444514	rs2741129	a	g	99900	1.351	0.1769	+	+----++--++-+++++++++--+-	0.0066	0.0053
1444515	rs2741131	t	c	8577	1.033	0.3016	+	??????-?--+?????????++???	0.0249	0.0424
1444516	rs2741134	a	g	36612	0.6	0.5486	+	+??-??????+??+?-????+-??+	0.0022	0.0096
1444517	rs2741136	a	g	99899	1.778	0.07547	+	+---++-+-++++++-+--+++-++	0.0073	0.0054
1444518	rs2741137	a	g	99872	0.985	0.3247	+	+----++--++-+++-+++++--++	0.0041	0.0052
1444519	rs2741143	a	g	99900	-1.464	0.1431	-	-+++--+-+------+-++--++--	-0.0059	0.0052
1444520	rs2741144	a	g	94841	0.104	0.9172	+	+++--++--++--+??-+-+---+-	0.0014	0.007
1444521	rs274115	a	g	98409	0.699	0.4847	+	-+++--+++--++++----+-+---	0.0079	0.0073
1444522	rs2741158	a	g	99801	-1.524	0.1276	-	++---+--+-+--+--+++----+-	-0.0091	0.0049
1444523	rs2741159	a	c	99776	-0.844	0.3986	-	++--++--+---------+---++-	-0.0062	0.005
1444524	rs2741172	t	g	98409	0.973	0.3306	+	-++-+-----++-+--+-+++-+--	0.004	0.0051
1444525	rs2741173	a	g	98409	-0.466	0.6415	-	+--+-+++++--+--+-+-++--++	-0.0022	0.0056
1444526	rs2741175	t	c	98409	-0.747	0.4548	-	+--+-+++++--+-++-+---+-++	-0.0029	0.0051
1444527	rs2741176	t	c	98409	-0.948	0.343	-	+---+++++++-+-++-+-----++	-0.004	0.0054
1444528	rs2741182	c	g	96903	-1.278	0.2013	-	+++-+--++-+---++-----+-?-	-0.0077	0.0058
1444529	rs2741186	a	g	98409	-0.779	0.4361	-	+-+----++++-+-++-+++-+-+-	-0.0052	0.0049
1444530	rs2741189	c	g	98409	1.031	0.3025	+	++-+--+-++-+-+---++++-+--	0.0067	0.006
1444531	rs274119	a	g	99900	2.214	0.02683	+	++-+-+++-++++-++++--+-+-+	0.012	0.0054
1444532	rs2741193	a	g	99900	0.337	0.7364	+	-+-+-+++++--++---++-+++-+	0.0021	0.0051
1444533	rs2741194	a	g	99900	-0.066	0.9477	-	-+--++---++++--+-+-+--++-	-6e-04	0.0074
1444534	rs2741199	c	g	99900	0.04	0.9682	+	-++--++-------+++-+-+++++	0.0014	0.0054
1444535	rs27412	a	g	96897	0.588	0.5563	+	--+-++-+++-+--++---++--?-	0.0036	0.0051
1444536	rs2741200	t	c	99900	1.679	0.0932	+	-+-+++-+++-+++-+-++++++-+	0.0088	0.0054
1444537	rs2741202	t	c	99896	0.077	0.9383	+	-++--++-------+++-+-+++++	0.0017	0.0054
1444538	rs2741204	c	g	99900	0.02	0.9839	+	+---+--+++++++---+-+-----	-9e-04	0.0054
1444539	rs2741205	a	g	96859	0.136	0.8918	+	+--++--+++++++---+-+---?-	-5e-04	0.0055
1444540	rs2741206	a	c	99900	0.152	0.8795	+	+--++--+++++++---+-+-----	-2e-04	0.0054
1444541	rs2741207	a	c	99900	0.697	0.4856	+	++----+----++-+-++--+++++	0.0034	0.005
1444542	rs2741208	t	g	99900	1.233	0.2176	+	-+-+-+++++-+---+--+++++-+	0.0066	0.0049
1444543	rs2741209	a	g	99900	-0.258	0.796	-	-++-++---+--++-+-+++-+--+	-0.0013	0.006
1444544	rs2741210	a	g	99900	-0.381	0.7035	-	-++-++---+--++-+--++-+--+	-0.0023	0.006
1444545	rs2741211	a	g	99900	1.254	0.2098	+	-+-+-+++++-+---+--+++++-+	0.0066	0.0049
1444546	rs2741214	c	g	99900	0.738	0.4604	+	++----+----++-+-++--+++++	0.0035	0.005
1444547	rs2741215	t	c	99900	0.704	0.4815	+	++-+--+----++-+-++--+++++	0.0033	0.005
1444548	rs2741216	t	c	99866	-0.739	0.4601	-	--++++-++++--+-+--++-----	-0.0035	0.005
1444549	rs2741217	t	c	99849	-0.729	0.4662	-	--++++-++++--+-+--++-----	-0.0035	0.005
1444550	rs2741218	a	c	99889	0.658	0.5106	+	++----+----++-+-++--++-++	0.0033	0.0049
1444551	rs2741221	a	g	99900	0.62	0.5353	+	++++--+++-+--+-+--+++-+--	0.0024	0.0053
1444552	rs2741222	t	c	99900	0.588	0.5562	+	++-+--+--+-++-+--+--+++++	0.0027	0.005
1444553	rs2741223	c	g	99900	0.582	0.5606	+	++++--+++-+--+-+--+++-+--	0.0024	0.0054
1444554	rs2741225	a	c	99900	0.674	0.5002	+	++----+----++-+-++--+++++	0.0032	0.005
1444555	rs2741228	t	c	96898	-0.941	0.3467	-	+----+--+--++-++++---++?+	-0.0052	0.006
1444556	rs2741229	c	g	99900	0.761	0.4469	+	++----+----++-+-++--+++++	0.0036	0.005
1444557	rs274124	a	g	99900	-0.662	0.5077	-	-+--+++-----+-++-++--+-+-	-0.0043	0.0081
1444558	rs274127	c	g	29411	-0.085	0.9326	-	????-????????+?-?-?????+?	-0.0056	0.035
1444559	rs2741270	t	c	99892	0.751	0.4527	+	+-+-++++-+++++--++---+--+	0.0078	0.0079
1444560	rs2741271	t	g	88578	0.087	0.9306	+	+++?--+--+++---+--?++--++	0.001	0.0058
1444561	rs2741275	a	g	10249	-0.433	0.6647	-	?????????????+??????-+???	-0.0169	0.0297
1444562	rs2741277	a	c	92762	-0.252	0.8009	-	-+-?+-+--+-+-+++----+---+	-0.0011	0.0053
1444563	rs2741278	c	g	29482	-1.103	0.2702	-	+?????????-??-?-????++??-	-0.0142	0.0118
1444564	rs2741279	t	g	92762	-0.514	0.6073	-	---?+-+--+---+++---+----+	-0.0026	0.006
1444565	rs274130	c	g	99150	-1.411	0.1583	-	-+-++++-----+--+----++--?	-0.0092	0.0074
1444566	rs2741302	a	c	99889	-0.347	0.7284	-	-+--++--++-+++---+---++++	-0.0025	0.0065
1444567	rs2741306	t	g	99674	-0.305	0.7603	-	-+--++-++++-++---+-+--+++	-9e-04	0.0056
1444568	rs2741309	a	c	10206	0.776	0.4376	+	?????????????+??????++???	0.015	0.0189
1444569	rs2741310	a	g	1940	-1.184	0.2365	-	??????????????-??????????	-0.0526	0.0442
1444570	rs2741311	t	c	96608	-0.337	0.7359	-	-+--++---+-+++-+-+-+---?-	-7e-04	0.009
1444571	rs274132	t	c	99098	-1.36	0.1739	-	-+-++++-----+--+----++--?	-0.0088	0.0074
1444572	rs2741321	t	c	96886	-0.852	0.3945	-	----++--++++++-------++?+	-0.0097	0.0086
1444573	rs274133	a	g	99150	1.13	0.2584	+	+-+----+++++-++-++++--++?	0.007	0.0076
1444574	rs2741331	t	g	99839	1.014	0.3106	+	--++--++---+-++++++++--+-	0.0098	0.0083
1444575	rs2741334	t	c	95716	1.264	0.2063	+	+-++--+--+++-+-+-+?+++-++	0.0156	0.0115
1444576	rs2741335	a	c	99900	-0.242	0.8086	-	+-+-+-----+--+--++++---+-	-0.003	0.0057
1444577	rs2741337	a	t	99873	0.369	0.7118	+	-+-+-+++-++-+-++----+++--	0.0043	0.006
1444578	rs2741338	t	c	99895	-0.546	0.5853	-	+-+-+---+--+-+--+++++--+-	-0.0054	0.0058
1444579	rs2741339	a	g	99900	-0.619	0.5359	-	+-+-+------+-+--+++++--+-	-0.0049	0.0057
1444580	rs274134	t	c	99150	-1.412	0.1579	-	+--+-++-----+--+----++--?	-0.0098	0.0078
1444581	rs2741341	a	g	99900	0.994	0.32	+	-+-+++++++--++-++-+++-+--	0.0067	0.0055
1444582	rs2741342	t	c	7807	1.948	0.0514	+	?????????????+???????????	0.0484	0.0248
1444583	rs2741343	a	g	99900	-0.927	0.3541	-	+-+-+--+--+++++--++----++	-0.0066	0.005
1444584	rs2741348	t	g	9747	1.935	0.05305	+	?????????????++??????????	0.0382	0.0197
1444585	rs2741349	a	t	96862	0.851	0.3946	+	--+++++-+++-++++++--++-?+	0.0058	0.0051
1444586	rs2741351	a	c	99900	1.019	0.308	+	+++++-++-+--++++++-+++++-	0.0086	0.0065
1444587	rs2741352	t	c	99900	0.784	0.4333	+	--+++++-+++-++++++--++-+-	0.0055	0.005
1444588	rs2741353	a	g	99872	1.276	0.202	+	--+++-+-++--+++++-++++++-	0.0118	0.0071
1444589	rs2741354	t	c	99887	-1.06	0.2889	-	-+-----+---+------++--+-+	-0.0067	0.005
1444590	rs2741356	t	c	91106	1.085	0.2781	+	-+++----++++-++?-+?+-+-++	0.0095	0.0093
1444591	rs2741357	a	t	38383	-0.609	0.5427	-	-???++--????-+??+--????-?	-0.0151	0.0466
1444592	rs2741361	a	g	98409	2.027	0.04264	+	-++--+-+++-+++-++----++-+	0.0104	0.005
1444593	rs2741362	t	g	98409	2.172	0.02989	+	-+++-+-+++-+++-++----++-+	0.0112	0.005
1444594	rs2741363	a	g	98409	1.757	0.07892	+	-+++++-+++-++--++----++-+	0.0096	0.0053
1444595	rs2741366	a	g	94215	0.62	0.5356	+	++---+++-++-++-+-+?+--+++	0.0042	0.0068
1444596	rs2741367	a	c	94225	1.3	0.1935	+	-+++++-++++++--+-+?+++-+-	0.0121	0.0097
1444597	rs2741369	t	c	98409	1.759	0.07858	+	-+++++-+++-++-+++-+-+++-+	0.0095	0.0054
1444598	rs274137	t	c	99867	-1.64	0.101	-	+--+-++-----+--+----++---	-0.0113	0.0076
1444599	rs2741370	t	c	98378	1.574	0.1156	+	-++-++-+++-++--+++-+-++-+	0.0082	0.0051
1444600	rs2741372	a	g	98409	0.141	0.8875	+	---+-+-+++++----+----+--+	0.0011	0.0076
1444601	rs2741373	t	c	98409	-0.12	0.9046	-	-+---++----+-++-++-----+-	2e-04	0.0052
1444602	rs2741381	a	g	98409	-0.522	0.6014	-	-+++---+-++++--+--+++++-+	-0.003	0.0051
1444603	rs2741382	t	c	98409	0.717	0.4737	+	+---+++-+----++-++-----+-	0.0039	0.0051
1444604	rs2741383	t	c	98409	-0.615	0.5383	-	-+++---+-++++--+--+++++-+	-0.0033	0.0051
1444605	rs2741386	c	g	98409	0.404	0.6862	+	---+---++++++--+--+++++-+	0.002	0.0051
1444606	rs2741390	t	c	98393	0.122	0.9027	+	+++--++---+--++-++-+---++	7e-04	0.0049
1444607	rs2741396	t	c	98409	0.563	0.5732	+	---++-+++++++--+--+++++-+	0.0029	0.005
1444608	rs2741399	a	t	98372	-1.171	0.2414	-	+++-++-+---+---+++--+-+--	-0.007	0.0055
1444609	rs27414	a	g	88688	1.21	0.2262	+	+-?+?-++-++++-+?-+?-+++-?	0.0268	0.0224
1444610	rs274142	t	g	85622	1.066	0.2864	+	+++?++--??-+----+-+++-+?-	0.0061	0.0076
1444611	rs2741428	t	c	98409	0.487	0.6266	+	--++-----+++-++-+---+++--	0.0052	0.0072
1444612	rs274145	t	g	92752	0.65	0.5155	+	-++-++--??-+---++++++-+?-	0.0042	0.0096
1444613	rs2741450	a	t	98409	0.41	0.6817	+	----+++++-+--+--+-+---++-	0.0032	0.005
1444614	rs2741452	a	g	98409	0.335	0.7374	+	----+++++-+--+--+-+---+++	0.0029	0.005
1444615	rs2741454	t	c	98409	0.257	0.7972	+	----+++++-++-+-++-++--+-+	0.0023	0.005
1444616	rs2741455	t	c	98409	0.275	0.7831	+	----+++++-+--+--+-+---+++	0.0026	0.005
1444617	rs274147	a	g	85622	-0.973	0.3304	-	---?--++??+-++++-----+-?-	-0.0051	0.0077
1444618	rs274148	t	c	85622	-0.94	0.3473	-	---?--++??+-++++-----+-?-	-0.0051	0.0079
1444619	rs27415	c	g	99900	-0.01	0.9917	-	--++-++++---+-++-+-+-+-+-	0.0028	0.008
1444620	rs2741500	t	g	97659	-1.609	0.1076	-	-----++-+++++---+---+---?	-0.0083	0.0061
1444621	rs2741502	a	g	9740	0.178	0.8589	+	?????????????+??????++???	0.0034	0.0188
1444622	rs2741511	c	g	98409	1.263	0.2066	+	++-+-+-+-+-+-++--+++-++--	0.0057	0.0049
1444623	rs2741523	t	c	98409	-1.915	0.05543	-	-----+--+++++---+---+----	-0.0104	0.0064
1444624	rs2741538	t	c	94225	-0.893	0.372	-	++---+++----++-+-+?+--+++	-0.006	0.009
1444625	rs274154	t	c	93630	-0.181	0.8563	-	+--+--++??+-+++------+-?+	1e-04	0.0094
1444626	rs274155	a	g	85622	0.734	0.4632	+	-++?++--??-+---++-+++-+?-	0.0046	0.0095
1444627	rs2741553	t	c	94225	-0.202	0.84	-	++--+--++---++---+?-----+	-0.0018	0.0054
1444628	rs274156	t	c	92752	-0.464	0.6429	-	+--+--++??+-+++------+-?+	-0.0027	0.0101
1444629	rs2741566	t	c	98409	-0.67	0.5028	-	-----++--++-+---+-++++-+-	-1e-04	0.006
1444630	rs2741584	a	g	98409	0.467	0.6404	+	---+-+---+++--+-+---+++--	0.0046	0.0076
1444631	rs2741586	a	c	90479	-1.369	0.1711	-	-?-+-++--++-+--++-++++---	-0.0038	0.0062
1444632	rs274159	t	c	87614	-0.531	0.5951	-	+--+--++??+-+++------+-?+	-0.0032	0.0104
1444633	rs2741607	a	g	10236	1.705	0.08812	+	?????????????+??????++???	0.0425	0.0248
1444634	rs274163	a	g	92752	-0.749	0.4537	-	+--+--++??+-+++--+---+-?+	-0.0052	0.0104
1444635	rs2741638	a	g	96908	-1.472	0.141	-	---+-++--++-+---+-++++-?-	-0.0043	0.006
1444636	rs2741639	a	g	96908	1.399	0.1617	+	+++-+--++--+-+++-+----+?+	0.0038	0.006
1444637	rs2741640	a	c	96908	-1.435	0.1514	-	---+-++--++-+---+-++++-?-	-0.0041	0.0058
1444638	rs274165	c	g	92752	-0.72	0.4716	-	+--+--++??+-+++--+---+-?+	-0.0041	0.01
1444639	rs2741657	a	g	99835	-1.199	0.2305	-	--+--+---+--+-++-++-+-++-	-0.0058	0.005
1444640	rs2741658	t	c	95716	1.012	0.3116	+	-+-+--+--+++++-++-?++----	0.0058	0.0052
1444641	rs2741665	t	c	99900	0.213	0.8314	+	-+-+--+--+++-+-+++-++---+	0.002	0.0055
1444642	rs2741669	t	c	10214	-0.317	0.7516	-	?????????????+??????--???	-0.0075	0.0189
1444643	rs2741675	a	c	2431	-0.619	0.5362	-	????????????????????+-???	-0.0238	0.0381
1444644	rs274168	a	g	90511	-0.968	0.333	-	+--+-+++??+-+++?-+---++?+	-0.0082	0.011
1444645	rs2741680	c	g	99900	0.547	0.5844	+	-++----+-+----++-++--++--	0.0043	0.0062
1444646	rs2741683	t	c	96866	0.012	0.9904	+	+----+--+----+-++++--+-?-	-7e-04	0.0054
1444647	rs2741684	c	g	99900	-0.011	0.9913	-	+----+--+----+-++++--+-++	-0.0015	0.0054
1444648	rs2741688	t	c	99862	-0.083	0.9339	-	+--+-++-++-+-+------+--+-	-0.0014	0.0057
1444649	rs2741689	t	c	99896	-0.608	0.5429	-	-++-++++--+-+-++---++---+	-0.0029	0.0068
1444650	rs2741690	c	g	99110	0.538	0.5905	+	+--+----++-+-+--+++--++-?	0.0018	0.007
1444651	rs2741692	a	g	99900	-0.277	0.7817	-	-++---++-----+-+-++--+--+	8e-04	0.0062
1444652	rs2741694	a	g	99139	0.968	0.3328	+	+--+-+-++-++-++-----+++-?	0.0075	0.0079
1444653	rs27417	a	t	99900	-0.449	0.6534	-	+-++--+++-+-++++---0-+---	-0.0028	0.006
1444654	rs274170	t	c	85449	0.356	0.7217	+	+++-++--??++---?+-?++-+?+	0.0032	0.0103
1444655	rs2741703	t	c	99900	1.415	0.157	+	+---++--+-++--+++-+--++++	0.01	0.008
1444656	rs2741706	t	g	16287	-0.636	0.5246	-	??????+?--+??+??????--???	-0.0063	0.0149
1444657	rs274171	c	g	46890	-1.288	0.1979	-	?-?+--????--????--??+-??+	-0.0168	0.0127
1444658	rs2741710	t	c	99885	-1.39	0.1646	-	--+----+-++---++-++----+-	-0.0074	0.006
1444659	rs2741711	t	c	99830	-0.002	0.9987	-	+--+++--+--+-+-------++-+	-6e-04	0.0051
1444660	rs2741717	a	g	99900	-0.24	0.8104	-	-+-----+--+-++++++++--+++	-0.0015	0.0052
1444661	rs2741718	a	g	99900	0.18	0.8572	+	+--++++-++-+--------++---	6e-04	0.0051
1444662	rs274172	a	g	39401	-0.304	0.7613	-	???+?-?????+??-?-+??+--?+	-0.0038	0.0107
1444663	rs2741729	a	c	99896	-0.402	0.6876	-	+-++-++-+--+-----++------	-3e-04	0.0053
1444664	rs274173	c	g	51074	0.963	0.3355	+	?+?-++????++????-+-?-+??-	0.0129	0.0123
1444665	rs2741732	t	c	99900	-0.195	0.8455	-	+-++-++-+--+-----++------	0.0011	0.0054
1444666	rs2741737	t	c	99858	-0.29	0.7717	-	+-++-++-+-----+--++------	4e-04	0.0053
1444667	rs2741738	t	c	99900	0.517	0.6049	+	+-++-++++-+--+---++-+----	0.0039	0.006
1444668	rs2741740	a	g	96908	0.346	0.729	+	+-+-+-+++++---+-+-+---+?+	0.0026	0.0053
1444669	rs2741741	a	c	10253	0.608	0.5429	+	?????????????-??????++???	0.0102	0.0161
1444670	rs2741742	a	t	99874	0.131	0.8957	+	---+-+-----+++-+-+-+++-++	6e-04	0.0051
1444671	rs2741746	t	g	99900	-0.965	0.3343	-	-+-+-+--+-+-+----+-+++-+-	-0.004	0.0049
1444672	rs2741747	t	c	96908	0.71	0.4779	+	+-+-+-++-+-+--+++-+---+?-	0.0028	0.005
1444673	rs2741748	a	c	99900	0.094	0.925	+	+++-+-+++++--++-+-+---+--	4e-04	0.0051
1444674	rs2741749	t	c	10240	-0.907	0.3644	-	?????????????-??????--???	-0.0142	0.0153
1444675	rs2741751	a	g	96908	0.84	0.4009	+	+-+-+-++-+-+--+++-+---+?-	0.0033	0.0049
1444676	rs2741752	a	c	99899	0.263	0.7928	+	+++-+-+++++---+-+-+---+--	0.0017	0.0051
1444677	rs2741757	a	c	99797	-0.174	0.8617	-	-+---+-+-+-+-+--+--+++---	-0.0011	0.0069
1444678	rs2741759	a	g	99885	-2.346	0.01898	-	--++--+++-+-+-+---+++-+--	-0.0088	0.0049
1444679	rs2741762	a	g	96504	-1.339	0.1806	-	---+-+----+++---++--++-?+	-0.0054	0.005
1444680	rs2741764	a	g	36612	1.102	0.2704	+	-??+??????+??+?-????++??+	0.0116	0.0094
1444681	rs2741767	t	c	99853	0.563	0.5732	+	-+-+-+----++-++-+++-++---	0.0033	0.0055
1444682	rs2741771	a	t	99807	0.795	0.4269	+	-+++-+--+--++-++-+-++--++	0.0038	0.0049
1444683	rs2741773	t	c	41247	0.11	0.9123	+	?++?-+--+-??+++?-+--??-+?	5e-04	0.0069
1444684	rs2741774	t	c	99590	0.743	0.4575	+	-+++-+---+-++-++-+--+--+-	0.0034	0.0049
1444685	rs2741775	a	g	99867	-0.674	0.5	-	+---+-++-++--+--+-++-++-+	-0.003	0.0049
1444686	rs2741776	a	t	99900	-0.772	0.4403	-	+---+-++-++--+--+-++-++--	-0.0035	0.0049
1444687	rs274178	a	g	85622	0.628	0.53	+	-++?++--??-+----+-+++-+?-	0.0022	0.007
1444688	rs2741784	a	g	99900	0.659	0.5099	+	-+++-+--+--++-++-+--+--+-	0.0029	0.0049
1444689	rs274179	a	g	84003	-0.647	0.5178	-	+--?--++??+-?+++-+---+-?+	-0.0026	0.0072
1444690	rs2741790	t	g	99900	-0.665	0.5061	-	+---+-++-++--+--+-++-++-+	-0.003	0.005
1444691	rs2741794	t	c	7807	0.133	0.894	+	?????????????+???????????	0.0026	0.0191
1444692	rs2741800	t	c	99900	-0.717	0.4731	-	+---+-++-++--+--+-++-++-+	-0.0033	0.005
1444693	rs2741801	t	c	99900	0.555	0.5791	+	-+-+-+-----+++-+-+-+++-+-	0.0024	0.0051
1444694	rs2741802	a	g	99900	1.125	0.2605	+	+++-+--+-+---+-+--++-++++	0.0047	0.0058
1444695	rs2741803	a	g	99900	1.256	0.2091	+	+++-++-+-+---+-+--++-++++	0.0051	0.0057
1444696	rs2741804	a	g	99900	-2.232	0.02558	-	--++--+++-+-+-+---+0+-+-+	-0.0087	0.005
1444697	rs2741806	a	g	99727	-0.524	0.6002	-	+-+-+-+++++---+-+-+---+-+	-0.0022	0.0051
1444698	rs2741808	t	c	99900	0.442	0.6586	+	-+-+-+-----+++-+-+-+++-+-	0.0019	0.0051
1444699	rs2741809	c	g	99900	-0.52	0.6028	-	+-+-+-+++++---+-+-+---+--	-0.0022	0.0051
1444700	rs2741811	t	c	99900	-1.263	0.2065	-	---+--+-+-+++-+-++--+----	-0.0054	0.0056
1444701	rs2741812	a	g	99900	-1.267	0.2052	-	---+--+-+-+++-+-++--+----	-0.0054	0.0056
1444702	rs2741815	t	c	99900	0.275	0.783	+	---+-+-----+++-+-+-+++-+-	0.0017	0.0056
1444703	rs2741816	t	c	99900	1.479	0.1392	+	+++++-++++---+++--+---+++	0.0064	0.005
1444704	rs2741818	t	c	99900	-1.274	0.2027	-	---+--+-+-+++-+-++--+----	-0.0053	0.0056
1444705	rs274182	a	g	2424	0.221	0.8249	+	????????????????????-+???	0.0161	0.0515
1444706	rs2741820	a	g	99900	1.555	0.1199	+	+++-+-++++---+++--+---+++	0.0067	0.005
1444707	rs2741829	t	c	99900	-0.97	0.332	-	------+++----++-+-++-++--	-0.0033	0.0049
1444708	rs2741844	t	g	99900	0.284	0.7765	+	+++-+-+++++---+-+-+---+-+	0.0018	0.0051
1444709	rs2741845	t	g	96897	0.382	0.7022	+	+-+-+-+++++---+-+-+---+?+	0.0027	0.0052
1444710	rs2741849	a	g	96781	-0.74	0.4592	-	+---+++--++-++-?-+---++-+	-0.0068	0.0082
1444711	rs274185	a	t	85622	-0.691	0.4895	-	+--?--++??+-++++-+---+-?+	-0.0037	0.0074
1444712	rs2741852	c	g	96908	-0.559	0.5763	-	+---+++---++++--++-+-++?+	-0.002	0.005
1444713	rs2741853	a	g	99866	-0.081	0.9354	-	-------+++-+--+-+-+-++-+-	2e-04	0.005
1444714	rs2741856	c	g	94224	-2.476	0.01327	-	----+-----+----++-?-+-+-+	-0.0235	0.0103
1444715	rs2741862	a	g	99861	-0.046	0.9629	-	-+-++----+++---+---+-++++	-0.003	0.0057
1444716	rs2741863	a	g	99900	-0.153	0.8783	-	+--+-----+++---+---++++-+	-0.006	0.0054
1444717	rs2741865	t	c	10253	-1.223	0.2212	-	?????????????-??????+-???	-0.0201	0.0161
1444718	rs2741868	a	t	10251	0.303	0.7619	+	?????????????+??????+-???	0.0048	0.0166
1444719	rs2741872	a	t	99898	-0.389	0.697	-	-+--+++-+----+-----+-++++	0.0037	0.0099
1444720	rs27419	t	c	99900	1.282	0.1997	+	-+-+-++++-++-+-++-+++--++	0.0063	0.0053
1444721	rs2741900	t	c	98409	-0.662	0.5081	-	--+++-+--++--++--+-+++---	-0.0026	0.0053
1444722	rs2741902	c	g	98379	-0.787	0.4312	-	++--+-+--++--++--+-+++---	-0.0031	0.0053
1444723	rs2741907	a	g	90533	-0.753	0.4516	-	-?+++-++-++--++--+-+++---	-0.0028	0.0055
1444724	rs2741916	a	g	98409	-1.494	0.1352	-	--+---+-+--++-+++-----+++	-0.0049	0.005
1444725	rs2741919	t	c	98376	-2.165	0.03036	-	--+--+++----+-+++----+++-	-0.008	0.0049
1444726	rs2741930	c	g	98409	0.383	0.7016	+	+--+---++--++-+-+-++-+-+-	-0.0013	0.0052
1444727	rs2741932	a	g	98409	0.322	0.7477	+	+--++-+++---+++-+-++-+-+-	5e-04	0.0062
1444728	rs2741972	t	c	59249	0.127	0.8992	+	-??--+-++-++-???+?+-++-?+	0.0015	0.0106
1444729	rs2741985	t	c	36612	0.881	0.3782	+	+??+??????+??-?+????-+??+	0.0071	0.0101
1444730	rs2741990	t	c	98409	1.797	0.07231	+	--+---++-+++++++++-+-+-+-	0.0127	0.0057
1444731	rs27420	a	t	99884	0.34	0.7341	+	++---+++-+++----++--++--+	0.0069	0.0082
1444732	rs2742010	c	g	36612	0.611	0.5412	+	-??+??????+??+?-????--??+	0.0124	0.0144
1444733	rs2742032	a	g	20026	-0.569	0.5695	-	?????????????-???????????	-0.0389	0.0681
1444734	rs2742038	t	c	99900	-1.622	0.1049	-	---+------+-+++--+--+---+	-0.0123	0.0079
1444735	rs2742042	t	c	95715	-0.958	0.338	-	-+++---+-+----++-+?-++--+	-0.0052	0.0055
1444736	rs2742059	a	g	90401	-0.216	0.8287	-	+--?+++++++--+-++--++--++	-6e-04	0.0063
1444737	rs2742060	t	c	11655	0.495	0.6209	+	??????????+??+??????+-???	0.009	0.0183
1444738	rs2742072	a	t	87828	0.71	0.4776	+	+-+?-+++++-++---++?++-++?	0.0045	0.0066
1444739	rs2742079	t	c	2447	0.362	0.7174	+	????????????????????+-???	0.0118	0.0322
1444740	rs27421	t	c	96691	0.186	0.8526	+	------+---+++++-----+++?-	0.0024	0.0061
1444741	rs2742104	t	c	96908	0.868	0.3856	+	--+++-+---++-+-+++--++-?-	0.0057	0.0049
1444742	rs2742110	t	c	99900	-0.056	0.9554	-	---+-++-++++-----+--+----	8e-04	0.0052
1444743	rs2742113	t	g	99900	-0.148	0.8823	-	++--+--+----+++++-++-+-++	-0.0018	0.0052
1444744	rs2742114	t	c	99900	0.155	0.8767	+	--++-++-++++-----+--+-+--	0.0018	0.0052
1444745	rs2742115	t	c	99762	0.202	0.8399	+	--++-+--++++-+-+-+--++---	8e-04	0.0055
1444746	rs2742125	t	c	36612	0.218	0.8274	+	+??+??????+??-?-????+-??+	0.0024	0.0122
1444747	rs2742129	t	g	99632	1.528	0.1265	+	+-+++++++-+-++-+-++++---+	0.0133	0.0082
1444748	rs2742147	a	g	9491	-1.072	0.2836	-	?????????????-??????--???	-0.0193	0.0174
1444749	rs2742149	t	c	98409	-2.242	0.02498	-	+---------+++--+------++-	-0.0112	0.0051
1444750	rs274215	t	c	98409	0.991	0.3218	+	---++++++---++--+-++++++-	0.0056	0.0049
1444751	rs2742150	t	c	7807	0.509	0.6105	+	?????????????+???????????	0.0119	0.0233
1444752	rs2742158	t	c	36612	0.048	0.9616	+	-??+??????-??-?-????++??-	0.002	0.0104
1444753	rs274216	t	g	98409	0.981	0.3266	+	---++++++---++--+-++++++-	0.0056	0.0049
1444754	rs2742170	t	g	12425	-1.345	0.1788	-	???????---+?-?????????-??	-0.0802	0.0635
1444755	rs2742182	t	c	95881	0.346	0.7295	+	+++-+-+--+---+-+--+?--+-+	0.0023	0.0053
1444756	rs27422	t	c	99900	0.64	0.5219	+	--+++--+--++--+++++++----	0.0033	0.0051
1444757	rs2742234	t	c	96809	-0.706	0.4802	-	++---++++---+-++-+--+-+?-	-0.0034	0.0058
1444758	rs2742236	a	g	99138	-0.311	0.7554	-	++---+-++-+++-++-+----+-?	-0.0014	0.005
1444759	rs2742237	c	g	99150	0.178	0.8589	+	--+++--+--+--+----+----+?	0.0013	0.0064
1444760	rs2742240	a	t	99150	0.281	0.779	+	--+++--+-----+----+----+?	0.0015	0.0063
1444761	rs2742243	t	c	99900	-0.649	0.5162	-	-+-+---++-+--++--+-----++	-0.0028	0.0055
1444762	rs27423	a	g	96908	0.445	0.6565	+	--+++---+-++++++++-++--?-	0.0021	0.0049
1444763	rs274231	a	g	13536	0.327	0.7437	+	??????????+??++?????--???	0.0045	0.0137
1444764	rs2742323	a	t	98372	0.764	0.4448	+	-+---+++--++-++-+-+-+++++	0.0043	0.006
1444765	rs2742327	t	c	99892	0.097	0.9225	+	-++--+++-+--++----++----+	0.0036	0.0061
1444766	rs2742328	a	g	96900	1.386	0.1656	+	++++-++++-+-++----++-++?+	0.0212	0.0151
1444767	rs2742329	a	g	99892	0.966	0.3339	+	+++++++++-+-++----++-++-+	0.0144	0.0148
1444768	rs2742330	a	g	99892	0.968	0.3331	+	+++++++++-+-++----++-++-+	0.0148	0.0149
1444769	rs2742331	a	t	99892	-0.189	0.8499	-	-++--+++-+--++----++-----	0.0022	0.0061
1444770	rs2742332	t	c	99892	-0.95	0.3422	-	---------+-+--++++--+--+-	-0.0146	0.0149
1444771	rs2742333	t	c	99892	0.919	0.3582	+	+++++++++-+-++----++-++-+	0.0141	0.0149
1444772	rs2742334	t	c	96900	-1.231	0.2183	-	---------+-+--++++--+--?-	-0.0196	0.0151
1444773	rs2742335	t	c	96900	-1.225	0.2207	-	---------+-+--++++--+--?-	-0.0194	0.0151
1444774	rs2742336	t	g	96900	-1.218	0.2233	-	---------+-+--++++--+--?-	-0.0194	0.0151
1444775	rs2742337	a	g	96899	-1.265	0.206	-	---------+-+--++++--+--?-	-0.0198	0.0151
1444776	rs2742339	c	g	96900	-1.024	0.3058	-	---------+-+--++++--+--?+	-0.0168	0.0151
1444777	rs2742340	t	c	96899	-1.295	0.1952	-	---------+-+--++++--++-?-	-0.0205	0.0151
1444778	rs2742342	a	t	43480	0.483	0.6291	+	+?+?++?+?????+??--+????-?	0.0022	0.0301
1444779	rs2742343	a	g	99840	1.064	0.2874	+	+++++++++-+-++----++-++-+	0.0163	0.0149
1444780	rs2742344	t	c	96899	-1.001	0.3169	-	---------+-+--++++--+--?-	-0.016	0.0151
1444781	rs2742345	t	c	99880	0.498	0.6186	+	+---+++--+-+-++++++-+--+-	0.0049	0.0106
1444782	rs2742347	t	c	99892	-0.846	0.3973	-	+---++---+---+++++--+-++-	-0.0106	0.0111
1444783	rs2742350	a	g	99892	0.524	0.6003	+	+++++++++-+-++----++-++-+	0.0064	0.0148
1444784	rs2742351	c	g	94833	0.335	0.7375	+	-+-++++--+++-+??--+--+++-	0.0043	0.0062
1444785	rs2742352	t	c	99892	0.481	0.6307	+	+++++++++-+-++----++-++-+	0.0058	0.0151
1444786	rs2742353	t	g	99892	0.613	0.5402	+	+++++++++-+-++----++-++-+	0.0079	0.0139
1444787	rs2742354	t	c	99892	0.486	0.6269	+	+++++++++-+-++----++-++-+	0.0058	0.015
1444788	rs2742357	a	g	99892	0.783	0.4335	+	-+++--+++-+++-----++-+--+	0.0102	0.0112
1444789	rs2742358	a	g	99892	0.499	0.6178	+	+++++++++-+-++----++-++-+	0.006	0.0151
1444790	rs2742362	t	g	99841	-0.334	0.7383	-	----+-++-+++----+-+++-+-+	-0.0015	0.006
1444791	rs2742369	a	c	99900	0.095	0.9242	+	+++--+--+++++-++--+-++-++	-0.0015	0.0049
1444792	rs2742373	c	g	99900	-0.102	0.9191	-	---++-++-----+-+++-+--+--	0.0015	0.0049
1444793	rs2742388	a	g	99900	0.035	0.9722	+	--+++--+-+-++++-+---+---+	0.0015	0.0121
1444794	rs2742390	a	g	99726	-0.016	0.987	-	+++--+---++++-++--+-++-++	-0.0021	0.0049
1444795	rs2742393	a	t	99900	0.099	0.9209	+	+++--+--+++++-++--+-++-++	-0.0015	0.0049
1444796	rs2742394	t	c	99900	0.25	0.8029	+	+++--++-+-+++--+--+-++-++	1e-04	0.0051
1444797	rs2742395	t	c	99852	-0.134	0.8933	-	---++--+-+--+++-++-+--+--	3e-04	0.0051
1444798	rs2742396	t	c	90804	-1.472	0.1409	-	----+---+-+-+-+?++??+---+	-0.0111	0.0079
1444799	rs2742397	c	g	99780	-0.04	0.9683	-	+++--+--+-+++-++--+-++-++	-0.0022	0.0049
1444800	rs2742398	t	c	99882	-0.124	0.9012	-	---++--+-+--+++-++-+--+--	2e-04	0.0051
1444801	rs2742399	c	g	2485	-0.864	0.3876	-	-????????????????????????	-2.6855	3.095
1444802	rs2742407	t	c	95700	-0.652	0.5145	-	+-+-++-+---++-----?-+--++	-0.0077	0.0065
1444803	rs2742408	a	g	92597	1.316	0.1882	+	-+-+-++----++++?++?+-+---	0.0166	0.0102
1444804	rs2742409	a	g	99900	0.308	0.7579	+	+++--+-+-+-+------+-+--++	-6e-04	0.0051
1444805	rs2742412	t	c	99900	-0.197	0.8439	-	-++--+---++---+---+--+++-	-0.0032	0.0065
1444806	rs2742413	t	g	9747	0.303	0.762	+	?????????????++??????????	0.0104	0.0272
1444807	rs2742417	t	c	99868	-0.003	0.9975	-	+++--+---+++--+---+-++-++	-0.0016	0.0049
1444808	rs2742421	t	g	99803	-0.066	0.9475	-	---++-++----++--++-+--+--	0.0017	0.0049
1444809	rs2742422	a	g	7807	0.085	0.9324	+	?????????????+???????????	0.0014	0.0167
1444810	rs2742423	a	g	99879	-0.058	0.9539	-	---++-++----++--++-+--+--	0.0017	0.0049
1444811	rs2742424	a	g	96873	0.445	0.6565	+	+++--+-+-+-+----+-+-+-+?+	5e-04	0.005
1444812	rs2742427	a	g	91771	-0.016	0.9871	-	-?-++-++----++--++-+--+--	0.0021	0.0051
1444813	rs2742431	c	g	99867	0.093	0.926	+	---++-++-+--++--++-+--+--	0.0024	0.0049
1444814	rs2742433	t	c	99900	0.593	0.5531	+	+++--+-+-+-+----+-+-+-+++	0.0011	0.005
1444815	rs2742435	a	g	99732	0.074	0.9407	+	+++--+---+++--++--+-++-++	-0.0017	0.0049
1444816	rs2742437	a	g	96908	-0.152	0.8791	-	+++--+---+++--++--+-++-?+	-0.0026	0.0049
1444817	rs2742438	t	g	96908	-0.144	0.8852	-	+++--+---+++--++--+-++-?+	-0.0025	0.0049
1444818	rs2742439	a	g	96908	-0.131	0.8958	-	+++--+---+++--++--+-++-?+	-0.0024	0.0049
1444819	rs2742446	c	g	95716	0.357	0.7212	+	-+----+-+++--+++++?+--+--	0.0059	0.0065
1444820	rs2742447	a	g	99894	0.087	0.9304	+	+++--+--+++++-++--+-++-++	-0.0016	0.0049
1444821	rs2742448	a	g	99781	-0.063	0.9498	-	---++--+-+--+++-++-+--+--	9e-04	0.0051
1444822	rs2742449	t	c	99900	-0.055	0.9563	-	---++--+-+--+++-++-+--+--	7e-04	0.0051
1444823	rs2742453	a	g	7807	-0.922	0.3564	-	?????????????-???????????	-0.0183	0.0198
1444824	rs2742454	a	t	99900	-0.033	0.9737	-	+++--+---+++--++--+-++-++	-0.0024	0.0049
1444825	rs2742461	c	g	96740	0.246	0.8053	+	--+++--+---++++-+---+--?+	0.0045	0.0123
1444826	rs2742462	a	g	99900	-0.037	0.9701	-	+++--+--+++++-++--+-++-++	-0.0022	0.005
1444827	rs2742479	t	c	9669	0.369	0.7122	+	?????????????+???????????	0.0118	0.0318
1444828	rs2742480	a	g	99900	-0.312	0.7552	-	--+-++--+++-++-+-++-+-++-	-0.004	0.0049
1444829	rs2742487	a	t	99900	0.45	0.6527	+	--++-+--+++-++-+-++-+-+-+	0.001	0.005
1444830	rs2742488	c	g	99900	-0.501	0.6167	-	++--+-++---+--+-+--+-+-+-	-0.0013	0.005
1444831	rs2742491	a	t	99900	0.492	0.6226	+	--++-+---++-++-+-++-+-+-+	0.0011	0.005
1444832	rs2742493	a	c	11638	-0.137	0.8912	-	??????????-??+??????-+???	-0.0027	0.0152
1444833	rs2742495	t	c	9073	-0.016	0.9873	-	??????????+??-???????????	7e-04	0.0175
1444834	rs2742496	t	c	96871	0.128	0.898	+	++--+-+++--+--+-+--+-+-?+	0.0017	0.0051
1444835	rs2742497	a	g	99900	0.175	0.8612	+	--++-+---++-++-+-++-+-+++	-6e-04	0.0051
1444836	rs2742498	c	g	94091	-0.883	0.3773	-	++--+++++-+---??+--+----?	-0.0118	0.0147
1444837	rs2742499	t	c	93212	-1.054	0.2919	-	+++-?-+-+------+++?---++?	-0.0134	0.0144
1444838	rs2742502	a	g	99900	0.985	0.3244	+	--++++--++-+++++-++-+-+++	0.0046	0.0055
1444839	rs2742514	a	g	99837	-0.268	0.7888	-	++--+-+++--+--+-+--+-+---	0	0.005
1444840	rs2742519	t	g	99818	-0.288	0.7735	-	++--+-++---+--+-+--+-+---	0	0.005
1444841	rs2742521	a	c	96908	0.027	0.9787	+	++--+-+++--+--+-+--+-+-?-	0.0011	0.0051
1444842	rs2742522	t	c	94966	0.442	0.6588	+	---+-+-+-+++++----?-++--?	0.0065	0.0134
1444843	rs2742536	c	g	7807	0.723	0.4699	+	?????????????+???????????	0.0128	0.0177
1444844	rs2742537	a	g	99900	0.292	0.7701	+	-+++--++---+--+-+--+-+---	0.0043	0.005
1444845	rs2742540	a	g	99582	0.47	0.6386	+	--++--++---+--+-+--+-+---	0.0046	0.0049
1444846	rs2742545	c	g	99900	-0.299	0.765	-	++--++--+++-++-+-++-+-+++	-0.0042	0.0049
1444847	rs2742548	c	g	64588	2.047	0.04062	+	++++++++??+?--??+-?++--+?	0.0266	0.014
1444848	rs2742552	t	c	99900	0.506	0.6129	+	--++--++---+--+-+--+-+--+	0.0051	0.0049
1444849	rs2742556	t	c	99900	-0.604	0.5461	-	+--+-++----++-----++++-+-	-0.0028	0.0049
1444850	rs27426	t	c	94966	0.147	0.8831	+	--+++---++-+-++-++?-+---?	0.0017	0.009
1444851	rs2742621	a	g	98406	0.793	0.4279	+	-+-+---+----+++-+++++++--	0.0029	0.0055
1444852	rs2742624	a	g	98402	-0.943	0.3458	-	--+++++-++-+--+-+------++	-0.0031	0.0056
1444853	rs2742625	t	c	98406	-0.868	0.3856	-	--+++++-++-+--+-+------++	-0.0026	0.0056
1444854	rs2742630	a	g	98406	0.905	0.3655	+	++-----+--+-++-+-++++++--	0.0028	0.0055
1444855	rs2742634	t	c	98406	-0.449	0.6535	-	--+++++-++-++-+--------++	-5e-04	0.0058
1444856	rs2742635	t	c	96670	0.872	0.3833	+	++-----+--+-?+-+-++++++--	0.0024	0.0055
1444857	rs2742636	t	c	98406	-0.749	0.4538	-	--+++++-++-+--+-+------++	-0.0017	0.0055
1444858	rs2742637	t	c	94636	0.519	0.6037	+	-++--++-+?-+-+++++-----?-	0.0097	0.0113
1444859	rs2742641	a	t	98406	0.223	0.8234	+	+--++-+++++----++------++	0.0011	0.0051
1444860	rs2742647	c	g	92607	-0.645	0.5192	-	--+++++-+--+?-+--+?-+--++	-0.002	0.0072
1444861	rs2742648	t	c	98406	0.942	0.3464	+	++-+---+----+++-+++++++-+	0.0037	0.0054
1444862	rs2742651	c	g	94163	-1.931	0.05352	-	+-------++++---++-?-+-++-	-0.0126	0.0052
1444863	rs2742673	t	g	10230	0.686	0.4926	+	?????????????+??????+-???	0.0105	0.0166
1444864	rs2742680	c	g	98429	-0.022	0.9823	-	-++-+----+++-+++-+-++++-?	-9e-04	0.0074
1444865	rs27427	c	g	94966	0.22	0.8256	+	--+++---++-+-++-++?-+---?	0.0025	0.0091
1444866	rs2742702	a	g	99900	0.877	0.3806	+	++-+++-++----++-++---+-+-	0.0051	0.0077
1444867	rs274288	a	c	99900	0.887	0.375	+	++--+--+-+-++-+-+-+++----	0.0024	0.005
1444868	rs27429	a	c	99900	0.106	0.9155	+	+--+++---++----+-++-++0++	-0.0029	0.0101
1444869	rs274292	a	g	99793	-0.693	0.4886	-	--++-++-+-+--+-+-+--++++-	-0.0012	0.0053
1444870	rs2742920	t	c	1401	0.358	0.7204	+	??????????+??????????????	0.043	0.118
1444871	rs2742921	a	c	8569	0.808	0.4192	+	??????+?---?????????++???	0.0228	0.0167
1444872	rs2742922	a	g	8559	-0.82	0.4122	-	??????-?+++?????????--???	-0.023	0.0167
1444873	rs274293	t	g	99845	0.761	0.4467	+	++--+--+---++-+-+-+++---+	0.0024	0.005
1444874	rs274294	t	c	99845	0.725	0.4682	+	++--+--+-+-++-+-+-+++---+	0.0022	0.005
1444875	rs2742942	a	g	99900	0.771	0.4406	+	--++-+--+-++--+++++--+-++	0.0045	0.0103
1444876	rs2742951	a	t	99900	-0.876	0.3808	-	---+---++----+-++-++-++++	-0.0046	0.0053
1444877	rs2742952	a	g	99900	2.033	0.04206	+	+++-+++--+++++++-++-----+	0.0094	0.0053
1444878	rs2742954	c	g	80164	1.152	0.2495	+	++??-+-+?-?+?+-+-+?--++?+	0.01	0.0113
1444879	rs2742955	a	g	99900	-1.918	0.05506	-	---+---++-------+--+++++-	-0.0088	0.0052
1444880	rs2742956	c	g	99900	1.909	0.05624	+	+++-+++--+++++++-++-----+	0.0086	0.0051
1444881	rs274296	t	c	10247	-0.888	0.3746	-	?????????????-??????+-???	-0.0196	0.0222
1444882	rs2742966	c	g	99900	2.798	0.005145	+	+-+++++--+++++++-++++-++-	0.0208	0.0082
1444883	rs2742976	t	g	95716	-0.681	0.4956	-	---+--++-+-++---+-?+-+-+-	-0.0039	0.0062
1444884	rs2742981	a	t	36612	0.874	0.3819	+	+??+??????-??+?-????+-??+	0.0041	0.0104
1444885	rs2742982	t	c	99841	-1.325	0.1852	-	------+-+-+++-+++----++--	-0.0041	0.0057
1444886	rs2742983	a	g	99900	-0.172	0.8633	-	-+---++-+-++---+++--++--+	0.0031	0.0066
1444887	rs2742989	t	c	88908	-1.064	0.2875	-	-?-++-----+---+?++----+++	-0.0178	0.0178
1444888	rs2742991	a	t	99698	-1.339	0.1806	-	---+-+--+-----+++------++	-0.0095	0.005
1444889	rs2742998	a	g	99900	1.471	0.1412	+	-++-+-++-+++-----++++-+--	0.0107	0.0051
1444890	rs27430	t	c	99900	-0.369	0.7122	-	-+++-+-+-+-++--++++-+---+	-0.002	0.006
1444891	rs2743000	t	g	99900	1.158	0.2467	+	++--+-++-+++-----++++-+--	0.0081	0.0054
1444892	rs2743005	t	g	99900	-0.477	0.6335	-	++++---+--+--+-+-+--+----	-0.0041	0.0067
1444893	rs274301	t	c	99900	0.77	0.4414	+	++--+--+-+-++-+-+-+++----	0.0017	0.0051
1444894	rs2743014	a	g	99861	0.68	0.4962	+	-++++++--+--+++-+-+--++++	0.0063	0.0058
1444895	rs2743015	t	g	94840	-0.21	0.8334	-	--+--+++++-+++??+-+-++---	0.0018	0.0216
1444896	rs2743017	c	g	99900	0.451	0.6521	+	+-+++----+++-+--+----++--	0.0011	0.0049
1444897	rs2743019	a	g	73785	0.627	0.5305	+	+-??+---++++++??++?-??-+?	0.0037	0.021
1444898	rs274302	a	g	99882	-0.172	0.8634	-	+-++-++--+---+--+-+--+++-	-0.0012	0.006
1444899	rs274304	t	c	99900	0.456	0.6486	+	++--+--+---++-+-+--+----+	5e-04	0.005
1444900	rs274305	a	g	10212	-0.064	0.9488	-	?????????????+??????--???	-0.0014	0.0166
1444901	rs27431	t	c	99900	-0.329	0.7422	-	-+++-+-+-+-++--++++-+---+	-0.0018	0.006
1444902	rs274311	t	c	99881	-0.439	0.6606	-	--++-++-+++--+-+-++-++++-	-3e-04	0.005
1444903	rs274313	t	c	99900	0.416	0.6773	+	++--+--+---++-+-+-+++---+	4e-04	0.0051
1444904	rs2743159	c	g	98409	-0.783	0.4338	-	--+----++--++--+---+-++++	-0.01	0.0102
1444905	rs274316	a	c	99900	0.382	0.7021	+	++--+--+---++-+-+--++---+	-2e-04	0.005
1444906	rs2743189	t	c	29968	0.295	0.7679	+	-????????????-++????-+??+	0.0056	0.0117
1444907	rs2743197	t	c	70277	-0.887	0.375	-	-+??--?????-?-+-++?+--+?+	-0.0058	0.0078
1444908	rs2743199	a	g	22041	-0.57	0.5684	-	???????????-?????????????	-0.051	0.0905
1444909	rs27432	a	g	99900	-1.643	0.1004	-	-++-----+------+-+--+++-+	-0.0093	0.0054
1444910	rs2743201	a	g	88377	-1.256	0.2092	-	+-+?+-+--+?+--+--+-+--+?-	-0.007	0.0064
1444911	rs2743208	t	c	99890	-0.868	0.3854	-	+--+------+--+--++++--++-	-0.0085	0.0079
1444912	rs2743214	t	c	99150	-0.856	0.392	-	-+-+---+-++-----++-+---+?	-0.0106	0.0134
1444913	rs2743218	t	g	99900	-1.197	0.2312	-	++--+---+-+----+-+----++-	-0.0073	0.0061
1444914	rs2743246	a	t	98349	-1.314	0.1887	-	--+-+-+-+-+-+--++---+--+-	-0.0059	0.0049
1444915	rs2743275	a	g	94169	1.664	0.09616	+	+++-+++++---++++--?++++-+	0.0077	0.0052
1444916	rs2743283	a	g	96617	-1.502	0.1331	-	--+-+---+-+-?--++---+--+-	-0.0071	0.005
1444917	rs2743290	t	c	96794	1.431	0.1523	+	++-+-+-+-+-+?++--+++-++-+	0.0065	0.005
1444918	rs2743293	a	t	98409	-0.18	0.8572	-	--+--+++-+-+---++-++++-++	0.0046	0.0086
1444919	rs27433	t	g	99900	-0.011	0.9915	-	++++-+--++++---+-+--+-++-	-0.0027	0.007
1444920	rs2743312	a	g	98409	-0.171	0.8639	-	+++++-++------+--+--+-+++	2e-04	0.0049
1444921	rs2743326	a	g	96908	1.409	0.1588	+	++-+++---+-+-++--+++-++?-	0.0062	0.005
1444922	rs2743327	c	g	98409	1.287	0.198	+	++-+++---+-+-++--+++-++--	0.0059	0.005
1444923	rs2743330	a	c	98409	-1.189	0.2346	-	-----+--++++---++---+--+-	-0.0063	0.0056
1444924	rs2743334	a	g	98409	1.185	0.2359	+	+++++-++----+++--+++-++-+	0.0063	0.0056
1444925	rs2743388	a	c	98409	-0.464	0.6427	-	++++-----+-++-++-+-+++---	-0.0035	0.005
1444926	rs2743396	t	c	98409	1.283	0.1994	+	++-+-+-+-+-+-++--+++-++-+	0.0058	0.005
1444927	rs27434	a	g	99900	-0.328	0.7433	-	++++-+---+-----+--+-+++-+	-0.0038	0.006
1444928	rs2743402	t	c	98409	-1.581	0.1138	-	---+-++--++-+---+-++++---	-0.0049	0.0058
1444929	rs2743403	a	g	96773	-1.522	0.128	-	---+-++--++-+---+-++++-?-	-0.0048	0.006
1444930	rs2743411	t	c	98409	1.298	0.1941	+	+++----++--+-+++-+----+-+	0.0044	0.006
1444931	rs2743419	t	c	98409	1.507	0.1318	+	+++-+--++--+-+++-+----+++	0.0047	0.0058
1444932	rs2743423	t	c	98409	-1.513	0.1304	-	---+-++--++-+---+-++++---	-0.0046	0.0058
1444933	rs2743430	t	g	98409	0.519	0.6038	+	--++-----+++-++-+---+++--	0.0055	0.0072
1444934	rs2743439	a	c	96908	-1.548	0.1215	-	---+-++--++-+---+-++++-?-	-0.0048	0.0058
1444935	rs274345	c	g	96883	-0.48	0.6315	-	---+-++++-+--+-+-+-++-+?-	-0.002	0.005
1444936	rs274346	t	c	93040	0.828	0.4077	+	+-++---+-++++++?++--+++?+	0.0035	0.0107
1444937	rs2743467	a	g	98406	-0.105	0.9166	-	---++++-++------++++++---	1e-04	0.0054
1444938	rs27435	t	c	99893	-0.356	0.7217	-	+-++-+++-+---++--+---+-+-	-0.0012	0.005
1444939	rs2743543	a	g	1456	-0.072	0.943	-	??????-??????????????????	-0.0035	0.0503
1444940	rs2743550	a	c	96908	0.723	0.4694	+	+++-+++-+--+-+-+++-+-++?+	0.0076	0.0087
1444941	rs2743551	a	g	7807	-1.42	0.1556	-	?????????????-???????????	-0.0559	0.0392
1444942	rs2743553	a	g	99900	0.68	0.4968	+	+++-+++-+--+-+-+++-+-++-+	0.0072	0.0086
1444943	rs2743554	a	g	99900	0.337	0.7359	+	++++-++-++-+--+---+++--+-	0.0076	0.0111
1444944	rs2743556	a	g	99900	-0.26	0.7952	-	+--++---+--+----++-+-++++	-0.002	0.0051
1444945	rs2743561	t	c	87960	0.507	0.6124	+	+-?+?-++++-+--??-++--+-?+	0.018	0.0202
1444946	rs2743562	c	g	96908	-0.342	0.7321	-	+++---+++-+---+-+++---+?+	-0.0043	0.0094
1444947	rs2743564	t	c	96908	-0.337	0.7358	-	+++---+++-+---+-+++---+?+	-0.0044	0.0094
1444948	rs2743570	a	c	84373	0.102	0.919	+	?+++-+---+++---?-+-?-++?-	0	0.0113
1444949	rs2743571	c	g	86833	0.802	0.4227	+	++-+-++-++-+---?-+-?-++?-	0.004	0.0108
1444950	rs2743576	a	g	26981	-0.406	0.6845	-	--+?+??+????-???--?-???-?	0.013	0.0698
1444951	rs2743582	t	c	95716	-1.056	0.2909	-	--+-+--+---+------?-+++-+	-0.0069	0.0067
1444952	rs2743590	t	c	95456	1.027	0.3043	+	++-+-++-+++-++++++?+-+-+-	0.0067	0.0067
1444953	rs2743591	t	c	95716	1.12	0.2628	+	++-+-++-+++-++++++?+-+-+-	0.0073	0.0065
1444954	rs2743593	a	c	92688	1.074	0.2827	+	++-+-++-+++-++++++?+-+-?-	0.0068	0.0067
1444955	rs2743595	a	g	99862	-0.804	0.4216	-	++---++-+++-------++---++	-0.005	0.0052
1444956	rs2743596	a	c	29636	0.284	0.7761	+	????++?????-????++????-?+	0.0081	0.0212
1444957	rs2743597	t	c	74989	0.819	0.4127	+	++?-+-?????+?-+--+?+??-?+	0.0031	0.0074
1444958	rs2743598	a	c	76984	0.659	0.5097	+	++?-+-?????+?-+--+?+---?+	0.0033	0.0076
1444959	rs27436	t	c	99900	0.406	0.685	+	+--++++--++++---+--+--+++	0.002	0.005
1444960	rs2743602	t	c	87365	-0.183	0.8549	-	?+++-+---+++---?-+-?-++--	-0.004	0.0108
1444961	rs2743604	a	g	89850	0.306	0.7594	+	++-+-+---+++---?-+-?-++--	-0.0022	0.011
1444962	rs2743610	t	c	89825	0.337	0.7359	+	++-+-+---+++---?-+-?-++--	-0.0025	0.0108
1444963	rs2743611	t	c	99900	-0.366	0.7141	-	----+-+---+-++-+-+++-+-+-	-0.0017	0.0051
1444964	rs2743613	a	t	85611	-0.361	0.7178	-	?+++?+---+-+---?-+-?-++--	-0.0046	0.011
1444965	rs2743615	t	c	89850	-0.437	0.6619	-	--+-+-+++-+-+++?+-+?+--++	0.0014	0.0105
1444966	rs2743616	a	t	63433	-1.046	0.2956	-	?---?+---+-?---?-+-?-++--	-0.0147	0.0133
1444967	rs2743617	t	c	89850	0.469	0.6389	+	++-+-+---+-+---?-+-?-++--	-6e-04	0.0108
1444968	rs2743618	a	c	99900	0.37	0.7111	+	++++-+-+++-+--+-+---+-+-+	0.0017	0.0051
1444969	rs274362	t	c	99900	-0.704	0.4815	-	-+++--++-+-----+-+-++++--	-0.0025	0.0051
1444970	rs274365	t	c	99900	0.367	0.7139	+	-+-+-++++-++-+--+--+++--+	0.0041	0.0067
1444971	rs274366	c	g	99900	-1.38	0.1675	-	+-++-----++--+-+-+-+-++--	-0.0084	0.0061
1444972	rs274369	c	g	99900	2.92	0.0035	+	-+++++-++-+++++-+-+-+-+++	0.0156	0.0054
1444973	rs27437	a	g	91944	-0.462	0.6443	-	-?--++-++--+--++--+-+--+-	-0.0028	0.0052
1444974	rs274373	t	g	99900	-2.458	0.01397	-	+--------++----+-+-+-+---	-0.0125	0.005
1444975	rs27438	a	g	99900	1.842	0.06542	+	--++-+-++++++++-++++++++-	0.0106	0.0062
1444976	rs2743820	t	c	98406	-1.522	0.1281	-	+----+-++--+--+-+++---+--	-0.0084	0.0052
1444977	rs2743824	t	c	98284	-1.212	0.2256	-	+---+++-+---+-+++++--++--	-0.0062	0.005
1444978	rs2743825	t	g	36609	-0.957	0.3386	-	+??-??????-??-?+????-+??-	-0.0103	0.0089
1444979	rs2743827	a	t	97656	0.306	0.7596	+	-++++++-----+-+--++++---?	0.0064	0.0073
1444980	rs2743843	a	g	98406	0.552	0.5811	+	+--+++--+--++---+++++-+-+	7e-04	0.006
1444981	rs2743847	a	g	98400	0.749	0.4537	+	-+-++-++-----+-++-+++++-+	0.0041	0.0051
1444982	rs2743853	c	g	99900	0.436	0.6629	+	++--+++-+-+--+-+++-+-++--	0.0065	0.009
1444983	rs2743854	a	g	99900	0.737	0.4608	+	++--+++-+--+-+-+++-+-++++	0.0074	0.0087
1444984	rs2743857	t	c	99900	-0.469	0.6387	-	----++-+-+++++++-++------	-0.0045	0.0061
1444985	rs2743861	a	c	7807	1.52	0.1286	+	?????????????+???????????	0.0601	0.0394
1444986	rs2743862	c	g	10254	-0.08	0.9359	-	?????????????+??????--???	-0.0021	0.0196
1444987	rs2743864	t	c	36612	0.051	0.959	+	+??-??????-??-?+????-+??+	-0.0012	0.0155
1444988	rs2743865	a	g	96908	0.78	0.4352	+	++--+++-+--+-+-+++-+-++?+	0.0076	0.0087
1444989	rs2743866	t	c	99900	0.708	0.4789	+	++--+++-+--+-+-+++-+-++++	0.0073	0.0086
1444990	rs2743867	t	c	99891	0.659	0.5098	+	++--+++-+--+-+-+++-+-++++	0.0069	0.0087
1444991	rs2743868	t	c	99900	-0.054	0.9572	-	++--++-++-+--++-+-+-++---	-5e-04	0.005
1444992	rs2743869	a	g	99790	0.693	0.4885	+	++--+++-+--+-+-+++-+-++++	0.0073	0.0086
1444993	rs2743870	a	c	99864	0.76	0.4472	+	++--+++-+--+-+-+++-+-++++	0.0075	0.0086
1444994	rs2743871	a	c	99900	0.807	0.4194	+	++--+++-+--+-+-+++-+-++++	0.0078	0.0086
1444995	rs2743872	t	g	96908	0.694	0.4874	+	++--+++-+--+-+-+++-+-++?+	0.0071	0.0087
1444996	rs2743877	a	t	10246	-0.203	0.839	-	?????????????-??????-+???	-0.0026	0.0161
1444997	rs2743878	t	c	99900	1.426	0.1539	+	++-+++--+-++++---+---++++	0.0065	0.0051
1444998	rs2743879	t	c	99900	1.43	0.1528	+	++-+++--+-++++---+---++++	0.0065	0.0051
1444999	rs2743891	a	c	99867	-0.687	0.4918	-	-+------+--++----++++--++	-0.0041	0.0049
1445000	rs27439	t	c	96763	-0.478	0.6329	-	---+++---+---+-?-++-+-++-	-0.0029	0.0057
1445001	rs2743917	t	c	99900	1.828	0.0676	+	+-----+--+-+++-++++++--++	0.0086	0.0049
1445002	rs2743918	a	g	99900	-1.571	0.1162	-	-+++++-++-+---+---+--+---	-0.0076	0.0049
1445003	rs2743922	t	g	92041	1.52	0.1286	+	+?----+--+-+++-+++-++-+++	0.0081	0.0052
1445004	rs2743925	t	c	13593	-0.716	0.474	-	??????????-??-+?????--???	-0.0135	0.0179
1445005	rs2743931	t	c	99900	0.419	0.6754	+	++-++-+-----+-+--+++++-++	0.0027	0.0066
1445006	rs2743932	t	c	72050	0.862	0.3885	+	+++++--+++-?++??++--+-+-?	0.0065	0.0155
1445007	rs2743933	t	c	72050	-1.142	0.2534	-	-----++---+?--??--++-+-+?	-0.0093	0.0157
1445008	rs2743934	t	c	72050	1.107	0.2685	+	+++++--+++-?++??++--+-+-?	0.0079	0.0156
1445009	rs2743937	t	c	99875	-0.711	0.477	-	+--+-+--++---+-+++--++++-	-0.0043	0.0057
1445010	rs2743941	t	c	9747	-1.378	0.1682	-	?????????????--??????????	-0.0241	0.0177
1445011	rs2743944	a	g	1940	0.153	0.8787	+	??????????????+??????????	0.0067	0.0439
1445012	rs2743949	t	c	99900	1.368	0.1714	+	+--+--+--+-+++-+++-++++++	0.0065	0.0049
1445013	rs2743950	t	c	99150	1.643	0.1004	+	+-++--++-+++-+++++--++-+?	0.0109	0.0066
1445014	rs2743951	t	c	99900	1.62	0.1051	+	+--+--+--+-+++-++++++--++	0.0075	0.0049
1445015	rs2743953	a	g	99900	-0.948	0.3431	-	-++-+---+--+--+----+--+-+	-0.0057	0.0061
1445016	rs2743955	a	t	99900	0.063	0.9498	+	-++-+--+-+--+---++--+++++	9e-04	0.0056
1445017	rs2743960	a	t	91558	-0.717	0.4736	-	+---++--??--+-??---+-+-++	-0.0111	0.0111
1445018	rs2743961	a	g	9747	-0.373	0.7093	-	?????????????-+??????????	-0.0077	0.02
1445019	rs2743962	t	c	59550	1.604	0.1088	+	+?-?-+++???+++??-+?+??+?-	0.0478	0.0306
1445020	rs2743979	a	g	96877	0.371	0.7109	+	++---+--+-++-+-+++-+-+-?-	0.0016	0.0051
1445021	rs2743980	a	g	99900	0.242	0.8091	+	+----+++-+-+--++++-++--++	0.0023	0.006
1445022	rs2743982	c	g	96781	-0.672	0.5018	-	----++-+-++-+++?------+-+	-0.0044	0.0058
1445023	rs2743984	a	t	96781	0.066	0.9472	+	--++--+++--++--?-+-+---+-	0.0016	0.0052
1445024	rs2743989	a	g	99900	0.628	0.5303	+	++-+--+-++-++-++++-+++---	0.0041	0.0054
1445025	rs2743991	t	c	10251	0.02	0.9844	+	?????????????-??????++???	9e-04	0.0162
1445026	rs2743992	t	c	99900	-0.149	0.8812	-	-+++--+-++-++-++-+-+-----	0.0025	0.0055
1445027	rs2743993	t	c	99900	0.712	0.4766	+	++-+--+-++-++-++++-+++-+-	0.0042	0.0051
1445028	rs2743994	a	t	99900	1.006	0.3144	+	+--+--+-++-+++---+-+++--+	0.0062	0.0049
1445029	rs2743995	t	c	99900	0.97	0.3322	+	+--+--+-++-+++---+-+++---	0.006	0.0049
1445030	rs2743999	t	c	99900	-0.146	0.8837	-	----++-+-++--+--+-+---+--	-0.003	0.0053
1445031	rs2744002	a	g	7807	0.073	0.9418	+	?????????????+???????????	0.0014	0.0196
1445032	rs2744008	a	c	99900	-0.577	0.5637	-	--+-++-+--+---+++-+---+-+	-0.0043	0.0049
1445033	rs2744009	t	c	99900	-0.443	0.6577	-	+-+-++-+--+--+----+---+-+	-0.0027	0.0051
1445034	rs2744011	a	g	96781	-0.727	0.4673	-	--+-++-+--+-+++?+----++--	-0.0045	0.0054
1445035	rs2744012	a	g	96781	-0.062	0.9502	-	----++-+--+-+++?+-+--++--	-0.0012	0.0055
1445036	rs2744013	a	g	96781	0.462	0.6438	+	++-+--+-++-+---?-++++--++	0.0032	0.0054
1445037	rs2744021	a	g	86707	-0.358	0.7202	-	---+-++-++-++-??+-+--++?+	-8e-04	0.0077
1445038	rs2744022	a	c	96781	-0.103	0.9181	-	++++--+--+----+?-++++++--	0.0019	0.0068
1445039	rs2744023	c	g	96781	0.609	0.5422	+	--+---+--++---+?+-+--++++	0.0054	0.0056
1445040	rs2744024	a	g	94841	0.282	0.7777	+	+++-+--+--+--+??-+-++----	2e-04	0.0073
1445041	rs2744025	a	g	96781	-0.263	0.7923	-	+++----+--+--+-?-+-++----	-0.003	0.0073
1445042	rs2744026	a	g	99900	0.412	0.6807	+	-+++-++--++---+-+-+--+++-	0.0046	0.0056
1445043	rs2744027	a	c	99900	-0.293	0.7692	-	+---+--++--+++-+-+-++---+	-0.0038	0.0056
1445044	rs2744028	a	g	99900	0.353	0.7237	+	-+++-++--++---+-+-+--+++-	0.004	0.0056
1445045	rs2744030	t	c	2700	0.518	0.6043	+	??????????-??????????+???	0.0213	0.0422
1445046	rs2744032	a	g	99900	0.316	0.752	+	-+++-++--++---+-+-+--+++-	0.0038	0.0056
1445047	rs2744033	t	c	99900	0.348	0.7279	+	-+++-++--++---+-+-+--+++-	0.004	0.0056
1445048	rs2744034	a	g	99900	0.343	0.7316	+	-+++-++--++---+-+-+--+++-	0.0039	0.0056
1445049	rs2744035	a	t	99900	0.428	0.6686	+	-+++-++--++---+-+-+--++++	0.0043	0.0056
1445050	rs2744036	a	t	99900	-0.459	0.6465	-	+---+--++--+++-+-+-++----	-0.0045	0.0056
1445051	rs2744037	a	t	99900	-0.021	0.9831	-	+++----+--+--+-+-+-++---+	-0.0014	0.0071
1445052	rs2744045	t	c	99900	0.001	0.9994	+	+++-+--++--+++-+-+--+----	-0.0011	0.0061
1445053	rs2744057	t	c	99895	-0.954	0.3402	-	+++------+-+--+-----+--++	-0.0072	0.006
1445054	rs2744058	t	c	99900	-1.32	0.1868	-	--++-----+----+---+++-++-	-0.0066	0.005
1445055	rs2744060	c	g	99900	-0.571	0.5677	-	++-++++-----+++-+--+-+--+	-2e-04	0.007
1445056	rs2744063	c	g	99900	0.195	0.8455	+	-+------+++-++-+--+-++-++	-3e-04	0.0051
1445057	rs2744064	t	c	94841	-0.005	0.9959	-	+++--+--+-----??--+--++-+	-0.0065	0.013
1445058	rs2744065	t	c	99900	-0.777	0.4371	-	-+------+-+-++++-+--++++-	-0.0043	0.006
1445059	rs2744069	t	c	99900	-0.731	0.4646	-	-+-----++---++-++---+--+-	-0.0038	0.005
1445060	rs2744070	a	g	10251	0.144	0.8857	+	?????????????+??????--???	0.0014	0.0167
1445061	rs2744071	c	g	99900	-0.315	0.753	-	-+-----++-++++-+-++-+--+-	-0.0025	0.0051
1445062	rs2744072	t	c	99900	0.206	0.837	+	+-+++++----+--+-+--+-++-+	0.002	0.0055
1445063	rs2744074	t	c	99900	0.436	0.6627	+	+-++++----++-----+++-++-+	5e-04	0.005
1445064	rs2744081	a	c	99900	-0.455	0.6492	-	+--++++--++-+++--+-------	-0.0019	0.0105
1445065	rs2744085	t	c	13597	-0.675	0.4999	-	??????????-??-+?????-+???	-0.0115	0.0179
1445066	rs2744088	a	g	11657	-0.809	0.4185	-	??????????-??-??????-+???	-0.0161	0.02
1445067	rs2744094	t	c	7807	0.145	0.8845	+	?????????????+???????????	0.0036	0.0246
1445068	rs2744098	t	g	99819	0.469	0.639	+	++----++-++++-++------+++	0.0041	0.008
1445069	rs2744099	t	c	99900	0.648	0.5169	+	-+--+-++--+++-++-----+-++	0.0093	0.0098
1445070	rs2744105	c	g	99900	0.681	0.4956	+	++----++-++++-++--+---++-	0.0059	0.0081
1445071	rs2744116	a	t	99900	-0.535	0.5929	-	---+--++-+---------++++--	-8e-04	0.0051
1445072	rs2744117	t	g	89907	0.402	0.6877	+	++-++-++-+--+-??++?-+++-?	0.0087	0.0105
1445073	rs2744119	a	g	97631	1.032	0.3021	+	+--+-+--+?-+++--++-----++	0.0071	0.0096
1445074	rs2744120	a	g	99900	-0.452	0.6512	-	---+-+--+-+-++-+-------++	-0.003	0.0052
1445075	rs2744121	t	c	99900	-0.017	0.9868	-	-+--+-+--------+++++++++-	0.0018	0.0061
1445076	rs2744122	c	g	99900	-0.599	0.549	-	+-++-+--++-+++-++++--+---	-0.0054	0.0054
1445077	rs2744123	c	g	89644	-0.664	0.5068	-	+-+--+--+----+??---++-+++	-0.0149	0.0116
1445078	rs2744125	a	c	99900	0.572	0.5672	+	-+--++-+-+--++++-++--+-++	0.0028	0.0065
1445079	rs2744127	t	g	94762	-1.261	0.2071	-	+-+--+--+----+-----++-++-	-0.0194	0.0115
1445080	rs2744130	a	g	99900	-0.361	0.718	-	-+--++-+----+++-++-++-++-	-0.0017	0.0049
1445081	rs2744139	a	g	1314	1.255	0.2094	+	??????????+??????????????	0.0663	0.0525
1445082	rs2744140	t	c	99900	0.204	0.838	+	+-++-+-+++++++++-----+--+	-0.001	0.0062
1445083	rs2744142	t	c	99900	-0.06	0.9522	-	-+--+-+---------+++++-++-	0.0018	0.0062
1445084	rs2744143	a	g	99900	-0.192	0.8481	-	-+-++-+---+-++++---++++--	1e-04	0.0074
1445085	rs2744144	a	t	99150	-0.138	0.8906	-	+-+--+-+++-+----+++----+?	-0.0018	0.0077
1445086	rs2744145	t	c	78934	0.516	0.6059	+	-+-+?-++??+-+-??+-++?++??	0.0193	0.0239
1445087	rs2744148	a	g	83801	1.454	0.1459	+	++-?+-+-??-+++--++?-+-+--	0.0134	0.0077
1445088	rs2744161	t	c	92000	-0.234	0.815	-	+?+-+-+-+-+-+----+++--+-+	3e-04	0.0051
1445089	rs2744164	a	c	99900	0.005	0.9959	+	---+-+-+-+-+--+++---+--+-	-0.0014	0.0049
1445090	rs2744165	t	c	99900	-0.229	0.8188	-	+-+-+-+++----+---+-+--++-	2e-04	0.0054
1445091	rs2744168	t	c	99711	0.156	0.8763	+	---+-+----++--+++--------	8e-04	0.0049
1445092	rs2744169	t	c	99890	-0.272	0.7856	-	-++++++-++--+-+---+++---+	6e-04	0.005
1445093	rs2744170	a	c	99900	0.331	0.7408	+	+--+------++-+++++-----+-	9e-04	0.0052
1445094	rs2744175	t	c	99867	0.252	0.8007	+	+---++++++-+-+---+-+--++-	0.0023	0.005
1445095	rs2744183	t	c	96891	-0.008	0.9936	-	+---++++++---+---+-+--+?-	0.0014	0.0049
1445096	rs2744184	t	c	99900	1.143	0.253	+	+-+---+-++-+-++-+++--++--	0.0085	0.0077
1445097	rs2744186	t	c	12383	-0.882	0.378	-	--??????????????????--???	-0.0547	0.057
1445098	rs2744189	t	c	99900	-0.126	0.8999	-	+-+-++++++---+---+-++-++-	7e-04	0.005
1445099	rs2744190	a	c	99900	-0.162	0.8713	-	+-+-++++++---+-----++-++-	7e-04	0.005
1445100	rs2744195	a	g	99900	-0.852	0.3944	-	+++-+-+++-+-+-----++--+++	-0.0037	0.0052
1445101	rs2744196	c	g	99900	-0.876	0.3809	-	+++-+-+++-+-+-----++--++-	-0.0039	0.0052
1445102	rs2744197	a	g	99900	0.11	0.9124	+	---+-+----++--+++----+--+	0	0.0049
1445103	rs2744198	a	g	99900	0.098	0.9222	+	+++-+-++++--++---++++-++-	0.001	0.0049
1445104	rs2744203	c	g	99900	1.314	0.1888	+	+++---+-++++-++-++++-++-+	0.0113	0.0077
1445105	rs2744204	t	c	99900	0.122	0.9032	+	+++-+-+++++-++---+-++++++	7e-04	0.005
1445106	rs2744206	t	c	7807	-0.561	0.5749	-	?????????????-???????????	-0.0215	0.0382
1445107	rs2744209	c	g	99893	0.116	0.9079	+	--+++--++++-++++-+-+-++--	-0.0018	0.0144
1445108	rs2744213	a	t	99900	-0.653	0.5137	-	+++---++---+-------0+--++	-0.0084	0.0162
1445109	rs2744225	t	c	96908	-0.628	0.5299	-	-++-++++-+--+-++-+---+-?-	-0.0015	0.007
1445110	rs2744228	t	g	99900	-0.179	0.8577	-	+---+----++----+-+-+-++--	-0.0011	0.0051
1445111	rs2744229	t	g	99900	0.098	0.9221	+	-+++-++++--++-+-+---+--++	8e-04	0.0051
1445112	rs274423	t	c	7807	-0.388	0.6983	-	?????????????-???????????	-0.0086	0.022
1445113	rs2744231	a	t	99900	0.784	0.4331	+	+---++++-++-+--++++--++--	0.0048	0.007
1445114	rs2744232	a	g	95716	-0.069	0.9451	-	+---+----++--+-+-+?+-++--	-7e-04	0.0052
1445115	rs2744234	a	g	99900	0.47	0.6385	+	++++---+-----+++---+-+--+	0.0022	0.0072
1445116	rs2744235	a	c	99880	-1.096	0.2729	-	-+++--+-++----+----++-++-	-0.0045	0.005
1445117	rs2744236	a	g	2447	0.155	0.8768	+	????????????????????-+???	0.0047	0.032
1445118	rs2744237	a	g	99828	1.04	0.2984	+	++++---+--++-+++--++-+--+	0.006	0.0069
1445119	rs2744238	a	g	99900	1.14	0.2544	+	+---++++-+++++-++++--++-+	0.0068	0.007
1445120	rs2744241	a	t	96908	-0.274	0.7837	-	++--+++--++--++----+-++?-	-7e-04	0.005
1445121	rs2744245	t	g	99900	0.447	0.6549	+	--++-+-++--++--++++-+--++	0.0014	0.0049
1445122	rs2744247	a	g	99900	0.551	0.5819	+	---+-+-++--++--++++-+--++	0.002	0.0049
1445123	rs2744249	t	c	99900	0.798	0.4249	+	++++---++--++--++++-+--++	0.0032	0.0049
1445124	rs2744254	t	g	99888	-0.976	0.3292	-	--+-++---+++---+---+-++--	-0.0058	0.0056
1445125	rs2744257	t	c	99876	-0.59	0.5551	-	--+-++-+++++--+----+-++--	-0.0037	0.0057
1445126	rs2744258	a	c	99900	-0.62	0.5353	-	--+-++-+++++--+----+-++--	-0.0038	0.0058
1445127	rs2744267	a	g	99863	-0.331	0.7404	-	--+-++-+++++--+---++-++--	-0.0026	0.0056
1445128	rs2744268	a	g	99867	-0.503	0.6147	-	--+-++---+++---+---+-++--	-0.0032	0.0054
1445129	rs2744269	a	g	99900	-0.294	0.7691	-	--+-++-+-+++--++--++-++--	-0.0025	0.0056
1445130	rs2744270	a	g	99763	-0.109	0.9129	-	--++-+--+-++--+-+++++--++	-7e-04	0.0137
1445131	rs2744272	t	g	99763	0.073	0.9418	+	++--+-++-+--++-+-----++--	3e-04	0.0137
1445132	rs2744273	a	g	99763	0.007	0.9947	+	++--+-++-+--++-+-----++--	-0.0011	0.0138
1445133	rs2744274	a	g	99763	0.098	0.9223	+	--++-+--+-++--+-+++++--++	0.0016	0.0136
1445134	rs2744287	a	g	99900	-0.972	0.3309	-	----+-+-++--++-++----++--	-0.0055	0.0076
1445135	rs2744288	a	c	99866	0.056	0.9552	+	-++--+--+++++--++-+--++--	2e-04	0.0051
1445136	rs2744289	c	g	99900	-0.078	0.9376	-	+--++-++----+++--+-++--++	-2e-04	0.0051
1445137	rs2744290	a	t	99837	-0.592	0.5539	-	--+-++--+++++--++----++--	-0.0023	0.0049
1445138	rs2744293	t	c	99900	-0.02	0.9839	-	-++--+--+++++--++----++--	2e-04	0.005
1445139	rs2744294	a	g	99900	-0.06	0.9525	-	+--++-++----+++--+-++--++	-1e-04	0.005
1445140	rs2744299	a	c	99900	-0.49	0.6244	-	--+--++-+++++--++----++--	-0.0017	0.005
1445141	rs274430	a	c	99900	0.351	0.7253	+	--++-+--+----++++-+---+--	7e-04	0.0049
1445142	rs2744300	a	g	99900	-0.005	0.9962	-	+--++-++-----++--++++--++	4e-04	0.0055
1445143	rs2744301	t	g	90657	-2.09	0.03657	-	--+--++-+-----??-+?-+--+-	-0.0193	0.0114
1445144	rs2744303	t	g	99900	0.641	0.5218	+	-+-+++--+---++-++----++--	0.0031	0.0052
1445145	rs274431	t	c	99900	-1.108	0.2677	-	-+--+-+---+++----+-+-+-+-	-0.0031	0.0053
1445146	rs274432	a	c	99900	0.929	0.353	+	+-++-+-+++---++++-+-+-+-+	0.0021	0.0053
1445147	rs274433	a	g	99866	1.056	0.2909	+	+-++-+-+++---++++-+-+-+-+	0.0028	0.0053
1445148	rs2744338	a	g	91643	0.692	0.489	+	+---+--+-++-+++?----+-+++	0.0104	0.0126
1445149	rs274434	a	c	99847	0.363	0.7165	+	--++-+--+----++++-+---+--	5e-04	0.0049
1445150	rs2744342	t	c	99900	-0.952	0.341	-	-++-++-++-+--++----+--+-+	-0.0064	0.0055
1445151	rs2744344	t	c	88638	-0.445	0.656	-	-+++-++----+---?++++-+-?-	-0.0069	0.0129
1445152	rs2744345	t	c	99900	-1.076	0.2818	-	-++-++-++-+---+----+--+0+	-0.007	0.0055
1445153	rs2744346	c	g	99900	-1.258	0.2083	-	-++-++-++-+---+----+--+0-	-0.008	0.0055
1445154	rs2744348	t	c	7807	-1.058	0.2899	-	?????????????-???????????	-0.0291	0.0274
1445155	rs2744349	a	t	99900	1.06	0.289	+	+--+--+--+-+++-+++--++--+	0.0069	0.0055
1445156	rs274435	t	c	99900	1.071	0.2841	+	+-++-+-+++---++++-+-+-+-+	0.0028	0.0053
1445157	rs2744358	a	g	94012	-0.573	0.5665	-	-+++-++---++---+++++----?	-0.0084	0.012
1445158	rs274436	t	c	99900	0.981	0.3268	+	+-++-+-+++---++++-+-+-+-+	0.0024	0.0053
1445159	rs2744365	a	g	99900	-1.617	0.1059	-	-++---+-+-+---+-+--+--+++	-0.0076	0.0058
1445160	rs2744368	t	g	99900	1.441	0.1495	+	+--+++-+-+-+++-+-++-++---	0.0067	0.0058
1445161	rs274437	t	c	99900	0.449	0.6535	+	-++++---+++--++++-+++-+--	-0.0013	0.0063
1445162	rs2744370	t	c	99767	-1.429	0.1529	-	-++-+-+-+-+---+-+--+--+++	-0.0065	0.0056
1445163	rs2744371	a	c	99886	-1.64	0.101	-	-++---+-+++---+-+--+--+++	-0.0076	0.0057
1445164	rs2744372	a	g	99815	-1.52	0.1285	-	-++---+-+-+---+-+--+--+++	-0.0069	0.0056
1445165	rs2744373	a	g	99900	2.484	0.01301	+	++++++-++--+++++-++-++---	0.0154	0.0074
1445166	rs2744374	t	g	99801	1.397	0.1624	+	+--+++-+---+++-+-++-++---	0.0063	0.0057
1445167	rs2744378	t	c	99900	0.211	0.8333	+	-+-++++--+++++++++-++-+--	0.002	0.0054
1445168	rs274438	t	c	99900	0.651	0.5148	+	++++++--++---++++-+-+-+-+	-7e-04	0.0064
1445169	rs2744381	a	g	99741	0.11	0.9125	+	-+-++++--++++++-++-++-+--	0.0014	0.0053
1445170	rs2744382	t	c	99818	-1.004	0.3152	-	--+-+--++----++++++---+++	-0.0068	0.005
1445171	rs2744386	t	c	99900	0.827	0.4084	+	++-+-++--++++++----+++---	0.0057	0.005
1445172	rs2744387	a	g	99900	-0.491	0.6237	-	--+-+--++--+-+++++-++-+--	-0.0028	0.005
1445173	rs2744388	a	g	99900	0.767	0.4429	+	++-+-+++-++-+--+--++++-++	0.0039	0.0051
1445174	rs274441	a	g	36612	1.448	0.1475	+	+??+??????-??+?+????+-??+	0.0098	0.0094
1445175	rs2744413	t	c	1940	1.15	0.2502	+	??????????????+??????????	0.0528	0.0457
1445176	rs2744422	a	g	99900	0.732	0.4641	+	-+-+++--+++++-+++-+--+---	0.0041	0.0061
1445177	rs2744425	t	c	98409	1.344	0.179	+	++---+-+-+-+--+++++-+++++	0.0069	0.0054
1445178	rs2744426	t	c	98409	0.594	0.5527	+	+++-++---+-+++++-+-+-++--	0.002	0.005
1445179	rs2744427	t	g	96908	1.46	0.1442	+	-+--+++++-+++-++-++++++?+	0.0133	0.0083
1445180	rs2744431	t	c	99900	1.488	0.1366	+	-+--+++++-+++-++--+++++++	0.0131	0.0081
1445181	rs2744432	a	c	99900	0.879	0.3793	+	-++++++-+---+++-+-++++-++	0.0058	0.0054
1445182	rs2744434	t	c	96908	1.311	0.19	+	-+--+++++-+++-++-++++++?+	0.0125	0.0084
1445183	rs2744450	a	g	99900	-1.424	0.1543	-	+--+----++-+------+-+++-+	-0.0113	0.0062
1445184	rs2744454	a	g	99867	-1.312	0.1897	-	+--+----++-+------+-+-+-+	-0.0107	0.0061
1445185	rs2744457	a	g	98186	-0.522	0.6017	-	+-------++-+?--+-++-+-+--	-0.0066	0.0073
1445186	rs2744458	a	c	99900	-1.271	0.2038	-	-------+++-++--+----+++--	-0.0107	0.0066
1445187	rs2744465	a	g	98406	-0.95	0.342	-	+++-+++---+-+---+--+-+--+	-0.0037	0.005
1445188	rs2744485	c	g	99900	0.823	0.4107	+	++++-++--++--++++-+++-+-+	0.0036	0.0049
1445189	rs2744488	a	c	99900	-0.995	0.3196	-	----+-+-+--------+---++++	-0.0035	0.0049
1445190	rs2744489	a	g	99900	-1.103	0.2698	-	----+-+-+--------+---++++	-0.004	0.0049
1445191	rs2744495	t	c	99900	1.487	0.1371	+	++++++-+-++-+++-+-+++----	0.0064	0.0049
1445192	rs2744498	t	g	96852	1.843	0.06527	+	++++++-+-++-+++-+-+++--?-	0.008	0.005
1445193	rs2744505	c	g	99900	0.6	0.5487	+	-+--+--++-++-++-+---+----	0.0047	0.0069
1445194	rs2744507	t	c	99900	-0.54	0.5892	-	+-++-++--+--+--+-+-+-+++-	-0.0039	0.0069
1445195	rs2744537	a	c	99858	-0.472	0.6367	-	-+--++--+-++-----+--+--++	-0.0017	0.0054
1445196	rs2744542	t	g	99785	-1.272	0.2035	-	++----++--++----++---++--	-0.0053	0.0058
1445197	rs2744543	a	g	99900	1.364	0.1725	+	--++++--++--++++--+++--++	0.0058	0.0058
1445198	rs2744544	a	t	99900	-1.641	0.1008	-	++----+++-++----++---++--	-0.0075	0.0065
1445199	rs2744557	a	t	99900	0.696	0.4865	+	--++++--+++--+++--+++--++	0.003	0.0066
1445200	rs2744558	t	c	2447	-0.623	0.5332	-	????????????????????+-???	-0.0663	0.1142
1445201	rs2744565	t	g	10255	-0.611	0.541	-	?????????????-??????-+???	-0.0101	0.0168
1445202	rs2744570	t	c	99900	-0.46	0.6457	-	-+++--+----++-++++++--+++	-8e-04	0.0053
1445203	rs2744572	t	c	99894	-1.836	0.06635	-	+---+----+--+-+-++++-+-+-	-0.0174	0.0086
1445204	rs2744574	t	c	99891	0.189	0.8501	+	+---++-++++--+---+--++---	-9e-04	0.0054
1445205	rs2744576	a	t	99819	1.229	0.2189	+	-++--+++++-+++-+++-++-+++	0.0073	0.0049
1445206	rs274458	t	c	99900	0.574	0.5663	+	++--+----+++-----+-+++---	0.0021	0.0056
1445207	rs2744583	a	g	99900	0.953	0.3404	+	++-++++++-++---+-++--++--	0.0038	0.005
1445208	rs2744584	a	g	99900	-1.481	0.1385	-	--++--+-+---+---+--+++-++	-0.0057	0.0054
1445209	rs2744586	a	c	99900	1.263	0.2067	+	++-+++-++-+--++--++---+--	0.0045	0.0056
1445210	rs274459	t	g	99900	-0.66	0.5096	-	--+-+--+-+------+-+++--+-	-0.0047	0.0067
1445211	rs2744591	t	g	91749	-1.411	0.1582	-	+--++-+--+---++?+-?-++--+	-0.0255	0.0197
1445212	rs2744594	a	t	96761	-0.364	0.7157	-	+-+-+-+-+++-+-+++-++---?+	-0.0049	0.0084
1445213	rs2744597	a	g	99895	-0.906	0.3648	-	+-+---+-++--+-+++-++-+-++	-0.0104	0.0093
1445214	rs2744598	t	g	99687	0.918	0.3585	+	-++-++--+++-++++--+++--++	0.0043	0.0052
1445215	rs27446	a	g	96781	0.181	0.8566	+	++---+++++-++-+?--+++---+	0.0017	0.0069
1445216	rs274460	t	c	99881	0.44	0.66	+	++-+-++-+--++-++-+---++-+	0.0028	0.0065
1445217	rs2744600	a	g	99877	-0.539	0.59	-	+--+--+++--+-+--++---++--	-0.0022	0.0052
1445218	rs2744601	c	g	96900	-0.368	0.7129	-	-++---+-+++++--+--+++--?+	-8e-04	0.0069
1445219	rs2744603	a	g	96873	-0.328	0.7429	-	+--+-++-+--+-+--++---++?-	-0.0014	0.0055
1445220	rs2744604	t	c	99900	-0.686	0.4927	-	-+++--++---++----+-++++--	-0.0017	0.0053
1445221	rs2744605	a	g	99893	0.796	0.4262	+	-+++-+---+-++++--++----++	0.0077	0.0118
1445222	rs274464	t	c	99900	2.182	0.0291	+	+-++--++-+++--+++-+-+++--	0.0138	0.0055
1445223	rs2744645	t	g	99870	-0.417	0.6763	-	--++---+--+-++--+-+-+++--	-0.0084	0.0076
1445224	rs2744647	a	g	96839	-0.007	0.9948	-	+-+--+---+---++++++----?-	-0.0023	0.0067
1445225	rs2744648	a	c	99816	-0.349	0.7274	-	+-+--+---+---++++++-+----	-0.0041	0.0066
1445226	rs2744649	a	g	10194	-1.169	0.2423	-	?????????????-??????--???	-0.0222	0.0172
1445227	rs2744650	c	g	96769	-0.359	0.7199	-	-+-++-+++-+-+------+--+?-	0	0.0066
1445228	rs2744651	t	c	99900	0.398	0.6903	+	+++-+-++++---+++++++-----	0.0019	0.0051
1445229	rs2744652	t	c	99900	0.488	0.6258	+	+++-+-++++---+++++++-----	0.0024	0.005
1445230	rs2744656	a	g	95716	1.538	0.124	+	++-+-+++--++-++-++?+-+---	0.0087	0.0055
1445231	rs2744657	t	c	88061	0.402	0.6878	+	---++--+-+-+++??+---++-+?	-0.0077	0.0205
1445232	rs2744658	c	g	99734	-0.509	0.6108	-	-+----+-+++++++-++-+--+--	0.0011	0.005
1445233	rs274466	t	c	99900	-1.942	0.0522	-	-+--++--+---++---+-+---++	-0.0125	0.0055
1445234	rs2744661	t	c	99838	-0.014	0.9891	-	--++-++-++-++++-++-++-+-+	0.0026	0.0049
1445235	rs2744662	a	c	99900	-0.381	0.7034	-	-+-++---+-+--+++-+++--+-+	-0.0023	0.0062
1445236	rs2744666	a	g	2443	-0.045	0.9641	-	????????????????????+-???	-0.0025	0.0337
1445237	rs2744669	t	c	2448	0.164	0.8698	+	????????????????????+-???	0.0039	0.0306
1445238	rs274467	a	g	96908	-1.226	0.2202	-	-++---++-+--------++-++?-	-0.006	0.0051
1445239	rs2744671	t	c	75597	-0.097	0.9231	-	-++?+-???+?--+-+-+?++--?-	0.0012	0.0072
1445240	rs2744677	t	g	99900	1.899	0.05757	+	++-+-++-++++-++-++++++-++	0.0108	0.006
1445241	rs2744679	a	g	99900	-2.631	0.008515	-	--+-+--++---+--+--+-+-++-	-0.0173	0.0064
1445242	rs274468	a	c	96908	0.707	0.4795	+	++-+-++-+---+-++-+---++?+	0.0046	0.0065
1445243	rs2744682	a	g	99900	-2.132	0.03297	-	--+-+---+-+----+--+---+--	-0.0143	0.0067
1445244	rs2744683	c	g	99900	-0.911	0.3623	-	-+++----+-+-+--+--+-+-+-+	-0.0068	0.0057
1445245	rs2744685	t	c	99900	-1.096	0.273	-	-+++----+-+-+--+--+-+-+--	-0.0077	0.0057
1445246	rs2744687	t	g	99900	-2.101	0.03562	-	--+-----+-+-+--+--+--++--	-0.0164	0.0077
1445247	rs2744688	a	g	99900	1.898	0.0577	+	++---+++-+-+-++-++++++-++	0.0127	0.0069
1445248	rs2744689	t	c	99900	-1.872	0.06121	-	--+++---+-+-+--+------+--	-0.0124	0.0069
1445249	rs2744690	a	c	99900	-1.891	0.05863	-	--+++---+-+-+--+------+--	-0.0125	0.0068
1445250	rs2744692	t	c	99883	-0.901	0.3676	-	--+-+-+-+--++-+++--++-++-	-0.0029	0.0056
1445251	rs2744697	a	g	99900	0.913	0.3614	+	+++++++--++--++---+----++	0.0093	0.0094
1445252	rs2744698	t	c	99900	-0.239	0.8109	-	-+-++---++---++--++++-++-	-0.0015	0.0068
1445253	rs2744703	a	g	99900	-1.155	0.248	-	+-+----++-++-+-++---+-+--	-0.0106	0.0098
1445254	rs2744704	a	t	99900	0.232	0.8166	+	+----+-++--+-+-+-+-++-+--	5e-04	0.0052
1445255	rs2744705	t	c	99900	0.255	0.7988	+	+-+--++++--+++-+-++--+++-	0.0011	0.006
1445256	rs2744706	t	c	99900	0.415	0.6784	+	+-+--++++--+++++--+--+++-	0.0022	0.006
1445257	rs2744708	a	g	9747	0.144	0.8858	+	?????????????+-??????????	0.0033	0.0165
1445258	rs2744712	a	g	99900	0.216	0.8292	+	+-+--++++--+++-+-++--+++-	5e-04	0.006
1445259	rs2744713	t	g	95716	-0.855	0.3927	-	-++++-+--+----+-+-?--+-++	-0.0036	0.0052
1445260	rs2744714	a	g	99900	0.764	0.4451	+	-+-++++--+--+-+--+++-+-++	0.0094	0.01
1445261	rs2744715	a	g	99900	0.179	0.8576	+	+-+--++++--+++-+-++--+++-	5e-04	0.0061
1445262	rs2744716	t	g	2366	-0.1	0.9202	-	????????????????????-+???	-0.0042	0.0431
1445263	rs2744718	t	c	99733	-0.182	0.8558	-	+-+-+-+++-++--+---+-+-+--	-0.0012	0.0066
1445264	rs2744719	t	c	99831	-0.354	0.7232	-	-+-+--+--+------+--++---+	-0.0018	0.0057
1445265	rs2744720	t	c	99900	-0.396	0.6923	-	-+-+--+--+------+--+++--+	-0.002	0.0057
1445266	rs2744721	t	c	99900	-0.055	0.956	-	+++--++++++--+-++----+-+-	1e-04	0.005
1445267	rs2744722	t	c	99900	1.285	0.1989	+	-+-++-+--+--+-+--++---+++	0.0139	0.0095
1445268	rs2744726	a	c	99900	0.732	0.4642	+	-+-+-+---++-+-++---+-++++	0.0058	0.0073
1445269	rs2744728	t	c	99900	-0.773	0.4393	-	+-+-+-+++--+-+--+++-+----	-0.0062	0.0073
1445270	rs2744730	a	g	99900	-0.419	0.6755	-	-------++-++++-+++--+++--	-0.0027	0.009
1445271	rs2744731	t	c	99900	-1.183	0.2368	-	--+-+-+++++-+--++----+-+-	-0.0046	0.0054
1445272	rs2744732	t	c	99900	0.628	0.5299	+	+++++++--+---++---++---++	0.0051	0.0093
1445273	rs2744733	t	c	99900	-0.578	0.5629	-	--+-+-++++-+-++-+++-+----	-0.0026	0.0079
1445274	rs2744734	t	c	99670	-1.847	0.06478	-	------+-+--+--+--++++-+--	-0.0097	0.0056
1445275	rs2744737	t	c	99900	0.306	0.7599	+	+++++++--+----+---++---++	0.0021	0.0088
1445276	rs2744738	t	c	96834	-0.719	0.472	-	+------++--+-++--++++-+?-	-0.0053	0.0049
1445277	rs2744739	a	t	99900	1.104	0.2695	+	-+-++-+--+--+-+---+---+++	0.0125	0.0095
1445278	rs2744741	t	c	99806	0.972	0.3309	+	++-+++++--+++-+--+-++---+	0.0048	0.005
1445279	rs2744743	t	c	7807	0.567	0.5705	+	?????????????+???????????	0.0103	0.0182
1445280	rs2744744	t	c	99900	-2.226	0.02598	-	------+-+-------+++-++---	-0.0108	0.0051
1445281	rs2744747	t	c	99900	-1.003	0.316	-	+-+-+-+-+----+--+++-++---	-0.005	0.006
1445282	rs2744748	a	g	99900	-0.814	0.4158	-	-------++-+++--+++--+++--	-0.0075	0.0094
1445283	rs2744749	a	t	99846	-0.875	0.3817	-	--+-----++---+-++-+--+++-	-0.0042	0.005
1445284	rs2744750	a	g	99661	1.161	0.2458	+	++-+++-+--+++-+--+-++-+-+	0.0051	0.0051
1445285	rs2744751	a	c	99900	1.176	0.2397	+	++-+++-+--+++++--+-++-+-+	0.0052	0.0051
1445286	rs2744752	a	g	99900	0.933	0.3509	+	+++++++--++--++---+----++	0.0097	0.0096
1445287	rs2744753	c	g	99900	1.045	0.2958	+	+++++++--++--++---+----++	0.0108	0.0096
1445288	rs2744754	a	t	99900	0.966	0.3341	+	+++++++--++--++---+----++	0.0097	0.0096
1445289	rs2744756	t	c	99900	-1.706	0.08792	-	------+-+------+++++++---	-0.0073	0.0051
1445290	rs2744757	c	g	99900	-0.676	0.4991	-	+-+---+-++---+--++--++-+-	-0.002	0.0056
1445291	rs2744759	t	g	92001	0.368	0.7127	+	+?+----+++-+-+-++-++-+++-	0.001	0.0052
1445292	rs2744761	t	g	99900	-0.438	0.6614	-	++----++-++-+++--+-+--++-	-0.0024	0.008
1445293	rs2744768	t	g	99900	-1.408	0.1592	-	+---+-++--+-++-----+--+--	-0.0099	0.0084
1445294	rs2744772	a	g	99857	1.281	0.2003	+	-+++-+--++-+--+++++-++-++	0.0094	0.0085
1445295	rs2744778	t	c	96892	-0.789	0.4304	-	++-++-++-++-+------++-+?-	-0.0056	0.0104
1445296	rs2744780	a	c	96826	0.685	0.4935	+	-+++++--+--+--+++-+-++-?+	0.0044	0.0083
1445297	rs2744784	a	g	99833	1.132	0.2575	+	--++-+--+--+-++++++--+-++	0.0086	0.0106
1445298	rs2744785	t	g	99900	0.579	0.5629	+	-+++++--+--+--+++-+-+--++	0.0037	0.0085
1445299	rs2744796	t	c	99900	-1.661	0.09673	-	+--+---+---+-+--+-+------	-0.0174	0.0076
1445300	rs27448	a	g	96908	-0.716	0.4738	-	++---+++-+-----+----+-+?+	-0.0033	0.005
1445301	rs2744803	a	g	96905	1.934	0.05307	+	-++-+++-+++-++++-+-++++?+	0.0196	0.0077
1445302	rs2744805	t	c	99900	1.046	0.2955	+	+++++-+-+---+++-+-+-+++-+	0.0066	0.0058
1445303	rs2744807	a	g	99900	0.592	0.5535	+	--++++----+-+++-+-+---++-	0.0015	0.0049
1445304	rs2744808	t	c	99866	-0.38	0.7039	-	+++++-+-----++--+++-+++-+	-0.0011	0.0058
1445305	rs2744810	t	c	99900	-0.552	0.581	-	--++-++-+-+-+---+-++-+-+-	-0.0022	0.005
1445306	rs2744812	t	c	99900	-0.142	0.8872	-	--+--++---+-+-+++--+-+--+	3e-04	0.005
1445307	rs2744813	a	t	99900	0.121	0.9035	+	+--+++-+++---+---++-+-++-	-4e-04	0.005
1445308	rs2744815	a	g	2445	0.042	0.9666	+	????????????????????-+???	0.0021	0.0336
1445309	rs2744816	a	g	88632	-0.649	0.5163	-	+--++----+---++?+---+-+?+	-0.0113	0.0151
1445310	rs2744817	c	g	88651	-0.838	0.4021	-	+--++----+---++?+-+-+-+?+	-0.0141	0.0152
1445311	rs274483	a	g	99876	0.118	0.9057	+	+-++++----++-+-+++-+-----	-0.0011	0.0051
1445312	rs2744844	t	c	99900	0.21	0.8337	+	++--+--+---++-++++--+-+-+	3e-04	0.005
1445313	rs2744847	t	g	99900	-0.271	0.7864	-	-++++++-+++---+-+-++-+-+-	-9e-04	0.005
1445314	rs274485	c	g	99900	-0.582	0.5604	-	-+-----+-+-++-+-----+++-+	-0.0016	0.0055
1445315	rs2744854	t	c	99791	-0.657	0.5109	-	--++-++-+-+-----+-++-+-+-	-0.0028	0.0049
1445316	rs2744857	t	c	99683	-0.659	0.51	-	--++-++---+-----+-++-+-+-	-0.0026	0.005
1445317	rs2744858	t	c	99900	-0.551	0.5816	-	--++-++-+-+-----+-++-+-+-	-0.0023	0.005
1445318	rs274486	a	g	99843	-0.041	0.9672	-	++-+++-+-+++-----+----+-+	-6e-04	0.0056
1445319	rs2744866	a	g	99150	1.816	0.0694	+	-++--++--+-+++++-++-+--+?	0.0156	0.0064
1445320	rs2744867	t	c	99900	-0.649	0.516	-	---+---++-+-+--+--++-++++	-0.005	0.0054
1445321	rs2744874	t	c	98406	-1.311	0.19	-	+++-+-+-+---+--++---++--+	-0.0094	0.0072
1445322	rs2744875	c	g	98388	1.951	0.05104	+	+-++++-+-+++-++--+++--+++	0.0097	0.0073
1445323	rs274488	t	c	99900	-0.406	0.685	-	-+----++-++++-+-----+-+-+	-0.0011	0.0052
1445324	rs2744881	a	g	98406	-0.354	0.7231	-	-+-+-+--+---+--+--+-++--+	-0.0027	0.0055
1445325	rs274489	a	g	99900	-0.505	0.6135	-	-+----++-++++-+-----+-+-+	-0.0016	0.0052
1445326	rs2744898	t	c	1940	-0.913	0.3614	-	??????????????-??????????	-0.0386	0.0421
1445327	rs274490	a	g	96781	1.303	0.1926	+	++-+++++++-+---?+-+-++-++	0.0161	0.0119
1445328	rs2744900	a	g	1940	-0.491	0.6236	-	??????????????-??????????	-0.0223	0.0453
1445329	rs2744901	t	c	99896	0.969	0.3323	+	-+-++---++++++--+--+---++	0.009	0.008
1445330	rs2744902	t	g	99900	2.407	0.01609	+	+++----+++++++-+--++----+	0.0173	0.008
1445331	rs2744905	a	g	99900	2.282	0.0225	+	+++----+++++++-+--++----+	0.0166	0.0081
1445332	rs2744907	c	g	99900	-1.774	0.07598	-	----+++---++--+-++--+-++-	-0.0115	0.0078
1445333	rs2744908	t	c	99821	-2.095	0.0362	-	---++++---+---+-++--+-++-	-0.014	0.0077
1445334	rs274491	a	g	99900	-0.394	0.6938	-	-+----+--+--+++-+---++---	-9e-04	0.0052
1445335	rs2744914	a	g	1940	0.356	0.7215	+	??????????????+??????????	0.0155	0.0432
1445336	rs2744918	a	g	99882	1.833	0.06679	+	++++---++++-++-+--++----+	0.0121	0.0077
1445337	rs274492	t	c	96774	1.206	0.2277	+	++-+++++++-+---?+-+-++-++	0.015	0.0119
1445338	rs274493	a	g	91643	1.538	0.124	+	++-+++++++-+---?+-+-++-++	0.0184	0.012
1445339	rs2744937	t	c	99900	-5.694	1.243e-08	-	--+-----++---------------	-0.0341	0.0067
1445340	rs274494	a	g	96781	1.169	0.2424	+	++-+++++++-+---?+-+-++-++	0.0151	0.0119
1445341	rs2744942	t	c	99900	5.551	2.84e-08	+	++-+++-++-++++++++++-++++	0.0339	0.0068
1445342	rs2744943	t	c	1940	1.233	0.2177	+	??????????????+??????????	0.0564	0.0456
1445343	rs2744946	a	g	27155	-0.894	0.3713	-	??+??????????-???--??+???	-0.0556	0.0533
1445344	rs2744949	t	c	99900	-5.089	3.603e-07	-	----+-------------+------	-0.0244	0.0051
1445345	rs274495	c	g	96781	-1.184	0.2365	-	--+-------+-+++?-+-+--+--	-0.0151	0.0119
1445346	rs2744954	a	g	96908	5.552	2.821e-08	+	++-+++-++-++++++++++-++?+	0.0339	0.0069
1445347	rs2744955	c	g	96908	5.395	6.863e-08	+	++-+++-++-++++++++++-++?-	0.0328	0.0069
1445348	rs2744956	t	c	99900	5.533	3.139e-08	+	++-+++-++-++++++++++-++++	0.0336	0.0068
1445349	rs2744957	t	c	99900	5.207	1.924e-07	+	++++-++-++++++++++-++++++	0.025	0.0051
1445350	rs2744961	t	c	99900	-5.487	4.093e-08	-	----+-------------+------	-0.0266	0.0051
1445351	rs2744963	a	g	99890	-4.486	7.255e-06	-	--+++---++----------+----	-0.0226	0.0058
1445352	rs2744964	c	g	99900	-5.509	3.608e-08	-	--+-----++----------+---+	-0.033	0.0067
1445353	rs2744966	a	g	99900	4.431	9.368e-06	+	++---+++--++++++++++-++++	0.0224	0.0058
1445354	rs2744967	t	c	99900	-4.459	8.218e-06	-	--+++---++----------+----	-0.0225	0.0058
1445355	rs2744968	a	c	99900	4.277	1.896e-05	+	++--++-+--++++++++++-++++	0.0215	0.006
1445356	rs2744971	t	g	99900	5.682	1.333e-08	+	++-+++++--+++++++++++++++	0.0341	0.0067
1445357	rs2744972	t	c	98069	-5.692	1.253e-08	-	--+------+--?-------+----	-0.0357	0.0069
1445358	rs2744973	t	c	99900	-5.637	1.729e-08	-	---++--------------------	-0.0295	0.0055
1445359	rs2744974	t	c	99900	-4.968	6.748e-07	-	--++---------------------	-0.0248	0.0054
1445360	rs2744977	a	g	99900	5.691	1.265e-08	+	++-+++++--+++++++++++++++	0.034	0.0067
1445361	rs274498	a	g	90238	0.733	0.4638	+	-+?+-+-----+---?+-+-+-+++	0.0108	0.0162
1445362	rs2744985	a	g	98406	-2.1	0.03573	-	++-++---+----------++----	-0.01	0.0054
1445363	rs274499	a	g	96781	1.601	0.1093	+	++-+++++++-+---?+-+-++-++	0.0174	0.0116
1445364	rs2744998	a	g	98409	-0.829	0.4069	-	+--+--+-----++--++-+++-++	-0.004	0.005
1445365	rs27450	a	g	99900	0.955	0.3394	+	------+++--+++++----++++-	0.0073	0.0066
1445366	rs274500	t	c	96735	1.504	0.1325	+	-+-+--+-++-+++-?+-+-+++++	0.0164	0.0103
1445367	rs2745001	a	g	98293	0.817	0.414	+	-++-++-++-++---+--+--+---	0.0041	0.0051
1445368	rs2745002	c	g	98409	1.119	0.2633	+	-++-++-+++++--++--+---+--	0.0056	0.0051
1445369	rs2745007	a	g	10240	-0.408	0.6832	-	?????????????-??????--???	-0.0075	0.0169
1445370	rs2745008	t	c	96824	-0.725	0.4684	-	-+++++-----+-----+++-++?+	-0.0036	0.0051
1445371	rs274501	a	g	90231	-0.729	0.4659	-	+-?-+-+-+++--++?-+-+-+---	-0.0107	0.0161
1445372	rs2745015	t	c	83550	0.065	0.9481	+	?-+-++++??++---?+-??-+---	0.0013	0.0082
1445373	rs274502	a	t	90217	0.648	0.5171	+	-+?+-+-+---+---?+-+-+-+++	0.0091	0.0162
1445374	rs274503	a	g	90234	0.669	0.5036	+	-+?+-+-+---++--?+-+-+-+++	0.0102	0.0162
1445375	rs274504	t	c	99892	-0.329	0.7425	-	-+----+--+--+++-++--++---	-5e-04	0.0053
1445376	rs274505	c	g	99900	-0.55	0.5825	-	-+----+--+--++--++--++---	-0.0017	0.0053
1445377	rs2745054	t	c	86415	1.037	0.2998	+	--++-++--+++--+++-?+++-+-	0.0074	0.0057
1445378	rs274506	a	t	90238	-0.64	0.5224	-	+-?-+-+++++-+++?-+++-+---	-0.0103	0.0163
1445379	rs2745061	t	c	98374	0.11	0.9121	+	--+++---++++--+-+-+-++-+-	0	0.0072
1445380	rs2745062	t	g	2438	-1.716	0.08621	-	????????????????????--???	-0.0573	0.0332
1445381	rs2745065	t	c	73741	-0.095	0.9245	-	?-+++-????+---+?+-??++??-	-0.002	0.0185
1445382	rs2745070	a	t	92683	-0.497	0.6195	-	-----+-+-+-+-+-+-+?+-+-?-	-0.0146	0.0181
1445383	rs2745076	t	g	34538	0.359	0.7197	+	?--?---+????++??+++-??+-?	0.0016	0.0094
1445384	rs2745078	t	c	98409	0.613	0.5402	+	+-++---+-+++-+--+--++-+--	9e-04	0.0049
1445385	rs274508	a	c	99900	0.677	0.4984	+	+-++++-++-++--++--++--+++	0.0024	0.0053
1445386	rs2745084	a	g	83096	0.363	0.7167	+	++-?-+++??+-+--++-?---+--	0.0018	0.0073
1445387	rs2745098	t	c	38552	-1.146	0.2516	-	-??-??????+??---????+-??-	-0.0084	0.0091
1445388	rs27451	a	g	10225	-0.685	0.4932	-	?????????????-??????--???	-0.0114	0.0166
1445389	rs274510	t	c	90238	0.744	0.4571	+	-+?+-+-----+--+?+---+-+++	0.0118	0.0163
1445390	rs2745101	a	g	7807	-0.036	0.971	-	?????????????-???????????	-8e-04	0.0225
1445391	rs2745103	t	c	38552	-1.504	0.1325	-	-??-??????+??+--????+-??-	-0.0155	0.0097
1445392	rs2745106	t	c	97688	-1.018	0.3085	-	--+--+-+-++--+---+-++--++	-0.0079	0.0088
1445393	rs2745107	t	c	36612	1.186	0.2356	+	+??+??????-??-?+????-+??+	0.0093	0.01
1445394	rs274511	a	g	88298	0.687	0.4924	+	-+?+-+-+---++-??+-+-+-+++	0.0128	0.0169
1445395	rs2745111	t	c	13579	-0.31	0.7563	-	??????????-??--?????+-???	-0.0061	0.026
1445396	rs2745118	t	c	62000	0.574	0.5662	+	+-??++?????+?+--+-?+????-	0.006	0.024
1445397	rs274512	t	c	99866	-1.047	0.2952	-	-+----+-----++--++--++---	-0.0046	0.0052
1445398	rs2745129	a	g	69587	1.084	0.2782	+	++??-+?????+?++-+-?--+??-	0.006	0.0072
1445399	rs2745132	t	c	1940	-0.73	0.4652	-	??????????????-??????????	-0.0295	0.0402
1445400	rs274514	a	g	99870	0.954	0.3399	+	--++++-+++-+-++++-++----+	0.005	0.0052
1445401	rs2745145	a	g	87280	-0.258	0.7965	-	+++?-+++??+-+--+------+--	3e-04	0.0069
1445402	rs274515	c	g	99880	1.179	0.2385	+	-+--+++++-+++++++-+--+++-	0.0111	0.0088
1445403	rs2745167	t	c	59297	0.267	0.7895	+	-???-+?????+?+--+-?-????-	0.002	0.0071
1445404	rs2745170	t	g	1940	-0.201	0.8405	-	??????????????-??????????	-0.0091	0.0449
1445405	rs2745189	t	c	98409	-1.426	0.1538	-	++-+++-++--+---+-+---+-+-	-0.0129	0.0072
1445406	rs274519	c	g	98409	-0.771	0.4409	-	++-+++-++----+-+-++------	-0.0047	0.0055
1445407	rs27452	a	g	99900	-1.37	0.1707	-	+-+--+-+-------++-+-+-++-	-0.0084	0.0054
1445408	rs274520	a	g	98314	0.513	0.6077	+	+++--+-++++++++--+-++++--	0.0047	0.01
1445409	rs2745217	t	c	10245	-0.044	0.9646	-	?????????????-??????++???	-1e-04	0.016
1445410	rs2745220	a	t	10230	1.506	0.1321	+	?????????????+??????+-???	0.0294	0.02
1445411	rs2745222	t	g	99900	-0.381	0.703	-	++--++---+++---+++--++---	-0.0046	0.0069
1445412	rs274524	c	g	98409	1.056	0.2908	+	++++++-++-++-+-+++------+	0.0048	0.006
1445413	rs2745245	a	c	99900	-0.954	0.3399	-	-++-+--+++--+-+--++-+-+++	-0.009	0.0077
1445414	rs274525	t	c	98409	0.721	0.4706	+	---+-++--+-++++-----++-++	0.0045	0.005
1445415	rs2745251	t	c	99900	0.03	0.9759	+	-+----+---++-+-+-+-+-+--+	0.0018	0.0054
1445416	rs2745252	t	c	99900	0.446	0.6557	+	-++-++-+-+++++---++-++++-	0.0042	0.0102
1445417	rs2745255	c	g	99835	-0.504	0.6146	-	--+++-+-+++++-+++--++----	-5e-04	0.005
1445418	rs274526	t	c	98409	0.718	0.4725	+	++++++-++-++-+-+++------+	0.0035	0.006
1445419	rs2745260	t	c	99855	-0.265	0.7911	-	++--+-+++--+--++++--+--+-	6e-04	0.0073
1445420	rs2745265	t	c	99900	0.286	0.7746	+	++-++-+++--+---+--+++----	7e-04	0.0051
1445421	rs2745267	a	g	7807	1.443	0.1489	+	?????????????+???????????	0.0295	0.0203
1445422	rs2745275	a	g	99899	-0.58	0.5622	-	---+--+--++-+-+++-+++++--	-0.0021	0.0085
1445423	rs2745276	a	g	99726	-0.006	0.9949	-	--++-+++-++-+--+--+--++--	0.0027	0.0081
1445424	rs2745282	t	g	99857	0.149	0.8814	+	++--+-+++-++-----++++--++	-2e-04	0.0056
1445425	rs2745285	t	c	92059	0.503	0.6151	+	+?--+-+++-++-----++++--++	0.002	0.0054
1445426	rs2745291	a	g	99881	-0.164	0.87	-	--++-+---++-++-+--+--++--	-9e-04	0.006
1445427	rs2745292	a	g	10220	0.592	0.5538	+	?????????????+??????-+???	0.0121	0.0197
1445428	rs27453	a	g	99867	1.609	0.1076	+	-+-+-++-+++++++--+++-+-++	0.0184	0.0099
1445429	rs2745300	a	g	92597	0.838	0.4021	+	-+++---+-+++-+-?++?+-+--+	0.0106	0.0119
1445430	rs2745302	a	g	99893	0.695	0.4868	+	+--++-+-+--++-+++++++++++	0.0042	0.0055
1445431	rs2745303	a	g	99150	-0.209	0.8341	-	+---+-+++--++-++++-+++++?	-0.0012	0.0113
1445432	rs2745304	t	c	99900	-0.406	0.6848	-	+-+-++---+++---+--+------	-0.0039	0.0063
1445433	rs2745307	a	t	99179	-0.191	0.8482	-	++----+-++-+-+-+--+--++++	7e-04	0.016
1445434	rs2745311	a	c	99900	-1.361	0.1737	-	++--+++---+-----+-++---++	-0.0084	0.0055
1445435	rs2745317	a	g	99900	-1.39	0.1645	-	+---+++---+----++-++---++	-0.0083	0.0052
1445436	rs2745318	a	g	99829	1.269	0.2045	+	-+++---+++-++++--+--+++--	0.0078	0.0052
1445437	rs2745319	a	g	99900	-1.372	0.1699	-	+---+++---+----++-++---++	-0.0082	0.0051
1445438	rs2745320	a	g	96908	-1.484	0.1379	-	+---+++---+----++-++---?+	-0.0086	0.0051
1445439	rs2745322	a	c	99900	-1.7	0.08905	-	+----++-+-+-----+-+++-+++	-0.0108	0.0065
1445440	rs2745324	t	c	99900	1.684	0.09219	+	-++++--+-+-++++--++--+---	0.0107	0.0065
1445441	rs2745325	a	c	99900	-1.537	0.1242	-	+---+++---+-----+-++---++	-0.0088	0.0052
1445442	rs2745327	a	g	99900	1.802	0.07162	+	-++++--+-+-++++--++--+---	0.0111	0.0064
1445443	rs2745328	c	g	99900	2.085	0.03706	+	-++++--+-+-++++--++--+--+	0.0132	0.0065
1445444	rs2745329	a	t	89256	0.455	0.6492	+	+++++----+?-++??-+?-+---+	0.0056	0.0108
1445445	rs274533	a	t	1067	-0.488	0.6255	-	????????????????????-????	-0.0402	0.082
1445446	rs2745331	c	g	94625	1.088	0.2766	+	++?+-+++---+----+--+--+?+	0.0093	0.0091
1445447	rs2745334	t	c	90441	-1.27	0.2041	-	--?-+---+++-++++-+?-++-?+	-0.0126	0.0099
1445448	rs2745337	t	c	19106	1.225	0.2205	+	??-+???+?????????-+??????	0.0715	0.057
1445449	rs2745338	t	c	13853	-1.433	0.1519	-	??+-?????????????+-??????	-0.0987	0.0671
1445450	rs2745339	a	c	13853	1.436	0.1511	+	??-+?????????????-+??????	0.0989	0.0671
1445451	rs274534	a	g	98409	-0.935	0.35	-	---+++-+-----+-+++-----+-	-0.0054	0.006
1445452	rs2745341	t	c	13853	-1.439	0.15	-	??+-?????????????+-??????	-0.0989	0.0671
1445453	rs2745342	a	t	27696	0.068	0.9457	+	??+-?????????+???+-??????	-0.0033	0.0499
1445454	rs2745343	t	c	13853	1.441	0.1495	+	??-+?????????????-+??????	0.099	0.0671
1445455	rs2745344	t	c	12448	-1.781	0.07491	-	???-?????????????+-??????	-0.1209	0.0696
1445456	rs2745345	a	g	2669	0.939	0.3479	+	?????????????+???????????	0.1845	0.1957
1445457	rs2745346	t	c	12448	1.783	0.07465	+	???+?????????????-+??????	0.1213	0.0696
1445458	rs2745347	a	c	99876	4.623	3.784e-06	+	++++-+---+++++++--+++++-+	0.0207	0.0054
1445459	rs2745349	a	c	99665	4.646	3.384e-06	+	++++-+---+++++++--+++++-+	0.0208	0.0054
1445460	rs274535	a	g	98409	-0.627	0.5309	-	-++----++--++-+-----++-++	-0.0028	0.0049
1445461	rs2745350	t	c	12448	1.752	0.07982	+	???+?????????????-+??????	0.1197	0.0698
1445462	rs2745353	t	c	99900	-3.863	0.0001118	-	------++--+-----+-+-+--++	-0.0162	0.0049
1445463	rs2745354	t	g	99900	-0.507	0.6125	-	--+------+++-+++--+-+---+	-0.0015	0.0055
1445464	rs2745359	t	c	28355	2.675	0.007466	+	+??+??????-??+??????++??+	0.0659	0.0283
1445465	rs274536	a	g	96879	0.392	0.6951	+	+++--+--+++++-+--+-++-+?-	0.0023	0.0098
1445466	rs2745364	t	c	99900	-0.182	0.8555	-	-+---++--++++++-++---+--+	0.0026	0.0056
1445467	rs2745366	a	c	99900	0.324	0.7463	+	+++-++--++-++-+----++-++-	-9e-04	0.0052
1445468	rs2745367	c	g	99900	-0.175	0.8611	-	+++-+-++-+--+---+-+-+++--	-0.0019	0.005
1445469	rs274537	a	g	98102	0.234	0.8153	+	+++----++++-+-+-++-+++++-	0.0021	0.0081
1445470	rs2745379	t	c	99708	-0.522	0.6015	-	--+++-+-+---+-++-+---++--	-2e-04	0.0049
1445471	rs274538	t	c	98409	-0.43	0.6672	-	++--++-++-+--+-+++++--+--	-0.0034	0.0051
1445472	rs2745380	t	c	99900	-0.72	0.4713	-	--+++-+-+---+-++-+---++--	-0.0015	0.0049
1445473	rs2745381	t	c	99900	-0.779	0.4362	-	--+++-+-+---+-++-+---++--	-0.0016	0.005
1445474	rs2745382	t	c	99900	0.641	0.5213	+	++---+-+-+++----+-+++--++	0.0012	0.0049
1445475	rs2745384	a	t	99862	-0.463	0.6436	-	--+++-+-+---++++-+---++--	-1e-04	0.0049
1445476	rs2745385	a	t	99900	-0.499	0.6178	-	--+++-+-+---++++-+---++--	-3e-04	0.0049
1445477	rs2745389	c	g	7807	0.058	0.9539	+	?????????????+???????????	0.0013	0.0225
1445478	rs274539	t	g	10255	-0.331	0.7407	-	?????????????-??????++???	-0.0047	0.0158
1445479	rs27454	t	g	36612	0.022	0.9827	+	+??-??????-??+?+????++??-	4e-04	0.0106
1445480	rs274540	t	c	95250	0.154	0.8775	+	-++++--++---++-?+--+-+++-	0.0016	0.0097
1445481	rs2745400	a	g	99900	1.66	0.09693	+	+++-++-+-+++++--++-+-++++	0.0057	0.005
1445482	rs2745401	a	g	99900	1.409	0.1588	+	+++-++-+-+++++--++---++++	0.0051	0.005
1445483	rs2745403	a	g	99900	1.569	0.1165	+	+++-++-+-+++++--+--+-++++	0.0053	0.0049
1445484	rs2745406	t	c	99900	1.62	0.1052	+	+++-++-+-+++++--+--+-++++	0.0055	0.0049
1445485	rs2745407	t	c	99900	0.126	0.9	+	+++-++-------+--+-+++++++	-8e-04	0.0054
1445486	rs2745409	a	g	99900	-1.169	0.2426	-	---+--+-+-+---++-+-++----	-0.0033	0.0049
1445487	rs2745411	a	g	99900	-1.965	0.04945	-	---+--+-+-----++----+----	-0.0069	0.0049
1445488	rs2745412	t	c	95716	0.181	0.856	+	+-+-+++-++++----+-?+++++-	0.0016	0.009
1445489	rs2745419	a	t	99900	-0.974	0.33	-	+----++-----++++--++++-++	-0.0059	0.005
1445490	rs274542	t	c	98363	-1.264	0.2063	-	-+---++---+---++++++-++--	-0.0047	0.0051
1445491	rs2745420	a	g	99875	-0.889	0.3741	-	+----++-----++++--++++-++	-0.0055	0.005
1445492	rs2745421	t	c	7807	-0.268	0.7886	-	?????????????-???????????	-0.0055	0.0203
1445493	rs2745422	c	g	99900	1.003	0.316	+	-++++---++++++--++----+--	0.0063	0.005
1445494	rs2745425	t	c	92597	-1.756	0.07913	-	+-----+++-----+?--?+++---	-0.0155	0.0097
1445495	rs2745426	t	c	99883	0.087	0.9306	+	+-----+++-----++--++-+-++	1e-04	0.0054
1445496	rs2745427	a	c	96908	0.035	0.9724	+	+-----+++-----++--++-+-?+	-1e-04	0.0055
1445497	rs2745428	a	c	99900	-0.536	0.592	-	+----++++-----++---+--+++	-0.002	0.0058
1445498	rs2745429	a	t	96908	0.027	0.9787	+	+-----+++-----++--++-+-?+	-2e-04	0.0055
1445499	rs2745431	c	g	99900	-0.331	0.7405	-	+-----+++-----++--++-+-+-	-0.0027	0.0057
1445500	rs2745432	a	g	99880	0.108	0.9141	+	+--+---++----+++--++-++++	-0.0013	0.0053
1445501	rs2745434	a	t	99900	0.086	0.9317	+	+--+---++----+++--+++++++	-0.0013	0.0053
1445502	rs2745436	a	g	96908	0.788	0.4307	+	+-----+++------+--++++-?+	0.0034	0.0051
1445503	rs2745437	t	c	7807	-0.471	0.638	-	?????????????-???????????	-0.0088	0.0186
1445504	rs2745438	a	g	99900	-0.546	0.5852	-	+------++-----+++-++++++-	-0.0039	0.0051
1445505	rs2745439	a	g	7807	0.421	0.6734	+	?????????????+???????????	0.0078	0.0185
1445506	rs2745440	a	g	99900	0.433	0.6647	+	+-----+++-----++--++-+-++	0.0021	0.0054
1445507	rs2745441	a	g	99857	1.203	0.2291	+	+-----+++--+-+-+--++++-++	0.0051	0.0051
1445508	rs2745442	a	g	99862	1.122	0.2621	+	++----+++----+-+--++++-++	0.0051	0.0053
1445509	rs2745443	t	c	99792	-1.158	0.2467	-	-+++++---++-+-+-++----+--	-0.005	0.0051
1445510	rs2745444	t	c	99900	-1.202	0.2294	-	-+++++---++-+-+-++----+--	-0.0052	0.0051
1445511	rs2745445	t	c	99900	-1.194	0.2325	-	-+++++---++-+-+-++----+--	-0.0051	0.0051
1445512	rs2745451	t	c	99900	-0.693	0.4885	-	----++---++---++++--+++--	-0.0041	0.0053
1445513	rs2745452	a	g	99900	0.521	0.6022	+	+++---+-+--+++----++---++	0.0029	0.0054
1445514	rs2745454	a	g	7807	-0.983	0.3254	-	?????????????-???????????	-0.0369	0.0374
1445515	rs274546	a	g	96908	-2.199	0.02786	-	-----++-+-++--++++--+--?-	-0.009	0.005
1445516	rs2745460	c	g	99900	-0.614	0.5393	-	-------++++++-++----++--+	-0.0032	0.0056
1445517	rs2745461	t	c	99822	-0.476	0.6338	-	+-----+++++--++-++-+---+-	-0.0039	0.0068
1445518	rs2745462	a	g	99900	0.488	0.6252	+	-++++------++--+--+-+-+-+	0.0044	0.0068
1445519	rs2745465	a	g	96781	-0.517	0.6049	-	-+--+--+-+----+?-+-+--+-+	-0.0049	0.0156
1445520	rs274547	a	t	99874	2.969	0.00299	+	-++++--+++-+++++--+++-+++	0.0165	0.0066
1445521	rs2745470	t	c	99900	-0.032	0.9748	-	-+--++++--+-+-+++-+++----	0.0015	0.0049
1445522	rs2745471	a	g	1940	-0.95	0.3422	-	??????????????-??????????	-0.0426	0.0447
1445523	rs2745477	a	g	10254	0.599	0.5491	+	?????????????+??????--???	0.0105	0.0196
1445524	rs274548	t	c	37802	0.829	0.4072	+	-??+??????-??+-+????+-???	0.0136	0.012
1445525	rs2745480	t	c	99900	-1.656	0.09764	-	+--+---+-----+--++++---++	-0.0145	0.0069
1445526	rs2745481	t	c	99900	-1.236	0.2165	-	-----++--+--++--+++------	-0.006	0.006
1445527	rs2745486	a	g	10227	0.93	0.3525	+	?????????????+??????++???	0.0184	0.0199
1445528	rs2745487	a	g	96735	0.952	0.3412	+	-++-+++--++++-++----+++?-	0.0092	0.0071
1445529	rs274549	a	c	99099	2.829	0.004676	+	-++++--+++-+++++--+++-++?	0.0172	0.0072
1445530	rs2745491	t	g	99882	-0.454	0.6499	-	++-+---+-----+-+++----+++	-0.0055	0.0055
1445531	rs2745492	a	g	99900	-1.461	0.1439	-	-----++--+--++--+++------	-0.0073	0.0058
1445532	rs274550	t	g	99900	-2.605	0.009191	-	+----++---+-----++---+---	-0.0145	0.0066
1445533	rs274551	t	c	95242	2.681	0.007345	+	-++++--+++-+?+++--+++-+?+	0.0157	0.0069
1445534	rs274552	c	g	96884	-2.721	0.006513	-	+----++---+-----++---+-?+	-0.0151	0.0068
1445535	rs2745523	a	g	86738	1.241	0.2145	+	+-++++--+--+-++?-+?+--+++	0.0125	0.0182
1445536	rs274553	c	g	36612	-0.823	0.4103	-	+??-??????+??-?-????-+??+	-0.0146	0.0124
1445537	rs2745530	c	g	7807	-1.069	0.2851	-	?????????????-???????????	-0.0243	0.0227
1445538	rs2745537	t	c	99883	-0.664	0.5064	-	++---+--+-----++-+-++---+	-0.0053	0.0058
1445539	rs2745538	t	c	10245	0.155	0.877	+	?????????????+??????-+???	0.0028	0.0181
1445540	rs274554	t	c	98276	2.745	0.006048	+	-++++--+++-+?+++--+++-+++	0.015	0.0068
1445541	rs2745543	a	g	7807	0.198	0.8433	+	?????????????+???????????	0.0066	0.0334
1445542	rs2745553	c	g	92045	-0.588	0.5566	-	+?--+-++-------+--+-+++-+	-0.0041	0.007
1445543	rs2745555	a	t	99900	-0.952	0.3412	-	+---+-+++------++---+-+-+	-0.0056	0.0073
1445544	rs2745557	a	g	99900	0.195	0.8453	+	-++++-------+--+-++++-++-	6e-04	0.0068
1445545	rs2745559	a	c	99900	0.349	0.7272	+	-++++-------++-+-++++-++-	0.0017	0.0068
1445546	rs2745562	t	c	98406	1.838	0.066	+	++-+-+-+-+-++++++++--+---	0.013	0.009
1445547	rs2745563	t	c	99900	-0.273	0.785	-	+--++-+++---+----++++-+-+	-0.003	0.0067
1445548	rs2745564	c	g	99900	1.046	0.2957	+	++--++-+++++----+----++--	0.0052	0.0051
1445549	rs2745566	t	c	99897	0.488	0.6259	+	-+++-++--+++-+-+-+++--+--	0.0039	0.0056
1445550	rs2745567	a	c	99837	-0.067	0.9464	-	--+++++--+++-+-+-+---++-+	0.0019	0.0051
1445551	rs274557	t	c	99900	2.234	0.02546	+	+++++--+-+--++----++-++-+	0.0095	0.005
1445552	rs2745571	a	g	9747	0.205	0.8378	+	?????????????+-??????????	0.0043	0.0177
1445553	rs2745575	a	g	22041	1.142	0.2536	+	???????????+?????????????	0.034	0.0298
1445554	rs2745577	c	g	95716	0.845	0.3983	+	++++---++--+-+++-+?----++	0.0031	0.0056
1445555	rs2745578	a	g	65243	-0.077	0.9387	-	+--?--+????+?-??-+?0+-?+-	-0.0055	0.0194
1445556	rs2745579	a	t	96060	-2.469	0.01356	-	+----++-++-----?-----++-+	-0.0181	0.0096
1445557	rs274558	a	g	99900	2.038	0.04158	+	+++++--+-+--++----++-++-+	0.0087	0.005
1445558	rs2745580	t	c	94390	2.279	0.02265	+	-++++--+--++?++?+++++--+-	0.0158	0.0095
1445559	rs2745581	a	g	91717	-1.451	0.1467	-	--+-+++-??--+--+--?--++-+	-0.0066	0.0066
1445560	rs274559	a	g	99899	2.263	0.02366	+	+++++--+-+--++----++-++-+	0.0096	0.005
1445561	rs2745593	a	g	90316	-1.581	0.1138	-	--+-++++???-+--+--?--++-+	-0.0083	0.0058
1445562	rs27456	a	c	99637	1.024	0.3059	+	-+-----+-+-+++-+++++--++-	0.0041	0.005
1445563	rs274560	t	c	96908	2.23	0.02572	+	+++++--+-+--++----++-++?+	0.0093	0.005
1445564	rs2745603	t	c	1940	-0.662	0.5077	-	??????????????-??????????	-0.0307	0.0463
1445565	rs274561	a	c	99847	-2.12	0.03399	-	-----++-+-++--++++--+--+-	-0.0089	0.005
1445566	rs2745610	c	g	99826	0.603	0.5467	+	--+++-++--++-+-+----++---	0.0045	0.0055
1445567	rs2745611	t	c	99900	0.675	0.4998	+	++--++-++-+++---+----++--	0.0037	0.0052
1445568	rs2745612	t	c	99900	0.049	0.9611	+	++--+-++++-++---+----+--+	8e-04	0.0053
1445569	rs2745614	a	c	10216	-0.883	0.3771	-	?????????????-??????--???	-0.0282	0.0313
1445570	rs2745615	t	c	99900	0.081	0.9354	+	+-++-++-+---++-+-+++---+-	0	0.009
1445571	rs2745619	a	g	43862	0.748	0.4545	+	?-??+++????+-???+-?-???-?	0.0347	0.0366
1445572	rs274562	c	g	99900	-2.101	0.03567	-	-----++-+-++--++++--+--+-	-0.0087	0.005
1445573	rs2745621	a	t	43862	-0.749	0.454	-	?+??---????-+???-+?+???+?	-0.0349	0.0367
1445574	rs2745625	a	g	96622	0.208	0.835	+	+-+-+++-??----+++++----+-	0.0061	0.0088
1445575	rs2745636	t	g	99864	-0.611	0.5411	-	--++-+-++--+---+-+-++---+	-0.0036	0.0049
1445576	rs2745639	a	g	99900	-1.059	0.2897	-	---++-----+----+++-++----	-0.004	0.005
1445577	rs2745642	t	c	99900	-0.681	0.4957	-	+-+-+-+-++-+------+---+++	-0.0071	0.0072
1445578	rs2745643	c	g	99900	-1.385	0.1662	-	--+-+---+++----+--++---++	-0.0064	0.0049
1445579	rs2745644	t	c	99900	-0.852	0.394	-	+-+-+-+-++-+------+---+++	-0.0082	0.0072
1445580	rs2745645	a	g	99900	-0.866	0.3863	-	+-+-+-+-++-+------+---+++	-0.0083	0.0072
1445581	rs2745646	t	c	99900	1.614	0.1066	+	++-+-+++---++++-++--+++-+	0.0075	0.0049
1445582	rs2745647	t	c	99900	1.7	0.08906	+	++-+-+++---++++-++--+++-+	0.0079	0.0049
1445583	rs2745650	t	g	99900	0.699	0.4846	+	-+-+-+-+--+-++++++-+++---	0.0072	0.0071
1445584	rs2745655	a	c	99900	1.823	0.06827	+	++-+-+-+---++++-+++-+++-+	0.008	0.0049
1445585	rs2745660	a	g	99900	-0.878	0.3799	-	+---++-------+--+--++++--	-0.0095	0.0089
1445586	rs274567	t	c	96896	-2.296	0.02168	-	-----++-+-++--++++--+--?-	-0.0095	0.005
1445587	rs274570	t	c	99086	-2.69	0.007152	-	-----++---+---++----+--+?	-0.015	0.0063
1445588	rs274571	t	c	1940	0.631	0.5278	+	??????????????+??????????	0.0286	0.0451
1445589	rs2745726	a	g	85968	-0.131	0.8957	-	+--++-+--++--+-?++?+---+-	-0.0071	0.0167
1445590	rs2745729	a	c	98391	0.77	0.4413	+	-++-++++++-+-+----+---+--	0.0068	0.0063
1445591	rs2745731	a	c	98409	-0.168	0.8664	-	--+-+--+--+-++++++-++--++	-0.0022	0.0068
1445592	rs2745739	t	c	99900	-0.428	0.6687	-	+-+---+--+-+-++++-+++---+	-3e-04	0.005
1445593	rs2745745	t	c	99900	-0.44	0.6602	-	+-+---+--+-+-++++-+++---+	-1e-04	0.0052
1445594	rs2745747	t	c	99900	-0.66	0.5092	-	+-+---+--+---++-----++--+	-5e-04	0.005
1445595	rs2745748	a	c	99900	-0.572	0.5673	-	--++-++--+---++--+--++--+	0.0015	0.0051
1445596	rs2745749	a	c	10238	0.448	0.6543	+	?????????????+??????++???	0.008	0.0171
1445597	rs2745750	c	g	99900	-0.048	0.9618	-	+-++--+----+-+++-++++--++	0.0019	0.0054
1445598	rs2745751	a	c	99900	-0.384	0.7012	-	+-+---+--+---++--+--++--+	0.0014	0.0051
1445599	rs2745755	a	g	98342	1.215	0.2243	+	+++++-++-++--+-++---+--++	0.0062	0.0051
1445600	rs2745756	t	c	97642	-1.575	0.1152	-	-++------++-+-+++-+-+-++?	-0.0088	0.006
1445601	rs274576	a	g	98099	-1.662	0.09656	-	-+--?-++---+--+----+++---	-0.0164	0.0171
1445602	rs2745763	a	t	98409	-2.898	0.00375	-	-+---++--+--+-+---+--+---	-0.0166	0.0066
1445603	rs2745764	t	c	90429	1.156	0.2478	+	+?+++-++-+++-+-++---+--++	0.0059	0.0053
1445604	rs2745769	t	g	98409	1.394	0.1633	+	+++++-++-+++-+-++---+--++	0.0069	0.0051
1445605	rs2745771	a	c	95290	-0.553	0.5803	-	----++--++--++-?-++-+-+-+	-0.0083	0.0133
1445606	rs2745772	a	c	94225	-0.11	0.9122	-	++--+-+-++++---+++?++--++	-0.0029	0.0078
1445607	rs2745775	a	g	98409	0.627	0.5305	+	++++--++--++-++-+-++-+-+-	0.0084	0.0128
1445608	rs2745776	t	c	98409	1.016	0.3099	+	++--+-++++++-+-+++-----++	0.0047	0.0055
1445609	rs2745784	a	c	98409	-1.131	0.2579	-	--++-+------+-+---+++++--	-0.0052	0.0055
1445610	rs2745787	t	g	98409	-1.712	0.08687	-	-+---+---++++-++--+-+-+-+	-0.0101	0.0062
1445611	rs2745790	t	c	97659	-0.681	0.496	-	-----+--++-++--+-++-+-+-?	-0.0084	0.0127
1445612	rs2745796	t	c	2447	-0.854	0.3933	-	????????????????????+-???	-0.1131	0.1219
1445613	rs2745799	a	g	1718	-0.446	0.6556	-	????????????????????+-???	-0.0657	0.144
1445614	rs27458	a	t	99896	-0.989	0.3225	-	+-++-+-+---+--+-+--+-+--+	-0.0067	0.0049
1445615	rs274580	t	c	99900	-0.193	0.8467	-	++-------++-+++---++----+	-0.0067	0.0084
1445616	rs2745800	t	c	2426	-1.793	0.07299	-	????????????????????--???	-0.0642	0.0357
1445617	rs2745802	c	g	45194	1.346	0.1784	+	??-??+?????+?+??++????-?+	0.0701	0.0478
1445618	rs2745803	a	g	84193	0.252	0.801	+	---+-++???+-+--++-?+---?-	0.0042	0.0086
1445619	rs2745807	t	c	64775	0.573	0.5665	+	?-??-+-?-+-+?+??--+-????+	0.0141	0.0236
1445620	rs2745809	t	c	98409	0.302	0.7623	+	+-+--+---+-+-++--++--++-+	0.0013	0.007
1445621	rs274581	t	c	99900	0.066	0.9472	+	-+-+--++++++-++----+++-+-	0.0015	0.0096
1445622	rs2745815	a	g	98409	0.795	0.4268	+	+--++--+-++--+--++++--+-+	0.0023	0.0051
1445623	rs2745816	t	c	98409	-1.6	0.1095	-	--+--++-++--+--++-+-+--+-	-0.0071	0.005
1445624	rs2745817	t	c	96908	-1	0.3174	-	-+--+++-+--++-++----++-?-	-0.0033	0.0051
1445625	rs2745820	t	c	98364	0.419	0.6749	+	+--+--++++-++--++-+++---+	0.0029	0.0051
1445626	rs2745821	t	g	98381	0.336	0.7368	+	+--+--++++-++--++-+++---+	0.0023	0.0051
1445627	rs2745822	t	c	9332	0.854	0.393	+	?????????????+??????++???	0.0163	0.0183
1445628	rs2745826	a	t	7807	-0.73	0.4656	-	?????????????-???????????	-0.0161	0.022
1445629	rs274583	t	c	99900	0.151	0.8804	+	--+++++++--+---+++--++++-	0.0063	0.0084
1445630	rs2745831	t	c	98409	-0.742	0.4581	-	+++-----++--+-+-+-+--+-+-	-0.011	0.0085
1445631	rs2745833	t	c	98409	-1.081	0.2799	-	--+--+--++-----+----++++-	-0.0057	0.0052
1445632	rs2745834	t	c	98409	-0.23	0.8179	-	-++-+++++-----+--++--++++	8e-04	0.0052
1445633	rs2745835	a	g	98409	-0.343	0.7315	-	--+-++++++---++--++--++-+	4e-04	0.0056
1445634	rs2745836	t	c	98409	-0.356	0.7219	-	--+-++++++---++--++--++-+	4e-04	0.0056
1445635	rs2745844	t	c	98409	-0.264	0.7914	-	+-++-+--+++-+-++---++-++-	-0.0064	0.0144
1445636	rs274585	a	g	72458	-2.021	0.0433	-	-+??----?-+-?-??++?+????-	-0.0443	0.022
1445637	rs2745851	a	g	98401	-0.289	0.7726	-	++-+----++-+++-++---++-+-	-0.0021	0.0053
1445638	rs274586	c	g	99900	-0.281	0.7783	-	+--+----+++---+-+-+-++-++	-0.0038	0.005
1445639	rs2745865	t	c	92483	1.515	0.1298	+	+++++--+---+-+??+++--++--	0.004	0.0084
1445640	rs274587	a	g	99900	0.148	0.8825	+	-++-++++---+++-+-+-+--+--	0.0032	0.0049
1445641	rs2745875	a	c	39359	-0.063	0.9501	-	???????????-?+???-??+????	-0.0101	0.069
1445642	rs2745876	a	t	99900	0.904	0.3659	+	---++---++++++++++++++-++	0.0051	0.0063
1445643	rs2745877	t	c	38648	-0.255	0.7986	-	???????????-?+???-???????	-0.0241	0.0693
1445644	rs2745878	t	c	99900	2.496	0.01254	+	++++++-++-+++++--+--++++-	0.0163	0.0073
1445645	rs2745879	t	c	99900	2.455	0.01409	+	++++++-++-+++-+--+--++++-	0.0156	0.0071
1445646	rs274588	t	g	99900	-0.102	0.9191	-	-++-++++---+++-+-+-+--+--	0.0016	0.0049
1445647	rs2745880	t	c	94762	-0.807	0.4198	-	-+--+--++---+-+--+++++-++	-0.0121	0.0156
1445648	rs2745882	t	c	94762	0.734	0.463	+	+-++-++--+++-+-++--0--+--	0.011	0.0156
1445649	rs2745883	t	c	99900	-1.169	0.2426	-	--+---+-+++--+--+-++-+-+-	-0.006	0.0054
1445650	rs2745885	a	g	96902	-2.8	0.005106	-	------+--+-----++-++---?+	-0.0183	0.0073
1445651	rs2745886	t	g	96908	-2.325	0.02008	-	------+--+---+-++-++---?+	-0.0152	0.0072
1445652	rs2745888	a	t	99900	-0.942	0.3461	-	--+---+-+++--+--+-++-+-++	-0.0048	0.0055
1445653	rs2745899	c	g	99879	0.766	0.444	+	++---++++--++-++--++-++-+	0.0035	0.005
1445654	rs27459	a	g	99900	-1.768	0.07709	-	------+--+--+++--++-+--+-	-0.008	0.005
1445655	rs2745906	c	g	99900	1.785	0.0743	+	++++---+-+-+-+-+-+++--+++	0.0083	0.0062
1445656	rs2745915	t	c	99886	-1.577	0.1148	-	----+++++-+++-+-+---++--+	-0.0075	0.0061
1445657	rs2745919	a	g	7807	-0.107	0.9147	-	?????????????-???????????	-0.0021	0.0193
1445658	rs2745920	a	g	99900	-0.173	0.8626	-	++---++-++---+-+----++--+	8e-04	0.0054
1445659	rs2745929	t	c	10200	0.57	0.569	+	?????????????+??????+-???	0.0089	0.016
1445660	rs2745930	t	c	99900	2.323	0.02018	+	-++++-+++++++++-++-+---++	0.0191	0.0072
1445661	rs2745933	t	c	99900	0.755	0.4504	+	++++-+---+-+---+++-+--+++	0.0028	0.0049
1445662	rs2745935	a	g	93673	-0.394	0.6935	-	?-++++-+--+--+-+-+++-+-??	-0.0147	0.0193
1445663	rs2745945	t	c	95054	-0.389	0.6975	-	+---+--++-+++-+?+-+--+-+?	-0.0144	0.0162
1445664	rs2745948	t	c	99853	-1.38	0.1675	-	+-+--++-+--++-+----+-+---	-0.007	0.0055
1445665	rs2745952	t	c	36612	1.213	0.225	+	+??+??????-??+?+????-+??+	0.0099	0.0098
1445666	rs2745954	a	g	99900	-1.106	0.2686	-	+++--++++--++++----------	-0.0039	0.0052
1445667	rs2745955	a	g	99900	-0.975	0.3296	-	+++--++++--++++----------	-0.0028	0.0054
1445668	rs2745959	t	c	99900	0.785	0.4323	+	---++----++----+-++++++++	0.0024	0.0054
1445669	rs274596	a	g	10255	-0.414	0.6789	-	?????????????+??????--???	-0.0236	0.0365
1445670	rs2745960	a	t	99900	-1.37	0.1707	-	--+-+-+-+--++++-+---+----	-0.0049	0.0049
1445671	rs2745964	a	g	99897	-1.691	0.09091	-	+-+--++-+--++-+----+-+---	-0.0084	0.0056
1445672	rs2745965	t	g	10193	-0.177	0.8597	-	?????????????+??????--???	-0.0044	0.0166
1445673	rs2745967	a	g	99882	0.933	0.3508	+	-+-++----++------++++++++	0.004	0.005
1445674	rs2745972	t	c	99865	-1.216	0.2238	-	++---++-+-+++-------++---	-0.004	0.0049
1445675	rs2745975	a	g	99870	2.409	0.016	+	-++++--+-+-+-+++++++-++++	0.0108	0.005
1445676	rs2745976	t	c	20469	-1.407	0.1593	-	?????????????-???????????	-0.0428	0.0303
1445677	rs2745980	t	g	99861	2.429	0.01515	+	-++++--+-+-+-+++++++-++++	0.0109	0.005
1445678	rs2745981	t	c	99869	-1.669	0.09513	-	+----++-+-+-+-+-+---++---	-0.0071	0.005
1445679	rs274599	a	g	95716	0.688	0.4916	+	++-++-++++++-+---+?+++-+-	0.0059	0.0105
1445680	rs27460	a	g	96908	-0.809	0.4185	-	-+--+-++-----+------++-?-	-0.0019	0.0056
1445681	rs274602	a	g	99900	-0.119	0.9056	-	-++-+++----+++-+-+-+--+--	0.001	0.005
1445682	rs2746023	c	g	97659	-0.664	0.5065	-	-----+-+--+--+-+++-+-+-+?	-0.0027	0.0054
1445683	rs2746025	a	c	98409	1.06	0.2893	+	+++++-+-++-+--+---+-+--+-	0.0043	0.0053
1445684	rs2746027	a	g	98350	0.714	0.4752	+	+++++-+-++-+--+---+----+-	0.0023	0.0052
1445685	rs2746028	t	g	98409	-2.193	0.02829	-	-------++---+---+--+-++-+	-0.0106	0.005
1445686	rs2746029	c	g	98384	2.175	0.02965	+	+++++++--+++-+++-++-+--+-	0.0106	0.005
1445687	rs2746036	t	c	99900	0.181	0.8562	+	---++-++--++--+++--+---++	0.0044	0.0069
1445688	rs2746037	a	g	99900	0.324	0.7463	+	--+-+-+---++-+++++--+--++	0.0045	0.0082
1445689	rs274604	a	g	99900	-0.314	0.7532	-	+--+----+++---+-+-+-++-++	-0.0033	0.0049
1445690	rs2746042	t	c	75678	1.913	0.05581	+	+++?++++???---??-+?-??+++	0.0323	0.0246
1445691	rs2746043	a	g	42182	0.044	0.9647	+	--??+?-?+-?+????????-++??	-0.0092	0.0329
1445692	rs2746044	a	g	9993	-0.398	0.6907	-	-?????????????-+????-+???	-0.0308	0.0702
1445693	rs2746050	t	g	99900	-2.4	0.01641	-	---++-----+-+-+++-+-----+	-0.0115	0.005
1445694	rs274606	a	g	99875	0.111	0.9115	+	-++-+++----+++-+-+-+--+--	0.0018	0.0049
1445695	rs2746064	t	c	67138	-0.319	0.7498	-	+-??-+?????+?-+-+-?-????+	-0.0078	0.0193
1445696	rs2746068	t	c	96907	0.336	0.7367	+	--+++----+-+---+--+-++-?+	7e-04	0.0054
1445697	rs274607	a	g	99900	-0.07	0.9446	-	+--+---++++---+-+-+-++-++	-0.0016	0.0049
1445698	rs2746073	a	t	36612	1.187	0.2352	+	-??+??????-??+?-????-+??+	0.0146	0.01
1445699	rs2746074	a	c	43656	2.156	0.03105	+	++-++++++++?+?????+?+-+??	0.0679	0.0265
1445700	rs2746081	a	g	99900	0.596	0.5512	+	+--+---+++-+++-+--+--++--	0.0011	0.0049
1445701	rs2746083	a	c	99900	-0.386	0.6994	-	-+--+----+--++-++-+---+-+	-0.0032	0.0073
1445702	rs2746085	c	g	96908	-0.599	0.5491	-	+-+--+--+-+----+-++++-+?+	-0.0044	0.0051
1445703	rs2746086	t	g	98409	-1.069	0.2852	-	--++-++-+--+--+--++++----	-0.0061	0.0063
1445704	rs2746087	a	c	2056	-0.701	0.4834	-	????????????????????-+???	-0.0902	0.1487
1445705	rs2746097	a	g	98409	2.074	0.03806	+	++--+-++++++++-++++-+++++	0.0116	0.006
1445706	rs27461	a	c	99900	1.742	0.08159	+	++++++-++-++---++--+-++-+	0.0079	0.005
1445707	rs2746100	t	g	10254	-0.206	0.8369	-	?????????????+??????+-???	-0.0045	0.0208
1445708	rs2746102	a	g	96908	-0.815	0.415	-	--++-++-+-++-----+++---?-	-0.0048	0.0064
1445709	rs2746103	t	g	96908	1.899	0.05757	+	++-++--+++-+++-++++-+++?+	0.0108	0.006
1445710	rs2746105	a	g	98409	-2.382	0.01723	-	--+--++---++--+----+-----	-0.0126	0.0058
1445711	rs274611	a	g	99900	0.837	0.4026	+	++++--+++---++--++-+++++-	0.005	0.0051
1445712	rs2746125	a	g	96908	-0.487	0.6264	-	-+--+++--+-++--++---+--?+	6e-04	0.005
1445713	rs2746126	t	g	99900	1.476	0.14	+	+-+++-+++--++++---++-+-+-	0.0062	0.005
1445714	rs2746127	a	g	96908	-0.602	0.5472	-	-+--+++--+-++--++---+--?+	0	0.005
1445715	rs2746128	t	c	36563	0.412	0.6801	+	-??+??????-??+?+????--??-	0.0066	0.011
1445716	rs2746132	t	c	99900	-1.455	0.1458	-	-+---++--+-++--++---+-+--	-0.0039	0.005
1445717	rs2746133	t	c	99900	0.058	0.954	+	---++-+--+-+++-++--------	0.0041	0.0058
1445718	rs2746136	c	g	99900	-0.826	0.4089	-	-----++----++--++---+-+-+	-7e-04	0.0056
1445719	rs2746138	t	c	96781	0.574	0.566	+	++++---++++--+-?-++--+-+-	-0.0012	0.0072
1445720	rs274614	a	g	99900	-1.415	0.1571	-	----++---+++--++--+-----+	-0.0073	0.005
1445721	rs2746141	c	g	99895	0.524	0.6003	+	+-++---++-+--++---++-+-+-	2e-04	0.0049
1445722	rs2746147	a	g	7807	-0.018	0.9858	-	?????????????-???????????	-3e-04	0.0179
1445723	rs2746148	t	c	96031	-0.859	0.3903	-	++-+--------+++?-++-----?	-0.0079	0.0091
1445724	rs2746149	t	c	97521	2.522	0.01168	+	+++-++-+--++?+++--++-+-+?	0.0175	0.0084
1445725	rs2746150	t	c	96158	-2.915	0.003553	-	---+--+-+-------++-++-+??	-0.0207	0.0084
1445726	rs2746151	a	g	99900	-0.095	0.9241	-	++++--+-++--+----+++-+-++	3e-04	0.0098
1445727	rs2746152	t	c	99900	-1.745	0.08093	-	----+++-+-+-+-+-+---++--+	-0.0078	0.0061
1445728	rs2746153	t	c	7807	-0.651	0.5149	-	?????????????-???????????	-0.0236	0.0361
1445729	rs2746159	a	g	11650	-0.544	0.5861	-	??????????+??-??????--???	-0.0139	0.0251
1445730	rs2746164	a	g	99900	1.787	0.0739	+	++++---+-+-+-+-+-+++--++-	0.0083	0.0062
1445731	rs2746167	t	c	99900	-1.789	0.07356	-	----+++-+-+-+-+-+---++--+	-0.0082	0.0062
1445732	rs2746170	a	c	36612	2.359	0.01835	+	+??+??????-??+?+????++??-	0.0246	0.0108
1445733	rs2746179	a	c	99900	2.623	0.008719	+	-+++---++-++++-+--+------	0.0143	0.0055
1445734	rs274618	a	t	9333	0.352	0.7251	+	?????????????+??????-+???	0.0059	0.0167
1445735	rs2746181	t	g	94315	-0.568	0.5701	-	---+++--++?+--++--?---+--	-0.0071	0.0132
1445736	rs2746182	t	c	99780	0.203	0.8395	+	---+++--++++-+--++-+--++-	-0.0022	0.0076
1445737	rs2746183	a	c	73280	0.287	0.7742	+	-+??+-?????-?+-+--?++-+++	0.0029	0.0094
1445738	rs2746187	a	g	99900	-1.422	0.1549	-	--++----+---+----+-+++--+	-0.0086	0.0061
1445739	rs2746191	a	t	96908	0.251	0.8015	+	+-+++--+-+------+++-+-+?-	5e-04	0.0049
1445740	rs2746197	t	g	99900	0.757	0.4489	+	++++--+-+--+-+-+---+-+-++	0.0036	0.0052
1445741	rs2746199	t	c	99900	1.09	0.2756	+	++++++-++++--+--+-+--+-++	0.0037	0.005
1445742	rs274620	c	g	36612	-0.45	0.6524	-	+??-??????+??-?+????--??+	-0.0051	0.0093
1445743	rs2746200	t	c	99900	0.827	0.4083	+	+++++---++---+-+--++-+-++	0.0026	0.0049
1445744	rs2746203	t	c	7807	-0.47	0.6386	-	?????????????-???????????	-0.0235	0.0498
1445745	rs2746207	t	g	99900	-0.536	0.5921	-	----++++--+++-+--+-++-+--	-0.0017	0.0049
1445746	rs2746209	t	g	99900	0.551	0.5818	+	++-----++++--+-+--++--++-	0.0018	0.0057
1445747	rs274621	a	g	96844	-1.038	0.2991	-	+---++---+++--++--+----?+	-0.0061	0.0051
1445748	rs2746210	c	g	99900	-0.763	0.4453	-	----++++--+++-+--+--+-+--	-0.0027	0.0049
1445749	rs2746212	a	t	99900	-0.83	0.4065	-	+---++++--+++-+--+--+-+--	-0.0032	0.0049
1445750	rs2746214	a	g	22163	1.371	0.1702	+	????????+????+????+-?????	0.0786	0.0551
1445751	rs2746217	a	g	94091	-1.178	0.2386	-	--+++--++-+-+-??---++---?	-0.0068	0.0067
1445752	rs274622	t	c	36612	-0.455	0.6488	-	+??-??????+??-?+????--??+	-0.0052	0.0093
1445753	rs2746220	t	c	96908	-1.913	0.0557	-	++--++--------------+++?+	-0.0126	0.0055
1445754	rs2746221	t	c	96908	2.073	0.03814	+	--++--++++++++++++++---?-	0.0128	0.0055
1445755	rs2746222	a	c	96908	2.086	0.03697	+	--++--++++++++++++++---?-	0.0128	0.0055
1445756	rs2746225	a	g	99900	-1.108	0.2677	-	+--+--+-+++-+--+--+++--++	-0.006	0.0056
1445757	rs2746227	a	c	99900	-1.143	0.253	-	+--+--+-+++-+--+--+++--++	-0.0062	0.0056
1445758	rs2746228	t	c	99900	-1.22	0.2223	-	---+--+-+++-+--+-+-----+-	-0.0057	0.0052
1445759	rs2746229	c	g	99900	-1.015	0.31	-	---+++--+-----+-+-++++++-	-0.0105	0.0086
1445760	rs2746239	t	c	99886	-1.442	0.1494	-	-+++++--+--+---------++++	-0.0094	0.0057
1445761	rs2746242	a	c	91634	0.379	0.705	+	-+--++--+-+--++?+-++-+---	0.0038	0.0182
1445762	rs2746251	t	c	98405	-0.274	0.7845	-	-----+--+-+-++--+++++++-+	-0.0027	0.009
1445763	rs274628	a	c	99900	0.964	0.3348	+	-+++--+++---++--++-+++++-	0.0056	0.0051
1445764	rs274629	a	t	10245	-0.224	0.8226	-	?????????????+??????--???	-0.0038	0.0158
1445765	rs2746303	t	c	95716	0.704	0.4814	+	------+---++++-+++?--++++	0.0042	0.0062
1445766	rs2746304	t	c	99900	2.421	0.01547	+	-++++++-++-+++++-++-++-++	0.0121	0.0049
1445767	rs274631	a	g	99900	0.991	0.3216	+	-+++--+++---++--++-+++++-	0.0057	0.0051
1445768	rs2746310	c	g	95716	1.388	0.1651	+	-++-+-+++-++--+--+?+++-+-	0.0173	0.0119
1445769	rs2746311	t	c	95668	-1.323	0.186	-	---+-+-+-+--+--++-?--++-+	-0.0146	0.01
1445770	rs2746313	t	c	99898	1.833	0.06682	+	+++-+++++++++-++-+++++-++	0.0109	0.0065
1445771	rs2746314	t	c	95713	0.692	0.4892	+	++---++----+++++-+?--+--+	0.0053	0.0066
1445772	rs2746317	t	c	99900	0.552	0.581	+	++---++----+++++-++--+--+	0.0042	0.0064
1445773	rs2746318	t	g	95716	0.875	0.3816	+	+++-+-+-+-++-++--+?-+--+-	0.0108	0.0102
1445774	rs2746319	a	g	87839	-0.589	0.5556	-	-?-+-+-+-+--+--++-?--++--	-0.0095	0.0106
1445775	rs2746320	a	g	99900	0.847	0.397	+	---+-+--+---+++++----++++	0.0019	0.0055
1445776	rs2746321	a	t	99900	0.951	0.3416	+	-+-+-+--+--++++++--+-++++	0.0024	0.0051
1445777	rs2746322	t	g	56071	1.483	0.138	+	?+++-++-++-?-+??-????+-+-	0.0334	0.022
1445778	rs2746323	a	t	32810	-1.509	0.1314	-	?--??--+-++?-???++??+-?++	-0.021	0.012
1445779	rs2746324	c	g	96781	-0.353	0.724	-	+---+--+--+--++?+++++-+++	-0.0052	0.0065
1445780	rs2746325	t	c	99857	-1.605	0.1084	-	-+--+-++-++-+-+---+++----	-0.0068	0.0056
1445781	rs2746339	a	g	99159	-0.951	0.3414	-	-+--++-+++-------+++---+-	-0.0055	0.0049
1445782	rs274634	a	c	67895	0.642	0.5207	+	+++-++---+-?+-??+-?++++++	0.0012	0.015
1445783	rs2746342	t	g	99900	-0.586	0.5579	-	-+--++--+-++-++--++----++	-0.0022	0.0051
1445784	rs2746347	t	c	99855	0.952	0.3409	+	--+-+++---+++++-++--+-+-+	0.0102	0.0076
1445785	rs2746348	t	c	36612	1.481	0.1385	+	+??+??????+??+?+????++??+	0.0119	0.0087
1445786	rs2746349	t	c	96054	1.097	0.2726	+	+-++--++--+++++++-+-+++?+	0.0057	0.005
1445787	rs2746355	a	t	99900	0.456	0.6487	+	--+-+++-+-+++++-++--+-+--	0.0063	0.0074
1445788	rs274637	t	c	96901	-0.742	0.4581	-	----++---+++--++--+----?+	-0.0041	0.0051
1445789	rs274638	t	g	99900	0.574	0.566	+	-+-+---++-+-+++-++--+++--	0.0023	0.0053
1445790	rs2746389	a	g	7807	-0.803	0.4222	-	?????????????-???????????	-0.0198	0.0246
1445791	rs274639	a	g	99900	-0.547	0.5842	-	+-+-+++--+-+---+--++---++	-0.0021	0.0054
1445792	rs274640	a	g	99900	-0.43	0.6669	-	----+++-++-++-----++----+	-0.0013	0.005
1445793	rs274641	a	g	94841	-0.336	0.7368	-	--++++---++--+??--+------	-0.0027	0.0127
1445794	rs2746418	a	g	99900	-0.667	0.5048	-	---+-+----+-++++--+---+++	-0.0045	0.0051
1445795	rs2746419	a	c	10209	-0.428	0.6688	-	?????????????+??????--???	-0.0073	0.016
1445796	rs274642	a	g	99900	0.632	0.5277	+	-+-+---++-+-++++++--+++--	0.0029	0.0052
1445797	rs2746426	t	c	7807	0.348	0.7277	+	?????????????+???????????	0.0065	0.0187
1445798	rs2746429	t	c	99900	2.404	0.0162	+	-+--+--+-+-++++-++-++++++	0.011	0.005
1445799	rs274643	t	c	99895	0.113	0.9102	+	+-+-++-+--+--+++-+--++-++	-3e-04	0.0049
1445800	rs2746432	t	c	99900	2.344	0.01909	+	-+--+--+-+-++++-++-++++++	0.0108	0.005
1445801	rs2746439	t	c	99791	-0.613	0.5402	-	+----+-+-++-+-+++++-+----	-0.0034	0.005
1445802	rs2746440	a	g	36612	2.433	0.01497	+	+??+??????+??+?+????+-??+	0.0284	0.0118
1445803	rs2746441	a	g	99900	0.386	0.6998	+	+-----+-+--+-+-++-+-+--+-	0.0014	0.0099
1445804	rs2746444	t	c	99900	0.828	0.4079	+	-+---++---+++----+++--++-	0.0095	0.0096
1445805	rs274645	a	g	99898	-0.044	0.9653	-	-+---+++-++++-----+++++++	2e-04	0.0071
1445806	rs274646	a	g	99900	0.457	0.648	+	-++----++----+-++++-+++--	0.0018	0.006
1445807	rs2746460	a	t	96144	-0.725	0.4685	-	-+-+--++--+-+--+--++-+-??	-0.0052	0.0152
1445808	rs2746461	a	g	99150	0.777	0.4374	+	++++-+-+-+-+-++-++-++-+-?	0.0088	0.0093
1445809	rs2746463	c	g	99150	0.742	0.4579	+	++++-+-+-+-+-++-++-++-+-?	0.0084	0.0091
1445810	rs2746466	t	c	99150	-0.841	0.4006	-	-+-+--++--+-+--+--++-+--?	-0.0063	0.0151
1445811	rs2746467	a	g	99150	0.402	0.688	+	-+-+-------++++--+-+++-+?	0.0035	0.0089
1445812	rs2746469	t	c	99150	-0.702	0.4829	-	-+-+--++--+-+--+--++-+--?	-0.0045	0.0151
1445813	rs274647	t	g	99900	0.466	0.6412	+	+++-+++-+-+--+++--++---+-	0.0018	0.0052
1445814	rs2746472	t	c	34132	-0.676	0.4988	-	?--??--??????+???????????	-0.003	0.0191
1445815	rs2746479	a	g	99898	-0.927	0.3541	-	-++-+---+--+-++-++-+---+-	-0.0053	0.0069
1445816	rs2746486	a	g	96143	1.284	0.1991	+	+-+--++-+++++--+--++++-??	0.0069	0.0051
1445817	rs2746495	a	g	92034	-0.594	0.5524	-	---+-++++-+-+-??--+-+?+-?	9e-04	0.0223
1445818	rs2746502	a	g	91375	-0.501	0.6164	-	+----+++--+-?--?--++++-??	-0.0041	0.0118
1445819	rs2746505	t	c	96023	0.528	0.5975	+	-++++---++-++++?++----+-?	0.0044	0.0115
1445820	rs274651	t	g	99900	-0.507	0.6121	-	-+-+---+-+-++---++--+++-+	-0.0021	0.0052
1445821	rs2746515	t	g	99787	-0.154	0.8779	-	--+--++++-+--+-+--+-++---	8e-04	0.0051
1445822	rs2746524	t	c	96031	-1.221	0.2222	-	---+--++--+-+--?--++-+--?	-0.0111	0.0154
1445823	rs2746530	a	g	24451	-1.149	0.2507	-	????????+?--?????????????	-0.0677	0.0579
1445824	rs2746533	a	g	35862	-0.325	0.7449	-	-??-??????+??+?+????-+???	-0.0045	0.0167
1445825	rs2746535	a	g	99131	0.743	0.4574	+	++++-+-+-+-+-++-++-++-+-?	0.0073	0.0093
1445826	rs2746536	t	c	99150	0.67	0.5028	+	++++-+-+---+--+-++-++-+-?	0.0071	0.0091
1445827	rs2746542	a	c	99076	0.968	0.3328	+	+++-++--++-+-++-++--+-++?	0.0092	0.0151
1445828	rs2746543	a	g	99882	-0.153	0.878	-	++--++-----+-----+-+-+-++	-0.0017	0.0053
1445829	rs2746546	t	g	99900	-0.363	0.7168	-	++---+-+-+++--+-+---+++--	-0.0043	0.0064
1445830	rs2746548	a	g	99900	0.247	0.805	+	---+---+--++++++-----+++-	7e-04	0.005
1445831	rs2746551	a	g	99900	-0.178	0.8586	-	+++-+++-++------+++++---+	-4e-04	0.005
1445832	rs2746553	t	c	96908	-0.053	0.9577	-	--+++------+------+++++?-	-1e-04	0.0049
1445833	rs2746561	a	g	99900	-0.583	0.5602	-	-+---------+++---++--++-+	-0.0035	0.0064
1445834	rs274657	a	c	99900	0.103	0.9183	+	+-+++--+---+-++++---+----	0.0017	0.008
1445835	rs2746575	t	c	46033	1.092	0.2749	+	?-+??+?++-+?--??-??+?+++-	0.0415	0.0389
1445836	rs2746576	t	c	46033	1.093	0.2743	+	?-+??+?++-+?--??-??+?+++-	0.0407	0.0384
1445837	rs2746577	a	c	46033	1.085	0.2781	+	?-+??+?++-+?--??-??+?+++-	0.0404	0.0384
1445838	rs2746579	a	g	50447	-0.821	0.4114	-	?+-??-?--+-?++??+??-?---+	-0.0289	0.0362
1445839	rs274658	a	t	99900	1.23	0.2188	+	+-+-+---+-++-++++-+---++-	0.0043	0.0054
1445840	rs2746580	a	c	45312	-1.05	0.2935	-	?+-??-?--+-?+-??+??-?---+	-0.0385	0.0378
1445841	rs2746581	t	c	80338	0.357	0.7211	+	---?+++?-+-+++--++?+---?+	0.008	0.0104
1445842	rs2746583	t	c	39756	-0.945	0.3444	-	?+-?---++-??---?+---??-+?	-0.0155	0.0102
1445843	rs2746584	t	g	82980	-0.5	0.6173	-	++++?++-++?---??--?-?-++?	-0.0148	0.0221
1445844	rs274659	c	g	99900	1.134	0.2569	+	+++-+--++-+--++++-+----+-	0.0046	0.0056
1445845	rs2746591	t	c	91802	-1.172	0.241	-	---+--+-++-+--??++---+-?+	-0.0163	0.0193
1445846	rs2746592	t	c	91849	-1.409	0.159	-	---+-----+-+--??++---+-?+	-0.025	0.019
1445847	rs27466	a	g	94423	-1.055	0.2914	-	?++++-+-----+--+-++--+-?+	-0.0064	0.0065
1445848	rs2746600	a	g	99900	-0.095	0.9241	-	---+-++++--+----++++++--+	-5e-04	0.0055
1445849	rs2746602	t	g	99900	0.51	0.6104	+	+-+-+-----++-++-++--++-++	0	0.0051
1445850	rs2746603	t	c	98409	-1.215	0.2243	-	+--++-+-+------+-+--+--+-	-0.0113	0.0097
1445851	rs2746607	t	g	98409	0.614	0.5393	+	-+-++-+-----++-+++++-+---	0.0036	0.006
1445852	rs2746608	t	c	98409	0.289	0.7726	+	++-++-+-----++-+-+++-++--	0.0013	0.0068
1445853	rs2746609	t	c	98409	-0.779	0.4362	-	+-+--+-+++++--+-----+--++	-0.0054	0.006
1445854	rs274661	t	c	99900	-1.475	0.1402	-	-+-+-++--+--+----++++++--	-0.0059	0.0052
1445855	rs2746617	c	g	98306	0.41	0.6819	+	---+----+-++++---+-++--++	0.0024	0.005
1445856	rs2746618	t	g	36612	-0.444	0.6571	-	-??-??????-??+?-????--??-	-0.0049	0.0116
1445857	rs2746619	a	g	98339	-0.809	0.4182	-	---+--+-+---+------+++--+	-0.0021	0.0052
1445858	rs2746620	t	c	98409	1.645	0.1	+	+--+---+-+++++-++-+++-+-+	0.0097	0.0097
1445859	rs2746621	a	g	7807	-1.473	0.1407	-	?????????????-???????????	-0.0769	0.052
1445860	rs2746626	c	g	7807	0.398	0.6905	+	?????????????+???????????	0.0118	0.0295
1445861	rs2746628	t	c	99900	0.542	0.5876	+	+-+++--+--+--+-+---+-+-+-	0.0019	0.0062
1445862	rs2746629	c	g	95716	-0.458	0.6468	-	-+---++-++-++-+-++?-+-+--	-0.0011	0.0063
1445863	rs274663	a	g	89252	-1.371	0.1703	-	-+?---++-++-+-??+-?-+---+	-0.0162	0.0161
1445864	rs2746633	a	g	1505	0.025	0.9803	+	????????????????????+-???	0.0012	0.0484
1445865	rs274664	a	c	89252	1.633	0.1025	+	+-?+++--+--+-+??-+?+-+++-	0.0207	0.016
1445866	rs2746647	t	c	99900	-1.512	0.1305	-	------+-+---+--+-+-+--+++	-0.0097	0.0069
1445867	rs2746649	a	t	99900	-1.54	0.1236	-	+---+-+-+---+--+-+-+--+++	-0.0098	0.007
1445868	rs2746654	c	g	99900	-0.71	0.4776	-	+----+----+-+--+-+-++-+-+	-0.0044	0.0049
1445869	rs2746655	t	c	9747	1.316	0.1883	+	?????????????++??????????	0.0387	0.0249
1445870	rs2746657	a	g	72800	-1.26	0.2078	-	+--+----+-+?+-??-+-+-+---	-0.0163	0.0115
1445871	rs274666	a	g	89093	1.587	0.1125	+	+-?+++--+--+-+??-+?+-+++-	0.0201	0.0162
1445872	rs2746663	a	g	96816	1.665	0.09595	+	++++-+-+-+++-++-+-+--+-?-	0.0102	0.0069
1445873	rs274667	a	g	96906	-1.402	0.1608	-	-+-+-++--+--+----++++++?+	-0.0058	0.0051
1445874	rs2746678	t	c	99884	0.289	0.7728	+	---+--+-+-++-+++++--+++--	0.0039	0.0062
1445875	rs2746683	a	c	96850	0.371	0.7107	+	-+-+-+-+----+++----+-++?-	0.0052	0.0088
1445876	rs2746685	a	g	99894	0.421	0.6738	+	-+-+-+-+--+-+-+-+--+-++--	0.0049	0.0084
1445877	rs2746689	t	c	10244	-0.482	0.63	-	?????????????-??????-+???	-0.009	0.019
1445878	rs27467	a	g	97415	-0.321	0.7485	-	?++++-+-+---+--+-+-+---+-	-0.0014	0.008
1445879	rs274671	t	g	99900	1.093	0.2742	+	+-+-+---++++--+++------++	0.0036	0.005
1445880	rs274672	a	g	99900	-1.006	0.3143	-	-+-+-+-+-++--+---++++++--	-0.0033	0.005
1445881	rs274674	t	c	99900	-1.222	0.2215	-	-+-+-++--+--++---++++++-+	-0.0041	0.0052
1445882	rs274676	t	c	99900	1.101	0.271	+	+++-++--+-++---++-++--++-	0.0034	0.0051
1445883	rs274678	a	g	99871	-1.483	0.1382	-	---+-++--+--+----++++++-+	-0.0058	0.0051
1445884	rs274679	a	c	99900	1.038	0.2991	+	+++-++--+-++---++-++--+++	0.003	0.0051
1445885	rs27468	t	g	34127	-0.262	0.7932	-	???-??????+??+?-????++??+	-0.0043	0.0145
1445886	rs274680	t	g	99900	1.071	0.2842	+	+++-++--+-++---++-++--+++	0.003	0.0051
1445887	rs274681	t	c	36612	-0.11	0.9123	-	+??-??????+??-?+????--??+	-0.0051	0.0096
1445888	rs274682	a	g	99782	0.9	0.368	+	+++-++--+-++--+++-++--+++	0.0021	0.0053
1445889	rs274683	a	t	99900	-1.212	0.2256	-	-+-+-++--++------+++-++--	-0.0039	0.0051
1445890	rs274684	c	g	96781	1.265	0.2058	+	+-+-+--+++-+-++?+-----+++	0.0057	0.0074
1445891	rs274685	a	g	95716	-0.521	0.6026	-	++---++---+-----+-?+--+++	-0.002	0.0053
1445892	rs2746875	a	g	5853	-0.353	0.7238	-	??-???-????????????????+?	-0.0051	0.0184
1445893	rs274689	c	g	99900	-1.377	0.1685	-	---+-+---+--+++--++++++--	-0.0054	0.005
1445894	rs2746899	t	c	4476	-0.15	0.881	-	??+???-?????-????????????	-0.004	0.016
1445895	rs27469	t	c	97415	-0.248	0.8037	-	?++++-+-+---+--+-+-+---+-	-8e-04	0.008
1445896	rs274692	t	c	99900	-1.335	0.182	-	---+-+---+--+++--++++++-+	-0.0051	0.005
1445897	rs2746967	a	c	98395	1.683	0.09239	+	+-++++-+-+++-++++++0-+--+	0.0055	0.0053
1445898	rs2746969	a	t	97001	0.321	0.7484	+	-+?+---+-+-++++-----+++++	0.0015	0.0158
1445899	rs274697	a	c	99900	1.443	0.149	+	+++-+-+-+-++---++-+----+-	0.005	0.0049
1445900	rs2746971	t	c	98406	0.646	0.5185	+	++--++-+++-++--+---+--+-+	0.0019	0.005
1445901	rs274699	a	c	99900	1.194	0.2323	+	+++-++--+-++---++-++--+++	0.0038	0.0051
1445902	rs2746996	t	c	99900	-0.843	0.3992	-	++--++--++--+----++-+++-+	-0.0079	0.0071
1445903	rs2746997	a	g	99900	-0.022	0.9824	-	---+-+-++---++-++-++--++-	-0.001	0.005
1445904	rs2746998	a	g	99900	-0.219	0.8263	-	+++-+-+--+++--+--+--++--+	-5e-04	0.005
1445905	rs274700	a	g	99900	1.301	0.1934	+	+-+-++-+-+-+-+++++----+--	0.0066	0.0072
1445906	rs2747002	a	g	99900	1.507	0.1318	+	+++--++-+--+++++-+-+----+	0.0115	0.0064
1445907	rs2747005	a	g	99900	-0.508	0.6117	-	+-+-+-+--++---+-+-+-++++-	-0.0024	0.0049
1445908	rs2747008	a	g	99865	-1.459	0.1446	-	---++--+-++-----+-+-++++-	-0.0112	0.0064
1445909	rs2747009	a	g	99900	-1.98	0.04771	-	---+++-+-++-----+-+--++++	-0.0156	0.0068
1445910	rs274701	a	c	99900	-1.63	0.1031	-	---+-+-+-+--+++--+-++++-+	-0.0059	0.005
1445911	rs2747010	a	g	99900	-0.689	0.491	-	-+---+----+--+++-++-++-+-	-0.005	0.0065
1445912	rs2747036	a	t	99900	0.3	0.7641	+	+-+-+-++-+-----+---+----+	0.0029	0.005
1445913	rs2747038	t	c	99900	0.067	0.9467	+	+-+-+-++-+---+-+---+-----	0.0018	0.0049
1445914	rs2747039	t	c	99900	0.488	0.6256	+	------++-+++-+-+--++-+++-	0.0028	0.0052
1445915	rs2747042	t	c	99900	0.05	0.9602	+	-+-+-+--+-+++++-+++-+++++	-0.0012	0.0049
1445916	rs2747045	a	t	99900	-0.407	0.6838	-	++++++--+---+++-++--+----	-0.002	0.0052
1445917	rs2747047	t	c	99875	0.04	0.9679	+	-+-+-+--+-+++++-+++-+++++	-0.0013	0.0049
1445918	rs274705	t	c	96781	-0.756	0.4499	-	++-+-++-+++-+--?-++++++++	-0.0063	0.0085
1445919	rs2747058	t	c	99897	-1.049	0.2942	-	-----++---+---+++++-++--+	-0.0052	0.006
1445920	rs274706	t	c	99900	1.185	0.2362	+	+++-++--+-++---++-++--+++	0.0038	0.0051
1445921	rs2747063	t	c	99900	-0.23	0.8181	-	++---+--+-----++-++---+-+	-0.0016	0.0051
1445922	rs2747075	a	g	99900	0.88	0.3788	+	++-+--++--+-+++-+-+-+++++	0.0075	0.0062
1445923	rs2747076	t	c	99900	-1.172	0.241	-	+-------+--++-++--++--+--	-0.0074	0.0058
1445924	rs2747089	t	c	3071	-1.122	0.2621	-	??????-?????-????????????	-0.1518	0.1053
1445925	rs274709	t	c	99900	1.171	0.2417	+	+++-++--+-++---++-++--+++	0.0037	0.0051
1445926	rs2747095	a	g	99900	0.608	0.5434	+	+++--++-++---+++-+--+-+++	0.0035	0.0054
1445927	rs2747097	a	g	99679	-0.619	0.536	-	++---++-++---+--+-+-+-+-+	-8e-04	0.0053
1445928	rs2747099	t	c	99900	0.821	0.4114	+	+---+-----+++-++-+++++++-	0.0012	0.0055
1445929	rs2747100	c	g	99900	-0.995	0.3195	-	+-+++-+---+-+---+-++-+--+	-0.0056	0.0051
1445930	rs2747101	c	g	99900	1.236	0.2164	+	-++--+-++++-++++----++++-	0.0075	0.0051
1445931	rs2747103	a	g	99900	-0.112	0.9111	-	+--+++----++----+-++----+	-0.0018	0.0058
1445932	rs2747104	a	g	99900	0.092	0.9267	+	+--+++----+++---++++----+	-4e-04	0.0056
1445933	rs2747105	a	g	99863	0.498	0.6188	+	-++----++++-++++-+--++++-	0.0041	0.0051
1445934	rs2747106	c	g	36612	-0.247	0.8049	-	-??-??????+??+?+????++??-	8e-04	0.0093
1445935	rs2747114	a	g	99900	-0.535	0.5928	-	--++-+---+++-+++----+----	-0.003	0.0049
1445936	rs274712	a	g	99900	-1.283	0.1996	-	---+-+---++-+++--++++++-+	-0.0051	0.005
1445937	rs2747121	t	c	26157	-2.146	0.03186	-	-?+----???-?-??????-??--?	-0.1091	0.0563
1445938	rs274713	t	g	99865	1.17	0.2422	+	+++-++--+-++---++-++--+++	0.0037	0.0051
1445939	rs274714	t	c	99823	-0.178	0.8588	-	++----+-++-++---+++-++-++	-1e-04	0.005
1445940	rs2747140	t	c	99900	-2.342	0.01919	-	+-+--+-++---+-+-++---+--+	-0.0115	0.005
1445941	rs2747146	c	g	99900	-2.094	0.03625	-	--++---++---+-+-++---+--+	-0.0107	0.005
1445942	rs2747147	a	t	99900	-2.429	0.01516	-	+---+---++--+-+--+--++--+	-0.0175	0.0069
1445943	rs2747148	t	c	99889	-2.414	0.0158	-	+---+---++--+-+--+--++--+	-0.0174	0.0069
1445944	rs274715	a	g	99849	1.193	0.233	+	+++-++--+-++---++-++--+++	0.0039	0.0051
1445945	rs2747151	a	g	99900	0.144	0.8852	+	++---++++++--+----+++---+	-9e-04	0.0082
1445946	rs2747155	a	c	99900	2.417	0.01565	+	-+++-+++--++-+-++-++--++-	0.0175	0.0069
1445947	rs2747156	t	g	96721	2.16	0.03076	+	++--+-++-+++-+++--+---+?-	0.0117	0.0051
1445948	rs2747157	c	g	99900	2.215	0.02679	+	-+++-+++--++-+-+--++--++-	0.0144	0.0062
1445949	rs2747159	c	g	99900	-2.053	0.04009	-	--+++--++---+-+-++---+--+	-0.0104	0.005
1445950	rs2747160	t	c	99898	-2.08	0.03754	-	--+++---+---+-+-++---+--+	-0.0106	0.005
1445951	rs2747161	t	c	99900	2.035	0.04184	+	++----++-+++-+-+--+++-++-	0.0105	0.005
1445952	rs2747165	a	c	7807	-1.408	0.1591	-	?????????????-???????????	-0.0411	0.029
1445953	rs2747166	a	c	99894	-2.378	0.01743	-	+---+---++--+----+-+-+--+	-0.0165	0.0066
1445954	rs2747167	c	g	10248	-1.039	0.2989	-	?????????????-??????-+???	-0.0234	0.0245
1445955	rs2747168	t	c	99900	-2.476	0.01328	-	+---+----+--+----+--++--+	-0.0171	0.0066
1445956	rs274717	a	g	99869	1.652	0.09844	+	+-+-+--++-++-++++------+-	0.0066	0.0051
1445957	rs2747170	t	c	99900	-2.983	0.002851	-	+---+----+--+----+--++--+	-0.0198	0.0065
1445958	rs2747171	a	t	99900	-2.3	0.02147	-	+---+-------+---++--++--+	-0.0146	0.006
1445959	rs2747173	t	c	99900	-2.456	0.01403	-	+---+---++--+----+--++--+	-0.0168	0.0066
1445960	rs274718	a	c	99817	-1.298	0.1941	-	---+-+---++-+++--++++++-+	-0.0051	0.005
1445961	rs2747181	a	c	10255	-0.643	0.5201	-	?????????????-??????-+???	-0.0117	0.0219
1445962	rs274719	t	c	99715	1.257	0.2086	+	+++-++--++++---++-++--+++	0.0042	0.0051
1445963	rs274720	a	g	96908	0.985	0.3244	+	+++-+-+++--+---++------?-	0.0038	0.0051
1445964	rs274721	t	c	96908	-0.992	0.321	-	---+-+---++-+++--++++++?+	-0.0038	0.0051
1445965	rs2747238	t	g	97688	-0.471	0.6379	-	+--+---+--+-+-+-++---+-+-	-0.0034	0.0055
1445966	rs274724	a	g	89245	-1.89	0.05879	-	-+?---++-++-+-??+-?-+---+	-0.0253	0.0161
1445967	rs2747265	c	g	5099	0.65	0.5158	+	?????????????+??????+-???	0.037	0.0678
1445968	rs274728	t	c	99900	-1.218	0.2231	-	+----+---+--+++++--+-+---	-0.0103	0.0087
1445969	rs274732	t	g	99900	-1.344	0.1791	-	+----+---+--+-+++--+-+---	-0.0114	0.0086
1445970	rs274735	a	g	99900	1.428	0.1533	+	-++++-+++-++-+---++-+-+++	0.0121	0.0086
1445971	rs2747351	a	g	97681	0.492	0.623	+	-++-+-+-++-+-+-+--+++-+-+	0.0033	0.0054
1445972	rs2747363	a	g	88026	1.828	0.06756	+	++?++--+++-++-+?--+-+---+	0.0299	0.0178
1445973	rs2747364	a	g	97688	-0.432	0.6656	-	+--+---+--+-+-+-++---+-+-	-0.0031	0.0054
1445974	rs2747397	a	g	83811	1.481	0.1387	+	++?--+++++-+-+??-+?+??+?-	0.0266	0.0161
1445975	rs2747398	a	t	94225	0.073	0.9416	+	+-++----++-++---++?+++--+	-0.0011	0.0052
1445976	rs2747399	a	g	94225	0.185	0.8535	+	+-++----++-++---++?+++--+	-5e-04	0.0052
1445977	rs2747400	t	g	2425	-0.677	0.4982	-	????????????????????--???	-0.021	0.0306
1445978	rs2747403	t	c	98409	-0.295	0.7678	-	--+------++++-++-+---+-++	-0.0028	0.005
1445979	rs2747405	t	c	98409	-0.565	0.5722	-	+--+-++--+++--++++-+-+--+	-0.0023	0.0061
1445980	rs274741	t	c	1940	0.669	0.5033	+	??????????????+??????????	0.0299	0.0445
1445981	rs2747419	t	g	98146	0.27	0.7869	+	++--?+-+-+-+++-+-+------+	-0.0026	0.0183
1445982	rs2747421	c	g	96908	-1.689	0.0913	-	+-+-++---++------+-+-++?+	-0.0109	0.006
1445983	rs2747430	a	g	99900	-1.173	0.2407	-	+--+++--+-+------+++----+	-0.0069	0.0052
1445984	rs2747436	t	c	95254	-1.505	0.1324	-	-+-+-+---++-?--+++++-++?+	-0.01	0.0053
1445985	rs2747437	t	g	1134	-0.917	0.3592	-	?????????????????-???????	-0.246	0.267
1445986	rs2747442	a	g	99764	-1.72	0.08541	-	-+-+-+---++----++-++-++-+	-0.0105	0.0052
1445987	rs2747444	t	g	18149	0.525	0.5994	+	?????????????+???+???????	0.021	0.0457
1445988	rs2747445	a	c	98143	0.066	0.9476	+	++--?+-+---+++-+-+------+	-0.0064	0.0185
1445989	rs2747453	t	c	99900	-1.189	0.2344	-	-+-+++------+-----++-++-+	-0.0092	0.0066
1445990	rs2747454	a	g	38552	1.014	0.3105	+	+??-??????-??++-????+-??-	0.01	0.0104
1445991	rs2747457	t	g	96908	1.786	0.07402	+	++-+-++++--++++++-+-+--?-	0.0112	0.0057
1445992	rs2747458	a	g	95154	-0.428	0.6688	-	--++?-+-+-+---+-+-+++++?-	5e-04	0.0184
1445993	rs2747476	c	g	99092	-0.738	0.4602	-	++++-----++++--++--+-+-0?	-0.0066	0.0079
1445994	rs2747477	a	g	99900	1.654	0.09818	+	+-+++++++--+--+--+-+-++--	0.0078	0.0051
1445995	rs2747479	a	c	99900	1.69	0.091	+	+-+++++++--+--+--+-+-++--	0.008	0.0051
1445996	rs2747492	a	g	99900	0.361	0.7179	+	-+----++++++--++--+---+++	0.0057	0.01
1445997	rs2747493	a	g	99900	0.058	0.9538	+	-----++++++++--+-+-+-++-+	0.0018	0.0054
1445998	rs2747496	c	g	99859	-0.104	0.917	-	++++----+----++-+-+-+--+-	-0.0017	0.0056
1445999	rs2747498	a	c	10224	-1.273	0.2031	-	?????????????-??????+-???	-0.0215	0.0171
1446000	rs27475	a	c	94423	-0.384	0.7008	-	?++-+-+-+--++--+---+-+-?-	-0.0019	0.0051
1446001	rs274750	a	c	28135	-0.397	0.6915	-	????+????????-?+???????-?	-0.0037	0.0447
1446002	rs2747500	a	g	99900	0.207	0.8362	+	----+++++++++--+---+-++-+	0.0019	0.0056
1446003	rs2747501	a	c	99900	-0.13	0.8965	-	-++--+-++---++--+-+--++-+	-8e-04	0.0051
1446004	rs2747507	t	g	99855	-0.534	0.5934	-	+--+++------++--++-+++---	-0.0074	0.0103
1446005	rs274751	t	c	22997	0.289	0.7728	+	????-????????+?-???????+?	-0.002	0.0473
1446006	rs2747519	t	g	7841	-0.055	0.956	-	?-???????????????????????	-0.006	0.1176
1446007	rs2747525	a	c	99900	0.711	0.4772	+	++++++++---+--+---+++---+	0.0038	0.0051
1446008	rs2747526	t	c	99895	-0.973	0.3305	-	--+----++++-++++-+---++-+	-0.0049	0.0056
1446009	rs2747532	a	c	98409	-1.302	0.1931	-	--+-+-++----+-++++--++-++	-0.0055	0.005
1446010	rs2747535	a	g	98409	-1.519	0.1288	-	--+-+-+-+++++---+---++--+	-0.0055	0.0051
1446011	rs2747536	c	g	98409	-1.912	0.05588	-	--+-+-+-+++++---+---++--+	-0.0077	0.005
1446012	rs2747537	a	g	98409	-1.171	0.2414	-	--+-+-+-++++----+---++--+	-0.0045	0.0049
1446013	rs2747539	t	c	98409	0.054	0.9566	+	---+-+++-+--+--+---+--+++	9e-04	0.0073
1446014	rs274754	a	g	36612	0.198	0.8431	+	+??-??????-??+?+????--??+	5e-04	0.0121
1446015	rs274755	t	c	99900	-1.51	0.131	-	-----+---+--+-+++--+-+---	-0.0129	0.0086
1446016	rs2747554	a	c	98409	1.933	0.05328	+	++-+---+-+-+--+++++++++++	0.0081	0.005
1446017	rs2747561	t	c	98409	-0.637	0.524	-	++-+---+-+-+--+-+++++-+++	-0.0043	0.0053
1446018	rs2747564	a	g	73782	1.015	0.3103	+	-?-?----+?++++-?--?+-++++	0.0051	0.0153
1446019	rs2747565	a	g	91106	2.075	0.03802	+	+++++--+++++-++?+-?---+--	0.0125	0.0074
1446020	rs2747566	t	c	98409	0.098	0.922	+	-+-+++-+-++-+-++---++-+-+	-1e-04	0.0122
1446021	rs2747568	a	g	98397	-0.038	0.9697	-	+++-+-+-+++--+--++++++---	2e-04	0.0051
1446022	rs2747569	t	c	98409	-0.849	0.396	-	-+-+-+-++--++--+-+--+-+--	-0.0045	0.0056
1446023	rs27476	a	t	97370	0.664	0.5064	+	?--+-+-+-++--++-+++-+-+++	0.0031	0.0051
1446024	rs2747640	a	g	99900	1.701	0.08893	+	+-+-+++++--+++-++-+++--++	0.0081	0.0053
1446025	rs2747642	t	c	99878	1.854	0.06381	+	+-+++++++--+++-++-++++-++	0.009	0.0053
1446026	rs2747648	t	c	31184	-0.191	0.8487	-	????--???+?+????--??????-	-0.0017	0.0274
1446027	rs2747649	c	g	99900	-0.673	0.5007	-	---+-+---++--++-++----+--	-0.0028	0.006
1446028	rs2747652	t	c	99900	-0.969	0.3327	-	--+++----++---++-+--+-+--	-0.0045	0.0051
1446029	rs2747653	t	c	99835	-1.129	0.2587	-	---+-+---++--++-++-0--+--	-0.0053	0.0061
1446030	rs2747654	a	g	38068	0.184	0.8536	+	-??+??-???+??+?-????--??-	0.0033	0.0095
1446031	rs2747655	t	c	99900	0.501	0.6165	+	--+++-++--+--+++-+--++++-	0.0039	0.006
1446032	rs2747658	c	g	99900	-1.28	0.2005	-	-+-+-----++-+-++-++---+--	-0.0066	0.0054
1446033	rs2747660	a	c	99900	-1.366	0.1719	-	-+-+-----++---++-++-+-+--	-0.0071	0.0054
1446034	rs2747662	t	c	95716	1.867	0.06185	+	+++++++++--+++--+-?+++-++	0.009	0.0053
1446035	rs2747665	t	c	10252	1.017	0.309	+	?????????????+??????++???	0.0187	0.0189
1446036	rs2747666	t	c	99900	-2.036	0.0417	-	--+----------+++-+-+-+++-	-0.0127	0.0065
1446037	rs2747667	a	t	99900	-1.719	0.08561	-	--+-+---+---+-++++-+++-++	-0.0084	0.0051
1446038	rs2747669	t	c	99872	1.684	0.09213	+	++-+-+++-+++-+----+---+-+	0.008	0.0051
1446039	rs2747670	t	c	95703	-1.597	0.1103	-	----+---+--+---+-+?+--+--	-0.0088	0.0052
1446040	rs2747671	t	c	99900	1.898	0.05774	+	++-+-+++-+++-+----+---+-+	0.0092	0.0051
1446041	rs2747675	a	c	99900	1.066	0.2866	+	++++-+++-++--++-+-+-+-+-+	0.0056	0.0052
1446042	rs2747676	t	g	99900	1.041	0.2981	+	++++-+++-++--++-+-+-+-+-+	0.0054	0.0052
1446043	rs2747677	t	c	99900	0.528	0.5973	+	++++-+++--+--++---+-+++--	0.0029	0.0051
1446044	rs2747678	a	c	99900	1.255	0.2096	+	-+-+---++-+++-++++++---++	0.0124	0.0102
1446045	rs2747679	t	c	99900	1.469	0.1418	+	-+-+-++++-++++++++++---++	0.015	0.0094
1446046	rs2747680	a	g	99900	2.316	0.02057	+	++-+++++++++---++-+-+--+-	0.0134	0.0064
1446047	rs2747682	c	g	99896	-1.046	0.2956	-	--+--------+++++-+-+-+---	-0.0045	0.0055
1446048	rs2747683	t	c	99900	-1.153	0.249	-	----+---+--++-++++-+---++	-0.0056	0.0051
1446049	rs2747684	t	c	7807	0.171	0.8639	+	?????????????+???????????	0.0034	0.0199
1446050	rs2747685	t	c	99900	-1.715	0.08643	-	----+---+--+---+-+-+--+-+	-0.0086	0.0051
1446051	rs2747686	a	g	2449	-1.365	0.1724	-	????????????????????--???	-0.0592	0.043
1446052	rs2747688	t	c	99900	-0.984	0.3251	-	+-+-++-++---+-----+0-----	-0.0064	0.0051
1446053	rs2747690	t	g	99900	0.092	0.9265	+	++++--+++---+---+----++-+	0.0019	0.0074
1446054	rs2747691	t	c	92597	1.144	0.2525	+	+-+++-+-+-+-++-?+-?--++-+	0.0091	0.0068
1446055	rs2747692	a	c	99900	-0.619	0.5357	-	-+-+++-++++---+++--+-+-+-	-0.0026	0.0051
1446056	rs2747693	a	g	99856	1.126	0.2602	+	-+--+-++-+-+-+++---+-+++-	0.0124	0.0074
1446057	rs2747695	a	c	99900	0.703	0.4822	+	++++--+----++++--++++---+	0.0028	0.005
1446058	rs2747698	c	g	8245	-0.442	0.6582	-	?????????????-???????-???	-0.0104	0.0214
1446059	rs2747701	a	g	99900	-0.858	0.391	-	+-++++-------+---+--++++-	-0.0062	0.005
1446060	rs2747702	a	t	99900	-0.477	0.6334	-	-++-+++++++----+-++--++-+	-0.0026	0.0065
1446061	rs2747703	t	c	92010	0.046	0.9632	+	+?++++-----+-+--++--++-+-	-5e-04	0.0053
1446062	rs2747705	a	g	99900	1.515	0.1298	+	-+-+++--++-+-+-+++++-+--+	0.014	0.0089
1446063	rs2747707	a	t	35676	0.612	0.5406	+	++??---??????+??+-??-?-?+	0.0142	0.0341
1446064	rs2747714	a	g	99150	-1.72	0.08536	-	--+--+-+----+-+-+-+---++?	-0.0085	0.0049
1446065	rs2747715	a	t	99150	-1.696	0.08995	-	--+--+-+----+-+-+-+---++?	-0.0084	0.0049
1446066	rs2747724	a	g	99900	-1.421	0.1553	-	--+--+-+----+-+-+-+---+++	-0.0069	0.0049
1446067	rs2747725	t	g	7807	1.417	0.1564	+	?????????????+???????????	0.027	0.0189
1446068	rs2747726	c	g	99900	0.095	0.924	+	-------+-----+-+++++++-++	-7e-04	0.0058
1446069	rs2747727	t	c	99900	0.109	0.9131	+	+++++++-+++++-+-------+--	0.0018	0.0058
1446070	rs2747730	a	g	15618	0.649	0.5164	+	?????????????+???????????	0.0754	0.1157
1446071	rs2747731	a	t	99900	-1.472	0.1411	-	--++-++-+---+-++----+++--	-0.0133	0.0111
1446072	rs2747734	t	g	99884	0.54	0.5895	+	++--++--++++++----+-+++++	0.0022	0.0049
1446073	rs2747737	t	c	99833	-0.562	0.5741	-	--+---++-----+++++-+++-+-	-0.0025	0.0054
1446074	rs2747738	a	g	99900	-1.1	0.2712	-	-+++-+--+---+-++----+-++-	-0.0113	0.0102
1446075	rs2747739	a	g	99900	1.398	0.1621	+	+--+--++-+++--+-++++-----	0.008	0.0054
1446076	rs2747740	a	g	99763	-0.24	0.8102	-	+++-++--+++-++----+---+-+	-0.002	0.0049
1446077	rs2747747	a	t	99900	-1.644	0.1001	-	+-++---+-----++++-+-+----	-0.0087	0.0055
1446078	rs2747748	a	c	96908	1.109	0.2673	+	-+--+++-+++++----+-+--+?+	0.0064	0.0056
1446079	rs2747752	t	g	99900	0.103	0.9181	+	+-+--+---++++-+-+-++++++-	-3e-04	0.006
1446080	rs2747753	t	g	99900	-0.4	0.6895	-	+++-++--+++-+-+---+-+-+++	-0.0041	0.0051
1446081	rs2747754	t	c	99900	-0.717	0.4736	-	+++-++--+-+-+-+---+-+-+++	-0.0056	0.0052
1446082	rs27479	a	c	91998	2.571	0.01014	+	+?++++-++--+++++++++-+++-	0.0159	0.0079
1446083	rs274790	t	c	98409	0.265	0.7911	+	---+---++-+++-+-+--+-++--	0.0032	0.0088
1446084	rs274791	a	g	98409	-1.061	0.2888	-	--+--+-+------+------++++	-0.0054	0.0053
1446085	rs274793	t	c	96906	-1.166	0.2437	-	--+--+-+------++-----++?+	-0.0057	0.0053
1446086	rs274794	t	c	98409	1.072	0.2838	+	++-++-+-++++++--+++++----	0.0055	0.0053
1446087	rs274795	a	g	98292	0.317	0.7514	+	+++-+++--+---+-+-++-+--++	0.0032	0.009
1446088	rs274796	a	g	98409	0.039	0.9686	+	+++-+++--+-----+-++-+--++	9e-04	0.0088
1446089	rs274797	a	g	98409	0.956	0.3388	+	+--++-++-++-+++++--+-++-+	0.0056	0.0055
1446090	rs274799	t	c	80570	0.956	0.3389	+	-+--?+?-??--+++?++?-???++	0.0252	0.0286
1446091	rs27480	t	c	99900	-2.874	0.004047	-	------+--++---------+---+	-0.0174	0.0074
1446092	rs274801	a	c	98409	-1.078	0.2809	-	--+--------+-----++-+-+--	-0.0054	0.0052
1446093	rs274807	a	g	98409	-1.121	0.2622	-	--+--------------++++-+--	-0.0057	0.0052
1446094	rs2748081	t	c	99900	0.311	0.7556	+	+-++-++++-+++---+++-+-+--	0.0014	0.0053
1446095	rs2748084	t	c	95716	1.026	0.305	+	+++--+-+-+---+++--?+-+--+	0.0054	0.0065
1446096	rs2748092	a	g	6450	-1.02	0.3078	-	-??????????????-????--???	-0.1188	0.1461
1446097	rs2748093	a	g	6450	-1.02	0.3077	-	-??????????????-????--???	-0.1185	0.1459
1446098	rs2748103	a	c	6058	-1.073	0.2832	-	-??????????????-?????-???	-0.1421	0.1585
1446099	rs2748105	t	c	846	-0.256	0.7978	-	????????????????????-+???	-0.065	0.2389
1446100	rs2748129	a	g	99900	-1.18	0.2379	-	--+-----+++++--+-----+---	-0.0057	0.005
1446101	rs2748132	a	g	99900	-1.096	0.273	-	--+--+--+++++--+-----+---	-0.0053	0.0049
1446102	rs2748137	a	g	99900	0.494	0.6211	+	+++--+-++++++------+++---	-6e-04	0.0063
1446103	rs2748138	t	c	99900	-2.371	0.01776	-	--+-+-+----+--+++++------	-0.0093	0.005
1446104	rs274814	t	c	10243	1.499	0.1339	+	?????????????+??????++???	0.0344	0.0213
1446105	rs2748140	a	g	99900	0.688	0.4915	+	+++--+-++++++------+++---	2e-04	0.0063
1446106	rs2748141	t	c	99900	0.421	0.674	+	+++--+-++++++------+++---	-0.0013	0.0063
1446107	rs2748142	t	c	99900	0.658	0.5104	+	+++--+-++++++------+++---	-1e-04	0.0063
1446108	rs2748144	t	c	99900	-0.663	0.5075	-	---++-+------++++++---+++	-1e-04	0.0063
1446109	rs2748146	t	c	89542	-1.784	0.07445	-	+---+-+---+--+??+---?++??	-0.0264	0.018
1446110	rs274815	t	c	9747	-0.145	0.8847	-	?????????????-+??????????	-0.0031	0.0168
1446111	rs2748153	t	c	99900	-0.685	0.4935	-	-+--+-+---+-+-+--++-++-++	-0.0087	0.014
1446112	rs2748155	t	c	95661	0.717	0.4736	+	?-++?--+++---+-+++-+-++--	0.0064	0.0162
1446113	rs2748156	a	g	99900	0.023	0.9815	+	+----+--++++-++-+-++-+-+-	-0.0023	0.0052
1446114	rs2748158	t	c	95661	-0.534	0.593	-	?+--?++---+++-+---+-+--++	-0.004	0.0162
1446115	rs2748160	t	c	94841	-0.373	0.7095	-	++---+----++++??+--+---+-	-0.0025	0.0139
1446116	rs2748166	a	g	99900	0.364	0.7155	+	+++---+-+-+---++++++-+-++	0.001	0.005
1446117	rs2748168	a	g	99900	-0.348	0.7278	-	---+++-+-+-+++------+-+--	-9e-04	0.005
1446118	rs2748169	t	c	99900	0.865	0.3873	+	------+--+++-+----++++-+-	0.0064	0.0083
1446119	rs2748172	a	c	99900	0.17	0.8649	+	-+++--------++--+--++-+-+	0.0017	0.005
1446120	rs2748173	t	c	96908	-0.084	0.9331	-	+----+--++++-++-+-++-+-?-	-0.0029	0.0052
1446121	rs2748174	t	c	99900	-0.423	0.6725	-	-+--++-++--++--+------+--	-0.0036	0.0076
1446122	rs2748177	c	g	99899	1.683	0.09231	+	+----+-+++-+-+++--+-+-+++	0.0086	0.0062
1446123	rs2748178	t	c	99900	1.51	0.1309	+	+----+-+++-+-+++--+-+-++-	0.0077	0.0062
1446124	rs2748193	t	c	3848	2.204	0.02751	+	??????????+?????????++???	0.0643	0.029
1446125	rs2748198	a	g	99894	-0.771	0.4407	-	++--+---++---+-++-+------	-0.0059	0.0058
1446126	rs27482	a	g	99900	-0.603	0.5465	-	+-+------++++--+++-----++	-0.0056	0.0055
1446127	rs2748202	a	g	99900	-0.828	0.4079	-	++--+---++---+-++-+------	-0.0063	0.006
1446128	rs2748205	t	c	99900	1.007	0.314	+	--++-+++--+++++--+-++++++	0.0071	0.006
1446129	rs2748206	a	c	99900	0.876	0.3808	+	--++-+++--+++-+--+-++++++	0.0063	0.0058
1446130	rs2748207	t	c	99829	0.834	0.4043	+	--++-+++--+++-+--+-++++++	0.0064	0.006
1446131	rs2748210	a	t	99900	-1.853	0.06384	-	-+-----+++--------+---++-	-0.0105	0.0049
1446132	rs2748216	t	c	99900	-0.99	0.3222	-	-+----+-++--+-+++++-+++++	-0.0066	0.0067
1446133	rs2748217	c	g	99900	-0.138	0.8902	-	+-++++-++-+--+-++-++----+	-0.0022	0.0062
1446134	rs2748219	t	c	94221	-0.408	0.6835	-	++-++--+-----+-+-+?+--+-+	-0.0039	0.0061
1446135	rs2748220	t	g	99900	-2.027	0.04269	-	+--+-+----+-----+-+++--+-	-0.0106	0.0049
1446136	rs2748222	a	g	99900	-2.056	0.03974	-	+--+-+----+-----+-+++--+-	-0.0108	0.0049
1446137	rs2748226	t	g	94222	-1.643	0.1004	-	-++------+-+--++--?-++-+-	-0.009	0.0058
1446138	rs2748229	c	g	99900	-0.907	0.3645	-	++++++-+--+---++-+--+++-+	-0.0045	0.0051
1446139	rs2748236	a	g	98406	-1.275	0.2023	-	+--++-----------+-+--+-+-	-0.0118	0.0065
1446140	rs2748238	t	c	98400	-0.923	0.3559	-	+--++--++------++-+--+-+-	-0.01	0.0064
1446141	rs2748240	a	g	99900	-0.395	0.6931	-	+++++--+--+---++-+--+++-+	-0.0018	0.0053
1446142	rs2748241	t	c	99879	0.355	0.7226	+	-----++-++-+++--+-++---+-	0.0015	0.0053
1446143	rs2748244	a	t	99900	-0.398	0.6903	-	+++++--+--+---++-+---++--	-0.0018	0.0054
1446144	rs2748249	a	c	73794	-0.359	0.7195	-	----+-+--+-++???--+-+--+-	-0.0018	0.0098
1446145	rs2748252	a	c	99900	-0.136	0.8916	-	----+-+++++-+++-+++-+-++-	0	0.0052
1446146	rs2748253	a	c	99900	-0.109	0.9134	-	-+-+++-----++--+---+-+---	-8e-04	0.0054
1446147	rs2748254	a	g	99900	1.814	0.06964	+	+++--+++--++---+++++-+++-	0.0137	0.0078
1446148	rs2748269	a	t	99900	2.285	0.02234	+	++-+-+++-+++-+--++---+++-	0.0112	0.0049
1446149	rs2748274	t	c	99900	2.396	0.01659	+	++-+-+++-+++-+--++---++++	0.0119	0.005
1446150	rs2748275	a	g	99900	-2.423	0.01538	-	--+-+---+---+-++--+++----	-0.0122	0.005
1446151	rs2748276	t	c	99882	1.092	0.2749	+	+-+++++-++--+++++++---+-+	0.0071	0.0056
1446152	rs2748278	c	g	95716	0.62	0.5351	+	+-+-+++++----++-++?-+++--	0.0052	0.0055
1446153	rs2748279	t	g	89907	0.807	0.4194	+	+-+-++++++---+??++?--++-?	0.0093	0.0086
1446154	rs2748282	a	c	95716	1.298	0.1941	+	+++----+-+++-+--+-?+-+-++	0.0056	0.0052
1446155	rs2748283	t	c	99900	0.287	0.7744	+	-+--+-+++-++++-++-+++++-+	0.0019	0.0049
1446156	rs2748285	a	g	99900	-0.314	0.7538	-	+-++-+---+----+--+-----+-	-0.0021	0.0049
1446157	rs2748287	a	g	99900	-0.336	0.7366	-	+-++-+---+----+--+-----+-	-0.0021	0.0049
1446158	rs2748289	t	c	99885	-1.164	0.2443	-	++-++----+--+-+-----+++-+	-0.0124	0.0107
1446159	rs2748290	a	c	99900	-0.976	0.3289	-	++-++----+--+-+-----+++-+	-0.0106	0.0107
1446160	rs2748293	a	c	99900	0.123	0.902	+	-++-+-----++-++--++-++++-	9e-04	0.0055
1446161	rs2748294	a	g	99900	-0.115	0.9086	-	++++--++++--++-++--+----+	-0.0013	0.0054
1446162	rs2748297	a	g	99900	-0.736	0.4618	-	+++-+----++--++----++++-+	-0.005	0.0065
1446163	rs2748298	a	c	99900	0.796	0.4258	+	-++++-+-+-+-++++----++-+-	0.0056	0.0064
1446164	rs27483	t	c	10230	0.458	0.6467	+	?????????????+??????--???	0.0072	0.0165
1446165	rs2748324	t	c	99900	-0.641	0.5214	-	--+-----+-++++---+--+++++	-0.0043	0.007
1446166	rs2748331	t	c	99900	0.353	0.7238	+	--++-+-+-+---++---+-+++++	9e-04	0.0054
1446167	rs2748334	a	g	93882	-0.793	0.4278	-	--?-++--++-----?+++-++-+-	-0.0149	0.0157
1446168	rs2748335	a	g	93870	0.719	0.4722	+	++?+--++--+++++?---+--+-+	0.0141	0.0158
1446169	rs2748341	a	c	98342	-0.698	0.485	-	++-++-+-++------+-++-+++-	-0.0032	0.005
1446170	rs2748343	t	c	98406	-0.45	0.6525	-	++-++-+-++------++++-++++	-0.0024	0.0051
1446171	rs2748348	a	g	98406	0.356	0.7215	+	++--+-+-+++-----++++-+-+-	0.0015	0.0055
1446172	rs2748353	t	c	99899	-0.135	0.8925	-	+--++++---++---++--+-++++	-8e-04	0.0049
1446173	rs2748354	a	g	99900	0.562	0.5742	+	++-+--+-++-+++-+-+-+++-+-	0.0041	0.0049
1446174	rs2748359	t	g	99900	-1.083	0.2786	-	+++++++-+---+---+-++---+-	-0.0066	0.0052
1446175	rs2748363	t	c	95716	1.696	0.0899	+	---+++-+++++-++-+-?--++-+	0.0065	0.0051
1446176	rs2748364	c	g	99900	1.149	0.2504	+	+---+--++-++-++-+-+--++++	0.0032	0.005
1446177	rs2748368	t	c	99900	0.146	0.8837	+	++++--+-+--++-++-+-++--++	0.0028	0.0053
1446178	rs2748369	t	c	99900	-0.075	0.9403	-	----++-+-++--+--+-+--++--	-0.0024	0.0053
1446179	rs2748372	t	c	99900	0.01	0.9923	+	+---++++-++--+--+-+--++-+	-7e-04	0.0063
1446180	rs2748376	t	c	89030	0.448	0.654	+	+?++--+-++-+++-+-+-+---?+	0.0033	0.0053
1446181	rs2748377	c	g	96871	-0.436	0.6626	-	-+--++-+--+---+-+-+--++?-	-0.0031	0.0051
1446182	rs2748378	a	g	96908	0.441	0.6591	+	+-++--+-++-+++-+-+-++--?+	0.0031	0.0052
1446183	rs274838	a	g	99892	0.013	0.9894	+	-+++---+-++-+++------++-+	6e-04	0.0088
1446184	rs2748385	a	g	99900	-0.048	0.9619	-	-++-++++--++--------++-+-	7e-04	0.005
1446185	rs2748391	a	g	99841	0.522	0.6019	+	-+++-+++++++--+-+--+++-+-	0.0045	0.0055
1446186	rs2748398	c	g	99896	0.366	0.7142	+	-+-+-+-++----+--++--+-+++	0.001	0.0053
1446187	rs2748402	a	g	99900	2.408	0.01606	+	++-+-+++--+++++-+--++-++-	0.0225	0.0091
1446188	rs2748403	t	c	99900	0.183	0.8546	+	-+-+-+-++----+--++--+-++-	-1e-04	0.0053
1446189	rs2748404	a	c	38552	0.068	0.9455	+	+??-??????+??-++????-+??+	4e-04	0.0089
1446190	rs2748406	t	g	99668	0.96	0.3368	+	++-+-+-----++++++---+-++-	0.0031	0.0049
1446191	rs2748410	a	g	10233	-0.242	0.8085	-	?????????????-??????-+???	-0.0039	0.0167
1446192	rs2748411	t	c	8876	0.823	0.4108	+	?????????????+??????+????	0.016	0.0184
1446193	rs2748413	t	c	95716	-1.127	0.2596	-	--+-+-++-++-------?+-+--+	-0.0043	0.005
1446194	rs2748414	a	g	99846	0.812	0.417	+	++++-+++-+++----+++++--++	0.0057	0.005
1446195	rs2748415	t	c	99900	-1.287	0.1982	-	--+-+-+++++-------+++---+	-0.0058	0.0051
1446196	rs2748416	t	g	99900	-1.102	0.2705	-	----+-+-+++---+--+++-+---	-0.0085	0.0086
1446197	rs2748418	a	g	95716	1.571	0.1163	+	+-++-+++--+++++++-?---++-	0.0077	0.0052
1446198	rs2748419	c	g	99900	0.641	0.5212	+	++-+-+-----++++++---+-+++	0.0017	0.005
1446199	rs274842	a	g	92030	-0.703	0.4823	-	-?-+---------++----+-++++	-0.0048	0.0052
1446200	rs2748421	a	g	38552	0.682	0.4955	+	-??-??????-??+++????-+??-	0.0066	0.0083
1446201	rs2748423	a	c	99900	-2.115	0.03439	-	--+-+---++-----+-++--+--+	-0.0204	0.009
1446202	rs274844	c	g	99809	-0.475	0.6348	-	+--+---+-----+++----+--+-	-0.0045	0.0053
1446203	rs274845	a	g	99856	0.174	0.8618	+	-++-+++-+++++---++++--+--	0.0029	0.0053
1446204	rs274846	a	g	99888	-0.758	0.4487	-	---+---------++----+-++++	-0.0046	0.005
1446205	rs2748482	t	c	99900	0.115	0.9086	+	++--+-+++---+++-++++-++--	0.0026	0.0049
1446206	rs2748483	a	t	99750	0.2	0.8415	+	++--+-++-+--+++-++++-++-+	0.0031	0.0049
1446207	rs274849	t	g	59065	-1.191	0.2337	-	??+-??-????-?-???---??--?	-0.053	0.0398
1446208	rs2748490	t	g	99900	-0.086	0.9312	-	--++-+---+++---+----+--++	-0.0025	0.0049
1446209	rs2748498	c	g	99900	0.113	0.9104	+	++--+-+++---+++-++++-++-+	0.0026	0.0049
1446210	rs2748499	t	c	99900	-0.027	0.9781	-	++--+-+++---+++-++++-++--	0.002	0.005
1446211	rs27485	a	g	99900	-1.834	0.0667	-	+-+-----+--+-----++-+----	-0.0122	0.0061
1446212	rs274850	a	g	99142	0.415	0.6783	+	-++-+++-+++++---++-+--+-?	0.005	0.0054
1446213	rs2748500	a	c	99900	0.071	0.9431	+	++-+-+---++++--+----+--++	-0.002	0.005
1446214	rs2748502	a	g	99150	0.02	0.9837	+	----+-+++---+++-++++-++-?	0.0018	0.005
1446215	rs2748503	t	c	99150	-0.092	0.927	-	--+-+-+++---+-+-++++-++-?	0.0028	0.0051
1446216	rs274851	t	c	11128	-1.285	0.199	-	??????????????-??+-???--?	-0.1046	0.0923
1446217	rs2748516	a	g	96781	0.202	0.8395	+	-+++-+-+--+-+++?---+--++-	-4e-04	0.0118
1446218	rs274852	t	c	99892	0.461	0.6445	+	-++-+++-+++++---++-+--+--	0.0052	0.0054
1446219	rs2748525	a	g	99900	0.492	0.6227	+	-+---+----+-++++---+--+++	0.0034	0.0079
1446220	rs274853	a	g	11128	-1.291	0.1969	-	??????????????-??+-???--?	-0.1047	0.0925
1446221	rs2748531	a	g	99900	0.32	0.7493	+	-+---+----++++++-+-+-++++	0.0024	0.0072
1446222	rs2748549	t	g	96892	0.313	0.7539	+	++-+-+++--+++--+++++---?-	0.0035	0.0098
1446223	rs274856	t	c	94225	-0.28	0.7793	-	-+--+++-+++--+-+++?----++	-0.0016	0.006
1446224	rs274857	a	g	98409	0.113	0.9097	+	++-+-+--++-+--+++++++--+-	8e-04	0.0088
1446225	rs274858	a	g	90498	-0.274	0.7837	-	-?--+-++-+--++-++---++--+	-0.0013	0.0099
1446226	rs274859	a	g	98409	-0.459	0.646	-	++-+-+--++-+--+++++++--+-	-0.0032	0.0083
1446227	rs274860	a	g	98409	0.832	0.4057	+	-+-+---++-+--+++++++-++++	0.0082	0.0119
1446228	rs274861	a	g	98333	0.727	0.4672	+	+-+-+-++++-++---++-++--++	0.0042	0.005
1446229	rs2748653	a	g	7807	-0.646	0.5182	-	?????????????-???????????	-0.0174	0.0269
1446230	rs2748663	t	c	98409	0.348	0.7279	+	-+++++-+--+++--+-++--+--+	0.001	0.0055
1446231	rs2748664	t	c	96908	0.737	0.4612	+	+---+-+++++-++-+--+-+++?-	0.0037	0.005
1446232	rs2748665	t	c	96908	-0.354	0.7233	-	+-----+-++-+-++-+--++-+?-	-0.001	0.0055
1446233	rs2748666	t	c	95138	-0.539	0.5896	-	-+++-+-----+?-+-++-+-+-?+	-0.0028	0.005
1446234	rs2748682	a	g	99871	0.293	0.7692	+	-++--++--++++-++++-++-++-	0.006	0.005
1446235	rs274869	a	g	98409	-1.19	0.2339	-	-----+-------+++--+--++--	-0.0066	0.005
1446236	rs27487	a	g	96908	1.428	0.1532	+	-+++-+-+-+-+++---+---++?+	0.0091	0.0077
1446237	rs2748702	c	g	99727	-1.093	0.2744	-	--+--++-+---+-----++--+--	-0.0028	0.0051
1446238	rs2748704	c	g	7807	-0.67	0.5028	-	?????????????-???????????	-0.0161	0.0239
1446239	rs2748711	t	c	34851	0.678	0.4981	+	?-???-?????+????????++???	0.0212	0.0338
1446240	rs274873	t	c	98409	-1.013	0.3109	-	-+---+---+---+++-----++--	-0.0052	0.0049
1446241	rs2748751	t	g	62013	-0.428	0.6684	-	-???++?????-?++---?---+?+	2e-04	0.0069
1446242	rs2748752	a	g	93815	-1.571	0.1162	-	--------??+--+-++----?-+?	-0.0183	0.0118
1446243	rs274876	a	g	96152	-1.17	0.242	-	-+---+----+-+-+++----++??	-0.0061	0.0051
1446244	rs2748762	a	g	99723	1.176	0.2396	+	-+++----+++++--++++++-+++	0.0054	0.0056
1446245	rs2748763	a	g	91605	-0.392	0.6952	-	+-+---+++++-+++?----++--+	-0.0016	0.0074
1446246	rs2748770	t	g	99900	0.558	0.5771	+	-+++----++-++-++-++++-+++	0.0016	0.0053
1446247	rs2748771	t	c	99900	-0.714	0.4752	-	+---++++--+--+--+----+---	-0.0025	0.0053
1446248	rs2748772	a	g	99900	0.943	0.3458	+	-+++----++-++--++++++-+++	0.0044	0.0052
1446249	rs2748775	t	c	99900	-0.993	0.3209	-	+---++++--+--++------+---	-0.0048	0.0052
1446250	rs2748776	t	c	96781	0.213	0.8311	+	-+-++++----+---?++++--++-	0.0012	0.007
1446251	rs2748777	a	g	99900	1.007	0.314	+	-+++----++-++--++++++-+++	0.0047	0.0051
1446252	rs2748778	a	g	99852	-0.959	0.3376	-	+---++++--+--++------+---	-0.0047	0.0052
1446253	rs2748782	c	g	96781	-1.04	0.2986	-	+-+----++++-+++?----+----	-0.0064	0.0064
1446254	rs2748783	t	c	98270	-1.084	0.2783	-	+---++++--+-?++------+---	-0.0062	0.0052
1446255	rs2748784	t	c	99900	1.158	0.247	+	-++++---++-++--++++++-+++	0.0058	0.0051
1446256	rs2748785	t	c	96781	-0.677	0.4984	-	+-+----++++-+++?----+-+-+	-0.0042	0.0064
1446257	rs2748786	t	c	96781	-0.597	0.5502	-	+-+----++++++++?----+-+-+	-0.0048	0.008
1446258	rs2748787	t	g	96781	0.724	0.4692	+	-+-++++----+---?++++-+-+-	0.0043	0.0063
1446259	rs2748788	t	c	80713	-0.268	0.7884	-	---?-++-??+-++-+-+?---??-	0	0.009
1446260	rs2748789	a	g	96781	-0.978	0.3278	-	+-+----++++-+++?----+-+-+	-0.0062	0.0064
1446261	rs27488	t	c	99894	0.999	0.318	+	+++++--+-+-+-++-+-++---++	0.0024	0.0056
1446262	rs2748800	a	c	88734	-0.234	0.8152	-	?--+-+++----++-?++-?+++?-	0.0011	0.0061
1446263	rs2748804	t	g	92724	0.788	0.4305	+	+-+-+-++--+++-++--?-+++?+	0.0036	0.006
1446264	rs2748805	t	c	92724	0.9	0.368	+	+-+-+-++--+++-++--?-+++?+	0.0042	0.006
1446265	rs2748809	t	c	99179	-0.471	0.6374	-	-+---++--++-+--++++--+-++	-0.0022	0.0055
1446266	rs2748814	a	c	99900	-0.956	0.3389	-	--+-++---+++---+++-----++	-0.0052	0.0063
1446267	rs2748819	a	g	96866	-1.355	0.1754	-	+-++-++---+----+--++-++?-	-0.0062	0.0055
1446268	rs2748821	t	c	99861	1.183	0.2367	+	----++-+--++++++++-++---+	0.0062	0.0064
1446269	rs2748824	a	g	99012	1.553	0.1204	+	+++-++-+--+-++-+-+-+-+++?	0.0079	0.0058
1446270	rs2748829	t	c	99145	-0.206	0.8365	-	+--+++++--++--+-+++-----?	-0.0026	0.0073
1446271	rs274883	a	g	97659	-0.329	0.7422	-	+++--+++-++-+-+-----+---?	-0.0023	0.0065
1446272	rs2748881	t	c	84769	-0.617	0.5372	-	+--++---++---+??+-?---++?	-0.012	0.0178
1446273	rs2748901	a	g	80395	-0.466	0.6411	-	--?-++-????+?--+-+?-+-+++	-0.003	0.0057
1446274	rs274893	t	g	10252	0.499	0.618	+	?????????????+??????-+???	0.0082	0.0157
1446275	rs2748937	c	g	99789	0.692	0.4891	+	++---++----++-+++---+--++	0.0033	0.0049
1446276	rs2748938	c	g	96901	0.325	0.7452	+	++---++----++-+++---+--?-	0.0018	0.005
1446277	rs2748944	t	c	99817	-0.404	0.686	-	-----++++---+++++-------+	-0.0011	0.0069
1446278	rs2748948	a	t	99900	-0.519	0.6041	-	-----++++---+++++-------+	-0.0017	0.0068
1446279	rs2748953	a	t	99900	-0.41	0.682	-	++++-----------++--+-+-+-	-0.0038	0.0051
1446280	rs2748955	c	g	99900	0.526	0.5991	+	+++-+----+++-+---+++++++-	0.002	0.0068
1446281	rs2748956	c	g	99900	-0.543	0.5873	-	---+-++++---+++++-------+	-0.0018	0.0068
1446282	rs2748957	t	c	99900	-0.795	0.4267	-	--++---++----+++---+-++-+	-0.0049	0.0051
1446283	rs274897	c	g	98283	0.555	0.5787	+	+-+-+-++++-+-----+-++--+-	0.0036	0.005
1446284	rs2748975	a	c	99008	0.289	0.7729	+	++---+++-+++-+----+----++	0.0012	0.008
1446285	rs2748981	a	g	99900	-0.316	0.7523	-	+++----+--+-+--+--+----++	-0.004	0.0054
1446286	rs274899	a	g	36612	-0.818	0.4131	-	-??-??????-??-?-????++??+	-0.0082	0.0105
1446287	rs2748990	t	c	99900	-2.41	0.01594	-	----+++-----+-------+-+-+	-0.0093	0.0063
1446288	rs2748991	t	c	9747	1.983	0.04734	+	?????????????+-??????????	0.0372	0.018
1446289	rs2748992	a	g	99803	2.527	0.01149	+	-+++++----++++-++-+++-+++	0.0114	0.0055
1446290	rs2748994	t	g	99900	1.063	0.2877	+	---+++----++++-++-+++-+++	0.0039	0.0053
1446291	rs2748995	t	g	99900	-0.981	0.3265	-	+++--++++-+---+--++--++--	-0.0062	0.008
1446292	rs2748998	t	c	99900	-2.198	0.02792	-	++--++++---+--+---+--+---	-0.0087	0.005
1446293	rs2749	t	c	99900	0.119	0.9052	+	+-+++---+-+-++-++++++++++	-0.0022	0.0084
1446294	rs274900	a	c	96907	0.103	0.9177	+	+++--+-+-+---++--++-+--?-	-0.0011	0.0127
1446295	rs2749007	a	t	99900	-2.771	0.005597	-	----+-+-------+-+----+-+-	-0.0122	0.0053
1446296	rs2749008	t	c	98162	2.472	0.01343	+	++++-+-+++++?+-+-++++-+-+	0.0111	0.0054
1446297	rs2749010	t	c	99882	2.866	0.004153	+	++++-+-+++++++-+-++++-+-+	0.0126	0.0053
1446298	rs2749014	a	g	7807	2.524	0.01162	+	?????????????+???????????	0.0535	0.0211
1446299	rs2749017	a	g	69067	1.15	0.2501	+	?-++-+-+----+?-?-+?-+-+-+	0.0112	0.0097
1446300	rs2749024	a	t	99900	2.847	0.004419	+	+-++-+-+++-+++-+-+-++---+	0.0129	0.0054
1446301	rs2749026	a	g	10240	-2.9	0.003726	-	?????????????-??????-+???	-0.0511	0.0177
1446302	rs2749029	a	g	99891	-2.896	0.003778	-	----+-+-------+-+----+-+-	-0.0128	0.0053
1446303	rs2749035	a	g	99900	2.498	0.01248	+	-+++-+-+++++++-+-+-++-+++	0.0112	0.005
1446304	rs2749046	t	c	99900	-1.149	0.2507	-	--+-+-+---+---+-----+-++-	-0.0053	0.0063
1446305	rs2749047	t	g	99900	-0.845	0.3982	-	---+--++--++--+++---+-++-	-0.005	0.0065
1446306	rs2749048	t	c	99900	-0.026	0.9789	-	++++--++------+++----+++-	-5e-04	0.0051
1446307	rs2749050	a	g	7807	0.029	0.9772	+	?????????????+???????????	5e-04	0.0187
1446308	rs2749051	t	g	99900	1.888	0.05905	+	-++++-++++-+++---+++-++--	0.0139	0.0072
1446309	rs2749052	a	g	96742	1.119	0.2633	+	-+++--+-++--++--+-+-+++?+	0.0066	0.0053
1446310	rs2749054	a	g	99863	0.526	0.5989	+	+++++---++--++--+-+++++++	0.0013	0.0049
1446311	rs2749055	t	g	99881	-1.22	0.2223	-	+----+----++--++-+------+	-0.0062	0.0049
1446312	rs2749056	t	c	99508	0.369	0.7119	+	--+++-++++--+++--+-+-+---	0.0041	0.0095
1446313	rs2749057	a	g	95716	-0.682	0.4953	-	+---++--+-+---++-+?--+-0+	-0.0045	0.0054
1446314	rs274906	c	g	1855	-1.388	0.165	-	?????????????????-????-??	-0.2912	0.2097
1446315	rs2749060	t	c	38552	-0.135	0.8924	-	+??-??????+??-++????-+??+	-0.0025	0.0086
1446316	rs2749064	c	g	99900	0.13	0.8966	+	-+---+-+++-++--+++++-++++	0.0017	0.0096
1446317	rs2749065	t	c	99900	-0.018	0.9859	-	-+---+-+++-+++-+++-+-+++-	3e-04	0.0096
1446318	rs274907	t	g	98409	0.339	0.7348	+	++-+-+-----+++-++-+--+--+	-4e-04	0.0055
1446319	rs2749072	a	g	99880	0.19	0.8491	+	+-++----++--+++-++++++-++	0	0.0049
1446320	rs2749074	t	c	99900	0.171	0.8639	+	-+-+++++--++---+-+----+--	0.0016	0.0049
1446321	rs2749075	a	t	99900	0.435	0.6639	+	++-++--+++---+---+-+-+-++	8e-04	0.0051
1446322	rs2749080	t	c	99900	0.237	0.8124	+	+++++---++--++--+-+++++++	-1e-04	0.0049
1446323	rs2749081	a	g	99900	-0.779	0.4363	-	--+--++---+++-+++---+---+	-0.0019	0.0051
1446324	rs2749083	a	c	92597	0.968	0.3331	+	--++++----++++-?-+?+++-++	0.0085	0.0093
1446325	rs2749086	a	g	99900	1.376	0.1687	+	-+-+++---++++++++--++--++	0.0054	0.0051
1446326	rs2749097	c	g	96896	0.326	0.7444	+	---++++++---++--++-++++?-	0.0049	0.0065
1446327	rs27491	a	g	97210	0.152	0.8789	+	---++--++-++++?-+--+++--?	9e-04	0.0131
1446328	rs2749100	t	g	99884	0.391	0.6959	+	+++------+++-++++-+--+-+-	-0.0013	0.006
1446329	rs2749111	t	c	9665	0.445	0.6561	+	???????--+???????+???????	0.0225	0.0747
1446330	rs2749119	a	g	99900	0.738	0.4607	+	++++-++++--++-+++++--+---	0.0033	0.005
1446331	rs2749122	a	c	98409	-1.285	0.1989	-	-------+----++-++-+-+-+-+	-0.0064	0.005
1446332	rs2749129	a	c	99900	-1.122	0.262	-	-----+---+-+-+----+-+++-+	-0.0066	0.0061
1446333	rs2749130	a	g	99900	1.142	0.2533	+	+++++-+++-+-+-++++-+---+-	0.0066	0.0061
1446334	rs2749131	t	c	99900	2.013	0.04406	+	--+++--++-+-++++++++++-+-	0.0111	0.006
1446335	rs2749132	t	c	99900	2.004	0.04508	+	--+++--++-+--+++++++++-+-	0.0112	0.006
1446336	rs2749133	t	c	99900	-0.805	0.4207	-	-+--+++--+-++--------++-+	-0.0041	0.0063
1446337	rs2749134	a	t	99900	0.792	0.4285	+	+-++---++-+--++++++++--+-	0.004	0.0063
1446338	rs2749135	a	g	99900	1.06	0.2894	+	++++-+++-+-+-+++-+-+-+-+-	0.0058	0.0054
1446339	rs274914	a	g	41247	-2.612	0.009001	-	?-+?-----+??-++?-+-+??+-?	-0.0197	0.0078
1446340	rs2749146	t	c	99770	0.817	0.414	+	+++---++++--++-+--+--++++	0.0059	0.0066
1446341	rs274915	a	g	95700	-0.527	0.5982	-	-++--++++---+-+-+-?--+++-	-0.002	0.0054
1446342	rs2749152	a	g	99900	-0.915	0.3604	-	-+-+---++----+---++--+++-	-0.0065	0.0065
1446343	rs274916	a	g	95716	0.771	0.4406	+	-+--+-++--++-+-+--?-++--+	0.0167	0.0169
1446344	rs274917	a	c	99861	-0.058	0.9536	-	--+--+-+++---++-++-+++-+-	3e-04	0.0095
1446345	rs274918	t	c	99859	0.192	0.848	+	-+--+++++++--++-+--+++-+-	0.0095	0.0123
1446346	rs27492	a	t	99900	-0.314	0.7533	-	-+---+---+++--++-++-+-+-+	-0.0028	0.0074
1446347	rs274923	t	g	99900	-0.274	0.7839	-	+--+----+--++--+-++---+-+	-0.0063	0.0119
1446348	rs2749245	c	g	99900	-1.649	0.09919	-	-----------+--------+--++	-0.0091	0.0051
[truncated: 1 more rows]

## Sheet: LDL
	V1	V2	V3	V4	V5	V6	V7	V8	V9	V10
304605	rs11161304	a	g	93992	1.312	0.1896	+	++++------++++++-+++-+--+	0.0059	0.0057
304606	rs11161309	t	c	93934	-0.234	0.8148	-	-++----+--++-+---+++-+-+-	-0.0011	0.0054
304607	rs11161311	a	t	93999	-1.372	0.1702	-	+-+-----++----+++++-+----	-0.014	0.01
304608	rs11161313	a	g	93999	1.244	0.2134	+	-+-+++++--++++-----+-++++	0.0131	0.01
304609	rs11161315	t	c	93999	-0.618	0.5367	-	+++++-+--++----++++-+-+++	-0.0042	0.0054
304610	rs11161318	a	g	93953	-1.05	0.2939	-	-+-----+---+--+--++-+++--	-0.0083	0.0096
304611	rs11161319	t	c	93999	0.548	0.5838	+	--++++----++---++-+-+++++	0.003	0.0056
304612	rs1116132	t	c	7776	0.311	0.7555	+	?????????????+???????????	0.006	0.0192
304613	rs11161320	t	c	37225	-0.143	0.8866	-	?-+?+-+-++??++??--+-??--?	-0.0038	0.0133
304614	rs11161324	a	g	93999	0.948	0.3433	+	+--+---+++--+++---+-+-+++	0.0024	0.0058
304615	rs11161327	a	g	93999	-1.533	0.1253	-	-++-++----+---++++-+-----	-0.0074	0.0068
304616	rs11161328	a	g	89838	0.833	0.4049	+	+-++-+-+-+-+-++++-?-++++-	0.0042	0.0066
304617	rs11161329	a	t	89838	-0.027	0.9782	-	--++-+--+++---++--?+---++	0.0013	0.0059
304618	rs11161330	a	g	93999	0.029	0.9765	+	++---+++-+-++-----+-+++--	-1e-04	0.0053
304619	rs11161331	a	g	623	-1.269	0.2045	-	????????????????????-????	-0.3101	0.2433
304620	rs11161340	a	g	93314	-0.865	0.3868	-	+-+----+--+-++--++--+---+	-0.0081	0.0088
304621	rs11161341	a	g	93999	0.162	0.8717	+	+-++-+-++-+--++-+++-+--++	2e-04	0.0053
304622	rs11161342	t	c	93999	0.149	0.8813	+	+-++-+-++-+--++-+++-+--++	-1e-04	0.0053
304623	rs11161343	t	c	93999	0.081	0.9356	+	+-++-+-++-+--++-+++-+--++	-4e-04	0.0053
304624	rs11161347	a	g	90934	0.997	0.3189	+	+++-+?-++++-+++++-------+	0.005	0.0056
304625	rs11161353	t	c	93999	-1.854	0.06379	-	----+---+-+-+------+++-+-	-0.0121	0.0077
304626	rs11161356	a	g	93999	0.603	0.5464	+	+-+--+++--++-++-+-+-+---+	0.0025	0.0066
304627	rs11161357	c	g	93999	-0.57	0.569	-	-+-++---++--+--+-+-+-+++-	-0.0023	0.0066
304628	rs11161358	a	t	93999	0.853	0.3934	+	+-+-++---+++++-++--++-++-	0.005	0.0064
304629	rs11161359	t	c	93999	0.493	0.6217	+	-+-++--+-++++-+++++--++-+	0.0064	0.0092
304630	rs11161360	t	c	93999	-0.134	0.8936	-	-+--+-+-++++--++++-+-+++-	2e-04	0.0053
304631	rs11161361	a	g	93964	0.039	0.9689	+	+-++++-+++---+---+-++--+-	-9e-04	0.0054
304632	rs11161362	a	g	93999	-0.376	0.7073	-	+-++++-++++--+---+-++--+-	-0.003	0.0056
304633	rs11161363	c	g	93999	-0.441	0.6595	-	+-++++-++++--+---+-++--+-	-0.0034	0.0056
304634	rs11161364	a	g	93999	0.212	0.8321	+	-+--+-+-++++--++++-+++++-	0.0024	0.0057
304635	rs11161367	a	g	89838	-0.789	0.4302	-	+-++-+-----+++-+--?----+-	-0.0055	0.006
304636	rs11161368	a	g	93999	0.239	0.8111	+	+--+-+-----+++-+++-+---+-	5e-04	0.0053
304637	rs11161371	a	c	93991	0.79	0.4293	+	-+--+-+++++-+-+-+-++++++-	0.0055	0.0058
304638	rs11161380	t	c	90917	-0.403	0.6873	-	-++------+-+-+-?--+-+++-+	-0.0028	0.0079
304639	rs11161384	a	g	93999	0.002	0.9986	+	+---++---+++++--+++-+++++	-2e-04	0.0071
304640	rs11161385	a	g	93999	-0.205	0.8377	-	++--+++---+-++--+-++--+-+	-0.0019	0.0052
304641	rs11161386	a	g	93903	0.187	0.8518	+	--++---+++-+--++-+--+--+-	0.0017	0.0052
304642	rs11161391	t	c	93986	-0.35	0.7266	-	-+++--+-++----++-+--++---	-0.0015	0.0081
304643	rs11161396	t	c	93999	-0.863	0.3882	-	-++-+-+-+-----+---++-+--+	-0.0047	0.0053
304644	rs11161397	t	c	93999	-0.173	0.863	-	-++-++--+----++++-+--++-+	-2e-04	0.0057
304645	rs11161398	a	t	10094	-0.239	0.8113	-	?????????????-??????+-???	-0.0041	0.0161
304646	rs11161401	a	g	93999	-0.155	0.8771	-	-+-++--+-+-++-++-+--+----	-7e-04	0.0064
304647	rs11161402	c	g	93999	-0.033	0.9735	-	-++-+--+--+--+--+-++-++++	0	0.0058
304648	rs11161404	a	g	93999	-0.881	0.3785	-	+--++++-+--+---+-+-+-----	-0.0051	0.0054
304649	rs11161411	t	c	90917	-0.411	0.6811	-	+++++++------++?-+-+-----	-0.0037	0.007
304650	rs11161416	c	g	93999	1.377	0.1684	+	+++-+-++-----++++-+++++++	0.0084	0.0075
304651	rs11161418	a	g	93999	-1.893	0.05834	-	---+-++-+---++---+-+-----	-0.0095	0.0056
304652	rs11161420	t	c	93999	-0.656	0.5118	-	+++++++-+-----+----++----	-0.0054	0.0071
304653	rs11161427	t	c	93999	0.871	0.3837	+	+++++----+-+--+++++++----	0.0037	0.0055
304654	rs11161435	a	t	91622	0.518	0.6043	+	+---+---+-++-++?-+++----?	9e-04	0.0071
304655	rs11161436	t	c	91593	0.46	0.6455	+	+---+---+-++-++?-+++----?	6e-04	0.0071
304656	rs11161438	a	g	89783	0.46	0.6455	+	-+-+-++++--+--??+++-++-+?	0.0104	0.0118
304657	rs11161440	t	c	95454	-1.23	0.2186	-	--+--+--++--++--++--++++-	-0.0061	0.0055
304658	rs11161441	t	c	95454	-1.287	0.1979	-	--+--+--++--++--++--++++-	-0.0065	0.0055
304659	rs11161442	a	g	95200	-2.691	0.007132	-	+-+--+--++--+-----+--+++-	-0.0151	0.0053
304660	rs11161444	t	c	95454	2.691	0.007128	+	-+-++-++--++-+++++-++---+	0.0148	0.0052
304661	rs11161445	t	c	95454	-2.263	0.02365	-	+-+------+-----+----+++++	-0.0132	0.006
304662	rs11161447	a	t	95454	0.203	0.8391	+	+-----++-+-+-++--++-++---	2e-04	0.0058
304663	rs1116145	a	c	95454	-0.259	0.7957	-	+-----++-+-+---++++-++-++	-0.0021	0.0052
304664	rs11161451	t	g	95454	-0.415	0.6783	-	--+------+++++-++--+----+	-0.0011	0.0057
304665	rs11161452	t	c	95454	-0.248	0.8041	-	--++-+-++-++++-+-+-+-----	-0.001	0.0055
304666	rs11161453	a	g	95454	-1.366	0.1718	-	+-+-----+++++--+--+--+++-	-0.0183	0.0105
304667	rs11161454	a	g	92482	-0.577	0.5639	-	--++-+--+++++--++--+-+-?+	-0.003	0.0056
304668	rs11161455	a	g	95454	0.293	0.7695	+	---+-+++++---++--+-++++-+	0.0039	0.0073
304669	rs11161457	a	g	89128	1.014	0.3106	+	+-?++++-+-+-++??++++-++++	0.013	0.0174
304670	rs11161458	a	g	90967	-1.06	0.289	-	-+?----+-+-+--+?----+----	-0.0135	0.0172
304671	rs11161464	a	g	87526	0.469	0.6388	+	+?+--+++-----+---++++--+-	0.0015	0.0062
304672	rs11161465	t	c	95355	0.542	0.5876	+	-+++++--+-+-++--+--+-++++	0.0038	0.0057
304673	rs11161473	t	g	10105	0.528	0.5972	+	?????????????+??????-+???	0.0084	0.0171
304674	rs11161475	a	t	95430	0.995	0.3197	+	++-+++++-++-+++++++-+-+++	0.0046	0.0055
304675	rs11161482	a	g	95454	-0.131	0.8955	-	-+++---++++-++++---++--+-	0.0012	0.0057
304676	rs11161487	a	g	93654	-0.367	0.7137	-	-+-+--+++-++?++-+--++--+-	1e-04	0.0063
304677	rs11161488	t	c	95454	-0.587	0.5573	-	+--++-+-+++-+-+------++++	-0.0044	0.006
304678	rs11161489	a	c	95454	-0.703	0.4821	-	+--++-+-++--+-+------++-+	-0.005	0.0058
304679	rs11161493	a	t	92503	-0.369	0.7118	-	-+-+++---++-++------+-+?+	-0.001	0.0055
304680	rs11161494	a	c	35729	-0.608	0.543	-	?+-?+-+--+??-+??----??+??	-0.0035	0.0082
304681	rs11161497	a	g	92503	-1.309	0.1906	-	++--+-+--++----------++?+	-0.0069	0.0053
304682	rs11161498	t	g	92503	1.362	0.1731	+	--++-+-++--++++++++++--?-	0.0071	0.0053
304683	rs11161510	t	c	92486	-0.61	0.5418	-	---+++---++--+-+-----++?+	-0.0022	0.0057
304684	rs11161511	t	c	92271	-0.61	0.542	-	---+++---++--+-+----+++?+	-0.0022	0.0057
304685	rs11161512	t	c	95454	-0.857	0.3912	-	++----+-++----+-+--+---++	-0.0058	0.0069
304686	rs11161513	a	c	95454	1.19	0.234	+	--++-+-++--++++++++++----	0.0059	0.0052
304687	rs11161514	a	g	95454	-1.255	0.2096	-	++--+-+--++----------++++	-0.0062	0.0052
304688	rs11161516	a	g	95454	0.478	0.6324	+	-+----+++----+---++-+++++	0.0034	0.0084
304689	rs11161517	a	g	95454	0.829	0.4069	+	-+++----+-+--+-++--+++---	0.0066	0.0069
304690	rs11161518	c	g	95454	-1.295	0.1953	-	++--+-+--++-+-+--+---++++	-0.0073	0.0054
304691	rs11161519	a	g	95421	0.883	0.3775	+	--++-++-+--+-+-+++++++---	0.0046	0.0053
304692	rs11161520	c	g	95454	0.934	0.3503	+	--++-++-+--+-+-+++++++---	0.0049	0.0052
304693	rs11161521	t	c	92503	0.666	0.5056	+	+++---+++--++-+-++++---?-	0.0026	0.0057
304694	rs11161525	a	c	95454	-0.912	0.3619	-	++--+-++-++-+---------+++	-0.0051	0.0052
304695	rs11161526	t	c	95425	1	0.3171	+	--++-+--+--+++++++++++---	0.0056	0.0052
304696	rs1116153	a	g	93999	0.295	0.7678	+	++--+++++-+---+---+++---+	-3e-04	0.0074
304697	rs11161532	t	c	95454	-0.826	0.4087	-	---+--+-+++-+++--+++---+-	-0.0048	0.0057
304698	rs11161533	t	g	92468	0.028	0.978	+	+-+++---+++++++----+---?-	-0.001	0.0097
304699	rs11161539	t	c	95454	-0.079	0.9369	-	-+-++++++---------+-++++-	1e-04	0.0055
304700	rs11161543	a	g	95454	0.46	0.6453	+	-+---++--+-+++++++-+--++-	0.0036	0.0064
304701	rs11161548	a	g	95452	-0.373	0.7093	-	-++-+-+-++++-----++--+-++	-0.0012	0.0058
304702	rs11161551	a	c	95454	0.226	0.8215	+	----++-+--++-++-+--+---+-	0.0022	0.0058
304703	rs11161557	t	g	95438	1.986	0.04699	+	-+---+---+++-++-++++-+-++	0.0182	0.0097
304704	rs11161558	t	c	95454	1.328	0.1842	+	-+---+---+++-++-++++---++	0.0119	0.0098
304705	rs11161560	a	g	95208	1.781	0.07488	+	-+---+---+++-++-++++---++	0.0161	0.0098
304706	rs11161561	t	c	95425	-0.064	0.9493	-	-----+++--++--+--+-+++++-	5e-04	0.0054
304707	rs11161562	c	g	95454	0.555	0.5789	+	--+-++++--+++-++++-+-+++-	0.0063	0.0058
304708	rs11161563	t	c	92312	1.441	0.1497	+	-++--+---+++-++?++++-+-++	0.0187	0.0121
304709	rs11161564	t	c	95454	0.008	0.9932	+	+--+---+---+-+--++-++-+--	3e-04	0.0086
304710	rs11161566	a	t	92372	-1.756	0.07915	-	+-+---+++-+-+-+?----+-+--	-0.0207	0.01
304711	rs11161568	t	g	1125	-2.174	0.02971	-	?????????????????-???????	-0.507	0.2323
304712	rs11161570	t	c	95454	-1.244	0.2135	-	++-++--++----+----+++----	-0.0077	0.0052
304713	rs11161572	a	t	92372	-1.266	0.2057	-	+--++-+++-+-+--?----+++--	-0.0168	0.0122
304714	rs11161573	a	g	95454	0.079	0.9368	+	+-----+--++-++++-+--++++-	4e-04	0.0057
304715	rs11161574	t	c	95454	-1.076	0.2821	-	---+++-++----------++-++-	-0.005	0.0064
304716	rs11161581	a	g	95454	0.483	0.6294	+	--+-++--+++++-++---+-++++	0.0052	0.0071
304717	rs11161585	c	g	95394	-0.88	0.3786	-	---+--+--+--+-+--+--+++++	-0.0039	0.0056
304718	rs11161586	t	c	95454	1.352	0.1763	+	-+++++-++-++-+-++-++-----	0.007	0.0057
304719	rs11161587	c	g	95454	0.383	0.7019	+	-+++-----+---+-+-+++-++--	0.0021	0.0118
304720	rs11161588	a	g	95454	-1.126	0.2602	-	+-----+--+--+++--+--+++++	-0.0059	0.0057
304721	rs11161590	a	g	95454	0.481	0.6306	+	-++++---+--+-+-+--++-----	0.0017	0.0053
304722	rs11161592	a	c	95454	-1.367	0.1716	-	+-----+--+--+-+--+--+++++	-0.0071	0.0057
304723	rs11161595	a	t	93615	-0.638	0.5236	-	++++--+-++---+?+++-++++-+	-0.0078	0.0128
304724	rs11161598	a	g	95454	0.625	0.5319	+	--+++-----+--+-++-++-+++-	0.0041	0.0054
304725	rs11161599	a	g	8782	-0.553	0.5806	-	?????????????-??????+????	-0.0114	0.02
304726	rs11161602	t	c	95454	0.376	0.7066	+	+-----++-+-+-++--++-+----	0.0013	0.0059
304727	rs11161604	t	c	90533	1.129	0.2587	+	+---++++--+++-??--+----+-	0.0122	0.0128
304728	rs11161606	t	c	92503	-0.261	0.7944	-	+-+---+-+++++-+--+---++?+	-0.001	0.0054
304729	rs11161607	t	c	95454	-0.088	0.9301	-	+-----+-+++++-+--+---++-+	0	0.0054
304730	rs11161611	a	c	92503	0.084	0.9327	+	+-----+-+++++-+--+---++?+	8e-04	0.0054
304731	rs11161614	t	g	95412	-0.167	0.8672	-	-----++--+++-++---+++++++	-3e-04	0.0063
304732	rs11161615	a	g	92479	1.206	0.228	+	++-++--++--++--++++++--?-	0.0058	0.0058
304733	rs11161616	t	c	95450	0.93	0.3523	+	+++++--++---++-++++++----	0.0049	0.0062
304734	rs11161617	t	c	95433	-1.078	0.2809	-	--+--++--+++--+------++++	-0.006	0.0062
304735	rs11161618	t	c	92422	-1.143	0.2531	-	++-+--+-+---+-++++--++-?-	-0.0064	0.0053
304736	rs11161620	a	g	92497	-0.392	0.6949	-	---++----++-++-------++?-	-0.0015	0.0059
304737	rs11161622	t	c	95454	0.653	0.5135	+	------++-+-+-+---+++++-++	0.0036	0.0054
304738	rs11161623	a	g	95412	-0.784	0.4333	-	++++++--+-+-+-+++-----+--	-0.0047	0.0055
304739	rs1116163	a	g	95355	0.143	0.8865	+	++-+--+++++-+--+++-++++++	0.0012	0.007
304740	rs11161635	t	c	95454	1.499	0.1339	+	+-++-++-+++-++++-++++++-+	0.0084	0.0064
304741	rs11161636	a	g	95402	-1.88	0.0601	-	-+-++-----------+------+-	-0.0087	0.006
304742	rs11161637	a	g	95449	0.414	0.679	+	++-++-+-+--+++-+++--+-+-+	0.0019	0.0053
304743	rs11161638	t	g	8135	1.032	0.3019	+	?????????????+??????-????	0.0234	0.023
304744	rs11161640	t	c	86372	1.196	0.2316	+	++--++++++-+-+??+-?+-++++	0.0202	0.0184
304745	rs11161642	c	g	87086	1.316	0.1882	+	++--++++++-+-+-?+??+-++++	0.0227	0.0175
304746	rs11161643	t	c	95454	0.459	0.646	+	+-++-+-++++++-----+-+++--	0.0016	0.0052
304747	rs11161644	t	c	87121	0.744	0.4567	+	++--++++++-+-+--+??+-++?+	0.0136	0.0178
304748	rs11161645	t	c	95454	1.275	0.2025	+	++++-+-++-+++-++-----+++-	0.0069	0.0056
304749	rs11161647	a	g	38680	-0.314	0.7532	-	?--?+----+??++??----??++?	-0.0032	0.0089
304750	rs11161649	a	c	95454	-0.884	0.3768	-	+-----+--+---++-+++++-+-+	-0.0053	0.0053
304751	rs11161651	a	g	95454	-0.36	0.719	-	-++++-+--+-+-++--++++-++-	-0.0022	0.0052
304752	rs11161652	a	g	86372	1.084	0.2785	+	++--++++---+++??++?+-++++	0.0177	0.0168
304753	rs11161656	a	g	95454	-0.412	0.6805	-	-++++-+--+-+-++--++++-++-	-0.0024	0.0052
304754	rs11161657	a	c	95454	0.506	0.6129	+	+----+-++-+++--++-+-++---	0.0018	0.0052
304755	rs11161659	t	c	95454	-0.401	0.6882	-	-++++-+--+-+-++--++++-++-	-0.0023	0.0052
304756	rs11161662	a	g	95454	-0.956	0.3391	-	+--------+---++-+++++-+-+	-0.0058	0.0053
304757	rs11161663	a	c	95454	-0.413	0.6799	-	-++++-+--+---++--+-+--+++	-0.0013	0.0052
304758	rs11161664	t	c	92503	0.537	0.5912	+	+----+-++-+-+--++----+-?+	0.003	0.0052
304759	rs11161665	t	c	95454	-0.401	0.6881	-	-++++-+--+---++--+-+--+++	-0.0012	0.0052
304760	rs11161674	t	c	85539	0.173	0.8627	+	-+-+?-++-++-+-+?----++---	0.006	0.0163
304761	rs11161676	a	t	95454	0.953	0.3408	+	+-+-++--++++-++--+++-+---	0.0041	0.0053
304762	rs11161677	t	c	95454	-0.964	0.3348	-	---+--++----++-++---+-+++	-0.0042	0.0053
304763	rs11161686	t	c	95454	-1.168	0.2428	-	---+--++----++-++---+-+++	-0.0054	0.0053
304764	rs11161687	t	c	95454	1.098	0.2724	+	+++-++--++++--+--+-+-+---	0.0052	0.0052
304765	rs11161689	t	c	95454	-0.076	0.9395	-	-+-+-++++---+++++----+---	1e-04	0.006
304766	rs11161691	a	g	92498	0.119	0.9054	+	+-+-+----+++-----++++-+?+	1e-04	0.0062
304767	rs11161693	t	c	95454	0.094	0.9253	+	---+--+-+--+++--+-+-+-+++	-1e-04	0.0052
304768	rs11161695	t	g	95437	-0.044	0.9648	-	+++-++---++---++-+-+-+---	6e-04	0.0052
304769	rs11161696	t	g	95307	-1.681	0.09286	-	-+-++-++-++----++----+--+	-0.009	0.007
304770	rs11161697	a	g	95454	1.433	0.152	+	+-++-+--+--+-++--++++-++-	0.0076	0.0069
304771	rs11161698	a	g	95454	-0.068	0.9454	-	-+-+-++++---+++++----+---	2e-04	0.006
304772	rs11161710	a	t	95387	-0.662	0.5079	-	+++--++++-+---++++-+-+---	-0.0023	0.0057
304773	rs11161711	t	c	92503	-0.477	0.6337	-	+++--++++-+---++++-+-+-?-	-0.0013	0.0057
304774	rs11161712	a	g	85670	-0.488	0.6259	-	----?+--++++---+--++---?+	-0.0139	0.0186
304775	rs11161713	a	g	95340	-1.126	0.26	-	+-+--++++-+-+-++--+--+---	-0.0073	0.0057
304776	rs11161714	t	c	1839	-0.765	0.4442	-	??????????????-??????????	-0.0355	0.0462
304777	rs11161717	a	g	95454	-0.585	0.5586	-	+-+--++++++-++-+--+----+-	-0.0041	0.0054
304778	rs11161721	a	c	95454	-1.206	0.2277	-	+-+-+--+----++++-----+---	-0.0067	0.0057
304779	rs11161725	a	c	1317	-0.215	0.8294	-	?????????????????????-???	-0.0328	0.1514
304780	rs11161729	a	g	95417	-1.75	0.0802	-	+-+-+--+-+--++++-----+---	-0.0103	0.0056
304781	rs1116173	a	g	95446	0.471	0.6377	+	-+--++-+---+++---+----+-+	0.0033	0.0063
304782	rs11161731	t	c	95454	0.286	0.7752	+	+-+---+-++-+-+++-+--+----	9e-04	0.0056
304783	rs11161732	a	g	95440	-1.534	0.125	-	+-+-+--+-+--++++-----+---	-0.0081	0.0056
304784	rs11161734	c	g	10119	-0.642	0.5208	-	?????????????-??????+-???	-0.0085	0.0179
304785	rs11161735	t	c	10089	1.349	0.1774	+	?????????????+??????++???	0.0268	0.0178
304786	rs11161736	t	c	95454	0.635	0.5253	+	---+++-+++++-+----+--++++	0.0044	0.0071
304787	rs11161738	t	c	95454	-0.896	0.3702	-	-+----+---+-+-+--+-++----	-0.0056	0.0067
304788	rs11161741	a	g	92503	0.929	0.3531	+	+-++++-+++-+-+-++-+--++?+	0.006	0.0068
304789	rs11161742	t	c	95454	0.728	0.4667	+	---+++-+++++-+----+--+-++	0.0051	0.0071
304790	rs11161743	a	g	95454	-1.002	0.3161	-	++----+---+-+-+--+-++----	-0.0066	0.0067
304791	rs11161744	a	t	95454	-1.022	0.3066	-	++----+---+-+-+--+-++----	-0.0068	0.0067
304792	rs11161745	t	c	95454	-1.028	0.3039	-	++----+---+-+-+--+-++----	-0.0066	0.0067
304793	rs11161746	a	g	95453	0.706	0.4801	+	---+++-+++++-+----+--++++	0.0049	0.007
304794	rs11161747	a	g	95454	1.62	0.1052	+	+-+-++-+++++-+++--+--++++	0.0084	0.0058
304795	rs11161750	a	g	95426	0.235	0.8139	+	+-+-++-++++--+----+0-+-+-	2e-04	0.0052
304796	rs11161752	t	c	92503	0.861	0.3894	+	+++-+++-+++++-++---+-++?-	0.0072	0.0095
304797	rs11161755	a	g	92503	1.129	0.2588	+	+++-+++-+++++-++---+-++?-	0.0094	0.0095
304798	rs11161756	t	c	92503	1.049	0.2943	+	+++-+++-+++++-++---+-++?-	0.0088	0.0096
304799	rs11161757	t	g	92503	1.044	0.2963	+	+++-+++-+++++-++---+-++?-	0.0089	0.0096
304800	rs11161758	a	c	92503	1.722	0.08503	+	+++-+++-++++++++---+-++?-	0.015	0.0091
304801	rs11161759	t	c	92503	1.054	0.2919	+	+++-+++-+++++-++---+-++?-	0.009	0.0097
304802	rs1116176	a	g	88342	1.202	0.2293	+	+---++++++-+-+-+-+?+--+?+	0.0192	0.0168
304803	rs11161770	a	g	92207	-1.462	0.1437	-	--+--+-+??--++-----+-+--+	-0.0086	0.0059
304804	rs11161771	a	g	95454	0.698	0.4853	+	++++--+---++--+-+++-+--++	0.0039	0.0057
304805	rs11161784	t	c	95417	0.624	0.5325	+	-+--++--+++-++++----+++++	0.0041	0.0053
304806	rs11161788	a	c	95454	-0.112	0.9106	-	--+++-+----+-++-++-+++--+	6e-04	0.0104
304807	rs1116179	a	g	94704	0.418	0.676	+	++-+---+++-++++-+--+--+-?	0.0016	0.0051
304808	rs1116180	a	t	95454	-0.059	0.953	-	+---+--++-+--+++++--+-+--	-5e-04	0.0078
304809	rs11161811	t	c	95454	-0.114	0.909	-	++-+-+-+-----+--++--+-++-	-0.0012	0.0054
304810	rs11161812	a	g	32894	0.724	0.4688	+	+??-??????+??+?-????++??-	0.002	0.0096
304811	rs11161815	a	c	95452	-0.829	0.4074	-	++-+-+-++-------++--+-++-	-0.0047	0.0057
304812	rs11161816	t	c	95454	0.021	0.9834	+	+++--+-+--++-+--+---++-+-	-0.0016	0.0055
304813	rs11161828	a	g	92372	-2.133	0.0329	-	+--++---+++-+--?-+--+-+-+	-0.0232	0.0104
304814	rs11161830	t	c	92372	2.065	0.03893	+	-++--+++---+-++?+-++-+-+-	0.0227	0.0106
304815	rs11161831	a	t	95454	-0.978	0.3282	-	+----+----+--+------+-++-	-0.0072	0.0057
304816	rs11161832	a	g	92372	-1.869	0.06166	-	+--++---+++-+--?-+----+-+	-0.0212	0.0105
304817	rs11161833	a	g	95454	-1.1	0.2714	-	+--++----++-++-++-----+-+	-0.0127	0.0082
304818	rs11161835	c	g	95454	1.67	0.09487	+	-++--+++---+-++-+-++++-+-	0.02	0.0106
304819	rs11161836	t	c	95454	-0.072	0.9422	-	-+-+-----++-++-------++++	3e-04	0.006
304820	rs11161838	t	c	38667	-0.887	0.3748	-	?--?-+----??-+??-+--??--?	-0.0064	0.0079
304821	rs11161843	a	g	95454	-0.804	0.4216	-	+-+++---++--+---+++---+--	-0.006	0.006
304822	rs11161846	a	g	94704	-0.526	0.5991	-	------+--+--+++-++--++++?	-0.0047	0.0087
304823	rs11161848	a	g	95454	-1.538	0.1241	-	+---++--++---+----+------	-0.0092	0.0056
304824	rs1116185	t	c	93999	-1.924	0.05433	-	-++--+--+------+-+---++--	-0.0144	0.008
304825	rs11161851	t	c	95452	-1.18	0.238	-	--++--+---+++-+-++-+-----	-0.0061	0.0053
304826	rs11161852	a	g	95454	0.105	0.9166	+	+-+-+-+-++-+-+++-+--++---	5e-04	0.0055
304827	rs11161857	c	g	95454	-0.213	0.8314	-	-+-+-----++-++-------++++	-7e-04	0.006
304828	rs11161858	t	c	92330	-0.693	0.4883	-	------+-++--+++-++--+++?+	-0.0058	0.0082
304829	rs11161862	t	g	95454	1.386	0.1658	+	-++++++-+++----++-++++-+-	0.0097	0.0064
304830	rs11161864	a	c	95454	-0.813	0.416	-	------+-++--+++-++--+++++	-0.0071	0.0083
304831	rs11161871	a	c	92352	-0.85	0.3954	-	------+--+--+++-++--+++?+	-0.0076	0.0083
304832	rs11161872	a	g	86503	-0.393	0.6943	-	---+--+---+--+?+--?+-++?-	-0.0083	0.0166
304833	rs11161876	t	c	1296	-0.534	0.5935	-	?????????????????????-???	-0.0994	0.1852
304834	rs1116188	c	g	92503	-1.332	0.1829	-	--+--++-+-+-+-++--++-++?+	-0.021	0.0176
304835	rs11161887	a	g	95454	0.607	0.5436	+	++++-++++--++-+-++++-+-++	0.0029	0.0052
304836	rs1116189	t	g	95377	1.727	0.0842	+	-+-++++--+-+++++++--+--++	0.0115	0.0054
304837	rs11161898	t	g	95454	-2.058	0.03961	-	---+-+--+-+-+---++---++-+	-0.0191	0.0107
304838	rs11161912	t	c	95454	1.17	0.2418	+	---+--++--++++--+--++++++	0.0071	0.0052
304839	rs11161914	a	t	95454	-0.251	0.802	-	--+-++-----+-++----+----+	-0.001	0.0064
304840	rs11161915	t	g	86503	0.361	0.7184	+	+++-++-+++-++-?-++?-+--?+	0.0076	0.0165
304841	rs11161926	a	g	63943	-0.007	0.9947	-	?+-?+??+-??-?+??+-?+?--++	0.0044	0.0258
304842	rs11161927	a	g	63943	0.089	0.9289	+	?-+?-??-+??+?-??-+?-?++--	-0.0025	0.0254
304843	rs11161928	a	g	95454	-1.695	0.09016	-	-+-+-+--+-+-+---++---++-+	-0.0152	0.0107
304844	rs11161930	a	g	95454	-0.193	0.8472	-	--+-++-----+--+---++----+	-1e-04	0.0066
304845	rs11161932	t	c	95454	1.497	0.1344	+	+-+-+-++-+-+-+++--+++--+-	0.0133	0.0106
304846	rs11161934	a	t	69881	0.216	0.8291	+	??++-??-+?-+?-??-+--?++--	0.0014	0.0264
304847	rs11161935	a	g	95454	0.043	0.9657	+	++-+--+-+-+-+-++--+---+-+	4e-04	0.0053
304848	rs11161938	t	c	95454	0.436	0.6625	+	+-+++++-++--+----+++++-++	0.0024	0.0078
304849	rs11161939	a	g	92503	-0.277	0.7814	-	+++---+---+--+++---+--+?+	-0.001	0.0093
304850	rs1116194	a	g	93999	-0.312	0.7554	-	++++++-+-+-+---++++----++	-0.0025	0.0065
304851	rs11161940	a	g	95454	0.23	0.818	+	+-+++++-++--+----+++++-++	6e-04	0.0078
304852	rs11161941	t	c	87724	-0.545	0.5854	-	-?-----+--++-++++-----+--	-0.0035	0.0083
304853	rs11161943	t	c	60770	-1.746	0.08082	-	--??++?????-?+-?+-?-??-?+	-0.0133	0.0117
304854	rs11161944	t	c	51247	-1.229	0.219	-	-???++?????-?+-?+-????-?+	-0.0087	0.0119
304855	rs11161946	t	c	85411	0.39	0.6962	+	--++-+---+-++-?--++--+-?+	0.0136	0.0207
304856	rs11161948	a	g	95454	-0.29	0.7719	-	+-+------+++++-++-+---+--	-0.0027	0.0054
304857	rs1116195	a	t	93999	-1.092	0.2746	-	++---+----+++-+--++-----+	-0.0062	0.0055
304858	rs11161950	t	c	95454	-0.239	0.8113	-	--+------+-++--++-+--+++-	-0.0027	0.0072
304859	rs11161958	c	g	10065	-0.322	0.7478	-	?????????????+??????--???	-0.0058	0.017
304860	rs11161959	t	g	95454	-1.004	0.3156	-	--+--++---++++----+---+--	-0.0053	0.0054
304861	rs11161960	a	g	95454	-0.959	0.3373	-	--+--++---+-++----+---+--	-0.0053	0.0056
304862	rs11161961	a	t	95454	0.959	0.3374	+	++-++--+++----++++-+++-++	0.0051	0.0054
304863	rs11161962	a	c	95454	-0.973	0.3303	-	--+--++---+-++----+---+--	-0.005	0.0054
304864	rs11161963	t	c	95454	0.935	0.35	+	++-++--+++-+--++++-+++-++	0.0048	0.0054
304865	rs11161964	t	c	95454	-0.914	0.3605	-	--+--++---++++----+---+--	-0.0048	0.0054
304866	rs11161967	t	c	95454	0.398	0.6905	+	++-++++++-+---+--+-+++--+	0.0039	0.0072
304867	rs11161968	a	g	95454	0.646	0.5185	+	-+-+++++++++-+---+-----+-	0.0072	0.0079
304868	rs11161970	c	g	95454	-0.213	0.8311	-	-+---++++-+---+-++++++--+	-6e-04	0.0053
304869	rs11161973	t	c	95421	-0.147	0.8833	-	-++--++---++---+--++-++--	-2e-04	0.0052
304870	rs11161975	t	g	95454	-0.165	0.8689	-	-++--++---++---+--++-++--	-2e-04	0.0052
304871	rs11161976	t	c	95454	-0.026	0.9795	-	+-++--+--+++++-++----+++-	-5e-04	0.0073
304872	rs11161977	a	c	92503	-0.641	0.5215	-	----++-+++---++--++++--?+	-0.0042	0.0067
304873	rs11161978	t	c	86488	-0.297	0.7665	-	---+--+---+--+?+--?+-++?-	-0.0078	0.0164
304874	rs1116198	t	c	95454	-0.812	0.4167	-	--++++---+------+-+-++-++	-0.0053	0.0055
304875	rs11161987	a	g	93807	1.28	0.2006	+	+++--+++--+-?+-++---+-+-+	0.0154	0.0108
304876	rs11161990	a	t	95454	-0.004	0.9968	-	++-+-+++----+---------+++	-7e-04	0.0102
304877	rs11161991	a	g	95279	-0.846	0.3976	-	+-++-+--+-+--++-+--++-+-+	-0.0073	0.0083
304878	rs11161992	t	c	92396	-0.66	0.5092	-	+---+--++-----++--+++--?-	-0.0057	0.0064
304879	rs11161993	a	g	95443	0.678	0.498	+	++++-++--+++++--+--+--+++	0.0041	0.0056
304880	rs11161995	a	g	95454	-0.011	0.9916	-	++++-++-+++-----+--++-+-+	3e-04	0.006
304881	rs11161996	t	c	95454	-0.354	0.7231	-	----+--+---++-++-++-++-+-	-0.0025	0.0056
304882	rs11161997	t	c	95447	0.12	0.9043	+	+---+--+---++-++-++-++-+-	2e-04	0.0059
304883	rs11161998	a	g	95452	-1.004	0.3152	-	---+++-++-----+++---+----	-0.0096	0.0105
304884	rs11161999	a	g	92481	0.881	0.3783	+	+++---+-+++++++--+++-++?+	0.0088	0.0107
304885	rs11162001	t	c	95454	-0.431	0.6666	-	-+++--+--++----++-------+	-5e-04	0.0071
304886	rs11162002	t	g	95454	0.364	0.7161	+	+---++-+++-++++--+++++++-	3e-04	0.0071
304887	rs11162003	c	g	83421	0.645	0.5188	+	+++-++-+++-++-??++?-+--?+	0.0111	0.0165
304888	rs11162004	t	c	95454	0.374	0.7082	+	+---+--++--++++--+++++++-	2e-04	0.0072
304889	rs11162007	t	c	95454	-0.448	0.654	-	-+++-++--++----+++------+	-6e-04	0.0071
304890	rs11162009	t	c	95454	-0.442	0.6587	-	-+++-++--++----+++------+	-1e-04	0.0073
304891	rs1116201	a	g	7776	0.304	0.7611	+	?????????????+???????????	0.0058	0.019
304892	rs11162010	a	g	95454	0.522	0.6016	+	+---+--++--++++---++++++-	7e-04	0.0073
304893	rs11162011	a	g	95439	0.26	0.7948	+	+---+--++--++++---++++++-	-0.0011	0.0075
304894	rs11162015	c	g	95402	-0.915	0.3601	-	-++---+-+--+----+-+-++---	-0.0038	0.0052
304895	rs11162019	t	c	95454	-1.543	0.1228	-	------+-+--++---++++++-+-	-0.0089	0.0067
304896	rs11162021	t	c	95454	0.542	0.588	+	+-+-+--+-++-++-+---+-++++	0.0018	0.0052
304897	rs11162023	a	c	95454	0.452	0.6513	+	+-+-+--+-++-++-----+-++++	0.0013	0.0052
304898	rs11162028	t	g	95454	-0.604	0.5456	-	-+-+-++-+-++--+++++-+----	-0.0021	0.0053
304899	rs11162029	a	g	95454	0.846	0.3976	+	+---+++--++-++----++-++-+	0.0049	0.0066
304900	rs11162035	t	c	92503	1.166	0.2435	+	++++---+++++++--+---+--?-	0.0074	0.0059
304901	rs11162036	a	g	95454	-1.618	0.1057	-	----+++-------++-+++-+--+	-0.0098	0.0059
304902	rs11162037	a	g	92503	-1.212	0.2253	-	----+++-------++-+++-++?+	-0.008	0.0059
304903	rs11162039	t	g	92479	-1.239	0.2155	-	----+++-------++-+++--+?+	-0.0082	0.006
304904	rs11162043	t	c	95350	-0.689	0.4911	-	+-+-+--+-+--++--++--++++-	-0.0066	0.0078
304905	rs11162047	c	g	81807	-0.393	0.6941	-	---+--+---+-?+??--?+-++?-	-0.0074	0.0157
304906	rs11162048	t	c	83411	-0.628	0.5298	-	---+--+---+--+??--?+-++?-	-0.0107	0.0166
304907	rs1116205	a	g	93999	1.042	0.2972	+	--+--+++++--++-+++++-+++-	0.0059	0.0054
304908	rs11162051	t	c	68283	0.511	0.6096	+	-?-?+-+-+-+-+++?-+?+--+++	0.0124	0.0246
304909	rs11162052	c	g	95423	0.906	0.365	+	-+-+--+---+-+++++-+++-+-+	0.0057	0.0053
304910	rs11162056	a	g	95454	0.681	0.4959	+	--++-+-+-+++---+---++-+--	0.0068	0.0075
304911	rs11162058	t	c	95454	-1.555	0.1201	-	++-----+++-------+---+-++	-0.0096	0.0052
304912	rs11162059	t	g	95454	-1.457	0.1451	-	++-+--++++-------+-----++	-0.0109	0.0059
304913	rs11162061	t	c	95454	0.055	0.9559	+	-+-++-+--+--+++++-+-+-+-+	-2e-04	0.0076
304914	rs11162062	t	c	95422	1.06	0.2891	+	--+--+-+-++++--+--+++----	0.0086	0.0068
304915	rs11162065	t	c	85260	0.604	0.546	+	++--++-+++-++-+?++?-+--?+	0.011	0.017
304916	rs11162066	t	g	92372	1.052	0.2927	+	--++-+++-+++-++?--++-+++-	0.0091	0.0083
304917	rs11162068	t	c	95387	-1.394	0.1633	-	+-+++---++--+---+---+----	-0.0083	0.0058
304918	rs11162069	a	t	92491	-0.298	0.7654	-	-+-++-+-+---+-++----+--?+	-0.0017	0.0066
304919	rs11162070	t	c	95454	0.705	0.4808	+	-++--+-+--+++-+---+-+++++	0.0039	0.0057
304920	rs11162072	t	c	10117	0.757	0.449	+	?????????????+??????+-???	0.0125	0.0172
304921	rs11162073	t	c	95454	0.868	0.3851	+	-++--+-+--+++-+---+-+++++	0.0047	0.0057
304922	rs11162075	t	c	95400	0.612	0.5407	+	-+--++-+++-----+-++-+++++	0.0036	0.0053
304923	rs11162078	t	c	95454	0.94	0.347	+	-+---++---++-+++-+++-++++	0.0052	0.0057
304924	rs11162081	a	g	95454	0.617	0.5374	+	-+--++-+++-----+--+-+++++	0.0037	0.0053
304925	rs11162083	a	t	95454	0.567	0.571	+	-++-++-++++-----+--+++-+-	0.0035	0.0056
304926	rs11162084	a	g	95454	-0.415	0.6779	-	+--+--+----+++++-++---+-+	-0.0026	0.0056
304927	rs11162086	t	c	95454	-0.145	0.8845	-	+----+++++++--++++---++-+	-0.0019	0.006
304928	rs11162087	a	g	95451	0.733	0.4635	+	+---+--+-++-+++++++--++-+	0.0024	0.0054
304929	rs11162089	a	c	95454	1.096	0.2729	+	+-++--+-+---++++-++-++---	0.0083	0.0077
304930	rs11162090	a	c	95405	-0.24	0.8101	-	+-+-++-+-+-+-+--++++-+---	-0.0024	0.0055
304931	rs11162091	t	c	95435	0.558	0.5771	+	-+++++------+-++---++-+++	0.0038	0.0053
304932	rs11162092	c	g	95454	-0.425	0.6711	-	+-----++++++-+--+++--+--+	-0.0034	0.0053
304933	rs11162094	a	g	95454	-1.251	0.2108	-	-------+++++----+--+-++-+	-0.0082	0.0064
304934	rs11162095	a	g	95428	0.487	0.6262	+	-+++++--+---+-++---++-++-	0.0037	0.0052
304935	rs11162096	t	c	95436	0.492	0.623	+	-+++++--+---+-++----+-++-	0.0038	0.0052
304936	rs1116210	c	g	95454	1.557	0.1194	+	+-+-+--+++++++++--+++++-+	0.008	0.0052
304937	rs11162101	t	c	95454	0.491	0.6234	+	++--++--+++-+++----+--+++	0.0043	0.008
304938	rs11162102	a	g	95454	0.198	0.843	+	+++-++---++--+-+---+-+-++	0.0013	0.0068
304939	rs11162104	a	c	95454	-0.049	0.9607	-	+-+-+-+-+-+-++++++-+-+--+	-0.0011	0.0073
304940	rs11162113	t	c	91293	-0.817	0.4137	-	-+-+-+-+-+-+------?-+-++-	-0.0043	0.007
304941	rs11162118	c	g	95454	-0.474	0.6355	-	+---+-+++-+-+-++++--++--+	-0.0031	0.0065
304942	rs11162121	a	g	95452	0.738	0.4604	+	--+++++++-+-++++---++++-+	0.0049	0.0052
304943	rs11162125	a	g	95454	0.109	0.9134	+	+------+-+-+-+--+++-++-++	-0.0014	0.0082
304944	rs11162127	t	c	95454	-0.163	0.8705	-	---+-+-+--++---+++++--+--	-0.0014	0.0058
304945	rs11162128	t	c	95454	0.378	0.7053	+	-++-+--+++-+----+-+--++++	0.0017	0.0057
304946	rs11162130	a	g	95449	-0.008	0.9937	-	+++---+-++--+++-+---++-++	5e-04	0.0059
304947	rs11162132	t	c	76430	-0.558	0.577	-	+-+-?+----+--+??-+?+-+-?-	-0.0166	0.0213
304948	rs11162133	a	g	95435	-0.536	0.5919	-	-+---+-++---+++----++++-+	-0.0022	0.0062
304949	rs11162135	a	g	95454	-0.174	0.8621	-	-+-----+++-++---+++----++	-6e-04	0.0068
304950	rs11162136	t	c	95454	-0.002	0.9984	-	-+-----+++-+----+++-++-++	0.0012	0.0066
304951	rs11162138	t	g	95454	-0.105	0.9162	-	+-+++++---+-+-++---+--+--	-0.0017	0.0065
304952	rs11162139	t	c	95380	0.055	0.9564	+	+-+++++---+-+-++---+-++--	-6e-04	0.0065
304953	rs11162144	a	g	95454	0.402	0.6875	+	+-++-++---+-++++--+++-+--	0.002	0.0069
304954	rs11162148	t	c	95454	0.005	0.9962	+	+-++-++------+++-+--+++--	-0.0018	0.0076
304955	rs11162149	a	c	95454	-0.649	0.5166	-	--+---++---+---++++-+++--	-0.0039	0.0063
304956	rs11162150	a	c	95454	0.37	0.7111	+	+-++-++---+-+-++-++--++-+	0.0031	0.0083
304957	rs11162157	a	g	95454	0.529	0.5966	+	+-+-+-+-+-+-+++++--+-++++	0.0038	0.007
304958	rs11162158	a	g	95454	0.238	0.812	+	+-+-+-+-+-+-+-++++-+-++++	0.0018	0.0068
304959	rs11162159	t	c	95454	0.441	0.6589	+	+-+-+-+-+++-+++++--+-++++	0.0033	0.0071
304960	rs11162161	t	c	95454	-0.109	0.9133	-	---+--+++--++-+--++-+-+--	-6e-04	0.0068
304961	rs11162164	t	g	95454	0.208	0.8351	+	+--++-+-+++-++-++--+-++-+	0.0021	0.0076
304962	rs11162165	a	g	95454	0.081	0.9357	+	-+---+-+-+-+--+--++-+-++-	-3e-04	0.0071
304963	rs11162170	a	g	93484	-0.785	0.4325	-	++++-+++++-+------+-+?--+	-0.0103	0.0142
304964	rs11162180	a	g	95454	-0.212	0.8325	-	+----+-+++++-----++-++-++	-0.0015	0.0053
304965	rs11162182	c	g	95454	1.581	0.1139	+	-+--++++--++-+-+--+--+++-	0.0142	0.0083
304966	rs11162183	a	g	95454	1.373	0.1696	+	++++---++---+++++-+--++--	0.0063	0.0062
304967	rs11162186	a	g	95454	-1.736	0.0826	-	--+-++----+++-+-+++-++---	-0.0175	0.0108
304968	rs11162187	t	c	95454	1.821	0.06856	+	++-+---++--+-+-+---+-+++-	0.012	0.0078
304969	rs11162190	a	g	95425	-0.76	0.4475	-	--+---++---+---++++-+++--	-0.0046	0.0063
304970	rs11162192	a	g	95454	-0.316	0.752	-	++--++----+-+---+++++++++	-0.0026	0.006
304971	rs11162199	t	c	95418	0.571	0.5678	+	--+----++--+-+---+++-++-+	0.0062	0.0096
304972	rs11162202	a	g	95424	0.428	0.6685	+	+--++-+++-+--+---+------+	0.0025	0.0102
304973	rs11162205	t	c	95454	1.154	0.2486	+	+--++++++-+--+--+++---+-+	0.0074	0.0069
304974	rs1116221	t	c	95454	0.357	0.7208	+	++-++++-+--+---+-+---+-++	0.0016	0.0059
304975	rs11162211	a	g	95446	0.155	0.8767	+	++++--+-++-++------+--++-	9e-04	0.0075
304976	rs11162212	a	c	95439	-0.745	0.4566	-	-++------+-++++-----++--+	-0.0026	0.0055
304977	rs11162217	a	g	95454	0.928	0.3533	+	++--++--+-++++----++-+-+-	0.0044	0.0067
304978	rs11162219	a	g	95403	-0.493	0.6223	-	---+--++-+-----+++----+++	-0.0019	0.0073
304979	rs1116222	t	g	32894	-0.669	0.5038	-	-??-??????+??-?-????+-??-	-0.004	0.0107
304980	rs11162224	c	g	92503	0.46	0.6453	+	+++-++--+-+++++---++++-?-	0.0017	0.0074
304981	rs11162228	t	c	93840	-0.265	0.7909	-	---+--++-+--?--+++----+++	-2e-04	0.0081
304982	rs11162229	t	c	95362	0.644	0.5196	+	+++-++--+-+++++---++++---	0.0027	0.0074
304983	rs11162231	t	g	95341	-0.17	0.8651	-	-+-+--++++-----+++--+-+++	0.0013	0.0072
304984	rs11162233	t	c	95454	2.401	0.01634	+	--+-+++-+++++++-++-+---++	0.0133	0.0052
304985	rs11162234	a	g	95454	-0.664	0.5064	-	--+---++---+---++++-+++--	-0.0041	0.0063
304986	rs1116224	a	g	86628	-1.306	0.1916	-	?+?-?+++-+-+---?---++---+	-0.0254	0.0187
304987	rs11162245	a	c	95454	-1.772	0.07638	-	+--+-+------+--+--+++--+-	-0.0099	0.0054
304988	rs11162246	t	c	95454	1.663	0.09636	+	+-+-+--+++++-++--++++-+++	0.0107	0.0063
304989	rs11162247	a	g	95449	-1.519	0.1288	-	+--+--------+--+--+++--+-	-0.0085	0.0055
304990	rs11162250	a	g	95454	0.607	0.544	+	++-+++--+++-+++----+---++	0.0038	0.0063
304991	rs11162257	a	g	95454	-0.528	0.5975	-	--+---++---+---++++-+++--	-0.0031	0.0063
304992	rs11162258	t	c	95415	0.539	0.5901	+	++-+++--+++-+++----+---++	0.0032	0.0062
304993	rs11162259	t	c	95454	0.679	0.4971	+	++-+++--+++-+++----+---++	0.004	0.0063
304994	rs11162262	a	c	8772	-0.238	0.8118	-	?????????????-??????-????	-0.0115	0.0351
304995	rs11162263	a	g	95454	-0.194	0.8463	-	+--+--+++--++-+-+++-+-+--	-0.0014	0.0068
304996	rs11162266	a	c	95454	-1.457	0.1451	-	--++---+-+--+---+--++-+-+	-0.0123	0.0082
304997	rs11162269	a	g	95454	1.637	0.1017	+	++++-+++++-+---+--+-++---	0.0109	0.0073
304998	rs11162270	t	c	92500	1.794	0.07278	+	++++-+++++-+---+--+-++-?-	0.012	0.0074
304999	rs11162271	a	g	95454	1.214	0.2248	+	++++-+++---+---++++-++---	0.0068	0.0059
305000	rs11162281	c	g	95454	1.562	0.1183	+	++++-+++++-+---+--+-++---	0.0104	0.0073
305001	rs11162286	a	g	92331	0.201	0.8405	+	-+--++-+---+---+-++-++-?+	0.0019	0.0058
305002	rs11162293	a	g	95454	-1.395	0.1631	-	---+-+--++------+++--++--	-0.0081	0.0063
305003	rs11162297	a	g	95454	-1.754	0.07945	-	-+-----+----+-----++++---	-0.009	0.0053
305004	rs11162298	a	t	92372	-1.196	0.2317	-	+---+----+---++?++++++-+-	-0.0168	0.0104
305005	rs11162302	a	g	95454	0.709	0.4783	+	++-+++--+++-+++----+---++	0.0042	0.0063
305006	rs11162307	a	g	95302	1.99	0.04657	+	+++--+++--+++++--++-+--++	0.0128	0.0067
305007	rs11162308	t	c	33925	-1.259	0.208	-	??--???+?????-???-???-??+	-0.0256	0.023
305008	rs11162309	t	c	95454	-1.063	0.2879	-	--++-+--++--+--++++---+-+	-0.0051	0.0051
305009	rs11162315	a	c	95454	-0.742	0.4578	-	--+---++---+---++++-+++--	-0.0044	0.0063
305010	rs11162319	a	g	95454	1.425	0.1542	+	-+--+--+++++++-+++----+++	0.0173	0.0107
305011	rs11162323	t	c	95451	-0.692	0.4888	-	-+-++---++--+--+++---++--	-0.0028	0.0054
305012	rs11162324	a	g	95454	0.453	0.6506	+	-+-+++--++--++-+---+----+	0.0035	0.0072
305013	rs11162326	a	g	95454	0.238	0.8122	+	-+----+++--+---+++-++++--	0.0024	0.0064
305014	rs11162330	a	g	92496	-0.406	0.685	-	---+++++++---++---++---?+	-0.0023	0.0058
305015	rs11162331	a	g	95454	-0.362	0.7171	-	--+++-+--++-+-+-+-+-++++-	-0.001	0.0065
305016	rs11162333	a	g	95454	-0.349	0.7274	-	--+++-+--++-+-+-+-+-++++-	-8e-04	0.0066
305017	rs11162334	t	c	95454	0.04	0.9684	+	---+-+++-+-++-+---++---++	6e-04	0.0071
305018	rs1116234	a	c	93999	-0.52	0.6028	-	---+-+-+++---+--+-+++-++-	-0.0037	0.0059
305019	rs11162340	a	t	95454	-0.113	0.9099	-	+++--+-++--+++---++++-+--	-8e-04	0.0067
305020	rs11162341	t	c	95375	-0.114	0.9092	-	-++++---+--++-++---+-++++	0.0017	0.0082
305021	rs11162350	t	g	95454	-1.688	0.0914	-	----+++++--+-++---++-----	-0.0085	0.0052
305022	rs11162351	c	g	92430	-2.661	0.007802	-	----+++-+--------+++--+?-	-0.0149	0.0055
305023	rs11162355	t	g	95451	0.287	0.7739	+	-+-+--++---+--+--++++----	0.0021	0.0055
305024	rs11162359	a	g	95454	-1.029	0.3035	-	+-++--+---+-+-+-++--+-+--	-0.0055	0.0052
305025	rs11162360	t	c	95454	-0.774	0.4392	-	--+---++---+---++++-+++--	-0.0046	0.0063
305026	rs11162367	a	g	95454	0.507	0.612	+	-+--++----++++-+--++-++++	0.0038	0.007
305027	rs11162370	t	c	95454	-0.001	0.9993	-	-+-+-+---++++-++--+-+--+-	2e-04	0.0056
305028	rs11162377	a	t	95454	0.473	0.6362	+	++-+++--++--+++----+---++	0.0029	0.0063
305029	rs11162378	a	g	95454	0.058	0.9541	+	+-+-+-+++----+--++-+--+-+	0	0.0056
305030	rs1116238	t	c	94483	-0.46	0.6455	-	--+-++---+---+-+++--++---	-0.0037	0.0083
305031	rs11162380	a	c	92503	-0.564	0.5728	-	-+-+++---++++-++-++----?-	-0.0027	0.0058
305032	rs11162386	t	c	95454	0.634	0.5263	+	+-----+++----+--+--++++-+	0.003	0.0058
305033	rs11162387	t	c	95454	-0.301	0.7634	-	-+-+++---++++-++-++----+-	-8e-04	0.0064
305034	rs1116240	a	c	95454	1.276	0.202	+	++++---+-+-+--++-++++-+-+	0.0073	0.0062
305035	rs11162400	a	g	89421	0.084	0.933	+	+-+-+-++-+-+-+-?+---+++?+	-0.0023	0.0109
305036	rs11162405	a	g	95454	0.79	0.4295	+	+++++---+-+-+---+---+++++	0.0042	0.0052
305037	rs11162411	a	t	95454	-1.333	0.1827	-	----++-+-+-+--++-++----+-	-0.0071	0.0054
305038	rs11162413	a	t	94627	-0.738	0.4604	-	--+++----++++-+++-+-++-+?	-0.0057	0.0075
305039	rs11162415	a	g	95454	1.128	0.2593	+	++++--+++-+++--++--++++-+	0.0054	0.0053
305040	rs11162418	c	g	92476	1.179	0.2383	+	++++--+++-+-++--+-++--+?+	0.0053	0.0057
305041	rs11162423	a	c	95454	1.068	0.2856	+	++++--+++-+-++--+-++--+-+	0.0047	0.0056
305042	rs11162425	t	g	95454	-0.912	0.3619	-	----++---+---+++-++--+-+-	-0.0041	0.0053
305043	rs11162429	a	g	95454	-1.313	0.1891	-	--+-+-----+-+-++++-+++-+-	-0.0077	0.0066
305044	rs11162433	t	g	95454	-2.219	0.02645	-	----++---+----++-++++--0-	-0.0133	0.0064
305045	rs11162435	a	g	95454	2.689	0.007166	+	++++-++++-++++--+-----+-+	0.014	0.0056
305046	rs11162436	t	c	95454	-2.574	0.01005	-	----+----+----++-+++++-+-	-0.0134	0.0057
305047	rs11162437	a	g	10061	-0.858	0.3911	-	?????????????-??????++???	-0.0124	0.0171
305048	rs1116244	t	g	7776	0.754	0.4507	+	?????????????+???????????	0.0676	0.0892
305049	rs11162442	a	g	95454	1.57	0.1164	+	-+++-+++++++++-+-+-+-+++-	0.0101	0.0057
305050	rs11162444	t	g	95454	1.197	0.2312	+	++-+--++++---++-+--+-++++	0.0067	0.0058
305051	rs11162445	a	g	95454	-1.153	0.249	-	--+-++----+++--+-++-+----	-0.0065	0.0058
305052	rs1116245	a	g	95446	-0.563	0.5732	-	+--+-----+-+--+-----+++++	-0.0036	0.0053
305053	rs11162451	a	c	95454	-0.836	0.4032	-	+-++-+-+-----+-+++--+-+--	-0.0064	0.0075
305054	rs11162453	t	c	92355	-0.421	0.6738	-	--+-+-++--++----++-+-++?+	-0.0022	0.0063
305055	rs11162456	a	g	7776	-1.301	0.1932	-	?????????????-???????????	-0.0269	0.0205
305056	rs1116246	a	g	94696	0.944	0.3452	+	+++-++--++-+++---++-++--?	0.0056	0.0062
305057	rs11162463	a	g	95454	-0.746	0.4554	-	+---++---++---++--+-+-+-+	-0.0068	0.0073
305058	rs11162464	a	g	92503	0.195	0.8453	+	-+-+-+-++--+--++--+-++-?-	0.0014	0.0052
305059	rs11162469	t	c	95432	-1.183	0.237	-	----++---++----+-++---+-+	-0.0085	0.0064
305060	rs11162471	t	c	95454	0.582	0.5604	+	+--++++-++-+-++-+--+--+++	0.002	0.0057
305061	rs11162477	t	c	95454	-0.07	0.944	-	+---++++------+++-++-++-+	-0.0011	0.0058
305062	rs11162479	t	g	95377	0.79	0.4294	+	-+++----+-+++++--+-++--+-	0.0052	0.0058
305063	rs11162481	t	c	95454	-0.281	0.7788	-	--+-+-++--++----++-+-++++	-0.0013	0.0062
305064	rs11162482	t	c	95389	0.322	0.7478	+	++-+-+--++--++++--+-+----	0.0016	0.0062
305065	rs11162488	a	c	95454	-0.459	0.6463	-	+---++++-++----+--+--++-+	-0.0031	0.0057
305066	rs11162490	a	g	95454	-0.485	0.6275	-	+---++++-++----+--+--++-+	-0.0031	0.0057
305067	rs11162491	a	t	95454	0.27	0.7869	+	++-+-+--++--++++--+-+----	0.0012	0.0062
305068	rs11162492	a	g	95454	1.18	0.238	+	-+++---++-++++---+-+---+-	0.007	0.0056
305069	rs11162494	a	t	95280	-0.747	0.4551	-	-+--+-+-----++--+--+---+-	-0.0053	0.006
305070	rs11162495	t	g	95383	-0.069	0.9449	-	-+-+-+-++--+--++--+-++---	1e-04	0.0052
305071	rs11162498	t	c	95454	0.287	0.7741	+	++-+++--++--++-----+---++	0.0015	0.0063
305072	rs11162507	a	c	92486	-1.27	0.2039	-	+---?-+-+-++-----+-+-+---	-0.0345	0.0222
305073	rs11162513	t	c	95454	-0.411	0.6814	-	--+---++--++--+++++-+++--	-0.0023	0.0063
305074	rs11162514	a	g	95454	0.621	0.5346	+	---+-+++--++--+--+++-+--+	0.005	0.006
305075	rs11162518	a	g	95454	-1.314	0.1887	-	+--+----+++---+--+--++--+	-0.0084	0.0063
305076	rs11162519	t	c	95437	1.687	0.09152	+	-++--+++-+-+++-++-++--++-	0.0099	0.0058
305077	rs11162526	t	c	95454	-0.736	0.4615	-	---+----+-+--+-+--+-++---	-0.005	0.0071
305078	rs11162527	a	g	95454	0.663	0.5074	+	+++-++++-+-++-+-++-+--+++	0.0045	0.0072
305079	rs11162536	a	g	1839	0.317	0.7511	+	??????????????+??????????	0.016	0.0504
305080	rs11162537	t	c	8066	-1.322	0.1863	-	??????+?+--?????????--???	-0.0224	0.0173
305081	rs1116254	a	g	95454	0.347	0.7286	+	+++-+--++-+---+++++--+--+	9e-04	0.0054
305082	rs11162540	t	g	95454	-0.507	0.6122	-	+--++---+++----+++++++--+	-0.0041	0.0054
305083	rs11162541	t	c	95454	-0.475	0.635	-	+--++---+++----+++++++--+	-0.004	0.0054
305084	rs11162542	a	g	95454	-0.312	0.7547	-	-+-+----+-++-+-----+-+++-	1e-04	0.0052
305085	rs11162544	a	t	95454	-0.526	0.5992	-	+--++---+++----+++++++--+	-0.0046	0.0054
305086	rs11162546	t	c	92481	0.1	0.9206	+	-++++++-+-+-+++---+--++?-	0.0024	0.0054
305087	rs11162547	a	c	92503	0.143	0.8865	+	+------+-+-+---+++-++--?+	-0.001	0.0055
305088	rs11162549	a	t	95454	-1.04	0.2981	-	---++---+++--++-+-+-+++-+	-0.0064	0.0054
305089	rs1116255	t	c	91523	0.816	0.4144	+	+-+----+-++++++--+---++?+	0.0063	0.0075
305090	rs11162550	t	c	94704	0.683	0.4945	+	+-+--+-+---++-++-+-+-+-+?	0.0052	0.0078
305091	rs11162562	t	g	95454	-0.904	0.366	-	++-+---+------++--+---++-	-0.0055	0.0056
305092	rs11162563	t	c	95454	1.003	0.316	+	++-++++--++-+++-+++++++-+	0.0059	0.0057
305093	rs11162566	t	c	95454	1.771	0.07661	+	--+-++---+++++--++-++++++	0.0101	0.0054
305094	rs11162567	a	g	95454	-1.259	0.2078	-	--+---++------+-++----+--	-0.0061	0.0052
305095	rs11162571	t	c	92372	1.182	0.2371	+	-+++++-+++++---?---+-+++-	0.0138	0.0108
305096	rs11162573	t	c	95443	-0.129	0.8972	-	-++++--+-++--+-+-----+-+-	-0.0014	0.0114
305097	rs11162574	a	g	95454	0.152	0.8793	+	+----++-+--++-+-+++++-+-+	0.0016	0.0113
305098	rs11162576	a	g	88342	-0.553	0.58	-	-+--++---+-+-++---?--++?-	-0.0051	0.0105
305099	rs11162579	a	g	91293	0.877	0.3807	+	+-++--+++-+-+--+++?++--++	0.0078	0.0104
305100	rs1116258	t	c	93999	-1.488	0.1367	-	-++--++-+-+----+-----+--+	-0.0066	0.0052
305101	rs11162581	a	g	95454	0.222	0.824	+	++---++-+--++-+-+++++-+-+	0.0018	0.0112
305102	rs11162582	t	g	88342	0.264	0.7915	+	+-++--+++-+-+--+++?++--?-	0.0018	0.0105
305103	rs11162583	t	c	95454	-1.147	0.2514	-	++-+-++-+---+-+++++------	-0.0071	0.0057
305104	rs11162585	a	g	95454	-0.7	0.4842	-	++++--+-+---+-+++-++-----	-0.0049	0.0054
305105	rs11162594	a	t	95454	-1.024	0.3057	-	---------+++-+-+-----+-+-	-0.0047	0.006
305106	rs11162599	a	t	95454	0.237	0.8126	+	---+--+-+++--++++++--++--	0.0028	0.0072
305107	rs1116260	a	g	8644	-0.459	0.6462	-	?????????????--??????????	-0.0093	0.0203
305108	rs11162601	a	g	95454	-0.463	0.6432	-	+-+-+-++-+---++--++-----+	-0.0032	0.0056
305109	rs11162610	t	g	95454	-0.443	0.6578	-	+++-++-+---++------++--++	-0.0034	0.0069
305110	rs11162612	a	g	95454	0.459	0.6464	+	++-+-+--+++-+-+++-+++-+-+	0.0022	0.0052
305111	rs11162613	t	c	92503	-0.549	0.5832	-	++--++-+---++------++--?+	-0.0043	0.0069
305112	rs11162615	a	t	92476	0.292	0.7702	+	---+-++-+-++++-+++-++++?-	0.0024	0.0055
305113	rs11162616	t	c	10121	0.513	0.6079	+	?????????????+??????++???	0.0098	0.0176
305114	rs11162624	t	c	95454	0.383	0.7017	+	--++--+-+++--++++++--++--	0.0033	0.0069
305115	rs11162625	c	g	95454	-0.145	0.8847	-	+++-++---++++-+-+--++-+-+	-5e-04	0.0062
305116	rs11162630	a	c	95454	-0.266	0.7904	-	++--++-+---++------++--++	-0.0015	0.0068
305117	rs11162631	t	c	95454	-0.099	0.921	-	---+-++-+-++++-++--++++--	1e-04	0.0059
305118	rs11162632	t	c	95445	-0.026	0.9792	-	---+--+-+---++-+++---++--	0	0.0054
305119	rs11162633	t	c	95424	-0.13	0.8969	-	+++-++-+---++------++--++	-7e-04	0.007
305120	rs11162634	t	c	88211	-1.379	0.1677	-	-+++------++---?--?+++-+-	-0.0088	0.0073
305121	rs11162635	a	g	87256	-0.449	0.6532	-	-+++--++--+++--?-+-++++--	-0.0023	0.012
305122	rs11162636	a	t	92372	0.504	0.6146	+	+---++--++---++?+-+----++	0.0027	0.0118
305123	rs11162638	t	c	91293	-1.799	0.07208	-	-++----+--+----+--?+++---	-0.0082	0.0055
305124	rs11162643	a	t	95454	0.716	0.4739	+	+---++-----+++++-----+-++	0.0049	0.0073
305125	rs11162648	a	g	92503	1.634	0.1022	+	+--++++-++-++++++-----+?+	0.0076	0.0052
305126	rs1116266	a	g	95454	0.814	0.4158	+	-++----+-+++++++++-+-----	0.0062	0.0064
305127	rs11162662	a	g	10121	-0.619	0.5358	-	?????????????+??????+-???	-0.015	0.0199
305128	rs11162664	a	c	95454	-1.161	0.2457	-	---++--+-+--++++++-++-+--	-0.0035	0.0059
305129	rs11162685	c	g	92498	0.55	0.5822	+	---++----++-+--+++-+-++?+	0.0042	0.0052
305130	rs11162686	a	t	10100	-2.159	0.03083	-	?????????????-??????+-???	-0.0334	0.0152
305131	rs11162695	t	c	95404	-1.757	0.07897	-	+++--++-+---+-+-+-+----+-	-0.0101	0.0052
305132	rs11162696	t	c	95454	1.644	0.1001	+	---++--+-+++-+-+-+-++++-+	0.0095	0.0052
305133	rs11162697	a	g	95454	-1.76	0.07836	-	+++--++-+---+-+-+-+----+-	-0.0101	0.0052
305134	rs11162698	a	t	92371	-0.437	0.6622	-	-++-+--+++-+--+?---+-+++-	-0.0054	0.0152
305135	rs11162701	c	g	92503	-0.164	0.8697	-	-++-+---++-+--++-+-+-++?-	-0.0038	0.0139
305136	rs11162703	a	g	35729	-0.502	0.6157	-	?-+?++----??++??+++-??-??	-0.0127	0.0187
305137	rs11162704	a	t	35729	-0.502	0.6155	-	?-+?++----??++??+++-??-??	-0.0127	0.0187
305138	rs11162705	a	c	38680	-0.207	0.8362	-	?++?++----??++??+-+-??-+?	-0.0023	0.008
305139	rs11162708	t	c	95452	-0.084	0.9328	-	+--+-+++--+-++--+-+-+---+	-0.0021	0.0148
305140	rs11162709	a	g	95454	0.267	0.7891	+	-++-+--+++-+--++-+-+-+++-	0.0046	0.0147
305141	rs11162710	t	c	95345	0.133	0.8938	+	-++-+--+++-+--++-+-+-+++-	0.0034	0.0148
305142	rs11162711	t	c	92503	0.032	0.9744	+	+--+-++---+-++--+-+-+--?+	-0.0011	0.0149
305143	rs11162712	t	c	92503	0.117	0.907	+	-++-+--+++-+--++-+-+-++?-	0.0028	0.0149
305144	rs11162713	t	c	92503	0.109	0.9135	+	-++-+--+++-+--++-+-+-++?-	0.0025	0.015
305145	rs11162715	t	c	1717	0.652	0.5145	+	????+????????????????????	0.1058	0.1616
305146	rs11162729	a	g	89421	-1.361	0.1735	-	+----++-+---+-+?++--+--?-	-0.0209	0.0138
305147	rs11162732	t	c	95361	0.311	0.7555	+	++++--+++-++--+-+-+++--+-	5e-04	0.0053
305148	rs11162735	a	g	95454	-1.483	0.1381	-	+++-++----+---+-+--++--+-	-0.0081	0.0052
305149	rs11162738	t	c	95454	0.861	0.3892	+	++-+-+----++-+-+--++-++++	0.0038	0.0054
305150	rs11162740	a	c	92372	1.698	0.08956	+	-++++--+-+++-+-?--++-++++	0.0242	0.0127
305151	rs11162741	t	c	95454	-0.039	0.9693	-	+++--++-+-++--+-+-+-+--++	-0.0013	0.0053
305152	rs11162743	t	g	92372	1.673	0.09424	+	-++++--+-+++-+-?--++-++++	0.0248	0.013
305153	rs11162748	a	g	92372	1.679	0.09314	+	-++++--+-+++-+-?--++-++++	0.0247	0.0129
305154	rs11162749	a	g	92503	-2.205	0.02742	-	--+-++---+--+-++++-+---?-	-0.0146	0.0071
305155	rs11162752	a	g	92503	0.373	0.7092	+	---++--+-+-+++-+-+-+++-?-	0.0026	0.0053
305156	rs11162755	t	c	95249	1.609	0.1077	+	+--++-+++-++-+-+++++-+--+	0.0079	0.0051
305157	rs11162757	a	t	95454	2.664	0.007731	+	++--+-+++-++-+----+--++++	0.0172	0.0064
305158	rs11162765	t	c	95454	-2.197	0.02804	-	--+-++---+--+-++-+-+-----	-0.0133	0.0065
305159	rs11162766	a	c	87672	-0.707	0.4796	-	+?++-++-+-+-+++++-----++-	-0.0077	0.0105
305160	rs11162772	a	g	95454	-0.938	0.3481	-	+++-++--+-+-+-++-+----++-	-0.0053	0.0054
305161	rs11162773	t	c	92467	-1.021	0.3072	-	+++-+---+-+--++----+---?+	-0.0076	0.0066
305162	rs11162776	a	g	92479	-1.987	0.04691	-	+++-++--+-+---+--+-----?+	-0.011	0.0052
305163	rs1116278	a	t	7776	-0.371	0.7109	-	?????????????-???????????	-0.0071	0.0191
305164	rs11162780	t	c	95454	1.832	0.06693	+	++++---++-++-+-+-++-+-+-+	0.0103	0.0063
305165	rs11162781	c	g	95454	-1.849	0.06445	-	----+++--+--+-+-+--+-+-+-	-0.0104	0.0062
305166	rs11162785	t	g	95434	-2.011	0.04437	-	----++------+----+-+--++-	-0.0106	0.0056
305167	rs11162786	a	g	95454	1.778	0.0754	+	++++--+++-++++++--+-+-+-+	0.0099	0.0063
305168	rs11162787	a	t	95254	-2.063	0.03909	-	----++------+----+-+--++-	-0.0111	0.0056
305169	rs11162788	c	g	95454	2.228	0.02588	+	++++--++++++-++++-+-++--+	0.0117	0.0056
305170	rs11162791	a	g	95454	0.134	0.8937	+	+--++--+-+--++-+-+--++---	-8e-04	0.0066
305171	rs11162796	c	g	95454	-0.777	0.4371	-	++--+-----+-+++----+--+--	-0.0089	0.0106
305172	rs11162799	a	g	95454	0.915	0.3601	+	--++--++++-+---++++-++-++	0.0108	0.0105
305173	rs11162802	t	c	1839	-0.539	0.5898	-	??????????????-??????????	-0.0252	0.0466
305174	rs11162804	a	g	10105	-0.035	0.9717	-	?????????????-??????+-???	-0.0011	0.0337
305175	rs11162809	t	c	95454	1.583	0.1134	+	++-+---+--++++-+-+--++++-	0.0113	0.0073
305176	rs11162810	t	c	95454	-0.889	0.3739	-	--+-+-++-+--+-+-++--+-+--	-0.0034	0.0053
305177	rs11162813	a	g	95454	1.239	0.2153	+	++-+---+--++++-+----+++--	0.0088	0.0077
305178	rs11162815	c	g	87724	0.767	0.4428	+	+?-+---+--+++--+-++-++++-	0.0053	0.0082
305179	rs11162816	a	g	9629	-1.527	0.1267	-	?????????????-??????--???	-0.0633	0.0375
305180	rs11162819	t	c	95429	-0.525	0.5995	-	--+-+++-++--++++-+--+-++-	-0.0019	0.0058
305181	rs11162820	t	c	95454	-0.591	0.5548	-	--+-+++-+---++++-+--+-++-	-0.0024	0.0058
305182	rs11162822	t	c	95454	0.532	0.5946	+	++-++--+--++----+-++-+--+	0.0028	0.0059
305183	rs11162823	t	c	95454	-3.108	0.001884	-	++--++------+-+--------+-	-0.0189	0.0054
305184	rs11162824	a	t	95454	1.977	0.04803	+	-+++++--++++----++++--+++	0.0112	0.0052
305185	rs11162825	a	c	95454	-0.479	0.6317	-	--+-+-+-++----+--+-+----+	-0.0028	0.0075
305186	rs11162826	t	c	92503	0.388	0.6979	+	++-+-+-+--++++-++-+--+-?-	0.0016	0.0071
305187	rs11162827	t	c	81256	-2.532	0.01133	-	+++-+-----+---??--?----+-	-0.049	0.0177
305188	rs11162830	t	g	92240	1.364	0.1726	+	--++++-++-++----+++++-+?+	0.008	0.0053
305189	rs11162838	a	g	95454	1.863	0.06245	+	--+++--+++++----++++--+++	0.0101	0.0052
305190	rs11162839	t	c	95389	-1.04	0.2984	-	++-++--+-+--+++++--+-+---	-0.0065	0.0057
305191	rs11162840	t	c	95454	1.355	0.1755	+	--+--++-+-++-++--++++-+++	0.0083	0.0057
305192	rs11162841	a	g	95454	-1.168	0.2428	-	++-++--+-+--+++++----+---	-0.0075	0.0058
305193	rs11162842	t	c	95454	1.133	0.2572	+	--+--++-+-++-----++++-+++	0.0073	0.0058
305194	rs1116285	a	t	95446	-0.429	0.6679	-	-++---+--+++-+--+++-++---	-0.0021	0.0083
305195	rs11162850	t	g	90533	-0.463	0.6437	-	+++-+++---+--+??+++-+--++	-0.007	0.0091
305196	rs11162852	a	g	95454	-1.248	0.212	-	+----+----+--+-++--++----	-0.0108	0.0072
305197	rs11162854	t	c	95454	1.148	0.251	+	-++++-++++-++-+--++--++++	0.0101	0.0071
305198	rs1116286	a	g	95440	-0.353	0.724	-	-++---+--+++-+--+++-++---	-0.0014	0.0083
305199	rs11162862	c	g	95454	2.144	0.03202	+	-++--+-+++++----+-++-++-+	0.0112	0.0052
305200	rs11162864	t	g	95454	-3.077	0.002094	-	+--++-------++-+-+--+----	-0.0161	0.0052
305201	rs11162866	a	g	95454	0.194	0.8464	+	---+---+++-++------+-+++-	0.0037	0.0086
305202	rs11162867	a	g	87719	2.339	0.01931	+	-?+--+-++-++----+-++--+-+	0.0136	0.0055
305203	rs11162870	t	c	95438	1.349	0.1774	+	-++++++-+-+--+----+++++++	0.0086	0.0058
305204	rs11162873	t	c	95414	-1.418	0.1562	-	+------+-+-++-++++-------	-0.0088	0.0058
305205	rs11162874	a	g	92207	-2.157	0.03103	-	+--++-+-??--++++-+--+--+-	-0.0117	0.0053
305206	rs11162875	t	c	95454	1.911	0.05599	+	-++--+-+++++----+-+--++-+	0.0104	0.0052
305207	rs11162876	a	g	95454	-2.009	0.04452	-	+--++----+--++---+-+++-+-	-0.0108	0.0053
305208	rs11162879	t	c	95454	-1.782	0.07472	-	+--++----+--++---+-+++-+-	-0.0097	0.0053
305209	rs11162882	a	g	95454	1.303	0.1924	+	-+++---+--+++-+++---+---+	0.009	0.0065
305210	rs11162883	a	c	95454	1.117	0.264	+	++++---+--+++-+++---+---+	0.0067	0.0063
305211	rs11162884	t	c	95454	0.383	0.7018	+	+++--+++--+++++++-+-+----	0.0011	0.0062
305212	rs11162886	a	c	95454	0.576	0.5643	+	----+--+-++++-+-++++--+++	0.0091	0.0131
305213	rs11162893	a	g	95454	-0.226	0.8212	-	---++---++------++-+-++++	-5e-04	0.0054
305214	rs11162894	t	g	95454	0.209	0.8343	+	+++--+++--++++++--+-+----	5e-04	0.0054
305215	rs1116290	a	g	93999	0.167	0.8677	+	+-+++++--+-+--++-+-++-+--	-0.0012	0.0059
305216	rs11162903	t	c	92503	-0.482	0.6301	-	--+-----++-++----++-+++?-	-0.004	0.0094
305217	rs11162904	a	t	95454	1.025	0.3056	+	++-+-+++--++--+++-+-+---+	0.0044	0.0053
305218	rs11162905	a	g	95454	1.112	0.2662	+	++-+-+++--++-++++-+-+---+	0.0051	0.0053
305219	rs11162907	a	g	95445	0.914	0.3609	+	++-+-+++--++--+++-+-+---+	0.004	0.0053
305220	rs11162915	t	c	95454	0.042	0.9664	+	-+-+++++--+---+++--+----+	0.0011	0.0104
305221	rs11162919	a	c	95454	-0.086	0.9316	-	+++-+--+++-+------+--+++-	-0.0013	0.0084
305222	rs11162920	a	t	94049	-0.288	0.7736	-	+-?-+-++++-+-----++-+++--	-0.0077	0.0166
305223	rs11162921	t	c	90967	-0.089	0.9293	-	-+?+-++---+-+++?+--+---++	0.0026	0.0169
305224	rs11162922	a	g	95387	-0.132	0.8951	-	--+-+--+++++------+--+-+-	8e-04	0.0105
305225	rs11162923	a	c	95454	-1.151	0.2497	-	----+---++---+---++--+++-	-0.0064	0.0056
305226	rs11162927	a	g	95454	0.011	0.991	+	++-+-++-----++++++-++-+-+	-0.0021	0.0105
305227	rs11162928	t	c	95310	-0.472	0.6371	-	--+-+---++---+---++--+++-	-0.0019	0.0052
305228	rs11162929	t	c	95454	0.753	0.4516	+	--++--++++++---+-----+-+-	0.0077	0.0071
305229	rs1116294	t	c	95446	-1.337	0.1811	-	++-------++-+--+-+-+---+-	-0.0079	0.0056
305230	rs11162940	a	c	95454	0.761	0.4468	+	--++--++++++---+-----+-+-	0.0075	0.007
305231	rs11162943	t	c	95428	-1.074	0.2827	-	++--++-------++-+++++---+	-0.0095	0.0066
305232	rs11162945	a	c	95454	1.734	0.08299	+	+--++++++++++----+-+++-++	0.0134	0.0079
305233	rs11162957	a	g	86475	0.83	0.4067	+	?-++?++--+++?--?+-++-++++	0.0152	0.0201
305234	rs11162958	a	g	2530	-0.595	0.552	-	??+??????????????-???????	-0.1877	0.1552
305235	rs11162962	t	c	95454	-0.556	0.5785	-	--+-+--+++-++--+-+-+-++-+	-0.0034	0.0066
305236	rs11162963	t	c	95454	-1.561	0.1184	-	+------+-+--++-+----++-+-	-0.0098	0.0057
305237	rs11162964	a	g	51666	-1.088	0.2766	-	+-+---++????--??+??-??+??	-0.0256	0.0261
305238	rs11162968	t	c	95454	-1.873	0.06105	-	--++-+--++-+-------+-++--	-0.0093	0.006
305239	rs11162975	a	g	95454	-1.852	0.06397	-	--+-----++-+-----+-+-++--	-0.0088	0.0054
305240	rs11162988	a	g	95454	-1.959	0.05007	-	--++----++------+--+-++--	-0.0094	0.0053
305241	rs11163003	a	g	95454	2.229	0.02581	+	++--++++--+-+++++-+-+--++	0.011	0.0058
305242	rs11163007	t	c	95454	-2.514	0.01193	-	---+----++-+-------+-++--	-0.0126	0.0059
305243	rs11163012	t	c	95454	1.632	0.1026	+	+++--++-+++++-++--+++---+	0.0096	0.0058
305244	rs11163016	a	g	95454	1.071	0.284	+	--++--+-++-+-++++-+-+++--	0.0113	0.0098
305245	rs11163022	t	c	95454	1.588	0.1124	+	-+-+-+---+++-+++-+--++-+-	0.0209	0.0124
305246	rs11163025	c	g	95454	0.59	0.5549	+	-++-+-+-++--+++-+-----+-+	0.0052	0.0074
305247	rs11163027	t	c	95399	0.555	0.5786	+	++++-+-+-+-++-++-++--+-++	0.0036	0.0077
305248	rs11163032	t	c	95359	0.365	0.7154	+	--+-+-+++--++-++--++--+-+	0.0042	0.0095
305249	rs11163039	a	g	95454	0.078	0.938	+	+-+++-++---++--++++---+-+	0	0.006
305250	rs1116304	t	c	7776	-0.263	0.7925	-	?????????????-???????????	-0.0049	0.0188
305251	rs11163040	t	c	95454	-0.685	0.4935	-	-+--++--+++--++-+---+-++-	-0.004	0.01
305252	rs11163041	t	c	95454	0.649	0.5166	+	+-++--++---++--+-+++-+--+	0.0042	0.01
305253	rs11163042	t	c	95454	-1.679	0.09324	-	+---+++-+++-++--++-+-+-+-	-0.0263	0.0138
305254	rs11163043	a	g	95452	-1.683	0.0923	-	+---+-+-+++-++--++-+-+-+-	-0.0264	0.0138
305255	rs11163044	t	c	95454	-0.659	0.5099	-	-+--++--+++--++-+---+-++-	-0.0039	0.01
305256	rs11163045	a	g	92503	-1.949	0.05124	-	+---+-+-+++-+---++-+-+-?-	-0.0299	0.014
305257	rs11163047	a	g	92420	0.531	0.5956	+	-++-+++++++-++-++--++-+?-	0.006	0.0075
305258	rs11163048	t	c	95454	0.672	0.5016	+	+-++--++---++--+-+++-+--+	0.004	0.0098
305259	rs11163052	t	g	95454	0.524	0.6003	+	+-++--++---++----+++-+--+	0.0029	0.0099
305260	rs11163053	t	g	95454	0.513	0.608	+	+-++-------+--+--++--+-++	0.0014	0.0083
305261	rs11163054	a	t	92483	-1.623	0.1045	-	+--+------+++----++--+-?-	-0.0143	0.0075
305262	rs11163055	t	c	95443	1.454	0.146	+	-++-++++++---++++--++-+-+	0.0129	0.0074
305263	rs11163056	a	g	92307	1.283	0.1995	+	-+---++-++--+++?--++++--+	0.0082	0.0056
305264	rs11163057	a	g	95454	1.457	0.1452	+	-++-++++++---++++--++-+-+	0.013	0.0074
305265	rs11163058	a	g	95454	0.145	0.8846	+	+-++--++---++----++-++-++	-0.0012	0.0118
305266	rs11163059	c	g	95454	1.127	0.2599	+	-+--++-++++--++++---+-++-	0.0116	0.0089
305267	rs11163065	a	t	95454	-0.045	0.9643	-	+++-+--+--+--+--++-----+-	-9e-04	0.0064
305268	rs11163067	t	g	95454	0.192	0.8475	+	+++-+--+--+--+--++-----+-	3e-04	0.0064
305269	rs11163072	t	c	95454	-1.407	0.1595	-	---++-++--++----++---+---	-0.0102	0.008
305270	rs11163073	a	g	95454	0.268	0.7885	+	+---+---+-+-++++-+-++-+++	-0.0017	0.0121
305271	rs11163074	a	g	95404	1.357	0.1746	+	++---+--++++++-+--+++++0-	0.0067	0.0052
305272	rs11163075	c	g	95450	0.736	0.4618	+	-++-+++++++--++-+-+--+--+	0.0043	0.0071
305273	rs11163077	t	c	95452	0.209	0.8341	+	-+++-+++-+-+----+-+--+---	0.0058	0.012
305274	rs11163078	a	t	95341	-0.104	0.9168	-	+---+---+-+-++++-+-++-+++	-0.0051	0.0121
305275	rs11163079	t	c	95454	0.195	0.8451	+	+---+--++-+-++++---++-+++	-0.0033	0.0121
305276	rs11163085	a	g	95454	0.678	0.4978	+	-++++++++++--++-+-+--+--+	0.004	0.0071
305277	rs11163087	a	c	95441	-0.026	0.9796	-	---+++-+--+--++-+---+-+++	-8e-04	0.0055
305278	rs11163088	t	c	95454	-0.28	0.7797	-	+-++-+--+++++-++++--+--+-	-0.0028	0.0086
305279	rs11163089	t	c	92497	0.092	0.9271	+	++---+--+-++---+--++-+-?-	1e-04	0.0054
305280	rs11163090	t	c	94704	-0.326	0.7442	-	-+--++--++---+--------+-?	-0.0014	0.0054
305281	rs11163091	a	c	95454	0.548	0.5836	+	+-++--++--+++-++++++++-++	0.0026	0.0053
305282	rs11163092	t	g	95454	-0.364	0.7161	-	-+-+++-+----+++-+--++-+--	-0.0013	0.0058
305283	rs11163094	a	g	95454	-0.341	0.7334	-	-+-+++-+----+++----++-+--	-0.0015	0.0066
305284	rs11163099	t	g	95454	0.079	0.9368	+	-+-+++++----+++----++-+--	0.0014	0.0064
305285	rs11163106	t	c	95454	-0.203	0.8391	-	+--+-++-----+++--+++-----	-0.0019	0.0054
305286	rs11163114	a	g	95454	0.902	0.3673	+	++---+-++-++-+-+--++-++++	0.0041	0.0053
305287	rs11163123	a	t	8318	1.037	0.2996	+	??????+?++-?????????-+???	0.0786	0.0635
305288	rs1116313	a	g	32894	-0.768	0.4422	-	+??-??????-??-?+????-+??-	-0.009	0.0093
305289	rs11163134	a	t	7776	1.055	0.2916	+	?????????????+???????????	0.0258	0.0244
305290	rs11163137	a	g	8342	0.848	0.3967	+	??????+?++-?????????-+???	0.068	0.0633
305291	rs11163145	t	c	95454	-1.296	0.1948	-	++---+++-+--+----+--+++-+	-0.0103	0.0083
305292	rs11163153	a	c	95454	-0.437	0.6624	-	+-+-+-+--++-++-+-+---+-++	-0.0057	0.0087
305293	rs11163154	a	c	95454	-0.48	0.6316	-	--+++-+--+--+-+-++--+---+	-0.0021	0.0053
305294	rs11163157	a	g	91753	1.089	0.2763	+	+++--++--+-+-+-+++-++++??	0.0107	0.0109
305295	rs11163158	t	g	95447	-0.136	0.8921	-	--+++-+++--++-+-+-++++--+	2e-04	0.0079
305296	rs11163159	a	g	95454	1.385	0.1661	+	+++--++--+-+-+-+++-++++++	0.0136	0.0107
305297	rs11163164	a	g	95454	-0.836	0.4033	-	+++---+-++-++----+++-----	-0.0069	0.0066
305298	rs11163165	t	c	29152	0.292	0.7706	+	???-???+?????+??++?-?-???	0.0145	0.0396
305299	rs11163166	a	g	29152	-0.388	0.6977	-	???+???-?????-??--?+?+???	-0.0154	0.0425
305300	rs11163167	a	g	29152	-0.188	0.8508	-	???+???-?????-??--?+?+???	-0.0077	0.0432
305301	rs11163169	t	c	95454	1.491	0.136	+	-+--+++++-++-++-+-+---++-	0.0106	0.0066
305302	rs11163171	a	g	92372	-0.755	0.4504	-	++----+-+-+--++?++----+--	-0.0071	0.0113
305303	rs11163174	a	g	72867	-0.895	0.3707	-	??----++--+--++?++?-+---+	-0.019	0.0248
305304	rs11163175	a	g	80610	0.831	0.4062	+	?+++++--++-++--?--?+-+++-	0.0152	0.0229
305305	rs11163177	t	g	90308	-0.893	0.3718	-	+-++---+--++-+-++---+-+-+	-0.0107	0.0109
305306	rs11163178	t	c	92372	-0.935	0.3496	-	+--+----+---+--?++-+++-+-	-0.013	0.0118
305307	rs11163179	t	c	95454	-0.092	0.9269	-	-+-++--++-++--+----++--+-	0.0015	0.0056
305308	rs11163180	a	g	95454	1.208	0.2269	+	-++++--++--++-++---+-+--+	0.0147	0.0105
305309	rs11163181	t	c	95454	-0.686	0.4925	-	+-++++----++++--+-----++-	-0.0122	0.0126
305310	rs11163182	t	c	95440	-0.745	0.4561	-	-+-+++-++-++-+---+-++--+-	-0.003	0.006
305311	rs11163183	t	c	95454	-0.087	0.9303	-	+++---++++--+----++-++--+	-0.0021	0.0067
305312	rs11163185	t	c	95454	0.327	0.7438	+	++---+-+--++-+-+--++---+-	8e-04	0.0055
305313	rs11163189	t	c	56015	0.032	0.9743	+	--??--++---+-???-???--+-?	0.0019	0.0114
305314	rs11163192	a	t	95389	0.06	0.9523	+	+--+++-+-+-+----++++--+-+	-7e-04	0.0054
305315	rs11163193	t	c	95454	-0.215	0.8296	-	-++---+-+++-++++----++-+-	-1e-04	0.0054
305316	rs11163194	a	g	95436	-0.128	0.8985	-	-++---+-++--+++-----+--+-	1e-04	0.0053
305317	rs11163195	t	c	95454	0.077	0.9389	+	+--+++-+--++---+++++-++-+	-4e-04	0.0053
305318	rs11163196	t	c	95454	1.772	0.07644	+	+++--++---++-++++++--+++-	0.0169	0.0114
305319	rs11163198	a	t	95454	0.523	0.601	+	+--+++---+++-+++++++--+--	0.0019	0.0052
305320	rs11163200	a	g	95454	-0.79	0.4297	-	-+--+---++-++-++--+---+-+	-0.005	0.006
305321	rs11163201	t	c	95454	0.574	0.5662	+	-----+--+++--++-++++--++-	0.0042	0.0057
305322	rs11163202	a	g	95454	0.833	0.405	+	+--+++---+++-+++++++--+--	0.0038	0.0052
305323	rs11163203	a	g	95454	0.556	0.5784	+	+--+++---+++-+++++++--+--	0.0023	0.0052
305324	rs11163209	t	c	92372	-0.734	0.4629	-	---+++-+------+?-----+-++	-0.0045	0.0065
305325	rs11163210	t	c	92372	-0.829	0.4069	-	---+++-+------+?-----+-++	-0.005	0.0065
305326	rs11163213	a	g	95454	1.238	0.2159	+	-++---+-++--++++-++++++++	0.0078	0.0054
305327	rs11163216	a	g	95454	-0.695	0.4868	-	++-+++++--+++---+--------	-0.0041	0.0052
305328	rs1116323	t	c	94456	2.628	0.008577	+	++++-+++++-+-+--++--+++++	0.0188	0.0073
305329	rs11163231	a	g	95454	-1.081	0.2799	-	+--+++-+--++----+--------	-0.007	0.0056
305330	rs11163232	t	c	92447	1.353	0.1762	+	-++---+-++--++++-++++++?+	0.0079	0.0054
305331	rs11163235	t	c	95420	-1.093	0.2744	-	+--+++++--++----+--------	-0.0063	0.0053
305332	rs11163236	a	g	95454	-0.808	0.419	-	+--+++-+--++--+-+----++--	-0.005	0.0054
305333	rs11163245	a	g	95454	-1.048	0.2947	-	--+-++-----++----+---+--+	-0.005	0.0054
305334	rs11163252	t	c	95454	-0.512	0.609	-	+---++-++--+++-+-+------+	-0.0043	0.0101
305335	rs11163254	t	c	95454	0.364	0.7157	+	-+++-+---++++--+-+--+---+	0.0023	0.0053
305336	rs11163255	t	c	95454	0.765	0.4445	+	+----++++++--+++--+++-++-	0.0037	0.0052
305337	rs11163259	t	c	95397	0.769	0.4421	+	+----+++-++-+++++-++-+++-	0.0036	0.0052
305338	rs1116326	a	g	7776	0.08	0.9359	+	?????????????+???????????	0.0019	0.0235
305339	rs11163260	a	g	92372	-0.108	0.9141	-	+-++++---+++--+?--+-++-+-	-0.004	0.0098
305340	rs11163261	t	c	95411	-0.792	0.4285	-	---+-++----+++-+--------+	-0.0037	0.0053
305341	rs11163262	t	c	95444	0.631	0.5284	+	+++-+--++++---+-++++++++-	0.0029	0.0053
305342	rs11163267	t	c	95439	0.475	0.6349	+	+-++++++-+++--+++-------+	0.0036	0.0053
305343	rs1116327	t	c	9615	0.7	0.4841	+	?????????????++??????????	0.0094	0.0165
305344	rs11163274	t	c	95454	-0.799	0.4241	-	-++--++---+---+++++-++---	-0.0057	0.0087
305345	rs11163275	t	c	95454	-1.009	0.3128	-	----+++-+++--+++++++++--+	-0.0055	0.0053
305346	rs11163280	t	c	87695	0.142	0.8873	+	-?--++-+-+-++--+-+-++++--	0.0014	0.0056
305347	rs11163281	a	c	87705	-0.183	0.8548	-	+?++--+-+-+--++-+-+----++	-0.0016	0.0056
305348	rs11163282	a	t	95454	0.175	0.861	+	+-++--+-+++--+-++++--+--+	6e-04	0.0052
305349	rs11163284	t	c	95200	0.029	0.9771	+	+-++--+-+++--+-++++--+--+	-3e-04	0.0052
305350	rs11163285	t	c	95454	-0.313	0.7541	-	+-+---+-+++-+++++-------+	-0.0015	0.0065
305351	rs11163286	a	g	95454	0.301	0.7637	+	-+-+++-+---+-----+++++++-	0.0013	0.0065
305352	rs11163287	t	c	95398	-1.643	0.1004	-	-----+-+----+--+++-++-++-	-0.011	0.0069
305353	rs11163289	a	t	92441	1.857	0.06337	+	+++++-+-++++-++---+----?+	0.0131	0.0071
305354	rs11163290	t	c	95454	-1.382	0.167	-	-----+-+-+---+-+++--+++++	-0.0118	0.0087
305355	rs11163291	a	g	1839	1.275	0.2024	+	??????????????+??????????	0.0584	0.0456
305356	rs11163293	a	g	90475	2.202	0.02768	+	++++-+++-+++++??--++-+--+	0.0174	0.0084
305357	rs11163294	a	g	92372	0.405	0.6852	+	-+++--+--+-++--?---+----+	0.0085	0.0116
305358	rs11163295	t	g	95454	0.148	0.8825	+	+++-+---+-++---+-++--+++-	6e-04	0.0054
305359	rs11163296	t	c	95388	0.083	0.9339	+	+++-+---+-++---+-++---++-	3e-04	0.0053
305360	rs11163298	t	c	92366	0.636	0.5249	+	-+++--++-+-++--?+--++---+	0.012	0.0118
305361	rs1116330	a	t	95454	0.622	0.5341	+	+-++---+--+-++--++--++---	0.0021	0.0054
305362	rs11163300	t	g	92370	0.063	0.9498	+	+----+++++-++++?++--+++--	-0.0019	0.0136
305363	rs11163302	a	g	91293	-0.339	0.7342	-	+++++--++++--++--+?++---+	-0.0057	0.013
305364	rs11163306	t	g	95454	0.918	0.3586	+	+--+-+---++-+++-++++++++-	0.0051	0.0065
305365	rs11163308	t	c	91293	0.953	0.3404	+	+--+-+---++-+++-++?+++++-	0.0055	0.006
305366	rs11163309	a	g	95454	-1.179	0.2383	-	+++---+-+-++---+++-++-++-	-0.0144	0.0118
305367	rs11163310	a	g	95454	1.034	0.3011	+	---+++-+-+--+++------+--+	0.013	0.0118
305368	rs11163311	t	c	92503	-1.154	0.2484	-	+++---+-+-++---++-+++-+?-	-0.0136	0.0118
305369	rs11163312	t	c	95454	-1.016	0.3095	-	+++---+-+-++---++++++-++-	-0.0128	0.0118
305370	rs11163313	a	g	95454	-1.063	0.2876	-	+++---+-+-++---++++++--+-	-0.0135	0.0118
305371	rs11163314	a	g	92503	1.454	0.1459	+	--++++-+-++-+++------++?+	0.0149	0.0113
305372	rs11163315	a	g	95454	-1.114	0.2651	-	+++---+-+-++---++++++--+-	-0.0141	0.0118
305373	rs11163320	t	c	82604	1.161	0.2456	+	-?----+-+-+-++++--+-++++-	0.0161	0.0146
305374	rs11163321	a	g	90338	1.192	0.2332	+	------+-+-+-++++--+-++++-	0.0149	0.0137
305375	rs11163323	t	c	95441	0.506	0.6128	+	-+---++-+++-++++++++++++-	0.003	0.0065
305376	rs11163325	t	c	63412	0.329	0.7425	+	?--?+--+-??++-??+-?-???-?	0.0075	0.0302
305377	rs11163328	a	g	38680	-1.896	0.058	-	?--?-+---+??++??+---??-+?	-0.0164	0.0088
305378	rs11163330	t	c	95454	0.958	0.3379	+	+++-++--++----++-+++-+-+-	0.0047	0.0056
305379	rs11163332	t	g	91289	0.634	0.5258	+	+++--+------++++--?-+++-+	0.0072	0.0112
305380	rs11163334	c	g	95454	-0.86	0.3896	-	----+++---+---+----+--++-	-0.0043	0.0054
305381	rs11163335	t	c	93742	1.477	0.1396	+	++++--++-+-+?+-++++-++--+	0.0076	0.0053
305382	rs11163336	t	c	95454	0.504	0.6143	+	-+++--++-+---+-++++-++--+	0.0033	0.0059
305383	rs11163338	a	g	95454	-0.777	0.4369	-	----++--+-+-+-+----+--+++	-0.0033	0.0053
305384	rs11163340	a	g	95266	-0.451	0.6521	-	-+----+++-+--+-+-+-+--+++	-0.0017	0.0054
305385	rs11163344	c	g	95454	-0.62	0.5351	-	--++-+--+++-+---+--+-+-+-	-0.0039	0.0071
305386	rs11163345	t	c	95454	0.009	0.9928	+	--++----+++-+---+--+-+-+-	0.0012	0.0079
305387	rs11163348	a	g	95454	-0.702	0.4825	-	----++--+-+-+-+----+--+++	-0.0031	0.0056
305388	rs11163349	a	g	95454	-1.561	0.1184	-	-----+--+---+---+-+-+++--	-0.0088	0.0056
305389	rs1116335	t	c	92372	1.095	0.2736	+	+-+-++++++++-++?+-+-----+	0.0108	0.0124
305390	rs11163350	t	c	95454	-1.394	0.1633	-	-----+--+---+---+-+-+++--	-0.008	0.0056
305391	rs11163354	a	g	95454	0.87	0.3842	+	-++-++-+--++---+-+++---++	0.0059	0.0087
305392	rs11163360	t	c	95446	2.176	0.02958	+	++-+--++++-++++++++-++++-	0.0153	0.0077
305393	rs11163370	c	g	95454	0.014	0.9889	+	+-+++---++---++------+++-	-7e-04	0.007
305394	rs11163371	t	g	95454	0.179	0.8578	+	-+---+-+--+++--++++++--++	0.0016	0.0079
305395	rs11163372	t	c	95452	-0.1	0.9207	-	+-+++---++---++------++--	-0.0015	0.007
305396	rs11163374	a	g	95415	-0.071	0.9431	-	+-+++---++---++------++--	-0.0013	0.007
305397	rs11163376	a	g	95368	0.508	0.6118	+	++++---++-++-++---++-+--+	0.0037	0.009
305398	rs11163377	t	g	95454	-0.456	0.6484	-	-+++---+---+-+--++---+--+	-0.0017	0.0055
305399	rs11163380	a	t	95454	1.031	0.3027	+	+-+++--++--+-+-++++--+-+-	0.0053	0.0054
305400	rs11163383	a	g	95454	-1.649	0.09906	-	+--+-++--++-+-+----++-++-	-0.0085	0.0052
305401	rs11163386	t	g	91293	0.72	0.4717	+	--++---++--+-+-+++?--+-++	0.0039	0.0057
305402	rs11163387	a	g	95454	2.797	0.005165	+	++--+-++++++--+++++-++++-	0.0184	0.0069
305403	rs11163388	a	g	95454	1.06	0.289	+	+-+++--++--+-++++++--+-++	0.0058	0.0055
305404	rs11163389	a	g	95454	1.071	0.284	+	+-+++--++--+-+-+++---+-++	0.0061	0.0058
305405	rs11163390	c	g	95454	-1.075	0.2822	-	-+---++--++-+------++-+--	-0.0059	0.0055
305406	rs11163391	t	c	95454	-1.104	0.2697	-	--+-++-+-----+--++------+	-0.0056	0.0058
305407	rs11163395	a	g	92503	1.07	0.2847	+	-+-+-++-+-+++-++-+++-++?-	0.0085	0.0075
305408	rs11163396	t	c	95454	-0.854	0.393	-	+-+-+--+-+---+--+---+--++	-0.0068	0.0074
305409	rs1116340	a	g	94483	-0.258	0.7967	-	-+--+++++-+-+++-+--+-+--+	1e-04	0.0067
305410	rs11163400	t	c	95404	2.142	0.03219	+	+--+++++++++++---+++++-++	0.0157	0.0076
305411	rs11163401	t	c	95454	-0.195	0.8456	-	--+-+--+-+--+++-+-+-++-++	-0.0014	0.007
305412	rs11163403	t	c	10121	0.52	0.6032	+	?????????????+??????++???	0.0109	0.0204
305413	rs11163408	t	c	95419	0.964	0.3349	+	+++++++++----+-++-+-+--++	0.0041	0.0052
305414	rs11163410	a	g	95454	0.848	0.3967	+	---+-++-+-+++-++-+++--+--	0.0066	0.0075
305415	rs11163411	a	t	95454	-0.027	0.9787	-	-----++++-+-+-++--++-++--	-2e-04	0.0067
305416	rs11163414	t	c	95454	-1.043	0.2968	-	---------++++-+--+-+-++--	-0.0047	0.0052
305417	rs11163417	t	c	87704	-0.977	0.3285	-	-?----+++++-+++-------+--	-0.0039	0.0055
305418	rs11163421	a	g	95454	-0.07	0.9445	-	---+-++++-+-+-++--++-++--	-0.001	0.0071
305419	rs11163422	a	t	95346	-0.45	0.6528	-	---------+-++++--+++-+--+	-0.0034	0.0056
305420	rs11163431	t	c	95454	-0.577	0.5637	-	-++++++++-+----++-+-++++-	-0.0028	0.0053
305421	rs11163432	c	g	95454	-0.53	0.5962	-	-----+---+--+++--+++---++	-0.0033	0.0054
305422	rs11163433	t	c	95443	1.253	0.2101	+	+++++-++++++----++---++-+	0.0071	0.0054
305423	rs11163435	a	g	95454	-0.582	0.5607	-	--++-+++++----+-+--++++-+	-0.0014	0.0052
305424	rs11163437	a	g	95389	-0.569	0.5693	-	+++----+--+----+++--+++-+	-0.0036	0.0056
305425	rs11163440	a	t	94704	-0.518	0.6041	-	+++-+--+++++---+++--+++-?	-0.003	0.0056
305426	rs11163442	a	c	95454	0.387	0.6989	+	+++++--+++++--+-+---+++--	0.0021	0.0052
305427	rs11163443	a	g	95454	-0.189	0.8499	-	-----++-----++-+-+++---++	-0.001	0.0052
305428	rs11163444	a	g	95454	-0.279	0.7799	-	-----++-----++-+-+++---++	-0.0014	0.0052
305429	rs1116345	t	c	93990	-0.262	0.7932	-	----++++----+++--+-++++-+	0	0.0052
305430	rs11163454	c	g	95454	-0.707	0.4796	-	-++--+---+--+--+++++++++-	-0.0059	0.0078
305431	rs11163456	a	g	95454	0.349	0.7274	+	+++-+--+++++--+-+---+++-+	0.0016	0.0052
305432	rs1116346	a	c	92469	0.148	0.8824	+	-+++++++--+-+++-++--++-?+	0.0028	0.0057
305433	rs11163461	a	c	95454	-0.191	0.8483	-	++-+-++-+-+-+--++---++--+	-1e-04	0.0069
305434	rs11163464	t	c	95420	1.009	0.3128	+	+--+-+-+++-++----++--+-++	0.0072	0.0099
305435	rs11163466	c	g	95379	0.421	0.6741	+	+-++-+++---+-++---+--+++-	0.002	0.0057
305436	rs11163467	t	c	95454	-0.338	0.7351	-	-+--+---+-+-+--+++-++---+	-0.0015	0.0055
305437	rs11163472	t	c	95447	0.478	0.6326	+	-+--++--++-++--+++-+++-++	0.0039	0.0054
305438	rs11163476	t	c	95454	1.148	0.2508	+	--+-++-+-+-+++--++-+-+++-	0.0073	0.0063
305439	rs11163480	a	g	95454	-1.867	0.06197	-	-----++--+----+++-+-+---+	-0.0168	0.0096
305440	rs11163482	t	c	92467	-0.651	0.5147	-	-+---++-+++---++-+-++--?+	-0.0024	0.0054
305441	rs11163483	a	g	95353	0.551	0.5814	+	+-+++--+-+++++--+-+--+++-	0.0019	0.0053
305442	rs11163484	a	g	95454	1.162	0.2451	+	+-+-++-+++-+++--++-+-+++-	0.0059	0.0056
305443	rs11163490	a	t	95454	-0.1	0.9205	-	-+-+-++-+-+-+--++---+++-+	7e-04	0.0069
305444	rs11163493	t	c	95380	-0.232	0.8163	-	+-+-+--+-+-+--+--+++---+-	-0.0029	0.0069
305445	rs11163494	t	g	93655	0.557	0.5777	+	+-+-+-++-+-+?++--++----+-	0.0021	0.0076
305446	rs11163496	t	c	95454	-0.166	0.868	-	+-+-+--+-+-+--+--+++---+-	-0.0023	0.0069
305447	rs11163500	a	t	95454	0.272	0.7859	+	+-+-+-++-+-++++--++----+-	-1e-04	0.0074
305448	rs11163505	c	g	95134	1.182	0.2373	+	+--++++-+++-+++++--+++++-	0.0059	0.0068
305449	rs11163507	t	c	40519	0.219	0.8268	+	?--?+++-++??+-+?+--+??++?	0.0012	0.0099
305450	rs11163513	t	g	95454	-1.365	0.1723	-	++-++----+----+--+--+--+-	-0.0106	0.0067
305451	rs11163515	t	c	60763	0.368	0.7125	+	---+--+-+-+?++??-??+-?-+?	0.0212	0.032
305452	rs11163518	t	c	95454	-0.179	0.8579	-	-++-----+--+-+++---+--+-+	-2e-04	0.0064
305453	rs11163519	t	c	95454	0.599	0.5495	+	-++-+--+-+-+++--+++--++--	0.0044	0.0052
305454	rs11163521	a	g	95454	0.593	0.5532	+	-++-+--+-+-+++--+++--++--	0.0042	0.0053
305455	rs11163523	a	g	95454	0.532	0.5947	+	+-+-++++-+---+-++-+----++	0.0026	0.0068
305456	rs11163526	a	g	92372	-1.155	0.2482	-	-+-+--+-+-+-+-+?-+++----+	-0.0124	0.0106
305457	rs11163528	a	c	92372	-1.239	0.2154	-	-+-+--+-+-+-+-+?-+++----+	-0.0129	0.0107
305458	rs11163531	a	g	95454	0.64	0.5222	+	+-+-++-++--+-+--+---++++-	0.0076	0.0112
305459	rs11163533	a	g	95454	-0.049	0.9609	-	-+++++--+--+-++-----++++-	1e-04	0.0063
305460	rs11163538	c	g	95454	-0.229	0.8191	-	--++++--+--+--+-----+++--	-0.001	0.0064
305461	rs11163539	a	g	38680	-0.81	0.4178	-	?+-?-+---+??--??-+--??+-?	-0.0064	0.0083
305462	rs11163540	t	c	38680	-0.813	0.4164	-	?+-?-+---+??--??-+--??+-?	-0.0065	0.0083
305463	rs11163542	t	c	31874	1.822	0.06851	+	???+-???+?+??+????????+-?	0.0741	0.046
305464	rs11163543	a	g	95454	0.272	0.7859	+	+-++-++-+-++---++----+-++	0.0015	0.0059
305465	rs11163544	t	c	92372	-0.15	0.881	-	+-+-++++----+++?+++++++--	-0.0012	0.0071
305466	rs11163545	t	g	95454	0.859	0.3905	+	+-+-+++-+-+++--+++-+-+---	0.005	0.0056
305467	rs11163546	t	c	95454	0.893	0.3718	+	+-+-+++-+-++++-+++-+-+---	0.0047	0.0055
305468	rs11163548	a	g	92372	0.713	0.4756	+	-+--+-+++++-++-?-+++-+--+	0.0067	0.009
305469	rs11163556	a	g	95454	-0.242	0.8088	-	+-+-++++----+---+++++++-+	-0.0024	0.0065
305470	rs11163557	t	c	95454	-0.556	0.5784	-	+-+-+-+---+-+--++++--+--+	-0.0038	0.0057
305471	rs11163559	c	g	95454	0.476	0.6344	+	-+--+-+++++-++-+-+++-+---	0.0047	0.0087
305472	rs1116356	t	c	7776	-0.472	0.6371	-	?????????????-???????????	-0.0093	0.0197
305473	rs11163560	t	c	95454	-0.328	0.7429	-	+-+-++++----+---+++++++-+	-0.0029	0.0065
305474	rs11163561	a	g	92503	0.053	0.958	+	-+-+----++++-+++-------?-	0.0011	0.0067
305475	rs11163562	a	c	92503	0.119	0.9052	+	-+-+----++++-+++-------?-	9e-04	0.0067
305476	rs11163564	t	g	92503	0.05	0.9605	+	-+-+----++++-+++-------?-	4e-04	0.0068
305477	rs11163565	c	g	92503	-0.007	0.9946	-	-+-+----++++-+++-------?-	0	0.0068
305478	rs11163566	a	c	95454	-0.336	0.7366	-	+-++-+-----+--+++-+-+-+++	-0.0039	0.0087
305479	rs11163568	t	c	95419	0.001	0.9991	+	-+-+-+--+-++--++-------+-	1e-04	0.0057
305480	rs1116357	a	g	95446	-1.092	0.2748	-	-+---+++++---+++--+---+++	-0.005	0.0052
305481	rs11163573	a	c	95279	-0.046	0.9631	-	-+-+----++++--++-------+-	1e-04	0.0068
305482	rs11163574	t	c	95424	0.015	0.9884	+	+-+-+-++-+--++--+++++++-+	1e-04	0.0057
305483	rs11163578	t	c	87648	-0.414	0.6791	-	-?++-----++-++-+-------+-	-0.0015	0.0065
305484	rs11163581	t	c	95454	0.662	0.508	+	-++--++++-++++-+-----+-++	0.0042	0.0056
305485	rs11163582	t	c	95454	-0.871	0.3838	-	+-+-+++--+-+--+-+-++-+---	-0.0084	0.008
305486	rs11163585	t	c	95368	0.789	0.4302	+	-++-+-+--++++-++-++-+---+	0.0055	0.0059
305487	rs11163586	a	g	95449	0.802	0.4228	+	-++-+-+--++++-++-++-+---+	0.0061	0.0062
305488	rs11163588	a	g	95454	-0.786	0.4318	-	+--+-+-++----+--+--+-+++-	-0.0055	0.0059
305489	rs11163597	a	g	95454	-0.608	0.543	-	+--+-+-++----+--+--+-+++-	-0.0043	0.0057
305490	rs11163602	a	g	95454	-1.022	0.3068	-	+--+-+-++----+--+--+-++++	-0.0068	0.0054
305491	rs11163610	a	c	95441	-0.948	0.3432	-	+--+-+-++----+--+--+-++++	-0.0064	0.0054
305492	rs11163616	a	c	95454	0.684	0.494	+	-++-+-+--++++-++-++-+---+	0.0046	0.0058
305493	rs11163623	a	c	95454	-0.946	0.3439	-	+--+-+-++----+--+--+-+++-	-0.0066	0.0055
305494	rs11163625	a	g	95454	-1.008	0.3135	-	+--+-+-++----+--+--+-+++-	-0.0065	0.0055
305495	rs11163627	t	c	85417	-1.009	0.3128	-	+-------+++---??++-+++-++	-0.0131	0.0116
305496	rs11163633	a	c	91293	0.444	0.6568	+	-+++----+---++++-+?-+---+	0.0035	0.0057
305497	rs11163636	t	g	1839	-0.479	0.6322	-	??????????????-??????????	-0.021	0.0438
305498	rs11163637	c	g	95454	-0.389	0.697	-	-++-+-+-++--+--++-----+--	-7e-04	0.0053
305499	rs11163639	a	g	95454	-0.876	0.3808	-	+---+++++-+---+-+--+-++--	-0.0074	0.0071
305500	rs11163640	t	c	91293	-0.631	0.5284	-	+---++--++++--+-+-?+++++-	-0.0041	0.0055
305501	rs11163641	a	g	95454	0.533	0.5943	+	-+++--++----++-+-+------+	0.0038	0.0054
305502	rs11163648	a	c	95454	-0.391	0.6958	-	++---+++++-+----+--+-++-+	-0.0023	0.0054
305503	rs1116365	a	g	93999	0.987	0.3237	+	+--++++-+--++++++-+--+-+-	0.0038	0.006
305504	rs11163652	a	g	95454	-0.417	0.677	-	+-+--+++++-+--+-+-+++-+-+	-0.0029	0.0063
305505	rs11163654	t	c	10109	-1.064	0.2871	-	?????????????-??????-+???	-0.0183	0.0172
305506	rs11163657	a	t	95454	-1.344	0.1788	-	++--+++--++-----+--+-+++-	-0.0079	0.0055
305507	rs11163658	t	c	95412	0.659	0.5098	+	---++-+--++-++++-++--+-+-	0.0046	0.0063
305508	rs11163659	t	c	92503	-0.291	0.7712	-	+++--+-+++-+----+--++--?+	-0.0025	0.0064
305509	rs11163665	a	g	92503	0.208	0.8348	+	---++-+---+-++++-++--++?-	0.002	0.0064
305510	rs1116367	t	c	9615	-0.327	0.7436	-	?????????????-+??????????	-0.0062	0.0182
305511	rs11163687	a	g	95454	-1.754	0.07942	-	+---+-----+--------++---+	-0.0175	0.009
305512	rs11163689	a	g	93834	-0.914	0.3607	-	-++--+---+--?+-++++----+-	-0.005	0.0057
305513	rs11163691	a	t	91293	-1.668	0.09524	-	--+-+++-----+--+++?--+-+-	-0.0103	0.0064
305514	rs11163695	a	c	1839	0.203	0.8394	+	??????????????+??????????	0.0104	0.0509
305515	rs11163698	a	t	94769	-1.281	0.2001	-	+--++-+---------+--++-+--	-0.0137	0.0092
305516	rs11163706	t	g	94769	1.228	0.2193	+	+--++-++++++-+++-+-++-+-+	0.0071	0.0054
305517	rs11163718	a	g	95435	-0.325	0.7454	-	--+--++-----++-++++--+-++	-0.0032	0.008
305518	rs11163719	a	g	93833	-0.549	0.5829	-	++-+--+---++?-+-+-+----+-	-0.0038	0.0064
305519	rs1116372	a	c	11510	0.083	0.9337	+	??????????-??+??????--???	-0.0058	0.0454
305520	rs11163741	t	c	2298	0.361	0.718	+	????????????????????++???	0.0143	0.0398
305521	rs11163746	a	c	2334	-0.259	0.7959	-	????????????????????--???	-0.0089	0.0339
305522	rs11163749	t	c	89454	-0.135	0.8926	-	-+-++++-+++++-?+--?++-+--	-5e-04	0.0071
305523	rs11163752	t	c	95454	-1.739	0.08206	-	--++-------------+------+	-0.0093	0.0055
305524	rs11163755	a	g	95454	0.809	0.4187	+	++--++-++-++++-++-+--+++-	0.0042	0.0062
305525	rs11163758	t	c	95454	0.796	0.4263	+	+-++-++--+++--+++--++-++-	0.0038	0.0053
305526	rs11163762	t	c	95454	0.232	0.8166	+	++--+----+-++++--+-+++--+	0.0017	0.0055
305527	rs11163763	t	c	93612	-0.105	0.9164	-	--+-?+--+-++--++---+-+---	-0.0019	0.0163
305528	rs11163764	a	g	95440	-0.032	0.9746	-	--+--+--+-++--++---+-+---	0.001	0.0165
305529	rs11163765	t	c	95454	0.345	0.7297	+	-++--++-++++-++++--+-----	0.0024	0.0051
305530	rs11163768	t	c	92503	0.414	0.6789	+	+--+--++---+++++-++-+-+?+	0.0019	0.0074
305531	rs11163770	c	g	95454	0.694	0.4874	+	++-++-++--+-++---+++++++-	0.0047	0.0081
305532	rs11163772	a	g	92463	-0.429	0.668	-	-++-++--+++-----+--+-+-?-	-0.002	0.0074
305533	rs11163777	c	g	95454	1.254	0.2097	+	++-+-++--+++-+++---++-+--	0.0075	0.0054
305534	rs1116378	c	g	95430	-0.223	0.8234	-	-+-+--+++-+++++----++----	-5e-04	0.006
305535	rs11163783	t	c	95446	0.836	0.4031	+	+----+++++++-++++-----+--	0.0046	0.0053
305536	rs11163785	c	g	92503	0.671	0.502	+	+++++++++--++-+-+-+--+-?-	0.0186	0.0217
305537	rs11163786	a	g	95454	0.909	0.3633	+	+----+++++++-++++-----+--	0.0051	0.0052
305538	rs11163788	a	c	95454	-0.85	0.3952	-	+-+-+----+-------+++++-++	-0.005	0.0052
305539	rs11163789	t	c	95454	-0.536	0.5916	-	---+++++-+---+-++-+---+++	-0.0057	0.0138
305540	rs11163790	a	g	95454	-0.73	0.4654	-	+-+-+----+-------+++++-++	-0.0044	0.0052
305541	rs11163792	t	c	95413	-0.511	0.6094	-	--+--++++---+++++---+-+--	-0.0027	0.0057
305542	rs11163793	a	c	95454	0.571	0.568	+	++-++--+-+++-----+++-+-++	0.0033	0.0057
305543	rs11163794	t	c	95448	0.816	0.4145	+	---+-++++++++++++-----+--	0.005	0.0053
305544	rs11163795	c	g	95447	0.964	0.3349	+	---+-++++++++++++-----+--	0.0057	0.0053
305545	rs11163797	a	g	92372	-0.53	0.5959	-	--+++--+++--+--?++----+-+	-6e-04	0.0112
305546	rs11163798	t	c	95454	-1.632	0.1027	-	--+++-+-+---+--++-+-+---+	-0.0092	0.0059
305547	rs1116380	t	c	95446	1.219	0.2227	+	++---+++++++++-+---++-++-	0.0103	0.0082
305548	rs11163801	t	c	95454	0.467	0.6408	+	-+++++---+-+-+--++++-+--+	0.0038	0.0052
305549	rs11163805	t	c	95454	0.85	0.3955	+	+----+-++-++++++++---+++-	0.0049	0.0064
305550	rs11163811	t	g	95454	-0.156	0.8758	-	-+-++-+----+-++---+++---+	-0.0015	0.0073
305551	rs11163819	a	g	95420	0.165	0.8692	+	++--+++--+---+-++-++--+--	3e-04	0.0054
305552	rs11163821	t	g	92503	-0.307	0.7588	-	--++---++++++-+--+--++-?+	-8e-04	0.0054
305553	rs11163823	a	g	95416	0.582	0.5607	+	--++-+--+++++-+--+--++--+	0.0044	0.0054
305554	rs11163824	t	c	8342	-0.839	0.4017	-	??????-?++-?????????--???	-0.0525	0.0633
305555	rs11163827	t	c	95454	0.088	0.9298	+	---+-+-++-+-+--++-++--++-	9e-04	0.0057
305556	rs11163828	t	c	95454	0.832	0.4055	+	---++++--+-+-++---+-+-+-+	0.0068	0.0076
305557	rs11163829	t	c	95451	-0.833	0.405	-	+++----++-+-+--+++-+-+-+-	-0.0067	0.0076
305558	rs1116383	t	c	95454	-0.771	0.4406	-	-+--+-+-+---+----+----+--	-0.0028	0.0052
305559	rs11163830	a	t	95454	0.726	0.4677	+	---++++--+-+-++---+-+-+-+	0.0059	0.0076
305560	rs11163832	a	g	95454	-1.229	0.219	-	+-+---+++-+-+--+++-+-+++-	-0.0089	0.0074
305561	rs11163833	t	g	95454	-1.198	0.2311	-	+-+---+++-+-+--+++-+-+++-	-0.0087	0.0074
305562	rs11163835	t	g	95453	-1.431	0.1523	-	+-+---+++-+-+--+++-+-+++-	-0.0103	0.0073
305563	rs11163838	t	c	95454	-1.287	0.198	-	+-+---+++-+-+--+++-+-+++-	-0.0094	0.0074
305564	rs11163840	a	t	95454	-0.992	0.3211	-	+-+----++-+-+--+++---+++-	-0.008	0.0077
305565	rs11163842	a	g	95454	1.151	0.2497	+	-+-+++---+-+-++---+-+---+	0.0083	0.0072
305566	rs11163843	a	c	20086	1.168	0.2428	+	??++??-?+?+???????+???-+?	0.055	0.0507
305567	rs11163846	a	t	92503	0.587	0.5575	+	-+-++++---++-+++-------?-	0.0042	0.0058
305568	rs11163847	a	c	95454	-0.591	0.5544	-	+++----++-+-+--+++---+++-	-0.0041	0.0074
305569	rs11163848	a	g	95421	0.492	0.6227	+	---++++--+-+-++---+++---+	0.0033	0.0075
305570	rs11163849	a	g	95450	1.533	0.1253	+	-+-++++--+---++++-+++-+--	0.0083	0.0057
305571	rs11163858	a	g	10119	-0.916	0.3597	-	?????????????-??????-+???	-0.0169	0.0262
305572	rs11163860	t	c	92366	0.151	0.8797	+	+++-+-+-++-+-++--+---+-?-	8e-04	0.0057
305573	rs11163861	t	c	95454	0.036	0.9711	+	+-+++-+--+-++--+-+++--+--	0	0.0053
305574	rs11163862	a	t	95380	-0.513	0.6081	-	-----+-++++--++-+---+++++	-0.002	0.0053
305575	rs11163865	t	c	92503	-0.826	0.4089	-	-----+-++-+--++-+---+++?+	-0.0035	0.0054
305576	rs11163866	a	g	92503	0.749	0.4538	+	+++++-+--+-++--+-+++---?-	0.0032	0.0054
305577	rs11163867	t	c	32894	0.168	0.8666	+	-??-??????+??+?-????++??+	0.0035	0.0094
305578	rs11163868	t	g	92503	0.155	0.8766	+	+-+++-+--+-++--+-+++--+?-	2e-04	0.0052
305579	rs11163873	a	g	47108	1.331	0.1832	+	-?+??+++-++?-+????--??-+-	0.0409	0.0339
305580	rs11163874	c	g	92503	-0.187	0.852	-	-+---+-++-+--++-+---+++?+	-3e-04	0.0052
305581	rs11163875	t	g	92503	0.357	0.7214	+	+-+++-+--+-++--+-+++---?-	0.0012	0.0052
305582	rs11163877	a	t	92503	-0.887	0.375	-	-----+-++-+--++-+---+++?+	-0.0036	0.0053
305583	rs11163878	a	g	92503	-0.826	0.4086	-	-----+-++-+--++-+---+++?+	-0.0032	0.0052
305584	rs11163884	a	g	95454	0.283	0.7769	+	+++++-+-----++---++++-+--	8e-04	0.0052
305585	rs11163886	a	c	95454	-0.27	0.787	-	-----+-+++++--+++----+-++	-7e-04	0.0052
305586	rs11163887	a	g	95428	-0.255	0.7984	-	-----+-+++++--+++------++	-6e-04	0.0052
305587	rs11163895	t	c	87540	-0.188	0.8505	-	+-++-----+---+??-+++++-?-	-0.0079	0.0148
305588	rs11163903	a	g	95454	-0.563	0.5736	-	----+--+-+++--+++------+-	-0.0027	0.0052
305589	rs11163904	t	c	10121	0.083	0.9336	+	?????????????-??????-+???	0.0015	0.0162
305590	rs11163905	a	g	95329	-0.628	0.53	-	----+--+-+++--+++------+-	-0.0031	0.0052
305591	rs11163907	t	c	92503	1.047	0.2952	+	++++-++-+---++---++++++?+	0.0051	0.0052
305592	rs11163908	a	t	92503	1.041	0.298	+	++++-++-+---++---++++++?+	0.0051	0.0052
305593	rs11163911	a	g	95454	0.642	0.5212	+	++++-++-+---++----+++++-+	0.0031	0.0052
305594	rs11163915	t	c	95454	1.525	0.1273	+	-+++--+++-++--++++++-+++-	0.0087	0.0056
305595	rs11163916	a	g	3116	0.194	0.846	+	?????????????+???????????	0.0387	0.1985
305596	rs11163917	t	c	95454	1.221	0.222	+	-+++-+-+-+++++-++--+-++++	0.0079	0.0054
305597	rs11163923	t	c	95454	-1.088	0.2765	-	++---++-----+-+--++++++--	-0.0205	0.0144
305598	rs11163924	a	c	95441	-0.798	0.4251	-	---++----++--+-----+-++++	-0.0032	0.0057
305599	rs11163925	a	t	95454	1.619	0.1055	+	+++++---+-++-+-+-++-+++--	0.0141	0.0099
305600	rs11163927	a	g	95454	-0.987	0.3238	-	+---+++-+--++-+--++-+----	-0.0067	0.0053
305601	rs11163930	a	c	95454	0.778	0.4364	+	+++-+--++-++-++++-+----+-	0.0034	0.0055
305602	rs11163932	t	g	95454	-0.567	0.5704	-	---+--+-+++++------+++---	-0.0025	0.006
305603	rs11163933	t	c	86456	-0.492	0.623	-	++---+++-+--+-+--++++-+??	-0.0084	0.0153
305604	rs11163934	a	c	86629	-0.517	0.6053	-	++---++--+--+++--++++++??	-0.0087	0.0153
305605	rs11163937	a	t	95454	-1.375	0.1691	-	--+---+++++---+++--+---+-	-0.0069	0.0059
305606	rs11163949	a	g	95454	-0.303	0.7621	-	++-++-----+-+++---++-+--+	-0.0058	0.0125
305607	rs11163953	t	g	95454	2.071	0.03832	+	++-+++-+++++++---+-+++-++	0.0157	0.0079
305608	rs11163956	t	c	95454	0.32	0.7491	+	+-----+--+-+++++-+--++---	9e-04	0.0064
305609	rs11163958	t	c	95407	0.314	0.7534	+	----++---+-+++++-----+++-	0.0016	0.0052
305610	rs11163971	a	t	95454	-0.736	0.4619	-	+--+--+-+-+-----+++++++--	-0.0064	0.0069
305611	rs11163972	a	t	95454	0.844	0.3986	+	-++-++-+-+--++++-------++	0.0072	0.0069
305612	rs11163977	a	g	93615	-0.042	0.9666	-	---------+----?+-++++-++-	-0.0037	0.0152
305613	rs11163978	t	g	93615	0.049	0.9611	+	---------+---+?+-++++-++-	-0.0024	0.0152
305614	rs11163980	a	g	95454	-0.141	0.8877	-	+-+-++++++---+-+-+++++++-	-0.0016	0.0054
305615	rs11163981	a	g	95454	-0.987	0.3237	-	+-----+-+++------++++++--	-0.0075	0.0058
305616	rs11163983	t	c	90338	-0.357	0.7213	-	---------+-----+-++++-++-	-0.0062	0.0151
305617	rs11163984	a	c	87350	-0.359	0.7197	-	---------++----+-++++-+?-	-0.0054	0.0153
305618	rs11163987	t	c	10120	0.038	0.9696	+	?????????????+??????--???	-0.0023	0.0344
305619	rs11163995	t	c	95454	0.262	0.7932	+	+++++++++-+++++-+----+--+	0.0047	0.015
305620	rs11164000	c	g	95454	-0.987	0.3234	-	+---+---+++----+-++++++--	-0.0077	0.0063
305621	rs11164001	a	g	95454	0.241	0.8095	+	+++--+++-++--+-----+-+-+-	0.002	0.0115
305622	rs11164003	a	g	90533	0.205	0.8379	+	+-+--++++-+-++??++-+++-+-	0.0016	0.0168
305623	rs11164005	t	c	95454	-0.994	0.3204	-	+-------+++----+-++++++--	-0.0076	0.0063
305624	rs11164009	t	c	84707	0.124	0.901	+	+?+--+-+-++--+--++-+---?-	-0.0026	0.0175
305625	rs11164018	c	g	38680	-0.066	0.9474	-	?++?----+-??-+??-+++??+-?	-0.0023	0.0094
305626	rs11164023	t	c	95454	0.483	0.6293	+	--++++++---++++++---++-++	0.006	0.0068
305627	rs11164027	t	c	95454	-0.77	0.4414	-	++-----++-+----+-+--++--+	-0.0057	0.007
305628	rs1116403	a	g	94483	-0.687	0.492	-	+-+--+++---+-----+-++--+-	-0.0037	0.0055
305629	rs11164030	a	g	95454	-0.826	0.4088	-	+++----+--+----+-+--++--+	-0.0057	0.007
305630	rs11164032	a	g	92503	0.403	0.6866	+	-+-+-+--++-++---+-++--+?+	0.0021	0.0054
305631	rs11164034	a	g	92503	0.489	0.625	+	-+-+-+--++-++---+-++--+?+	0.0027	0.0054
305632	rs11164035	a	g	95454	-0.79	0.4295	-	+----++-++-++-++-+--+----	-0.005	0.0058
305633	rs11164040	a	g	33609	0.25	0.8028	+	???+???-+?+??+???+-??-+??	0.0083	0.0466
305634	rs11164042	a	g	95454	1.605	0.1084	+	-+++--+++-++--++++++-+++-	0.009	0.0056
305635	rs11164043	t	c	95454	-0.678	0.4977	-	+++---++--++---+----++---	-0.0045	0.0072
305636	rs11164046	t	g	95427	-0.8	0.4238	-	++----+---++---+----++---	-0.0057	0.008
305637	rs11164048	t	c	95439	-0.336	0.7367	-	+-+-+-++--+--+++-+--+----	-0.0022	0.0057
305638	rs11164049	a	g	87635	0.358	0.72	+	-?-----+++--++++++++-+-++	0.0019	0.0056
305639	rs11164050	t	c	95446	-0.47	0.6383	-	+-+++-----++--------+++--	-0.0024	0.0053
305640	rs11164056	t	g	92961	-0.893	0.3718	-	?--+---+-+++--++------+-+	-0.0127	0.0151
305641	rs11164111	a	g	92961	0.269	0.7878	+	?+---+++++++---+--+-++-+-	0.0017	0.0057
305642	rs11164113	a	c	95446	-1.241	0.2144	-	----++-+--+-------+-++---	-0.0078	0.0054
305643	rs11164114	t	c	10115	-0.094	0.9253	-	?????????????+??????--???	-0.0039	0.0251
305644	rs11164117	a	g	92961	-0.534	0.5934	-	?---++---+-++-+-++-++---+	-0.0028	0.0052
305645	rs1116412	c	g	7776	0.568	0.5702	+	?????????????+???????????	0.0135	0.0237
305646	rs11164122	t	c	92961	-1.019	0.3082	-	?--+-------+----+--+++-++	-0.0053	0.0059
305647	rs11164131	t	g	94483	0.751	0.4524	+	+++++----++++--++++++---+	0.0052	0.0067
305648	rs11164132	t	c	94483	-0.632	0.5275	-	--+-++-+--+-+--+++---+--+	-0.0033	0.0062
305649	rs11164135	t	c	31173	-0.856	0.3923	-	-??-??????+??-?+????++???	-0.0123	0.0197
305650	rs11164137	a	g	94483	0.266	0.7899	+	+-++-++++-+--+--++---++--	-0.001	0.0074
305651	rs11164140	a	g	9149	-2.121	0.0339	-	?????????????-??????--???	-0.0532	0.0258
305652	rs11164141	t	c	94483	-1.166	0.2437	-	+-+----++-+---+-+++---+--	-0.0067	0.0054
305653	rs11164142	a	g	31923	-0.376	0.7073	-	-??+??????+??-?+????+-??+	-0.0014	0.0135
305654	rs11164143	a	g	93091	0.542	0.5882	+	-+++--++--?+++++++--+-+++	0.0064	0.0075
305655	rs11164144	a	g	90314	1.909	0.05623	+	++-+--+++-+-++-+++?-+-+-+	0.0133	0.007
305656	rs11164150	t	c	31923	0.818	0.4135	+	+??+??????-??-?+????++??+	0.0068	0.0102
305657	rs11164159	t	c	72402	-0.283	0.7773	-	-++-+--+---?++-++++-----+	-0.001	0.006
305658	rs11164161	t	c	77382	0.861	0.3895	+	?+-----+---+--???+?+--+++	0.0222	0.0245
305659	rs11164164	t	c	85417	-0.26	0.7952	-	-+++---+--+-++??-+--++---	-6e-04	0.0094
305660	rs11164166	t	c	94483	-0.016	0.9876	-	+++--+-+-+---++-+++++----	-2e-04	0.0055
305661	rs11164167	a	t	94483	0.719	0.4722	+	++-+-+--+--++-+----+-++++	0.004	0.0065
305662	rs11164173	t	c	95454	0.226	0.8213	+	++--++-+-+----+++---++--+	0.001	0.0062
305663	rs11164176	a	g	95454	-0.715	0.4748	-	--+++---+-+++-++--++--++-	-0.0029	0.0053
305664	rs11164177	t	c	95454	-0.35	0.7266	-	--+++--++-+++-++--++--++-	-0.0013	0.0051
305665	rs1116418	a	c	95454	-1.655	0.09798	-	+++-+++--++------+---+---	-0.0099	0.0059
305666	rs11164181	t	c	90533	-0.284	0.7765	-	-++--+---++---??-++--+--+	-0.0039	0.0144
305667	rs11164183	t	c	92372	-0.602	0.5471	-	--+--++-++-+---?-+---+-++	-0.0028	0.0058
305668	rs11164184	a	g	95454	-0.533	0.594	-	--++-----------+++++---++	-0.0017	0.0058
305669	rs11164196	t	c	10103	-0.195	0.8455	-	?????????????-??????--???	-0.0032	0.0158
305670	rs11164198	t	c	95454	0.205	0.8378	+	-++-+-++--++++++++++----+	0.002	0.0054
305671	rs11164201	t	c	95454	0.43	0.6671	+	+++-+++--++-+++-+++-++--+	0.0023	0.0055
305672	rs11164204	a	t	95454	2.111	0.03481	+	+-++++++++-++++-----++++-	0.0139	0.0072
305673	rs11164205	t	g	95449	0.582	0.5602	+	++-+-+-+++-++++----+-+++-	0.0032	0.0093
305674	rs11164210	t	g	95454	0.317	0.7512	+	++-+++-+++-++++----+-++--	0.0018	0.0094
305675	rs11164212	a	c	95454	0.653	0.5136	+	+++-+-++-+---+++---+----+	0.0047	0.0059
305676	rs11164227	a	t	88840	1.803	0.07143	+	+++-+++--+-+++??----+?+-+	0.0197	0.013
305677	rs11164230	a	c	90533	-1.185	0.2361	-	---++--++-+---??++-+--++-	-0.0067	0.0068
305678	rs11164235	a	g	95454	-0.138	0.8903	-	+--+-+--++---+------++++-	-0.0015	0.0053
305679	rs11164236	t	c	95454	-0.264	0.7915	-	+--+-+--++----------++++-	-0.0022	0.0053
305680	rs11164243	c	g	86979	0.199	0.8424	+	+++----++-+++-+?-+-------	8e-04	0.0154
305681	rs11164245	a	g	84028	0.328	0.7432	+	+++----++-+++-+?-+-----?-	0.0013	0.0154
305682	rs11164247	a	t	90378	0.641	0.5213	+	+++-?--++-++--+?-+-------	0.0028	0.0152
305683	rs11164248	t	c	86967	0.077	0.9384	+	+-+----++--+--+?-+--+----	-0.0019	0.0142
305684	rs11164250	t	c	87256	-0.204	0.8386	-	---++++--+-----?+-+++++-+	0.0013	0.0149
305685	rs11164251	a	g	88909	0.166	0.8678	+	+-+----+-+++--+?-+-----?-	-0.0011	0.0142
305686	rs11164253	a	t	95454	-0.167	0.8674	-	+--+-+--++----------++++-	-0.0017	0.0053
305687	rs11164254	a	t	92095	-0.123	0.9018	-	+-+----++--+--+?-+-------	-0.0052	0.0142
305688	rs11164255	a	g	95454	1.331	0.1831	+	-++++++------+--+-+++++++	0.0148	0.01
305689	rs11164269	t	c	2368	-0.262	0.7933	-	?????????????????-??-+???	-0.0242	0.1234
305690	rs11164270	a	t	95454	-1.83	0.06718	-	+----+--+++-+-+-+-----++-	-0.0231	0.0125
305691	rs11164272	t	g	2368	0.445	0.6562	+	?????????????????+??+-???	0.0481	0.1266
305692	rs11164273	t	c	95454	0.664	0.5065	+	-+++++-+---+++----++++--+	0.007	0.0125
305693	rs11164274	a	g	2368	-0.548	0.5838	-	?????????????????-??-+???	-0.0574	0.1277
305694	rs11164278	t	c	95454	-0.51	0.6097	-	-+-++--+---+-+----++-++--	-0.0023	0.0053
305695	rs11164279	t	c	95454	-0.265	0.7906	-	-++++--+---++-----++-++--	5e-04	0.0054
305696	rs11164280	a	g	95454	0.001	0.9995	+	++++-++-+-+-------+-+----	-0.0034	0.0117
305697	rs11164282	t	g	95443	-0.203	0.8388	-	+---++---+---+-++--+---++	-0.0015	0.007
305698	rs11164283	t	g	95454	-0.275	0.783	-	+---++---+---+-++--+---++	-0.0021	0.007
305699	rs11164287	t	c	95454	-0.346	0.7291	-	+---++--++---+-++--+---+-	-0.0041	0.008
305700	rs11164290	a	c	95454	-0.575	0.5655	-	+----+----+--+-+-+-+++-++	-0.005	0.0056
305701	rs11164294	a	g	95454	1.046	0.2956	+	+++++-+++-+++-+---+-+++--	0.0062	0.008
305702	rs11164295	a	t	95454	1.437	0.1508	+	++++--++--+++-+-+-+-+++--	0.0087	0.0075
305703	rs11164296	a	c	95427	1.01	0.3126	+	++++--+++-+++-+-+-+-+++--	0.0065	0.0075
305704	rs11164299	a	t	95454	1.071	0.2843	+	-++++--+++-++-+-+-+---+-+	0.0069	0.0055
305705	rs11164300	a	g	91293	-0.422	0.6729	-	+----+--++---+-+++?+---+-	-0.0049	0.0094
305706	rs11164301	a	g	95454	0.401	0.6882	+	--+++---++--++-++-+---+--	0.0048	0.0067
305707	rs11164304	t	c	94704	0.169	0.8656	+	++---++-+++--+++-+--+--+?	-0.0012	0.0053
305708	rs11164306	t	g	91281	0.578	0.5632	+	++-++++-+-+-++-++-?+-----	0.0031	0.0063
305709	rs11164308	a	c	89898	0.775	0.4386	+	+---++++-+?-+++--+?-+---+	0.005	0.0083
305710	rs11164310	a	c	73469	-0.056	0.9553	-	+?---+-+-----+??-+?++-+--	-0.0085	0.0216
305711	rs11164314	t	c	48171	-0.434	0.6644	-	++??-??????-?-?????-?????	-0.02	0.0436
305712	rs11164315	a	g	95324	0.594	0.5525	+	-+--+-+--+-++++--+++++--+	0.0042	0.0077
305713	rs11164318	t	c	95454	-0.593	0.5531	-	+-++-+-++-+----++-----++-	-0.0044	0.0078
305714	rs11164320	a	g	95454	-0.569	0.5694	-	--++--+++-++-------+----+	-0.0023	0.006
305715	rs11164334	t	c	95454	0.779	0.4362	+	+++--+-+-+--++++++----+++	0.0035	0.0053
305716	rs11164337	t	c	33706	-0.41	0.6822	-	?????++?+-?--???-???++???	-0.0066	0.0168
305717	rs11164339	t	g	82634	-0.791	0.4292	-	--?---++--+-?-+?++--++-+?	-0.0131	0.0149
305718	rs1116434	a	c	93999	0.174	0.8621	+	-+++++---++--++-+-+--++--	0.001	0.0067
305719	rs11164341	a	c	95454	-0.513	0.6079	-	-+-++-+++---++----+---+-+	-0.0019	0.0053
305720	rs1116435	a	g	95454	1.64	0.1009	+	+++++++++---+--+--+-++-++	0.0103	0.0062
305721	rs11164351	t	c	92310	-0.191	0.8486	-	--+++-------++++---+++-?-	-0.0015	0.0059
305722	rs11164352	a	g	92503	0.281	0.7787	+	++-+-+--++++----+++---+?+	0.0017	0.0057
305723	rs11164354	a	g	95240	0.431	0.6666	+	++---+++++++----+++---+++	0.0025	0.0058
305724	rs11164357	a	g	92503	0.269	0.7882	+	++-+-+--++++----+++---+?+	0.0015	0.0057
305725	rs11164360	t	c	91293	0.42	0.6745	+	++---+--+--++-++++?---+++	0.0036	0.0091
305726	rs1116437	a	g	10103	0.074	0.9413	+	?????????????-??????+-???	0.0024	0.0197
305727	rs11164374	a	g	95454	-0.1	0.9201	-	+------+++-++---+++++-++-	-0.0013	0.0052
305728	rs11164375	t	c	95454	-0.812	0.4168	-	+---+-++--+-----+-+-++-+-	-0.005	0.006
305729	rs11164378	c	g	87657	-0.531	0.5954	-	-?-++++-+++---+++--+---+-	-0.0015	0.0056
305730	rs1116438	t	c	95454	-0.031	0.9757	-	+---+++-+--+++------+-++-	-5e-04	0.0062
305731	rs11164385	a	g	10104	0.304	0.7608	+	?????????????+??????+-???	0.0054	0.0231
305732	rs11164389	t	c	95454	-0.135	0.8925	-	+---+-++-+++-+--+++++-++-	-0.0025	0.0069
305733	rs1116439	t	c	87633	0.03	0.9763	+	+?++++++-++-+++++--------	-1e-04	0.0065
305734	rs11164390	t	c	95454	0.029	0.9769	+	-+++-+--+---+-++-----+--+	0.0018	0.0069
305735	rs11164391	t	c	95454	-0.423	0.6724	-	+--++-+---+--+-++---+--+-	-0.0029	0.0058
305736	rs11164392	t	c	95363	0.229	0.8193	+	-+++-+-++---+-++-----+--+	0.0032	0.0069
305737	rs11164396	a	g	95454	-0.165	0.8692	-	+-+----+---+++---++--++-+	-0.0016	0.0054
305738	rs11164402	a	g	92503	-0.128	0.8985	-	+-+----+---+++---++--++?+	-0.0015	0.0054
305739	rs11164403	c	g	95454	0.12	0.9043	+	-+---+++++++--+++--++--+-	0.0017	0.0052
305740	rs11164404	a	t	93840	0.366	0.7144	+	++--++--+++-?-+++------+-	0.0024	0.0053
305741	rs11164405	t	c	95454	-0.045	0.964	-	-++++-+-----++++-++--++-+	0	0.0064
305742	rs11164408	a	t	93737	0.075	0.9401	+	--++?+++----+++-++-++++--	0.0026	0.0136
305743	rs11164409	a	g	92484	-0.693	0.4884	-	------+++++---+---+++++?-	-0.0029	0.006
305744	rs11164410	t	c	95454	0.258	0.7962	+	+-+-++-+---++----+++-++-+	0.001	0.0053
305745	rs11164417	t	c	87714	-0.298	0.7653	-	+?-+----+++---+---+-++-+-	-0.0028	0.0058
305746	rs11164418	t	g	95452	0.129	0.8971	+	+-+-++-+---+++---+++--+-+	1e-04	0.0053
305747	rs11164427	a	t	95454	0.357	0.7209	+	+---++--+-++++-+++-----+-	-4e-04	0.0129
305748	rs11164428	c	g	95454	0.129	0.8972	+	----++-++++-+-++++--+--+-	9e-04	0.0053
305749	rs11164432	a	g	44537	-0.011	0.991	-	?++-??++????+-++?-??-?-??	0.0045	0.0385
305750	rs11164435	t	c	47544	-0.072	0.9426	-	---+?---????--??++?++?+??	5e-04	0.0373
305751	rs11164436	t	c	28896	1.115	0.2649	+	??-+???-?????+???+??+?+??	0.0497	0.0499
305752	rs11164437	t	c	39112	-0.435	0.6634	-	+++-???+?????-???-??-?-??	-0.0236	0.0432
305753	rs11164438	c	g	31382	1.047	0.2953	+	-?-+???-?????+???+??+?+??	0.061	0.0507
305754	rs11164444	t	c	24304	-0.547	0.5846	-	+?+????+?????-???-??-?-??	-0.0405	0.0567
305755	rs11164466	t	c	24304	0.569	0.5695	+	-?-????-?????+???+??+?+??	0.0418	0.0562
305756	rs11164471	a	c	24304	-0.561	0.5748	-	+?+????+?????-???-??-?-??	-0.0418	0.0562
305757	rs11164472	t	c	24304	0.57	0.5684	+	-?-????-?????+???+??+?+??	0.0424	0.0561
305758	rs11164473	a	g	95447	-1.091	0.2754	-	-++-+-+--+--+-+---+--+---	-0.0059	0.0055
305759	rs11164474	a	c	27386	0.048	0.9614	+	-?-????-?????+?-?+??+?+??	0.0188	0.0536
305760	rs11164475	t	c	27386	0.045	0.9638	+	-?-????-?????+?-?+??+?+??	0.0187	0.0536
305761	rs11164477	t	c	92503	-0.984	0.3249	-	+-+-+++--+--+-+---+--+-?-	-0.0063	0.006
305762	rs11164478	a	g	24719	0.651	0.5152	+	-?-????-?????+???+??+++??	0.0515	0.0559
305763	rs11164479	a	g	24304	-0.575	0.5655	-	+?+????+?????-???-??-?-??	-0.0476	0.0564
305764	rs1116448	a	g	95446	0.269	0.7877	+	-+--+-++++-+--+--+--++-++	0.0026	0.0056
305765	rs11164480	t	c	87256	-0.062	0.9505	-	++++--++++---++?--++-+-++	-0.0016	0.0166
305766	rs11164481	t	c	87256	0.348	0.7277	+	----++----++++-?++--+-+--	0.0071	0.0154
305767	rs11164482	t	c	87256	-0.089	0.9291	-	++++--++++----+?--++-+-++	-0.002	0.0165
305768	rs11164483	a	g	87256	-0.06	0.9524	-	++++--++++----+?--++-+-++	-0.0016	0.0165
305769	rs11164484	t	c	24304	0.581	0.5609	+	-?-????-?????+???+??+?+??	0.0482	0.0559
305770	rs11164485	a	g	95454	-1.218	0.2231	-	-++-+-+-++--+-----+--+---	-0.0064	0.0058
305771	rs11164488	t	c	24444	-0.611	0.541	-	+?+????+?????-???-??-?-??	-0.0506	0.0568
305772	rs1116449	t	c	95454	-0.058	0.9541	-	++-++++---+--++----+++-+-	-0.001	0.0059
305773	rs11164490	a	t	84305	-0.182	0.8558	-	-+++----++-++--?-----++?-	0.0014	0.0122
305774	rs11164491	t	c	85383	0.182	0.8554	+	----++----+++-??++--+-+--	0.0031	0.0168
305775	rs11164492	t	c	85417	-0.545	0.5855	-	++++--++-++--+??--+--++++	-0.0093	0.0163
305776	rs11164493	a	g	85417	-0.119	0.9052	-	++++--++++---+??--++-+-++	-0.002	0.0168
305777	rs11164494	t	c	85417	0.107	0.9151	+	----++----+++-??++--+-+--	0.0018	0.0168
305778	rs11164495	t	g	85417	-0.119	0.9052	-	++++--++++---+??--++-+-++	-0.002	0.0168
305779	rs11164496	a	t	85417	0.037	0.9706	+	-+++----++-++-??-----+++-	0.0033	0.0121
305780	rs11164498	t	c	82466	-0.058	0.9535	-	+---+++++-+--+??+++++--?+	-0.0036	0.0122
305781	rs11164499	a	t	95454	0.221	0.8249	+	-+++--++++-+-+----+--+++-	0.0031	0.0095
305782	rs11164517	a	c	2332	-0.221	0.8254	-	????????????????????+-???	-0.0155	0.068
305783	rs11164521	c	g	93615	-1.388	0.165	-	--+--+-++-----?+-+++--++-	-0.0205	0.0167
305784	rs11164526	t	c	95454	-0.621	0.5349	-	+-----+-+---+++-+++--+--+	-0.0075	0.0099
305785	rs11164530	c	g	95454	0.555	0.5789	+	+-+-----++-+-+++--++++---	0.0016	0.0076
305786	rs11164538	a	g	95454	-0.536	0.5921	-	+++--+++-++-+-++++----+-+	-0.0038	0.0094
305787	rs11164544	a	g	95454	0.032	0.9742	+	---+-+--+--++-----+-+--++	0	0.0058
305788	rs11164553	t	c	95454	0.401	0.6885	+	-+-+-+--+-+-+--+++--++-++	0.0028	0.0053
305789	rs11164555	c	g	95395	-0.236	0.8136	-	+-+-+-++-+-+-++---++-----	-0.0021	0.0052
305790	rs11164556	a	g	95454	-0.119	0.9054	-	-+--+-++++--++++++---+-++	-5e-04	0.0071
305791	rs11164559	t	g	95454	-0.034	0.9727	-	+-+-+-++-+-+-++---++-+---	-0.0011	0.0052
305792	rs11164560	t	c	95454	-0.566	0.5712	-	--+++---+--+-+----+++---+	-0.0067	0.0091
305793	rs11164561	c	g	87682	-0.515	0.6065	-	+?+-+-++-+---++----+--+--	-0.0035	0.0056
305794	rs11164562	t	g	95454	-0.714	0.4755	-	-+-----+++--+-++++---+-+-	-0.0043	0.0068
305795	rs11164564	t	g	95386	-0.105	0.9168	-	+++-+-++-++--++---+------	-0.001	0.0054
305796	rs11164565	c	g	95454	-0.516	0.6056	-	----+---+---++-++++--+-++	-0.0085	0.0112
305797	rs11164569	t	c	95454	-0.041	0.9674	-	+-+++-+--+---++---+--++--	-0.0011	0.0053
305798	rs11164570	t	c	95454	0.355	0.7229	+	+-+-----+--++--++-++++++-	0.0017	0.008
305799	rs11164580	a	g	95454	0.362	0.7175	+	+++-+-++-++--++----+-++--	0.0015	0.0055
305800	rs11164585	t	c	95454	-1.822	0.06841	-	--------+---+--++++----+-	-0.0182	0.0091
305801	rs11164588	a	g	95454	-1.275	0.2022	-	---+-+--+---+--++++-+--++	-0.0075	0.006
305802	rs11164593	a	c	10117	1.757	0.0789	+	?????????????+??????++???	0.0434	0.0229
305803	rs11164597	t	c	92453	0.716	0.474	+	---+++++-+-+-+---++---+?+	0.0045	0.0067
305804	rs11164602	t	c	95454	-0.427	0.6695	-	+++-----+-+-+-+++--+++-+-	-0.003	0.0067
305805	rs11164603	a	t	95454	-0.479	0.6317	-	+++--+--+-+-+-+++--0++-++	-0.0031	0.0052
305806	rs11164607	a	c	95254	-3.765	0.0001665	-	--+------+-+------++-----	-0.0202	0.0053
305807	rs11164608	t	c	95454	3.763	0.000168	+	++-+++-++-+-++++++--+++++	0.0202	0.0053
305808	rs11164611	a	g	95454	-0.168	0.8669	-	+-+-----+---+-++--++++++-	-0.0016	0.0087
305809	rs11164616	t	c	95429	-0.333	0.7394	-	++---+--+-+-+--++--+++-++	-0.0021	0.0053
305810	rs11164621	t	c	95454	-0.457	0.6474	-	+++-++++--+-+++++------+-	-0.0034	0.0093
305811	rs11164623	t	g	93688	-0.175	0.8611	-	+++-++++--+-?++++----+-+-	-7e-04	0.0093
305812	rs11164624	t	c	95454	-0.49	0.6242	-	---+++-+++--++++-+-+-----	-0.0063	0.0149
305813	rs11164630	t	c	95454	0.482	0.6301	+	----++-+-+-+-+---+++--+--	0.0028	0.0053
305814	rs11164634	a	g	10078	-1.44	0.15	-	?????????????-??????--???	-0.0604	0.0329
305815	rs11164636	a	c	95454	0.742	0.4578	+	++++--+---+----++-+-++-++	0.0035	0.007
305816	rs11164640	a	g	94704	-0.283	0.7775	-	+++-++++--+-++-++--+---+?	-0.0016	0.0092
305817	rs11164643	t	c	95454	0.239	0.8109	+	++++---+--+-+--++---+--++	4e-04	0.0094
305818	rs11164647	t	c	95454	0.339	0.7349	+	++++----++-+------+-+-+-+	0.0069	0.0143
305819	rs11164648	a	g	92481	2.214	0.02683	+	+++-+--+-+-+-+--+++++-+?-	0.0123	0.006
305820	rs11164649	t	g	92503	-1.626	0.104	-	--++-++-+-+-+-+------+-?+	-0.0087	0.0056
305821	rs11164653	t	c	95454	-1.598	0.11	-	+-++-++-+-+-+-+--++-++-++	-0.0085	0.0053
305822	rs11164658	t	g	92372	0.822	0.411	+	+++-++-+-+-+-+-?+--++-++-	0.0051	0.0062
305823	rs11164661	a	g	10083	-1.383	0.1666	-	?????????????-??????-+???	-0.0266	0.0193
305824	rs11164662	c	g	95454	-1.329	0.1838	-	+-++-++-+-+-+-++++---+-++	-0.0073	0.0053
305825	rs11164663	a	c	95454	1.55	0.121	+	+--++-++++-++++--++++++-+	0.0151	0.0097
305826	rs11164665	a	g	95454	1.883	0.05969	+	+++++--+-+-+-+--+-+++-+--	0.0095	0.0052
305827	rs11164668	a	g	95454	1.77	0.07679	+	+++++--+-+-+-+--+-+++-+--	0.0088	0.0052
305828	rs11164669	t	c	95454	-1.789	0.07369	-	-----++-+-+-+-++-+---+-++	-0.0089	0.0052
305829	rs11164672	t	c	95454	1.951	0.051	+	+++++--+++-+-+--+-+++-+--	0.0096	0.0053
305830	rs11164673	a	c	95454	1.368	0.1713	+	+++-+--+-+-+-+----+++++--	0.0069	0.0052
305831	rs11164676	a	g	95454	1.471	0.1412	+	+++++-+--+-+-+--+--+--+-+	0.008	0.0056
305832	rs11164677	a	g	88499	0.839	0.4014	+	-+++++---+++++?++-++----+	0.0173	0.0184
305833	rs11164678	a	g	88499	-0.922	0.3565	-	+-----+++-----?--+--++++-	-0.0185	0.0184
305834	rs11164680	a	c	92372	0.019	0.9848	+	-+++-+---++++-+?+-++----+	0.0017	0.0162
305835	rs11164681	t	g	92372	0.454	0.6496	+	-+++-+---++++-+?+-++----+	0.0116	0.0175
305836	rs11164682	a	g	95430	-0.037	0.9702	-	-+++-+---++++-+++-++----+	-0.0033	0.0146
305837	rs11164683	a	g	95454	1.541	0.1234	+	+++++-+--+-+-+--+--+--+-+	0.0081	0.0056
305838	rs11164689	t	g	95454	0.778	0.4365	+	-+++++---++++-+++-++----+	0.0161	0.0178
305839	rs11164695	a	c	95454	1.4	0.1616	+	-++++-+-++-+-+--+++++---+	0.0118	0.0089
305840	rs11164697	a	g	95454	1.371	0.1704	+	-++++-+-++-+-+--+++++---+	0.0117	0.009
305841	rs11164698	a	g	95454	-1.066	0.2865	-	++---+++--+-----+--+---++	-0.0092	0.0092
305842	rs1116470	t	c	95454	1.057	0.2907	+	-+++++---+++-+-++----+-+-	0.0061	0.0052
305843	rs11164701	t	c	95454	-0.684	0.494	-	--++-++-+-+-+-++-++-++-++	-0.0035	0.0052
305844	rs11164702	a	g	95454	0.657	0.511	+	++--+--+-+-+-+--+--+--+--	0.0034	0.0052
305845	rs11164703	a	t	95454	0.99	0.3222	+	--+++--+++--+++--++-+++--	0.0106	0.0105
305846	rs11164718	t	c	10121	0.249	0.8037	+	?????????????-??????++???	0.0449	0.0734
305847	rs11164719	t	c	95454	1.099	0.2716	+	+++-+--+-+-+-+--+-+++++--	0.0054	0.0051
305848	rs11164720	t	c	95454	0.526	0.5986	+	++--+--+-+-+-+--+--+--+--	0.0028	0.0052
305849	rs11164721	t	c	92503	-0.646	0.5182	-	--++-++-+-+-+-++-++-+--?+	-0.0035	0.0053
305850	rs11164732	a	g	95454	0.511	0.6094	+	++--+--+-+-+-+--+--+--+--	0.0027	0.0052
305851	rs11164740	t	c	95454	0.84	0.4012	+	++++-++-+-+++--+++--+-+++	0.0041	0.0063
305852	rs11164741	a	g	95454	-0.992	0.321	-	+-+--++-+-+-+--+++---+-++	-0.0051	0.0052
305853	rs11164749	a	g	58093	0.186	0.8527	+	-??--+??+++-?-??++?+??-+-	0.0034	0.0289
305854	rs11164767	a	g	95454	0.732	0.4644	+	--+++-++++-++++--++--++--	0.0043	0.0064
305855	rs11164769	t	c	95454	1.26	0.2077	+	++-++-+++-++++-++---+-+++	0.0073	0.0079
305856	rs11164774	t	c	95411	0.421	0.674	+	++++--++-+----++---+-+--+	0.0023	0.0052
305857	rs11164778	t	c	92503	-4.48	7.463e-06	-	--+---+---+-----+--++-+?-	-0.0375	0.0086
305858	rs11164779	t	c	95454	-0.25	0.8023	-	-+---++------++----+++--+	2e-04	0.0059
305859	rs11164791	t	c	95454	4.099	4.155e-05	+	++-+++-++-+-++++++--+++++	0.0221	0.0053
305860	rs11164796	t	c	95454	4.098	4.17e-05	+	++-+++-++++-++++++--+++++	0.0219	0.0053
305861	rs11164798	a	t	10107	-2.451	0.01424	-	?????????????-??????++???	-0.0374	0.0156
305862	rs11164801	a	c	92503	4.479	7.494e-06	+	++-+++-+++++++++--+--+-?+	0.0375	0.0084
305863	rs11164803	a	c	95454	-1.122	0.2617	-	--+----+++-++--+--++---+-	-0.0076	0.0058
305864	rs11164804	a	t	92503	4.468	7.881e-06	+	++-+++-+++++++++-++--+-?+	0.0373	0.0084
305865	rs11164808	a	c	92503	-4.457	8.31e-06	-	--+---+---------+--++-+?-	-0.0372	0.0084
305866	rs11164813	a	g	92503	-4.437	9.101e-06	-	--+---+---------+--++-+?-	-0.0371	0.0086
305867	rs11164814	a	g	95454	1.012	0.3115	+	+++++++---+--++-++--+++-+	0.0067	0.0059
305868	rs11164815	t	c	95454	0.837	0.4028	+	++-++++-++---+++---+-++--	0.007	0.0077
305869	rs11164820	a	g	95427	-0.939	0.3476	-	---+----++-++--+--++---+-	-0.0054	0.0059
305870	rs11164827	a	t	95454	-1.032	0.3021	-	+-+++-++--++------++-----	-0.0058	0.0053
305871	rs11164835	a	g	95438	-2.76	0.00578	-	--+-+------++--++-+++----	-0.0138	0.0053
305872	rs11164836	t	c	95454	-2.696	0.007013	-	--+-+------++--++-+++----	-0.0134	0.0053
305873	rs11164838	t	c	95349	1.148	0.2511	+	-+--++--++--++++++--+++++	0.0064	0.0052
305874	rs11164839	a	g	95454	-0.74	0.4591	-	--+----+--+++---+++-+--++	-0.0065	0.0078
305875	rs11164843	a	c	92503	2.576	0.01	+	++-+-++++++-+++--+---++?+	0.0128	0.0054
305876	rs11164844	a	c	95454	-2.566	0.01028	-	--+-+------+---++-+++----	-0.0127	0.0053
305877	rs11164845	a	g	95454	2.657	0.00789	+	++-+-++++++-+++--+---++++	0.013	0.0053
305878	rs11164850	t	c	95445	1.672	0.09446	+	++-+--++--+--++--+---+---	0.0099	0.007
305879	rs11164851	a	g	95428	1.687	0.09168	+	++-+--++--+--++--+---+---	0.0098	0.007
305880	rs11164854	t	c	95454	1.727	0.08413	+	++-+-+++--+--++--+---+-+-	0.0103	0.0071
305881	rs11164855	t	c	95454	1.715	0.08636	+	++-+++-+++---++-++--+++++	0.0088	0.0053
305882	rs11164857	t	c	95454	1.805	0.07109	+	++++++-+--++-+++++-++--++	0.0157	0.0088
305883	rs1116486	c	g	92503	-0.461	0.6445	-	---+-+-+-+-+-+--++-++--?-	-0.0023	0.0052
305884	rs11164862	t	c	95306	1.23	0.2186	+	---+++-++--+-+-++-++--+-+	0.0082	0.0078
305885	rs11164865	t	c	95454	-1.087	0.2772	-	+++---+--++---+--+--+--+-	-0.0072	0.0078
305886	rs11164867	c	g	95412	-0.107	0.9146	-	-++---++++----+++---+-++-	0.001	0.0089
305887	rs11164869	c	g	95454	2.811	0.004935	+	+---+-+--+++-+-+++--+-+++	0.0168	0.0067
305888	rs11164870	c	g	95454	3.14	0.001687	+	+--+++--+--++++-+++++-+++	0.0154	0.0054
305889	rs11164872	t	c	1839	-0.347	0.7289	-	??????????????-??????????	-0.0169	0.0484
305890	rs11164879	a	g	92503	-2.564	0.01035	-	-++---++-++---++-------?-	-0.0132	0.0055
305891	rs1116488	a	c	92377	-1.285	0.199	-	+------+-+-++--+-+++-+-?+	-0.0095	0.0062
305892	rs11164882	a	g	95454	2.065	0.03896	+	++-------+-+-++-+++++++++	0.0125	0.0071
305893	rs11164890	a	g	95198	-2.555	0.01062	-	--++++-+----+--+---------	-0.0144	0.0069
305894	rs11164896	a	c	92503	-0.879	0.3793	-	+-+---+--++-++++----+++?-	-0.0109	0.0094
305895	rs11164897	c	g	92503	-1.226	0.2201	-	-++------++---++--+--++?-	-0.0093	0.007
305896	rs1116490	t	c	95454	-1.752	0.07972	-	+------++++-+-+-+-++--+-+	-0.0105	0.0057
305897	rs11164900	t	c	449	0.303	0.7619	+	?????????????????????+???	0.1014	0.3331
305898	rs11164905	a	g	95454	0.45	0.6525	+	-+-+++-++--+-+--++++--+-+	0.0077	0.0092
305899	rs11164908	a	c	95454	0.97	0.3319	+	---++++++--+++--++-++---+	0.0078	0.007
305900	rs11164909	t	c	95454	0.464	0.6427	+	+-++---+++++----+--+-++++	0.0017	0.0067
305901	rs1116491	t	c	7776	-0.723	0.4699	-	?????????????-???????????	-0.0217	0.0299
305902	rs11164911	t	c	84727	1.913	0.0558	+	++-------+-+-++-+++++++?+	0.0108	0.0071
305903	rs11164915	t	c	95454	-0.653	0.5136	-	---+++--+++-+----++---++-	-0.0044	0.0058
305904	rs11164921	a	c	95454	0.483	0.6292	+	---+++-+---+++--++------+	0.0042	0.0068
305905	rs11164922	a	g	95454	0.372	0.71	+	+-++++++--+-++-+++--+---+	0.0028	0.0089
305906	rs11164928	a	g	95454	0.88	0.3786	+	+-+---+++-++--++---+-+--+	0.0044	0.0052
305907	rs11164929	c	g	95454	0.955	0.3395	+	+-+---+++-++-+++---+-+--+	0.0048	0.0052
305908	rs1116493	a	g	91285	-1.1	0.2714	-	++--+-++++--+-+---?+-++-+	-0.0074	0.0057
305909	rs11164930	t	c	95454	-0.384	0.7011	-	-+------++-+-----+-+-+++-	-0.0026	0.0096
305910	rs11164931	t	g	95385	1.263	0.2065	+	+++++++-+----+-+-++-++++-	0.0164	0.0136
305911	rs11164934	t	c	95454	-0.917	0.3591	-	-+--+++-----+++++++-+----	-0.0055	0.007
305912	rs11164935	a	c	95454	1.275	0.2023	+	+++++++-+-----++--+-++++-	0.0159	0.012
305913	rs11164938	a	g	95396	3.093	0.00198	+	+-++++-+++-+++--+++++-+++	0.0149	0.0053
305914	rs11164939	a	g	93668	-0.145	0.8846	-	+++---+--++-?-++--+-++-++	-0.0041	0.0091
305915	rs11164940	a	t	95380	-0.329	0.7421	-	-+------++-+--+--+-+-+++-	-0.0016	0.0099
305916	rs11164947	a	g	2318	1.017	0.309	+	????????????????????++???	0.032	0.0313
305917	rs1116495	a	c	95454	-2.839	0.004526	-	----++++-+--+---+---+++-+	-0.015	0.0059
305918	rs11164953	t	c	95402	0.253	0.8	+	+----++++-+++-+++--+++---	0.0016	0.0071
305919	rs11164954	a	g	89783	0.799	0.4242	+	---++-+----+++??+-+++--+?	0.0116	0.0168
305920	rs11164955	a	g	95454	-0.544	0.5867	-	++-++++-+-+-++--+---++-++	-0.0035	0.0059
305921	rs11164956	t	c	95454	1.176	0.2396	+	+-++---+---+---++-+++--+-	0.0047	0.0057
305922	rs11164963	a	c	9072	-1.429	0.1531	-	?????????????-???????+???	-0.0365	0.031
305923	rs11164969	t	c	95413	2.115	0.03442	+	+-+++-++--++-+--+++++-+++	0.0118	0.0054
305924	rs11164970	c	g	95454	-0.136	0.8921	-	++-++--+---+-+--------+++	-0.0011	0.0054
305925	rs11164971	t	g	95454	0.462	0.6439	+	++++-++-+-+-+--+++++++-++	0.0029	0.0072
305926	rs11164974	t	c	95454	-0.222	0.8239	-	++-+---+--+--+------+-+++	-0.0014	0.0052
305927	rs11164975	a	g	95454	0.516	0.6056	+	-+++--++--+-++++--+-+-++-	0.0056	0.0112
305928	rs11164976	a	g	95454	-0.429	0.6679	-	+---++--++-+----++-+-+--+	-0.0049	0.0111
305929	rs11164978	t	c	95454	-0.476	0.6342	-	-+++-----+-+--+---+++-++-	-0.0025	0.0065
305930	rs11164979	a	g	92372	0.663	0.5076	+	-+++--++--+-+++?--+-+-++-	0.0063	0.0114
305931	rs11164983	a	g	92372	0.733	0.4635	+	-+++-+++--+-+++?--+-+-++-	0.0081	0.0111
305932	rs11164984	t	c	92372	0.896	0.3704	+	-+++-+++--+-+++?--+-+-++-	0.0097	0.0112
305933	rs11164986	t	g	92372	0.635	0.5257	+	-+++-+++--+-+++?--+-+-++-	0.0068	0.0114
305934	rs11164988	a	g	92359	-0.605	0.5452	-	+---+---++-+---?++-+-+--+	-0.0062	0.0114
305935	rs11164989	t	c	92372	0.755	0.4502	+	-+++-+++--+-+++?--+-+-++-	0.0078	0.0113
305936	rs11164990	a	g	92372	-0.57	0.5688	-	+---+---++-+---?++-+-+--+	-0.0061	0.0111
305937	rs11164991	a	g	92372	0.744	0.4568	+	-+++-+++--+-+++?--+-+-++-	0.0077	0.0113
305938	rs11164992	a	g	92372	0.613	0.5397	+	-+++-+++--+-+++?--+-+-++-	0.0063	0.0114
305939	rs11164994	a	g	89267	-2.236	0.02532	-	--++-+----+-+-+?-------?+	-0.0214	0.0103
305940	rs11164995	c	g	89421	-0.27	0.7874	-	+---+---++-+---?++-+-+-?+	-0.0033	0.0115
305941	rs11164996	a	g	82466	0.068	0.9458	+	+-+++-+-++--+-??+++----?+	-0.0017	0.0203
305942	rs11165	a	t	77433	-0.281	0.7787	-	?-??-+++??+-+--+-+++-+-?-	-0.0023	0.0069
305943	rs11165001	a	g	92503	2.223	0.02625	+	++--+--+++-+-+-+++++++-?+	0.0168	0.0086
305944	rs11165002	a	c	95448	-0.536	0.5918	-	-+++-------+--+---+++-++-	-0.0025	0.0063
305945	rs11165004	t	c	86339	0.731	0.465	+	++++-+++-----+??-++-+-+?-	0.0156	0.0196
305946	rs11165006	a	g	93615	-0.165	0.8692	-	+---+-+-++-+--?++--+-+--+	-5e-04	0.0132
305947	rs11165007	t	c	90664	0.871	0.3839	+	-+++-+++--+--+?--++-+-+?-	0.008	0.0129
305948	rs11165008	t	c	95454	-0.551	0.5815	-	-+++-------+--+---+++-++-	-0.0028	0.0062
305949	rs11165010	a	g	82466	0.101	0.9193	+	+-+++-+-++--+-??+++----?+	-0.001	0.0203
305950	rs11165012	t	c	92503	-2.083	0.03728	-	-----+--++++-------+-+-?-	-0.0138	0.007
305951	rs11165013	a	g	95454	0.43	0.6675	+	+----++++-+-++-+++---+--+	0.0021	0.0064
305952	rs11165022	a	g	92503	-0.505	0.6138	-	++-+--++--+--+-+----+-+?+	-0.0026	0.0052
305953	rs11165026	t	c	95454	-0.04	0.9684	-	++-+--++--+--+-+----+-++-	-7e-04	0.0052
305954	rs11165029	a	c	69467	0.895	0.3706	+	?++-+--+---?++-++-++++--?	0.0212	0.0238
305955	rs11165030	a	c	95326	-1.974	0.04836	-	-----+--+-+-+-+++----+---	-0.0107	0.0054
305956	rs11165034	a	g	95454	0.333	0.7389	+	+--++---+-+-+++++-+++++--	0.0017	0.0071
305957	rs11165039	t	c	92503	0.68	0.4966	+	-++++-++-+-+--++-----++?-	0.0045	0.0054
305958	rs11165042	t	c	95454	0.714	0.4752	+	-+-++-++-+----++-----+++-	0.0048	0.0056
305959	rs11165043	a	g	95454	-0.643	0.5201	-	+-+--+--+-+-++--+++++---+	-0.0052	0.0063
305960	rs11165044	a	g	92503	0.473	0.6364	+	-+-++-++-+----++------+?-	0.0038	0.0056
305961	rs11165047	a	g	94641	0.697	0.4858	+	-+-++-++-+----++------++?	0.0046	0.0055
305962	rs11165048	a	g	94664	0.878	0.3798	+	-+-++-++-+---+++------++?	0.0057	0.0055
305963	rs11165057	t	g	95439	1.85	0.06437	+	+++-+--+-++++-+-++--+-+++	0.0227	0.0113
305964	rs11165058	t	g	95454	1.539	0.1238	+	+++-+--+-++++-+-++--+++++	0.0169	0.0108
305965	rs11165060	t	c	95454	1.4	0.1615	+	+-+-+-++-++++-+-----++++-	0.0128	0.0106
305966	rs11165061	a	g	82910	-0.125	0.9001	-	-+-+-+++++---+-?--?+--++-	0.002	0.0174
305967	rs11165062	a	g	95454	-1.994	0.04612	-	--+-+-+-++--+---+--+--+--	-0.0155	0.0079
305968	rs11165063	c	g	95443	2.037	0.04163	+	-+-+-+-+--++-+++-++-++-++	0.0158	0.0079
305969	rs11165065	a	g	95420	-0.949	0.3428	-	++++++----+---+---++--+-+	-0.006	0.0058
305970	rs11165068	a	g	95454	-1.34	0.1804	-	+--+--------+-+-+++---+--	-0.0073	0.0052
305971	rs11165069	t	c	88211	-1.186	0.2357	-	-++---++--+-++-?-+?+++--+	-0.006	0.0083
305972	rs1116507	t	c	93999	-0.33	0.7417	-	+-+-+++++++---+---+-++-+-	-0.0024	0.0056
305973	rs11165074	a	g	95454	0.2	0.8417	+	-++-+++--+--+-+---++++-++	0.0022	0.0069
305974	rs11165076	t	g	95454	-0.159	0.874	-	++--+-+---++++-+--++-+-+-	-0.0031	0.0062
305975	rs11165081	a	c	95454	1.737	0.08232	+	-+--+++--+-+++-++-++++-++	0.0102	0.0054
305976	rs11165090	t	c	95454	-1.195	0.232	-	++++++-++--------+-------	-0.0067	0.0054
305977	rs11165101	a	c	95454	-1.987	0.04697	-	+-++-+-+--+------+-+-----	-0.011	0.0053
305978	rs11165102	t	g	95454	0.597	0.5503	+	-++-+++-+++++--+++-++++--	0.0069	0.0073
305979	rs11165108	c	g	95454	-1.987	0.04694	-	+-++-+-+--+------+-+-----	-0.0109	0.0053
305980	rs11165110	a	g	95454	-1.963	0.04962	-	+-++-+-+--+------+-+-----	-0.0108	0.0053
305981	rs11165115	a	g	32003	0.529	0.597	+	?+??+-++---?-?+?--?????+-	0.0036	0.0222
305982	rs11165116	t	c	79938	-0.253	0.7999	-	+++-++++-----+??++?--?---	-0.0081	0.0226
305983	rs11165120	a	g	95292	2.885	0.003919	+	-++-+++-++-+++++--+++++++	0.0158	0.0052
305984	rs11165122	a	g	95454	2.169	0.03008	+	-+-++-+-++---++++-++++++-	0.012	0.0053
305985	rs11165132	a	g	92503	-1.889	0.05893	-	+-+--+-+--+++----+-----?+	-0.0106	0.0054
305986	rs11165134	a	t	95454	2.465	0.0137	+	-+---++-++-+++++--+++++++	0.0132	0.0053
305987	rs11165135	t	g	95454	0.105	0.916	+	+----++-+---++---++-+++-+	1e-04	0.0052
305988	rs11165140	a	g	95454	1.459	0.1445	+	-+-+-++-+-++-+--++--++---	0.009	0.0053
305989	rs11165141	a	t	95454	-1.602	0.1091	-	+-+-+--+-+--+-++--++--+++	-0.0099	0.0053
305990	rs11165142	t	c	10075	-0.346	0.729	-	?????????????-??????--???	-0.0173	0.0465
305991	rs11165147	t	c	92465	0.918	0.3588	+	++-+-+---+++---++-+-+++?-	0.0083	0.0102
305992	rs11165149	t	c	95454	-1.137	0.2556	-	--+++--++-++----+--------	-0.0052	0.0052
305993	rs11165155	a	g	92372	1.585	0.113	+	-+---++-+++++++?-+-+-++-+	0.0145	0.0074
305994	rs11165161	t	g	95454	-0.212	0.8324	-	++--++-++--------+++-----	-0.0048	0.009
305995	rs11165173	a	t	1052	-0.141	0.8882	-	????????????????????+-???	-0.01	0.073
305996	rs11165174	a	g	10120	-0.53	0.5961	-	?????????????-??????--???	-0.015	0.0247
305997	rs11165182	a	g	95454	-0.369	0.7122	-	++----+++-+-+-+-----+++--	-0.003	0.0098
305998	rs11165183	a	t	92372	1.623	0.1046	+	++++-+--+++++-+?-+-+-++-+	0.0114	0.0069
305999	rs11165184	a	g	95454	-0.887	0.375	-	++----+-------++----+++-+	-0.0049	0.0053
306000	rs11165185	a	t	95370	0.203	0.8392	+	----++-+-+-+-+++--+-+-+-+	0.0018	0.0074
306001	rs11165186	a	c	95454	-0.18	0.8574	-	-+--++--+-+++++-+--+-+--+	-0.0011	0.0071
306002	rs11165187	t	c	95454	-0.143	0.8864	-	-+--+---+++++++-+-++-+--+	-8e-04	0.0069
306003	rs11165190	a	c	95435	-0.827	0.4085	-	--+-+-+---+-++-+--+-++-+-	-0.0046	0.0059
306004	rs11165191	t	c	95454	-0.956	0.3389	-	--+-+-+---+-++-+----++-+-	-0.0056	0.0059
306005	rs11165192	t	c	95454	-1.295	0.1954	-	+++--+---+--+---+--+----+	-0.0067	0.0053
306006	rs11165194	t	c	2380	0.106	0.9152	+	?????+???????????????????	0.017	0.1585
306007	rs11165198	a	c	95454	-1.293	0.1961	-	++---+---+--+---+--+--+-+	-0.0068	0.0053
306008	rs11165201	t	c	95418	-1.227	0.2199	-	++---+---+--++--+--+--+-+	-0.0065	0.0052
306009	rs11165206	a	g	95454	-1.358	0.1743	-	++---+---+--+---+--+--+-+	-0.007	0.0052
306010	rs11165207	a	c	95454	1.291	0.1968	+	--+++-+++-++-+++-++-++-+-	0.0066	0.0052
306011	rs11165210	t	c	95454	1.324	0.1854	+	++-++++++-+--+-+--+-++++-	0.0064	0.0052
306012	rs11165211	t	c	1839	-0.344	0.7312	-	??????????????-??????????	-0.0162	0.0469
306013	rs11165213	t	g	95454	1.612	0.107	+	++-++++++---++---++-++--+	0.01	0.0081
306014	rs11165218	a	g	95454	0.93	0.3522	+	++-+++-++-+--+-+--+-++++-	0.0045	0.0052
306015	rs11165219	a	t	95454	0.815	0.4153	+	++-++--++-+--+-+-+--++++-	0.0039	0.0052
306016	rs11165221	a	g	95454	-0.869	0.3846	-	--+--++--+-++-+-+-++----+	-0.0043	0.0052
306017	rs11165231	t	c	95437	0.074	0.941	+	-+---+++-+--+--++-++--++-	0.0017	0.0063
306018	rs11165233	c	g	95454	-0.323	0.7468	-	++++++--+-++-++-++--+---+	-0.0033	0.0066
306019	rs11165236	a	g	87654	-1.844	0.06513	-	-?-++---++-------+---+++-	-0.0124	0.007
306020	rs11165241	t	c	38680	-0.228	0.8193	-	?--?+----+??-+??+--+??-+?	-0.0021	0.0084
306021	rs11165248	a	g	95454	1.293	0.1961	+	++---+++++++-+-+--+-+-+--	0.0058	0.0052
306022	rs1116525	t	c	93999	-1.251	0.2108	-	+-+++---++----+-----+-+--	-0.0077	0.0053
306023	rs11165253	a	g	95454	-1.106	0.2686	-	+++-+-+-+++-----++---+---	-0.0077	0.0069
306024	rs11165254	t	c	1839	0.246	0.8059	+	??????????????+??????????	0.0115	0.0466
306025	rs11165262	t	c	95454	-0.401	0.6887	-	--+++-++-++--++------+--+	-0.0021	0.0069
306026	rs11165263	t	c	94704	-0.533	0.5941	-	+++--+++++++---+----+-+-?	-0.004	0.0079
306027	rs11165265	c	g	95238	-0.627	0.531	-	++---++++-++---+----+++--	-0.004	0.0064
306028	rs11165268	c	g	7776	-0.465	0.6423	-	?????????????-???????????	-0.0157	0.0337
306029	rs11165274	a	g	95454	-2.055	0.03987	-	+-----+++++----+-+-------	-0.0194	0.0091
306030	rs11165277	t	c	95450	-0.021	0.9831	-	----+-+-++++++-+++--+++--	0.0011	0.0074
306031	rs11165279	a	g	95454	0.741	0.4587	+	-+---+++-+-++-+-++----+-+	0.006	0.0065
306032	rs11165281	t	g	95454	0.588	0.5564	+	--+-++-+++++-++--+-++++--	0.0045	0.0072
306033	rs11165283	a	g	87724	1.605	0.1084	+	-?++++-++--++-+++--++++-+	0.0184	0.0097
306034	rs11165284	t	c	92490	1.385	0.1662	+	-+-++-++++--+++++--++++?+	0.0138	0.0081
306035	rs11165285	t	c	95454	0.29	0.772	+	++++++--+--+--+---++-+-+-	4e-04	0.0068
306036	rs11165290	a	c	95454	0.381	0.7028	+	++++++--+-----+---++-+-+-	0.0011	0.0068
306037	rs11165293	a	g	95390	-0.692	0.4891	-	-+-+--+-+-++++--------+-+	-0.004	0.0083
306038	rs11165294	t	c	95443	-0.808	0.4189	-	-+-+--+-+-++++-------++-+	-0.005	0.0083
306039	rs11165297	a	t	92443	-0.936	0.3491	-	+-+-++---+++-+---+--+--?-	-0.0071	0.0066
306040	rs1116530	a	c	95441	-0.281	0.7785	-	--+-+-++--+++++----+-----	-0.0019	0.0089
306041	rs11165300	t	g	95454	-0.665	0.5062	-	-----+---++-+++++----+--+	-0.003	0.006
306042	rs11165305	a	g	95454	0.848	0.3966	+	+-+++---++++-+---+-++---+	0.0044	0.0054
306043	rs11165307	a	g	95454	-0.552	0.5808	-	-+---+---+--+++------++-+	-0.0016	0.0052
306044	rs11165313	c	g	95454	0.046	0.9631	+	++---++--+-++-+-++----+-+	7e-04	0.0065
306045	rs11165314	t	g	92295	-0.66	0.509	-	----+-+-+++-+++?+--+-+-++	-0.0086	0.0131
306046	rs11165315	a	g	95448	-1.471	0.1414	-	+-+-+---+-+-+++-+-----++-	-0.015	0.0088
306047	rs11165318	a	g	92372	-0.445	0.6561	-	----+-+++++-+++?+--+-+++-	-0.0065	0.0129
306048	rs11165321	a	g	95454	-1.908	0.05638	-	+-+---+--+++--------+--+-	-0.0133	0.0057
306049	rs11165327	a	c	95454	-0.365	0.7153	-	-++-++--+----+--++---++-+	8e-04	0.0052
306050	rs11165328	a	c	95454	-1.084	0.2783	-	+----++--+----+++-+++--+-	-0.0083	0.006
306051	rs11165331	t	c	95454	0.233	0.8156	+	-++++--+----++---+--+-+--	0.0043	0.0076
306052	rs11165332	a	g	95454	-1.69	0.09098	-	----+++-++----+++--++++-+	-0.0088	0.0064
306053	rs11165333	a	g	95454	-0.585	0.5589	-	----+-++-+--+-+-+--+-+++-	-0.0078	0.0122
306054	rs11165334	a	g	95452	1.485	0.1375	+	++++--+++--+++--++++--+++	0.0071	0.0056
306055	rs11165336	t	c	95454	1.35	0.1769	+	++++--+++--+++--++++--+++	0.0062	0.0056
306056	rs11165338	t	c	95454	1.377	0.1686	+	++++--+++--+++--++++--+++	0.0064	0.0056
306057	rs11165339	t	c	95454	0.049	0.9611	+	++---+---+++--++-+---+-+-	6e-04	0.0089
306058	rs11165345	t	c	95454	-0.291	0.7711	-	+--+--++----+-+-+-+++-++-	-0.0034	0.0052
306059	rs11165346	a	g	95454	0.704	0.4817	+	++++-+--+-++-+-+-+--+---+	0.0082	0.0123
306060	rs11165347	c	g	95454	0.307	0.7586	+	-+-++++++-+----+--++-----	0.0014	0.0059
306061	rs11165348	a	g	95446	0.966	0.3338	+	-++-+++++--+++--+++--++++	0.0093	0.0075
306062	rs1116535	c	g	92477	1.408	0.1591	+	-+-++-----++-+--+--++--?-	0.0077	0.0052
306063	rs11165354	a	c	95454	1.33	0.1836	+	+-+----+++-++-+-++-+--++-	0.0066	0.0053
306064	rs11165356	a	c	92494	1.087	0.277	+	-++-++++---+++--+++--++?+	0.0105	0.0076
306065	rs11165358	a	g	95454	-1.101	0.271	-	+--+-----++---++---+++---	-0.0105	0.0075
306066	rs11165361	t	c	1839	1.094	0.2739	+	??????????????+??????????	0.0511	0.0464
306067	rs11165364	t	c	95454	0.193	0.8469	+	+-+++--++++++--++++---++-	-7e-04	0.0059
306068	rs11165369	t	c	95454	-2.139	0.0324	-	+---+-+---+--++---+-+-+-+	-0.0134	0.0054
306069	rs11165373	a	g	95450	-1.692	0.09066	-	+++----------++--++++---+	-0.0098	0.0052
306070	rs11165375	a	g	95454	1.995	0.04606	+	--++-+-+++-++--+++---+-+-	0.0117	0.0055
306071	rs11165376	a	g	95454	-0.717	0.4736	-	-+-+--+-+-+--+-+--+-+++-+	-0.0033	0.0057
306072	rs11165377	t	c	95454	-0.27	0.7868	-	+-+-++-++--+-----++++-++-	-0.0026	0.0059
306073	rs11165379	a	c	95450	2.059	0.03952	+	-+++-+-+++-++--+++---+-+-	0.0123	0.0056
306074	rs11165383	t	c	95427	2.556	0.01058	+	++++-+++++-++--++----+++-	0.0138	0.0052
306075	rs11165389	t	g	7776	0.404	0.6859	+	?????????????+???????????	0.0089	0.0219
306076	rs1116539	a	g	57522	-0.945	0.3445	-	-+----+----?-+??-+?+-?--+	-0.0157	0.0158
306077	rs11165390	a	g	95437	0.934	0.3503	+	-+++--+++++-+++++-+--+-+-	0.0053	0.0053
306078	rs11165396	t	c	10069	0.305	0.7601	+	?????????????-??????-+???	0.0049	0.0155
306079	rs11165402	t	c	95442	-2.468	0.01359	-	+---++--++-----++--+--++-	-0.0241	0.0093
306080	rs11165403	t	g	95451	2.219	0.02649	+	-+++--++--++-++--+++++--+	0.0219	0.009
306081	rs11165404	t	c	95454	-2.446	0.01444	-	+---++--++-----++--+--++-	-0.0243	0.0093
306082	rs11165405	t	c	95454	2.542	0.01104	+	-+++--++--+++++--++-++--+	0.0255	0.0093
306083	rs11165406	a	g	95434	3.966	7.322e-05	+	-+++-+++++-++--+++---+-+-	0.0216	0.0052
306084	rs11165408	t	c	95454	-2.644	0.008202	-	+---++--++-----++--+--++-	-0.0279	0.0096
306085	rs11165418	c	g	10121	-0.936	0.3495	-	?????????????-??????+-???	-0.0306	0.0326
306086	rs11165419	a	g	95454	1.809	0.07048	+	-+++--++--++--+--+++-+-++	0.0213	0.0108
306087	rs1116542	c	g	92503	-0.433	0.6648	-	+-+++-+--++++---++---+-?-	-0.003	0.0065
306088	rs11165421	a	g	92503	-1.621	0.1051	-	+---+++++-----++----+--?+	-0.0114	0.007
306089	rs11165426	t	c	95454	1.401	0.1611	+	--++++++++-+---+----+-++-	0.0104	0.0067
306090	rs11165433	a	g	95436	-1.543	0.1228	-	---+----++--+---+--+-++--	-0.018	0.0127
306091	rs11165434	t	g	95454	1.478	0.1393	+	--+++--+--++++-++++++--+-	0.0151	0.0099
306092	rs11165438	t	g	95454	-0.854	0.393	-	+------++++-++---++-++--+	-0.0058	0.0063
306093	rs11165441	a	g	95454	-0.249	0.803	-	-+++----+-+++--+--+-+-++-	0.0011	0.0071
306094	rs11165443	t	c	95436	1.137	0.2554	+	+--++-++-+++++++++---+++-	0.0071	0.006
306095	rs11165445	t	g	95454	1.678	0.09333	+	+++++-++---+-+-+-+++-+-+-	0.0094	0.006
306096	rs11165446	a	g	95454	-0.064	0.9493	-	++++--+++-+++--+-+++-+-++	-6e-04	0.0069
306097	rs11165450	a	t	92482	-0.85	0.3951	-	--+--++++++--+-+-++--++?+	-0.0055	0.0086
306098	rs11165452	t	c	95454	-0.332	0.7397	-	++--+-----+-+-+++++++--++	-0.0024	0.0056
306099	rs11165453	a	g	95454	1.353	0.1759	+	+++++-++--++---+-+++++---	0.0074	0.006
306100	rs11165454	t	c	95454	-0.111	0.912	-	+++--++++--+---+-+++-+---	-6e-04	0.0054
306101	rs11165455	a	c	95454	0.191	0.8488	+	+-++-+++---+------++-++--	9e-04	0.0057
306102	rs11165459	t	g	95454	-0.139	0.8897	-	--+--+++-+---+-+--+--++-+	-4e-04	0.0052
306103	rs11165460	t	c	95438	-0.024	0.9809	-	----+---+-+++-++++-++--++	1e-04	0.0054
306104	rs11165461	t	g	95445	-0.068	0.9455	-	+-+--+++-+---+-+--+--++-+	-1e-04	0.0052
306105	rs11165462	t	c	95454	0.275	0.7833	+	-+-++---+-+++-+-++-++----	0.0015	0.0052
306106	rs11165465	c	g	95454	0.232	0.8163	+	-+++-+++++---+-+-++--+---	0.0017	0.0052
306107	rs11165466	a	g	63138	-0.516	0.606	-	?---+-++-++++???-+??++--?	-0.0058	0.0109
306108	rs11165468	t	c	95433	-1.946	0.05163	-	+--+++-+-++-++++---+-+--+	-0.009	0.0052
306109	rs11165469	c	g	95453	2.468	0.01357	+	++++--+----+-+--+-+-+-++-	0.012	0.0055
306110	rs1116547	t	c	95454	-0.125	0.9003	-	-+++++-++-+---++--+-+--+-	-6e-04	0.0075
306111	rs11165471	a	g	95375	0.801	0.4233	+	-+++--+--+-+----+++---++-	0.0056	0.0053
306112	rs11165481	t	c	91293	1.714	0.08652	+	-+-+--+--+-+-+--++?-+-++-	0.0111	0.006
306113	rs11165485	a	t	95454	1.432	0.1521	+	-+-+-++--+-+-+--++--+-++-	0.0092	0.0059
306114	rs11165488	a	t	10422	0.004	0.9969	+	??????+-?+??-????????????	0.0052	0.0675
306115	rs11165489	a	g	95454	0.062	0.9508	+	-++++++-+--++-+--++--+---	0.003	0.0097
306116	rs11165490	t	g	95454	1.103	0.2702	+	-+++++++--+--++-+-+---+++	0.0134	0.0097
306117	rs11165492	t	c	95454	0.345	0.7298	+	----++-++-+++----+++++---	0.0025	0.0052
306118	rs11165493	a	g	95454	-0.813	0.4163	-	--+-++++----+---+--+-+--+	-0.0032	0.0059
306119	rs11165494	a	g	95444	-0.034	0.9732	-	++-+--++-+----+++-----+++	-7e-04	0.0058
306120	rs11165497	t	c	95351	0.682	0.4955	+	-+++++++-++--++++----++-+	0.0079	0.0083
306121	rs11165500	a	g	95454	0.268	0.7885	+	----+---+-+-++-+-++++----	0.0023	0.0071
306122	rs11165503	a	g	95454	0.199	0.842	+	++-+-----+++--++--+-+-+++	-2e-04	0.0053
306123	rs11165504	t	c	95454	-0.46	0.6452	-	++++-+++-+-+--+-+----++++	-0.0038	0.0072
306124	rs11165505	a	t	95454	0.444	0.6567	+	++--+---+-++++-+-+++++-++	0.0015	0.0053
306125	rs11165509	a	g	10093	-1.607	0.108	-	?????????????-??????+-???	-0.0255	0.0156
306126	rs11165510	t	c	95454	-0.21	0.8335	-	--+-+++++-+-++--+--+-+---	1e-04	0.0053
306127	rs11165512	a	g	92396	0.478	0.6328	+	----+---+-+-++-+-++++-+?-	0.0041	0.0072
306128	rs11165517	t	c	92503	-0.817	0.4141	-	--+-++++--+--++-++-+-+-?+	-0.0025	0.0062
306129	rs11165520	t	c	95454	-0.588	0.5564	-	-+-+--++-+----+++--+--+-+	-0.0023	0.0052
306130	rs11165521	a	t	95454	-0.088	0.9302	-	++++-+++-+-+--+-++---++++	-0.0021	0.0075
306131	rs11165529	t	g	95454	-0.338	0.7353	-	+-++-+++-+----+-++---+-++	-0.004	0.0084
306132	rs11165532	a	g	95454	1.792	0.07317	+	+--++-++-+-+++--++++-+--+	0.009	0.0052
306133	rs11165533	a	g	95454	-1.471	0.1412	-	--+-+-+++++---++++-+-+--+	-0.0077	0.0064
306134	rs11165534	a	g	95454	1.353	0.1762	+	++-+-+-----++-----+-+-++-	0.0069	0.0064
306135	rs11165539	t	g	95441	-0.45	0.6529	-	++-++-++-+-++-+++---+----	-0.006	0.0123
306136	rs11165540	a	g	95446	0.725	0.4686	+	--+---+-+-+--+--+++++++++	0.0098	0.0121
306137	rs11165541	a	c	95454	-0.622	0.5341	-	++-+++-+-+-++-++---------	-0.0083	0.0122
306138	rs11165542	a	g	92418	0.46	0.6455	+	--+---+-+-+--+--+++++++?+	0.0073	0.0123
306139	rs11165543	a	g	95429	0.814	0.4157	+	-+++-+-+++++-+--++---++--	0.0078	0.0068
306140	rs11165544	a	g	95454	-0.861	0.3895	-	+-+--++--+---++-++------+	-0.0086	0.0089
306141	rs11165545	a	c	95454	0.959	0.3374	+	-+-++--++-+++--+--++++++-	0.0098	0.009
306142	rs11165546	a	c	95454	-0.258	0.7963	-	+++-++--+++--++-+---+-++-	-0.0014	0.0054
306143	rs11165547	a	g	95454	-0.842	0.3999	-	+-+--++--+---++-++------+	-0.0087	0.009
306144	rs11165555	t	g	95454	-0.851	0.395	-	----++-+--++-----+----++-	-0.0042	0.0057
306145	rs1116556	t	c	93999	-1.166	0.2435	-	-+-++--+-++-+-+-+---+-+--	-0.0065	0.0058
306146	rs1116557	t	c	93999	1.118	0.2637	+	+-+--++-+--+-+-+-+++-+-++	0.0062	0.0058
306147	rs11165578	a	c	95454	-1.175	0.2402	-	+--+--++--+-+---+++--+--+	-0.0069	0.0053
306148	rs11165581	a	g	95454	-1.52	0.1285	-	++--++--+-+--+-++----+--+	-0.0096	0.0068
306149	rs11165583	a	g	95454	1.837	0.06619	+	--++--++-+-++++--++++-++-	0.0117	0.0068
306150	rs11165584	a	g	95454	-1.483	0.1381	-	++--++--+-+--+-++----+--+	-0.0088	0.0066
306151	rs11165585	a	g	95194	1.544	0.1225	+	--++--++-++++++--+++--++-	0.0094	0.0067
306152	rs11165590	t	g	95420	1.54	0.1236	+	--++--++-+-++++--++++-++-	0.0093	0.0067
306153	rs11165592	a	g	92503	-1.293	0.196	-	++--++--+-+--+-++---++-?+	-0.008	0.0068
306154	rs11165593	a	g	92503	-1.464	0.1431	-	++--++--+-+----++---++-?+	-0.0093	0.0068
306155	rs11165594	t	g	95454	2.007	0.04473	+	++-++-++++++++--++-++-+-+	0.0128	0.0064
306156	rs11165595	a	g	95438	0.374	0.7082	+	++-+--++--+-++--++-+-+--+	0.0014	0.0053
306157	rs11165597	c	g	95454	1.412	0.1579	+	--+++-++-+-++-+--+++--++-	0.0087	0.0067
306158	rs11165602	t	c	95454	-1.712	0.08685	-	++---+--+-+--+-++---+++-+	-0.0103	0.0067
306159	rs11165603	a	g	95454	-1.353	0.1761	-	++--++--+-+--+-++---++--+	-0.0074	0.0066
306160	rs11165605	a	g	95454	-1.482	0.1383	-	++--++--+-+-+--++----+--+	-0.0086	0.0067
306161	rs11165613	a	g	95454	-1.238	0.2158	-	++--++--+-+--+-++----+--+	-0.0067	0.0066
306162	rs11165614	t	g	95436	-0.469	0.6389	-	-++--+-++-+-+--++---+++-+	-0.0019	0.0072
306163	rs11165615	a	g	87582	0.467	0.6408	+	-++-++++--++++??+---+-+?+	0.0126	0.0174
306164	rs11165621	a	g	95454	-0.652	0.5143	-	-++-+++---+++---++++-+--+	-0.0036	0.0063
306165	rs11165623	a	g	95454	-0.221	0.8251	-	+--+++-+++++--++------++-	-0.0014	0.0052
306166	rs11165624	t	g	95454	0.461	0.645	+	++-+---+++---+++------++-	0.0026	0.0064
306167	rs11165630	a	g	95454	0.188	0.8512	+	++-+---+++---+++----+-+++	0.0013	0.0063
306168	rs11165631	t	c	32894	1.093	0.2744	+	+??+??????-??+?+????--??-	0.0115	0.0132
306169	rs11165633	a	g	95454	-0.502	0.6154	-	--+-+++---+++---++++++--+	-0.0029	0.0064
306170	rs11165636	a	g	95374	0.537	0.5914	+	++-+---+++---+++------++-	0.0033	0.0064
306171	rs11165643	t	c	95454	-0.535	0.593	-	+--+-+-+-++---++------+--	-0.0029	0.0052
306172	rs11165644	a	c	95454	-0.494	0.6215	-	--+-+++---+++---++++++---	-0.0028	0.0064
306173	rs11165656	a	g	95454	-0.303	0.762	-	--+-+++---+++---++++-+---	-0.0019	0.0064
306174	rs11165657	a	c	95454	0.218	0.8271	+	++-+---+++---+++----+-+++	0.0012	0.0064
306175	rs11165659	c	g	95454	0.848	0.3963	+	+++-+-+-++---++-+++-+--++	0.0041	0.0053
306176	rs11165660	t	g	95428	-0.696	0.4866	-	---+-+-+--+++--+---+-++--	-0.0033	0.0053
306177	rs11165664	t	g	95454	1.535	0.1247	+	+++-+-++--++-++-+++-++--+	0.0076	0.0058
306178	rs11165665	t	c	95454	-1.13	0.2586	-	---+-+-+++-++--+---+---+-	-0.0052	0.0053
306179	rs1116567	c	g	93999	-1.537	0.1242	-	+-+-+--+----++++---++--+-	-0.017	0.0099
306180	rs11165674	a	g	95454	-1.259	0.2081	-	---+-+-+--+-+--+---+-++--	-0.0063	0.0053
306181	rs11165675	a	g	95454	-0.773	0.4393	-	+--+++++--+++--+---+--+--	-0.0042	0.0058
306182	rs11165676	c	g	95440	0.897	0.3697	+	-++---+-++---++-+++-+++++	0.0055	0.0058
306183	rs11165677	c	g	95454	-0.804	0.4217	-	+--+++-+--+++--+---+--+--	-0.0049	0.0058
306184	rs11165679	a	g	95454	-0.566	0.5714	-	+--+--++--+-++--++-+-+---	-0.0038	0.0056
306185	rs11165686	a	g	95454	-0.369	0.7123	-	-+-+-+--+++--+-+++--+-++-	-0.0015	0.0059
306186	rs11165687	t	c	10121	0.462	0.6442	+	?????????????+??????-+???	0.0076	0.0163
306187	rs11165689	t	c	10108	-0.718	0.4727	-	?????????????-??????-+???	-0.0135	0.0201
306188	rs11165690	t	c	95332	-0.832	0.4052	-	+--+-+---+-++-++------+--	-0.0072	0.0067
306189	rs11165691	c	g	95454	-0.109	0.9135	-	++------++-++++++-+-+++-+	-0.0017	0.0051
306190	rs11165698	t	c	95454	-0.493	0.6218	-	---+++-+--+++-++---+--+--	-0.0025	0.0054
306191	rs11165699	a	t	90533	0.691	0.4896	+	++-+++--+++++-??-+++--++-	0.0056	0.0103
306192	rs11165712	t	c	95454	-0.335	0.7373	-	+--+++-+--+++-++---+--+--	-0.0018	0.0054
306193	rs1116572	t	c	95454	-0.319	0.7497	-	--+-+-+-+-+++-++++++-++-+	-0.0012	0.0064
306194	rs11165727	a	g	1125	0.464	0.6425	+	?????????????????+???????	0.115	0.247
306195	rs11165731	a	g	95412	0.554	0.5797	+	---+-+++-+--++++++++---+-	0.0106	0.0129
306196	rs11165732	a	g	95454	0.447	0.6548	+	--++++-+--+++----+++--+--	0.0023	0.0053
306197	rs11165733	t	c	95454	-0.144	0.8855	-	++----+-++---++++---++-++	-6e-04	0.0052
306198	rs1116574	a	g	93999	-0.475	0.6348	-	++-+-++-+-+-+-+++++-+--+-	-0.0045	0.0056
306199	rs11165740	a	g	95436	-0.253	0.8002	-	+-++++-+--+++-----+++-+--	-0.0021	0.0052
306200	rs11165742	a	c	95454	-1.018	0.3088	-	---+---+-+-++---+-+-+-+-+	-0.0105	0.0103
306201	rs11165744	a	g	95451	0.227	0.8203	+	+--++--++++++--++++---++-	-4e-04	0.0059
306202	rs11165745	t	g	95454	-0.054	0.9569	-	---++--+-+-++---+++---+--	6e-04	0.0069
306203	rs11165746	t	g	95330	1.11	0.267	+	--+-+-++++++---+++++++--+	0.0125	0.0092
306204	rs11165747	t	g	1296	0.755	0.45	+	??????????+??????????????	0.1058	0.1393
306205	rs11165751	t	g	95454	0.012	0.9907	+	+++---+-++---++++----+-++	-4e-04	0.0054
306206	rs11165753	t	g	95454	-0.617	0.5373	-	---++----+-++-+-+++--++--	-0.0051	0.0081
306207	rs11165754	t	c	95449	-0.21	0.8333	-	-++---++--+--+-+-+++++--+	0.0013	0.007
306208	rs11165761	a	g	95454	0.436	0.663	+	+++---+--+---++-+-+---++-	0.003	0.0062
306209	rs11165765	t	c	95334	-0.481	0.6303	-	---+++-++--++--+-+-++---+	-0.0033	0.0062
306210	rs11165770	t	c	95454	0.406	0.6849	+	+++---+--+--+++-+-+---++-	0.0027	0.0062
306211	rs11165773	a	g	95423	-0.226	0.8212	-	++--+---++-++++-+---+-++-	-0.0024	0.0071
306212	rs11165775	a	g	86932	0.299	0.7648	+	+?++-----+-++++-+-+---++?	0.0013	0.0105
306213	rs11165778	a	g	95454	-0.263	0.7923	-	-+---++------++-+--+++--+	2e-04	0.0059
306214	rs11165779	t	c	95454	-0.162	0.871	-	----+++++-+----+-+-+++---	5e-04	0.0098
306215	rs1116578	t	c	95454	0.363	0.7168	+	+++++-++--+-+-+-+-+++----	0.0025	0.0155
306216	rs11165781	t	c	95454	0.431	0.6667	+	-+--+-++-++---++-+--+++++	0.0041	0.007
306217	rs11165783	t	c	95454	0.31	0.7564	+	+---+---++-+++-+++----++-	0.0019	0.0058
306218	rs11165784	c	g	95454	0.872	0.383	+	++++-+++--++---++-++-+---	0.005	0.0067
306219	rs11165787	a	g	95454	-0.278	0.7808	-	--+-++-+++-+--++--++-+-+-	-0.0015	0.0058
306220	rs11165789	t	c	95454	0.918	0.3588	+	++++-+++--++----+-++-+---	0.0055	0.0066
306221	rs11165792	a	c	95454	-0.912	0.362	-	+--+-----+--++-+++--+-+++	-0.0083	0.0073
306222	rs11165793	a	g	95454	-0.84	0.4007	-	+--+-----+--++-+++--+-+++	-0.0076	0.0072
306223	rs11165794	t	c	95454	0.952	0.3411	+	-++-+++++-++--+---++-+---	0.0085	0.0073
306224	rs11165798	a	g	95454	-1.214	0.2247	-	+-++-----+--++-+++-----+-	-0.0097	0.0059
306225	rs11165800	a	g	95454	-0.957	0.3386	-	+--+-----+--++-+++--+-+++	-0.0087	0.0071
306226	rs11165802	t	g	685	0.074	0.9408	+	??????????????????????+??	0.0195	0.2613
306227	rs11165805	c	g	92489	0.923	0.3562	+	-++-++++++++--+---++-+-?-	0.0088	0.0073
306228	rs11165810	t	c	16803	0.359	0.7193	+	?????????????+???????????	0.0081	0.0225
306229	rs11165814	a	t	95454	-0.938	0.3483	-	+---++-+----++-+----+++++	-0.0058	0.0055
306230	rs11165816	a	g	95454	-0.548	0.584	-	-+++--++----+----++-+----	-0.0041	0.0096
306231	rs11165817	t	g	95454	0.529	0.5966	+	+---++--++++-++++--+-++++	0.0039	0.0097
306232	rs11165818	a	g	95454	0.36	0.719	+	+---++--++++--+++--+-++++	0.0025	0.0098
306233	rs11165819	t	c	95454	-0.702	0.4827	-	-+++--++----+----++-+----	-0.0053	0.0097
306234	rs11165820	t	c	95454	-0.465	0.6421	-	-+++--++----++---++-+----	-0.0033	0.0098
306235	rs11165821	t	g	95454	-0.606	0.5447	-	-+++--++----+----++-+----	-0.0045	0.0096
306236	rs11165823	t	c	91687	0.748	0.4544	+	--+++++-++-++--?+++--+-++	0.0088	0.0108
306237	rs11165827	a	t	95454	-1.023	0.3063	-	--+--++-+--+-+--+-----+++	-0.0045	0.006
306238	rs11165829	c	g	95454	-0.876	0.381	-	--+--++-+--+-+--+------++	-0.0035	0.0055
306239	rs11165830	a	g	89848	-0.471	0.6376	-	++--+--+--+---??---+-++--	-0.007	0.0145
306240	rs11165837	a	t	95454	0.51	0.6098	+	++-++--+-++-+-+--+-++++--	0.0016	0.0054
306241	rs11165840	a	g	95368	-0.41	0.6819	-	---+--++-+----++--++-++++	-0.0023	0.0074
306242	rs11165842	t	c	95454	-0.253	0.8005	-	+---++-++-+-++--++--+----	-0.0025	0.0064
306243	rs11165845	a	g	95454	-2.138	0.03253	-	+-+++-----+-+-----++--+--	-0.014	0.0057
306244	rs1116585	a	g	85129	0.52	0.6032	+	+--?-++-??-+-+--++-++-+-+	0.0022	0.0065
306245	rs11165851	a	t	7577	-0.808	0.4189	-	??-????--????????????????	-0.0692	0.0926
306246	rs11165854	t	c	988	-0.562	0.5744	-	????????????????????-????	-0.064	0.1134
306247	rs11165861	t	c	95454	-1.288	0.1978	-	+-+-+-+--++--+----+-++---	-0.0102	0.0069
306248	rs11165863	a	g	95454	1.587	0.1124	+	-+-+-+-+++-++-++++-+++++-	0.011	0.0065
306249	rs11165864	t	c	95454	-1.656	0.09768	-	--+++++---++--+---+-----+	-0.0095	0.0057
306250	rs11165867	t	c	95404	-1.405	0.16	-	+-+++-+--++-------++++--+	-0.0111	0.0069
306251	rs11165868	t	c	95454	-1.022	0.307	-	+-+++-+--++-++----++++--+	-0.0088	0.0075
306252	rs11165869	t	c	83382	0.166	0.8683	+	+-?++--+++-+?--?--+-++--+	0.0024	0.0201
306253	rs1116587	a	g	95454	-0.542	0.588	-	-+++----+-++++---+-+-+---	-0.0013	0.0053
306254	rs11165870	t	c	92432	-0.479	0.6318	-	+---+-----+--++-+--++++?+	-0.0036	0.0053
306255	rs11165873	a	t	92503	-0.4	0.6895	-	+---+-----+--++-+--++++?+	-0.0031	0.0052
306256	rs11165874	c	g	95357	-0.168	0.867	-	+-+-+++-+-+--++-----++-++	-0.0023	0.0053
306257	rs11165875	t	c	95454	0.391	0.6956	+	-+++---+-+-++--+++++-++--	0.0035	0.0053
306258	rs11165877	a	g	95454	1.764	0.07775	+	-+-+-++--+--++---+++--+--	0.0105	0.0057
306259	rs11165878	c	g	10102	1.281	0.2002	+	?????????????+??????-+???	0.024	0.0215
306260	rs11165879	a	g	95343	-0.848	0.3963	-	--+++--+---++-+++--+-----	-0.004	0.0054
306261	rs11165880	t	c	94769	-0.677	0.4985	-	-+----+++++-++---++-+--++	-0.0043	0.0078
306262	rs11165881	t	c	95454	0.745	0.4563	+	-+---++--++-++---++-+++++	0.0041	0.0055
306263	rs11165882	a	c	95454	1.135	0.2565	+	+++++--++---++-++++-++---	0.0059	0.0058
306264	rs11165886	t	c	95454	0.624	0.5325	+	+-++++-++++-++-++++++-+-+	0.0031	0.0057
306265	rs11165887	a	g	95365	0.62	0.5351	+	+-+++--++++-++-++++++-+-+	0.003	0.0057
306266	rs11165888	a	g	95454	0.039	0.969	+	-+--+-+++-+-+++----+++---	0.0019	0.0086
306267	rs11165889	a	t	95454	-0.44	0.6602	-	-+---++----+--+------+-+-	-0.0021	0.0058
306268	rs11165895	a	c	95454	0.107	0.9146	+	-----+++--+++----++--+++-	6e-04	0.0074
306269	rs11165897	t	c	95454	0.242	0.8088	+	-+---+++--++-+-+-++--++++	0.0021	0.0078
306270	rs11165906	a	t	90532	-1.696	0.08997	-	-++----+---+--??-+--+---+	-0.0116	0.007
306271	rs11165908	a	g	95454	0.323	0.7468	+	++-+-++-+-+----+--+--++++	6e-04	0.0063
306272	rs11165911	t	c	95454	-0.178	0.859	-	--++--+--+----++--++-++++	-1e-04	0.0074
306273	rs11165920	a	g	92503	-0.289	0.7727	-	+-++--++-++--+---+++++-?+	-0.0023	0.0063
306274	rs11165921	t	g	92503	-0.425	0.6712	-	+-++--++-++--+---+++++-?+	-0.0034	0.0063
306275	rs11165922	t	g	95454	-0.649	0.5164	-	-+-+----+----+-++-----+--	-0.003	0.0059
306276	rs11165924	a	g	92372	0.691	0.4897	+	+++--+-++++-+-+?--+---+-+	0.0014	0.0062
306277	rs11165934	a	c	95454	-1.348	0.1778	-	+-++--++-++----+-+-+-+-+-	-0.0089	0.0062
306278	rs11165935	a	g	95454	1.831	0.06704	+	-+-+-+--+--++++++-+-+-+-+	0.0126	0.0069
306279	rs11165937	a	t	95454	1.763	0.0779	+	-+-+-+--+--++++++-+-+-+-+	0.0123	0.0069
306280	rs11165939	t	c	95440	1.387	0.1655	+	-+---+--+--++++-+-+-+-+-+	0.0091	0.0062
306281	rs11165944	t	c	91293	-0.859	0.3906	-	+-+-++-+-++-+-+---?-+-+--	-0.0066	0.0057
306282	rs11165947	t	c	95379	-0.342	0.7321	-	--++-++--+-+--+---++-+++-	-7e-04	0.0064
306283	rs11165950	t	c	95454	0.348	0.7282	+	+--++--+-+---+-++--++-+-+	0.0014	0.0092
306284	rs11165951	a	c	95454	-0.769	0.4419	-	-+-------+-++-+--++-++-+-	-0.0048	0.0079
306285	rs11165952	a	g	95454	0.761	0.4467	+	+-+++++++-+--+-++--+--+-+	0.0051	0.0079
306286	rs11165953	t	c	95454	0.863	0.3883	+	+-+++++++-+--+-++--+--+-+	0.0061	0.0079
306287	rs11165954	a	g	95454	0.776	0.4377	+	+-+++++++-+--+-++--+--+-+	0.0051	0.0079
306288	rs11165956	t	c	95454	-0.811	0.4176	-	-+-------+-++-+--++-++-+-	-0.0054	0.0079
306289	rs11165958	t	c	95454	0.764	0.4446	+	+-+++++++-+--+-++--+--+-+	0.0052	0.008
306290	rs1116596	t	c	95454	-0.281	0.779	-	+-+-+-+----+-+-+-+-+--+--	-0.0019	0.0055
306291	rs11165964	t	c	95454	0.332	0.7395	+	+-+++-++-++--+-+++-+-+-++	0.0024	0.0073
306292	rs11165968	a	g	91293	-1.468	0.142	-	+---++--+++++-+---?------	-0.0081	0.0055
306293	rs11165972	t	g	92322	-1.534	0.1251	-	-+-----++---+++?---+-+-++	-0.0077	0.008
306294	rs11165973	a	g	2749	-1.077	0.2817	-	??????-???-??????????????	-0.1307	0.1247
306295	rs11165975	a	c	91717	0.329	0.7419	+	+-+--+-+-+?++++--+++??-++	0.0041	0.014
306296	rs11165976	t	c	91293	-1.232	0.2179	-	++---++---+-+---+-?-+----	-0.0086	0.0057
306297	rs11165977	a	g	95454	-0.065	0.9485	-	++-+-+---+-----++++--+---	-0.0021	0.0067
306298	rs11165979	t	c	95454	0.147	0.8832	+	--++--+-+-+++++----++++++	0.0022	0.0082
306299	rs1116598	a	g	95454	0.244	0.8073	+	--++---++--+--+--++--+++-	0.002	0.006
306300	rs11165984	c	g	95454	-0.752	0.4519	-	+-+++-++++--+---+-+-+--+-	-0.006	0.006
306301	rs11165989	t	c	95299	1.34	0.1803	+	-+++---+++-+-+++-+++-+-++	0.0077	0.0053
306302	rs1116599	t	c	95454	0.253	0.8003	+	--++---++--+-++--++--+++-	0.0021	0.006
306303	rs11165990	a	g	95454	-0.11	0.9125	-	++-+++---+-----++++------	-0.0018	0.008
306304	rs11165993	t	g	2951	2.341	0.01924	+	???????????????????????+?	0.8748	0.3717
306305	rs11165994	a	g	91293	0.982	0.3263	+	-++-+--+++-+-+---+?+-++++	0.0071	0.0057
306306	rs11165995	a	g	95454	-1.253	0.2102	-	+--+-++---+-+-+-+---+-+--	-0.0082	0.0056
306307	rs11165996	a	c	91293	-1.03	0.303	-	+--+-++---+-+-+++-?-+----	-0.0073	0.0056
306308	rs11165998	a	g	95454	-0.241	0.8096	-	--+---+-+++++-+-----+-++-	0.0013	0.006
306309	rs11165999	c	g	95454	-0.545	0.5856	-	++-+++-------+--+++++---+	-0.0047	0.0055
306310	rs11166001	t	c	95379	-0.081	0.9354	-	-+---++--+--+++----++---+	-7e-04	0.0063
306311	rs11166002	t	c	95424	-0.242	0.8085	-	---++-+++-++-+----++-----	-0.001	0.0058
306312	rs11166003	a	g	95454	0.417	0.6768	+	+++--+---+--++++-+---++++	0.0022	0.0053
306313	rs11166004	a	g	95454	0.35	0.7267	+	++---+---+--++++++--+++++	8e-04	0.0059
306314	rs11166005	c	g	95454	0.206	0.8367	+	--+++++---++++------+--++	0.0019	0.0072
306315	rs11166009	t	c	95454	-0.851	0.3948	-	----+-++---+++-----++---+	-0.0035	0.0055
306316	rs11166010	a	c	95454	1.108	0.268	+	++++-+--+++---+++++--+++-	0.0055	0.0053
306317	rs11166011	t	g	95454	0.361	0.7181	+	--++--++--++++-----+-----	0.0029	0.0072
306318	rs11166012	a	g	95415	-0.196	0.8444	-	++--++---+----+++++--+++-	-0.0012	0.0054
306319	rs11166013	t	c	95454	-0.2	0.8414	-	+++++++---++-+------+---+	-9e-04	0.0067
306320	rs11166015	a	c	95454	0.09	0.928	+	--++--+++-++++-----++---+	5e-04	0.0055
306321	rs11166016	t	c	95454	1.055	0.2913	+	--+-+--++++++-+++-++-+++-	0.0075	0.0059
306322	rs11166017	a	t	95454	-1.095	0.2735	-	++-+-++------+---+--+---+	-0.0078	0.0058
306323	rs11166018	a	c	95416	1.084	0.2782	+	-++-+--++++++-+++-++--+-+	0.0079	0.0059
306324	rs11166029	t	c	38680	0.179	0.8583	+	?-+?-++-++??+-??-+-+??++?	0.0021	0.0087
306325	rs11166037	a	g	95116	-0.129	0.897	-	--+-+--++-+++++---++++---	-2e-04	0.0087
306326	rs11166038	a	g	63156	0.873	0.3828	+	+-+--+---?+?-+???+---?+++	0.0238	0.0289
306327	rs11166039	a	g	95454	0.629	0.5295	+	-+++--+-+++-+-+--+-+-++++	0.0035	0.0054
306328	rs11166042	t	c	95454	1.171	0.2415	+	-+---+---+++-+++-+-+-++-+	0.0076	0.006
306329	rs11166056	t	c	95454	-0.151	0.8799	-	++--+++--++--+-+---++-+--	-0.001	0.0054
306330	rs11166057	a	g	95454	0.052	0.9588	+	--++---+++--+-+-+-+--+--+	3e-04	0.0053
306331	rs11166059	t	c	95454	0.093	0.9259	+	--++---++++++-+-+++--+-++	7e-04	0.0053
306332	rs11166067	t	c	95454	1.126	0.26	+	++++--+++++++-+---+--++++	0.0061	0.0057
306333	rs11166073	a	g	95454	0.323	0.7469	+	--++-++-+++--++-++-+--+++	0.0026	0.0056
306334	rs11166098	t	c	92503	0.04	0.9679	+	---++---+-+--+--++++++-?-	9e-04	0.0067
306335	rs11166101	t	c	92503	-0.099	0.9208	-	--++-++-+++---+--+----+?-	0	0.0054
306336	rs11166102	t	c	92503	-0.306	0.7597	-	+++--+++-+-+--++------+?+	-0.0026	0.0067
306337	rs11166104	t	c	92473	0.371	0.711	+	---++---+-+-++--++++++-?-	0.0031	0.0067
306338	rs11166108	a	g	92503	0.049	0.961	+	++++---+---++--+-----+-?+	-1e-04	0.0052
306339	rs11166109	t	g	92503	-0.054	0.9571	-	---++---+-+-++--++++++-?-	3e-04	0.0067
306340	rs11166111	a	g	95454	-0.057	0.9542	-	+++--+++-+-+--++------++-	-0.001	0.0066
306341	rs11166113	t	c	95349	0.051	0.959	+	++++---+---++--+-----+-+-	-1e-04	0.0052
306342	rs11166123	t	c	95393	-0.217	0.8283	-	+-+---+++++-+-+-++++---+-	-0.0014	0.0053
306343	rs11166127	a	g	31092	0.529	0.5966	+	???-??-+?+??-???-+++?+-+?	0.0183	0.0414
306344	rs11166128	c	g	92503	0.276	0.7825	+	--+-+++---++--+++-----+?+	0.002	0.0064
306345	rs11166129	a	g	92503	0.287	0.7739	+	--+-+++---++--+++-----+?+	0.0021	0.0064
306346	rs11166131	t	c	92503	-0.326	0.7447	-	+-+---+++++-+-+-++++--+?-	-0.0019	0.0055
306347	rs11166132	a	c	95416	-0.206	0.8366	-	-+-+-------+++-+--++++---	-0.0011	0.0053
306348	rs11166135	a	g	95454	-0.38	0.7038	-	+-+--+---+---++-++---+-++	-0.0031	0.0086
306349	rs11166138	c	g	95454	-1.414	0.1575	-	--++----++--+----++0-+-0-	-0.0066	0.0052
306350	rs11166139	t	g	95454	-1.121	0.2625	-	--+--++-++------+++----++	-0.0061	0.0063
306351	rs11166141	a	g	95454	-1.674	0.09417	-	+-+---+++---+---+-+-+----	-0.0099	0.0054
306352	rs11166143	a	t	95369	-1.394	0.1634	-	-++-----+---++-++---++---	-0.0081	0.0068
306353	rs11166144	a	g	95454	1.558	0.1192	+	-+-+++---+++-+++-+-+-++++	0.0092	0.0054
306354	rs11166146	t	c	10116	2.188	0.02864	+	?????????????+??????++???	0.0434	0.0192
306355	rs11166147	t	c	95408	0.235	0.8144	+	+---+++--+-++++--+-+++--+	0.0013	0.0099
306356	rs11166152	a	g	92503	1.83	0.06731	+	+---++++---+-+--++-+++-?-	0.0132	0.0068
306357	rs11166154	a	c	95454	0.074	0.9409	+	+---+-+-+--++++--+--++--+	0.0011	0.009
306358	rs11166155	t	c	95454	0.184	0.8543	+	+---+-+-+--++++--+--++--+	0.0021	0.009
306359	rs11166158	a	g	95454	0.688	0.4912	+	+--++-++-+-+-+---+-++++--	0.0044	0.0053
306360	rs1116616	t	c	85417	-1.201	0.2297	-	++++-+--+-+--+??+----+-++	-0.0163	0.0132
306361	rs11166161	t	c	95454	0.841	0.4004	+	+---+-++-+++++---+-++++--	0.0049	0.0053
306362	rs11166163	a	g	92372	3.85	0.0001183	+	++-++++++++++++?-+-+--+--	0.0222	0.006
306363	rs11166165	t	c	37955	1.21	0.2262	+	+-??-++??????+??++?++???-	0.0302	0.0254
306364	rs11166166	t	c	95448	0.533	0.5943	+	+--++-++-+-+-+---+-++++--	0.0037	0.0053
306365	rs11166167	a	g	7776	1.848	0.06459	+	?????????????+???????????	0.044	0.0237
306366	rs11166170	a	g	95454	0.742	0.4583	+	+---+++--++-+-+--+++-++++	0.0042	0.0069
306367	rs11166171	a	t	95454	-0.747	0.4551	-	-+++---++--+-+-++---+----	-0.0042	0.0069
306368	rs11166177	a	c	95454	1.999	0.04563	+	++-++++--+++-+++++++-++-+	0.0108	0.0052
306369	rs11166179	t	g	95400	0.246	0.8059	+	+--+--+-++++--+--+---++-+	0.0025	0.0083
306370	rs11166180	a	g	95454	-2.236	0.02535	-	+-++--+-+---+++-----+---+	-0.0172	0.0076
306371	rs11166182	a	g	95454	1.252	0.2105	+	---++++--+++---+-+-+-++-+	0.0071	0.0053
306372	rs11166197	t	c	95454	1.444	0.1488	+	-+---+-+-+++---++-++--++-	0.0099	0.0072
306373	rs11166198	a	t	95454	-0.794	0.4275	-	--+-+-+-+---++--++++----+	-0.0043	0.0065
306374	rs11166202	a	t	84305	0.917	0.3589	+	-+-+++-++++-+-+?+++-+-+?-	0.0195	0.0187
306375	rs11166204	a	g	95454	1.042	0.2976	+	+-+-+++++---++-++-++++-+-	0.0132	0.0146
306376	rs11166205	t	c	95454	-0.388	0.6979	-	-+-+--+--+++--+--+------+	-0.0024	0.0154
306377	rs11166206	a	g	95454	0.436	0.6625	+	+-+-++-++---++-++-++++++-	0.0032	0.0153
306378	rs11166208	a	g	5683	-1.985	0.0472	-	-?-????????????????-?????	-0.2503	0.1498
306379	rs11166209	t	c	95454	-0.418	0.6757	-	-+-+--+--+++--+--+------+	-0.0027	0.0154
306380	rs11166210	a	g	95454	-0.4	0.6894	-	-+-+--+--+++--+--+------+	-0.0024	0.0154
306381	rs11166211	t	c	91525	-0.3	0.764	-	+-+-+--++?--?-++--+0+-+++	-0.0067	0.0191
306382	rs11166212	a	g	95454	-0.071	0.943	-	-+-+-++--+++-+--++---+---	1e-04	0.018
306383	rs11166219	a	g	95454	-0.195	0.8457	-	-+-+-++-----++--++-+-+---	-1e-04	0.0052
306384	rs11166220	a	g	92503	-0.194	0.8459	-	+-++--+--++++----+---+-?-	-8e-04	0.0177
306385	rs11166221	t	c	95454	-0.487	0.6262	-	+-+-+--+--++---++++--+++-	-0.0035	0.0065
306386	rs11166222	c	g	95454	-0.164	0.8698	-	++--+--++-----+++-+++-+++	-0.0068	0.0148
306387	rs1116623	t	g	95454	-0.341	0.7333	-	+----+--+--+++-+-+-+-+-+-	-0.0027	0.006
306388	rs11166232	a	g	95454	-0.869	0.3849	-	+----+-++----+--+-++-+-+-	-0.0076	0.0081
306389	rs11166233	t	c	95450	-1.244	0.2135	-	+----+-+-----+--+-++-+-+-	-0.0107	0.0078
306390	rs11166238	a	g	94769	-1.542	0.123	-	+++---+-+-------+--+++-+-	-0.0189	0.0123
306391	rs11166240	t	c	95454	-0.866	0.3867	-	+++-----+-+-----+-+++--+-	-0.0128	0.0126
306392	rs11166241	t	c	95454	1.126	0.2601	+	++-++-+-+++++-++-+--+++-+	0.0104	0.0079
306393	rs11166243	c	g	91293	-0.875	0.3816	-	+++--++-+-+-----+-?+++---	-0.0122	0.0145
306394	rs11166244	t	c	91293	0.704	0.4813	+	---++--+-+-++-++-+?---+++	0.0087	0.014
306395	rs11166247	a	g	91267	-0.775	0.4386	-	+++--++-+-+--+--+-?++----	-0.0103	0.0144
306396	rs11166248	t	c	88342	-0.785	0.4325	-	+++--++-+-+-----+-?+-+-?-	-0.0103	0.0146
306397	rs11166249	a	g	91293	0.715	0.4747	+	---++--+-+-++-++-+?-+-+++	0.0086	0.0143
306398	rs11166250	t	c	88342	-0.594	0.5526	-	+++--++-+-+--+--+-?+-+-?-	-0.0075	0.0147
306399	rs11166251	t	g	88329	0.91	0.3629	+	---++--+-+-+++++-+?-+-+?+	0.0123	0.0151
306400	rs11166252	a	t	95454	-1.395	0.163	-	--++++-+-----+--+-++--+++	-0.0145	0.0098
306401	rs11166256	a	g	95389	-0.394	0.6933	-	+-+++-+-+--++----+-+++---	-0.003	0.0057
306402	rs11166257	t	g	95454	0.362	0.7176	+	+++++----++++----+-+++--+	0.0018	0.0073
306403	rs11166264	a	g	95454	0.422	0.6728	+	+++++----++++----+-+++--+	0.0019	0.0073
306404	rs11166265	a	g	10120	1.268	0.2048	+	?????????????+??????++???	0.0233	0.0193
306405	rs11166266	t	c	15284	1.01	0.3123	+	?+???+-?????????+???++??+	0.0162	0.0236
306406	rs11166268	a	c	92488	0.176	0.8605	+	-+---+-+-++-+++++-+---+?+	0.0019	0.0057
306407	rs11166270	a	g	95454	-0.355	0.7223	-	+-+++-+-+--++----+-+++---	-0.0028	0.0056
306408	rs11166271	a	g	95454	-0.35	0.726	-	+-+++-+-+--++----+-+++---	-0.0027	0.0056
306409	rs11166272	t	c	95454	0.278	0.7809	+	+-+++----++++----+-+++--+	9e-04	0.0073
306410	rs11166273	a	g	95454	-0.438	0.6617	-	-+---++++----++++-+---++-	-0.0022	0.0073
306411	rs11166274	a	g	95380	0.246	0.8059	+	-+---++++----++++-+---++-	0.0024	0.0067
306412	rs11166276	t	c	95350	-0.063	0.9497	-	+----+-+--+-+++++-++++-+-	-7e-04	0.0052
306413	rs11166281	t	c	95454	-0.069	0.9453	-	--+-+++++--+-+--+---+---+	0.0053	0.0089
306414	rs11166282	t	c	95454	-0.033	0.9738	-	--+-+++++--+-+--+---+---+	0.0053	0.009
306415	rs11166284	a	t	95446	-0.289	0.7725	-	--+-+-+--+--++--+--+----+	-8e-04	0.0056
306416	rs11166285	t	c	95454	-0.264	0.7919	-	-++--+---++-++++--+-++---	-3e-04	0.0077
306417	rs11166286	a	g	95454	0.933	0.3507	+	++-++--+--++--+---+----++	0.0064	0.0081
306418	rs11166295	a	c	83404	-0.336	0.7367	-	+-?-?-+-+--+++-?+++++++--	-0.0088	0.0171
306419	rs11166296	c	g	80453	-0.185	0.8531	-	+-?-?-+-+--+++-?+++++++?-	-0.0062	0.0171
306420	rs11166297	a	g	89128	-0.254	0.7991	-	+-?-+-+----+++??+++-+++--	-0.0063	0.0162
306421	rs11166298	a	g	95454	1.587	0.1126	+	+-+--+++-+++--++++++---++	0.0195	0.0141
306422	rs11166300	a	c	86452	0.241	0.8098	+	-+?+?+-+-+++--+--------++	0.0073	0.017
306423	rs11166301	a	t	86483	-0.183	0.8551	-	+-?-?-+-+---++-++++++++--	-0.006	0.017
306424	rs11166303	t	c	86461	0.086	0.9314	+	-+?+?+-+-+++--+--------++	0.0036	0.0171
306425	rs11166316	a	g	95454	-1.154	0.2484	-	--++++++-----+-++-+-+-+--	-0.0061	0.0059
306426	rs11166317	t	c	95454	0.735	0.4623	+	++------+++++-+--+-+-+-++	0.003	0.0057
306427	rs11166318	a	t	95454	0.676	0.4992	+	++------+++++-+--+-+-+-++	0.0026	0.0057
306428	rs11166319	a	g	95454	-0.651	0.5152	-	--++++++-----+-++-+-+-+--	-0.0025	0.0057
306429	rs11166320	t	c	95454	-0.582	0.5606	-	--++++++-----+-++-+-+-+--	-0.0021	0.0057
306430	rs11166321	a	g	95454	-0.554	0.5794	-	--++++++-----+-++-+-+-+--	-0.002	0.0057
306431	rs11166322	a	g	95454	0.65	0.5158	+	-+++-+++++--+--++++-+-++-	0.0049	0.0066
306432	rs11166324	c	g	95367	-0.764	0.4447	-	+---+-----++-++----+-+--+	-0.0058	0.0066
306433	rs11166327	t	c	95454	-0.527	0.5981	-	-+--+-++-----+--+--+-++--	-0.004	0.0105
306434	rs11166329	t	g	95454	0.248	0.8041	+	++------+--+++---+-+-++-+	0.0011	0.0059
306435	rs11166334	a	c	86372	-2.016	0.04384	-	++-++-+-------??--?+++---	-0.0189	0.0092
306436	rs11166335	t	c	95454	0.757	0.4488	+	-+++-++++-+---+++++-+--++	0.006	0.0065
306437	rs11166343	c	g	95454	1.502	0.1331	+	-++--+-++++++--+++++-+-++	0.0131	0.0082
306438	rs11166344	c	g	95237	-0.594	0.5525	-	++--+----+-+++-----+-+---	-0.0052	0.0064
306439	rs11166345	a	g	95418	-0.546	0.5851	-	--++++++------+++---+++--	-0.0017	0.0054
306440	rs11166346	a	t	95454	0.593	0.5531	+	--++-++++-+---+++++-+-+++	0.0051	0.0064
306441	rs11166347	a	g	95454	-0.502	0.6155	-	--+++++++-----+++---+-+--	-0.0015	0.0054
306442	rs11166353	t	c	94704	-0.449	0.6533	-	+++-+-+-++++-+-----+-+++?	-0.0027	0.0055
306443	rs11166355	t	g	94704	0.607	0.5436	+	++-+-+++--+++-+-+++-+-+-?	0.0027	0.0056
306444	rs11166356	t	g	94704	-0.616	0.5377	-	--+-+---++-+-+-+---+-+-+?	-0.0028	0.0056
306445	rs11166358	t	c	95454	0.763	0.4453	+	++-+-+++--+++-+-+++-+++-+	0.0035	0.0056
306446	rs11166361	a	g	88671	-0.156	0.8758	-	+--++-++--+-+++?--+-++-??	-0.0081	0.0162
306447	rs11166364	a	g	8598	-0.957	0.3386	-	?????????????-??????--???	-0.0379	0.0474
306448	rs11166366	c	g	95454	1.257	0.2089	+	--++-+-+--+++++---+-+-+++	0.0065	0.0052
306449	rs11166367	a	g	95454	1.373	0.1696	+	--++-+-+--+++++---+-+-+++	0.0071	0.0052
306450	rs11166368	a	t	95454	1.341	0.1801	+	--++-+-+--+++++-+-+-+-+-+	0.0073	0.0053
306451	rs11166371	t	c	95454	0.601	0.5479	+	---+-+-+---+-++++-+---+-+	0.0027	0.0052
306452	rs11166375	t	c	95454	-0.649	0.5166	-	+++-+-+-+++-+----+-+++-+-	-0.0028	0.0052
306453	rs11166376	t	c	10116	0.51	0.6102	+	?????????????+??????-+???	0.0085	0.0166
306454	rs11166377	a	g	10121	0.104	0.9168	+	?????????????+??????+-???	0.0013	0.0153
306455	rs11166378	a	g	95358	1.193	0.2329	+	+++--++-+++++-+++--++-+++	0.0135	0.0137
306456	rs1116638	a	g	7776	0.876	0.3813	+	?????????????+???????????	0.0174	0.0198
306457	rs11166381	c	g	95454	1.76	0.07844	+	++-++++---+--++++++-+++--	0.0095	0.0056
306458	rs11166382	a	c	95414	-0.458	0.6471	-	--+----+-+++--+---+-+-+++	-0.0019	0.0064
306459	rs11166384	t	c	95454	2.682	0.007327	+	++++++--++++-+++--+++++++	0.0196	0.0073
306460	rs11166387	a	c	95454	-0.034	0.9725	-	-----+----+--++-+++-+++-+	9e-04	0.0118
306461	rs11166389	a	g	95454	3.086	0.002032	+	++++++++++++++++--+++-+++	0.0269	0.0087
306462	rs11166394	a	c	94704	-1.53	0.1261	-	----+-++---------++-++--?	-0.017	0.0127
306463	rs11166399	a	g	95454	-1.521	0.1283	-	----+-++-----+---++-++---	-0.0167	0.0128
306464	rs1116640	a	g	94483	1.017	0.309	+	-+++-+++-+---+--++-+-+++-	0.0077	0.0065
306465	rs11166405	a	g	95454	-1.716	0.08612	-	----+-++---------++-++---	-0.0189	0.0128
306466	rs11166407	a	g	95439	2.622	0.00873	+	+++++++--+++-+++--+++++++	0.019	0.0073
306467	rs11166409	t	c	95454	2.691	0.007121	+	+++++++--+++-+++--+++++++	0.0196	0.0074
306468	rs11166411	t	c	93525	1.299	0.1938	+	++++-+--+-++?++++--+--+++	0.0103	0.0123
306469	rs11166412	t	c	95398	-2.777	0.005484	-	+-----++-+--+----+-------	-0.0216	0.0077
306470	rs11166413	a	g	95453	-0.238	0.8121	-	--+-+-+--++--++--+-+++-++	-6e-04	0.0055
306471	rs11166414	a	g	95454	1.579	0.1144	+	++++-+--+++++++++--+--+++	0.0183	0.0128
306472	rs11166428	t	c	92503	-1.158	0.247	-	----+-++----+---+--++-+?-	-0.0072	0.0079
306473	rs11166431	a	t	85622	-0.53	0.5959	-	---+---+-+-++-??++?++-+-?	-0.0061	0.0128
306474	rs11166437	t	c	95448	-1.204	0.2284	-	+--+-------+-----+++--+--	-0.0073	0.0052
306475	rs11166438	t	g	95404	-0.902	0.3672	-	++-+---+---+-----+++--+--	-0.0059	0.0052
306476	rs11166439	c	g	95454	-1.9	0.05737	-	--+-++---++--+--++-------	-0.0099	0.0065
306477	rs11166440	a	g	92381	0.18	0.857	+	-++-+++++++-++-++---++-?+	0.0022	0.0054
306478	rs11166442	t	c	95454	0.808	0.4192	+	++-+--+----+--++--+++++++	0.0025	0.0065
306479	rs11166443	t	c	95454	1.835	0.06653	+	++++--+-+--+-+++--++++++-	0.0105	0.007
306480	rs11166449	a	g	7776	0.237	0.8128	+	?????????????+???????????	0.0082	0.0344
306481	rs11166451	t	c	85777	0.912	0.3619	+	?-+-?+-+-+++++?-++++---?-	0.0149	0.0189
306482	rs11166454	a	g	95454	-1.167	0.2432	-	----++-+-+--+---++------+	-0.0058	0.0067
306483	rs11166456	t	c	95454	-1.461	0.1441	-	--+++----+-+--+--++-----+	-0.0071	0.0053
306484	rs1116646	a	g	89562	0.691	0.4896	+	++++++-----+--??+++-+--+-	0.0066	0.0127
306485	rs11166461	a	t	436	1.55	0.1212	+	?????????????????????+???	0.5484	0.3522
306486	rs11166470	a	c	95454	1.756	0.07907	+	++++-+--+--+-+++--++++++-	0.0103	0.0062
306487	rs11166473	t	c	95403	0.687	0.4921	+	-++++---+-+++++---++-++++	0.0093	0.0098
306488	rs11166474	t	c	95441	1.645	0.1	+	-+---++++--+++-+--++++-++	0.009	0.0053
306489	rs11166475	a	g	95454	1.612	0.1071	+	-+---++++--+++-+--+++++++	0.0087	0.0053
306490	rs11166476	t	c	95454	-1.846	0.0649	-	+-+++----++---+-++----+--	-0.01	0.0053
306491	rs11166478	t	c	95454	0.742	0.4579	+	-++++---+-+++++---++-++++	0.0102	0.0101
306492	rs11166484	a	g	95395	1.035	0.3004	+	-++++---++++++-+-+++-++++	0.0131	0.0098
306493	rs11166486	t	c	95454	-0.712	0.4767	-	--+++-----++--+--+-+--+-+	-0.0032	0.0052
306494	rs11166487	t	c	95454	-0.706	0.4805	-	--+++-----++--+--+-+--+-+	-0.0032	0.0052
306495	rs1116649	a	g	95454	0.396	0.692	+	+----+-+++--++++--++++---	3e-04	0.0052
306496	rs11166498	a	g	95454	0.439	0.6608	+	--+-+-+--+--+++-+++-+--++	0.0033	0.0066
306497	rs11166507	t	c	95454	-0.622	0.534	-	--+-+--+--+-++---+++-+---	-0.0033	0.0058
306498	rs1116651	a	g	95431	-0.53	0.5964	-	+-+++---++++-+--+--+--+-+	-0.0034	0.0053
306499	rs11166511	c	g	95454	0.157	0.8751	+	+--+-+--++-+--+++---+-+-+	4e-04	0.0057
306500	rs11166512	a	t	95454	0.038	0.9696	+	--++---+--+-++---++++++-+	0.001	0.0052
306501	rs11166513	a	c	95454	-0.085	0.9323	-	--+----+--+-++---++++++-+	1e-04	0.0053
306502	rs11166514	a	g	95454	-0.146	0.8843	-	--+----+--+-++---++++++-+	-2e-04	0.0052
306503	rs11166518	t	c	95454	2.296	0.02167	+	++-+++++++++-++++--+---+-	0.0113	0.0052
306504	rs1116652	a	g	95454	-1.35	0.1772	-	+-+-+-+-+++----++----++--	-0.0088	0.0059
306505	rs11166524	t	c	95454	2.248	0.0246	+	++-+++++++++-++++--++--+-	0.0109	0.0052
306506	rs11166528	t	c	92503	-2.586	0.009724	-	++--++--------+-+-----+?+	-0.0211	0.008
306507	rs11166529	t	c	95454	-2.057	0.03966	-	+++-+-------+---+--------	-0.011	0.0053
306508	rs11166534	a	g	36219	1.147	0.2516	+	?+?+?++?-?+?++??+?????+??	0.0482	0.0416
306509	rs11166535	t	g	685	-0.056	0.9555	-	??????????????????????-??	-0.0264	0.4709
306510	rs11166536	c	g	92372	-0.572	0.5676	-	-+++--+--++---+?-++-----+	-0.0041	0.0093
306511	rs11166538	a	g	91292	-0.642	0.5206	-	--+++---+-++++----?+-+---	-0.0041	0.0065
306512	rs11166541	a	t	91293	-0.038	0.97	-	-+-++-----+--++--+?++---+	9e-04	0.0066
306513	rs11166542	t	c	53964	-0.402	0.6878	-	???-?+++?+?-+???-+++-+-?-	-0.0109	0.0301
306514	rs11166549	c	g	7776	-0.81	0.4182	-	?????????????-???????????	-0.0175	0.0215
306515	rs1116655	t	c	88376	-0.056	0.9551	-	-++?-+-++----+-+--++-+++-	-1e-04	0.0072
306516	rs11166550	a	t	95441	0.724	0.4693	+	+----+--++-++--+-+-++++++	0.0041	0.0053
306517	rs1116656	a	g	88376	-1.347	0.178	-	+--?-----+++---+-+--++--+	-0.0087	0.0063
306518	rs11166562	a	g	2485	-0.59	0.5553	-	-????????????????????????	-4.4266	7.4693
306519	rs1116657	t	c	91293	0.18	0.8574	+	---+--++-+-+-+++-+?-+-+++	0.0016	0.0057
306520	rs11166573	a	g	95454	-0.566	0.5714	-	++--+-+++-----+++-+++-+--	-0.0033	0.0053
306521	rs11166576	a	g	95429	0.238	0.8118	+	+-++-++---++-+---++--+--+	8e-04	0.0054
306522	rs1116658	a	c	91293	-0.012	0.9905	-	---+--++-+-+-++--+?-+-+-+	6e-04	0.0057
306523	rs11166580	a	t	95447	-1.65	0.09894	-	--+------+--+-+++--+--+--	-0.0146	0.0087
306524	rs11166584	a	g	95454	0.459	0.646	+	+-+--++-+-++-+---++-++++-	0.0037	0.007
306525	rs11166587	c	g	92372	-0.402	0.6879	-	--++--+-+-+++--?-+-++-++-	-0.0011	0.008
306526	rs11166588	t	c	95425	-0.954	0.3399	-	++--+--+-++---+++--+----+	-0.0068	0.0067
306527	rs11166590	a	g	95454	0.082	0.9344	+	++--++-+-+----+++---++--+	4e-04	0.0062
306528	rs11166591	a	g	95427	-0.194	0.8465	-	--+++---+-+++-++--++--++-	-1e-04	0.0052
306529	rs11166592	t	g	95451	-0.388	0.6977	-	+++-+--++---+++-+++++-++-	-0.0024	0.0052
306530	rs11166593	t	c	95454	-0.616	0.5382	-	-+----++-+-++-+-++-+---++	-0.0027	0.0053
306531	rs11166597	a	g	95454	1.377	0.1686	+	-++-++--++++-+-+--+-+++-+	0.0082	0.0058
306532	rs11166598	t	c	95454	-0.348	0.7275	-	-++-+--++---+++-+-+++-++-	-0.0019	0.0052
306533	rs111666	t	c	93999	1.724	0.0847	+	-+--+++++--++++++++---+-+	0.0105	0.0054
306534	rs1116660	t	c	95454	0.109	0.9135	+	+------+---++-++-+--+-+++	1e-04	0.0064
306535	rs11166600	a	g	95454	-1.373	0.1698	-	+--+--++----+-+-++-+---++	-0.0081	0.0058
306536	rs11166601	a	g	95454	-0.528	0.5972	-	-+----++-+--+-+-++-+---++	-0.0021	0.0053
306537	rs11166602	a	g	92503	1.027	0.3045	+	+-++++--+-+--+-+--+-+++?-	0.0051	0.0054
306538	rs11166603	t	c	92349	-0.268	0.7887	-	+-++---++--+--+?+++-+++--	-0.0011	0.0116
306539	rs11166605	a	g	95419	-0.012	0.9906	-	+-++++---++----+--+--++-+	-0.0011	0.0052
306540	rs11166606	a	g	95451	-0.933	0.3507	-	+--+--+--++-+---+--+-+-++	-0.0081	0.0073
306541	rs11166607	a	g	95381	0.011	0.9911	+	-+----+++--++++-++-++--+-	0.0011	0.0052
306542	rs1116661	a	g	95454	-0.38	0.7042	-	-++++++-+++-----+-++-+---	-0.0017	0.0063
306543	rs11166610	a	g	92429	-0.501	0.6166	-	-+-+-+++---+--+--+--+++?-	-0.0023	0.0053
306544	rs11166611	t	c	95446	0.478	0.6328	+	++-+-+++-+-+--+--+-+++++-	0.0028	0.0053
306545	rs11166612	a	g	95454	-0.416	0.6774	-	-++----++---+++-++++--++-	-0.002	0.0053
306546	rs11166614	t	c	95269	1.082	0.2793	+	---+--++++--++-+-++++--++	0.007	0.0056
306547	rs11166616	t	c	95454	1.489	0.1365	+	-++--+-+++-++++++-++-+++-	0.0079	0.0052
306548	rs11166618	a	g	95440	0.583	0.5599	+	++----++++-++--+--++++++-	0.0039	0.0065
306549	rs11166621	a	t	95454	0.891	0.3727	+	+++++-+-++-+++++-+--+--++	0.0049	0.0054
306550	rs11166622	a	g	95454	-0.97	0.3319	-	--+--+-+++------+-+++++--	-0.0052	0.0056
306551	rs11166623	a	c	95454	0.432	0.6658	+	-+-+++----+-++-+-+--++-+-	0.0025	0.0054
306552	rs11166624	t	c	95447	-0.631	0.5278	-	--+-+--++-+-----++--+++0+	-0.0032	0.0063
306553	rs11166625	a	t	95454	0.144	0.8855	+	+-++-+++--------+--++-+++	0.0011	0.0077
306554	rs11166629	t	c	95437	0.039	0.9687	+	+-+---++-+++---+-+++++--+	0	0.0057
306555	rs11166632	t	c	95450	-1.197	0.2312	-	++-+++-+--+------++--+--+	-0.0068	0.0053
306556	rs11166634	t	c	95454	1.652	0.09844	+	-++-+-++---++++-+--+-++++	0.012	0.0067
306557	rs11166637	t	c	10103	-1.466	0.1427	-	?????????????-??????--???	-0.0234	0.0155
306558	rs11166639	a	g	1839	-0.378	0.7053	-	??????????????-??????????	-0.017	0.0447
306559	rs1116664	t	g	25289	-0.035	0.9723	-	????-+????+??-??-???--??-	-0.0036	0.0485
306560	rs11166641	a	t	89914	-1.446	0.1483	-	--++++++------?+++---+-??	-0.0243	0.0211
306561	rs11166643	t	c	95454	0.65	0.5154	+	+++++++-+++----+--++-+-+-	0.0021	0.0052
306562	rs11166644	a	g	95440	-0.243	0.8082	-	+--+--+-+--++++-+----++-+	-0.0023	0.0076
306563	rs11166645	t	g	95454	0.475	0.6345	+	-++-+--++++++--+--+++----	0.0028	0.0062
306564	rs11166646	t	c	95367	-0.674	0.5006	-	+--+-++-------+-++---++++	-0.0041	0.0063
306565	rs11166647	t	c	95454	-1.137	0.2553	-	+++--+++--+---+-----+--++	-0.0137	0.013
306566	rs11166649	a	g	95454	0.028	0.9777	+	+------++-+----++++-+++-+	-7e-04	0.0054
306567	rs11166650	a	g	95454	0.643	0.5205	+	-++++++-++-+---+--++-+--+	0.0039	0.0056
306568	rs11166652	t	c	95454	0.568	0.5701	+	-++++++--+-++++----+---+-	0.0032	0.0054
306569	rs11166653	a	g	95454	0.415	0.6779	+	-++++++--+-++++---++---+-	0.0024	0.0054
306570	rs11166654	t	c	85325	1.122	0.2618	+	---++---++-+++??++++-++--	0.0133	0.0137
306571	rs11166656	a	g	87387	-2.014	0.044	-	+----+---+++----------+?+	-0.0289	0.0144
306572	rs11166657	t	g	95454	0.623	0.533	+	++--++-+-++--++--+++-++-+	0.004	0.0064
306573	rs11166658	t	g	95454	0.702	0.4825	+	++--++-+-++--++--+++-++-+	0.0044	0.0064
306574	rs11166668	c	g	92503	-0.402	0.6877	-	+++-----+-++----++--+++?-	-0.0023	0.0163
306575	rs11166669	t	c	34012	-0.599	0.549	-	?++??---+-??--??++--??+??	-0.0093	0.0249
306576	rs11166670	a	c	95454	-0.521	0.6024	-	++-+-++-----+-++-+++----+	-0.0034	0.0053
306577	rs11166673	a	c	95454	-0.555	0.5787	-	++---++-----+-++-+++--+-+	-0.0038	0.0053
306578	rs11166679	a	g	95454	-0.116	0.9074	-	-++-+-----++++------++---	1e-04	0.0062
306579	rs1116668	a	g	17467	1.962	0.04977	+	++-?+??????????????+++???	0.1025	0.0514
306580	rs11166680	c	g	95436	-1.07	0.2846	-	++-+-+-++-+++------+--+--	-0.006	0.0053
306581	rs11166681	t	c	2090	-1.432	0.1521	-	??-???????????????????-??	-0.3922	0.2715
306582	rs11166682	a	g	92503	-0.346	0.7294	-	++-+--+++-+-+--++--+--+?+	-0.0026	0.0052
306583	rs11166683	a	c	92503	-0.007	0.9943	-	+--+---+-++-+-++-+++--+?-	-0.0031	0.0082
306584	rs11166685	a	g	88211	-0.048	0.9616	-	------+++++-++-?-+?--+-++	4e-04	0.0078
306585	rs11166686	a	g	95454	1.427	0.1536	+	++-+++-++-+-+-++++++-++-+	0.0131	0.01
306586	rs11166687	t	c	95400	-1.548	0.1216	-	--+---+--+-+-+------+--+-	-0.0136	0.0098
306587	rs11166690	t	c	95454	0.093	0.9258	+	++-+--+++-+-++-----+-++-+	0.001	0.0063
306588	rs11166692	c	g	95454	0.29	0.7718	+	----+-++---+-++--+-++++--	0.0019	0.0058
306589	rs11166696	t	g	95317	-0.406	0.685	-	--+-++---+-+--++-++-+--+-	-0.0031	0.0064
306590	rs11166700	t	c	95454	0.603	0.5464	+	+-++---++++-++++--++-+---	0.0022	0.0055
306591	rs11166708	t	c	95454	1.272	0.2032	+	-+-+-++++---+++---++-++-+	0.0084	0.0059
306592	rs1116671	a	g	95454	-0.481	0.6304	-	-+-++----+-+++-+--+++----	-0.003	0.0053
306593	rs11166710	t	c	95407	-1.18	0.2379	-	--+++----+----++++-----+-	-0.0068	0.0066
306594	rs11166712	c	g	95454	-1.203	0.2288	-	--+----+-+----+--++--++++	-0.0066	0.0058
306595	rs11166719	c	g	95454	0.172	0.8631	+	--+++++--++--+++++-----+-	0.0016	0.0055
306596	rs11166720	a	g	95454	-0.797	0.4254	-	--+---+--+-++-+--+--+++-+	-0.0041	0.0059
306597	rs11166721	a	g	95432	-0.801	0.4232	-	--+---+--+-++-+--+--+++-+	-0.0042	0.0059
306598	rs11166722	t	g	95402	0.677	0.4981	+	++-++-+++-+-++-++--+-+---	0.0034	0.0068
306599	rs11166723	a	g	95454	-0.81	0.4177	-	--+---+--+-++-+--+--+++-+	-0.0042	0.0059
306600	rs11166724	a	g	92465	0.254	0.7992	+	++-++--++---++++--+-+--?-	3e-04	0.0083
306601	rs11166725	a	g	95454	-1.943	0.052	-	++-----+++--+---+---+++-+	-0.0133	0.007
306602	rs11166726	t	c	95454	-0.833	0.4047	-	++-++--++---+-+-+----+-++	-0.0048	0.0051
306603	rs11166727	t	c	95394	-0.453	0.6509	-	--+------+-+-+++-+--+--+-	-0.0015	0.0058
[truncated: 1 more rows]

## Sheet: TC
	V1	V2	V3	V4	V5	V6	V7	V8	V9	V10
33995	rs10106038	a	g	100184	0.147	0.8828	+	-+--+-++-++-+-+-+++--+-+-	0.0019	0.0058
33996	rs10106040	c	g	100184	0.611	0.5413	+	--+-++-+-++++-++++--+-+++	0.0045	0.0052
33997	rs10106044	a	g	100184	0.121	0.9036	+	-++---+-++++++--+-----++-	9e-04	0.0064
33998	rs10106045	a	t	100184	-0.298	0.7655	-	+---+++++--+----++-+++-+-	-0.0013	0.0053
33999	rs10106046	t	g	66054	-0.447	0.655	-	---+?+--+-+?++??++-+--+++	-0.0092	0.0238
34000	rs10106054	a	g	81714	-2.553	0.01069	-	-+?---?????-?-+-++----+?-	-0.0163	0.007
34001	rs10106056	a	g	43261	-0.177	0.8593	-	??--?--??++??-??+?+++?+-?	-0.002	0.0368
34002	rs1010606	a	c	100184	0.756	0.4496	+	--++++++---++-++--+----+-	0.0037	0.0052
34003	rs10106060	a	g	100184	1.955	0.05052	+	--+++++++++-+-+++++-+++--	0.0117	0.0059
34004	rs10106061	t	c	100184	0.596	0.551	+	-+-+-+-+++---+++-+++---++	0.0045	0.0072
34005	rs10106065	t	c	26975	-0.415	0.6783	-	?-?+???---??????????++-??	-0.0219	0.0409
34006	rs10106069	t	c	100184	0.083	0.9337	+	-++++-+++-+-----+-+++++-+	0.0014	0.0051
34007	rs10106070	a	g	100094	1.392	0.1638	+	+-+++-++---++-++---++----	0.0072	0.0061
34008	rs10106071	t	g	100184	-0.953	0.3406	-	-++--+--------++-+-+-++-+	-0.0053	0.0058
34009	rs10106072	a	t	92879	1.175	0.24	+	++++--++-++++-+?+-?+++-++	0.0107	0.0148
34010	rs10106075	t	c	100184	-0.748	0.4544	-	---++--++-+++-+-+-+--+-++	-0.0046	0.0078
34011	rs1010608	a	g	98572	1.245	0.2132	+	+++++--+-+-+++--++-+-+--+	0.0075	0.006
34012	rs10106081	t	c	100184	1.702	0.08882	+	++++++---+-++-+++-++--+++	0.008	0.0053
34013	rs10106082	t	c	1940	0.715	0.4743	+	??????????????+??????????	0.0346	0.0481
34014	rs10106085	a	t	100184	-0.286	0.7748	-	-++---+-+-+--++-+-+--+---	-0.0015	0.0054
34015	rs10106086	a	g	100184	1.5	0.1337	+	++--+++-+--++-++-+-+--+-+	0.0076	0.0052
34016	rs10106087	t	c	100184	-0.392	0.695	-	++-+-+--++-+--+-+----+--+	-0.0022	0.0052
34017	rs1010609	a	g	98521	-0.583	0.5598	-	-+----++++---+++--+-+----	-0.0027	0.0051
34018	rs10106091	a	g	7806	0.936	0.349	+	?????????????+???????????	0.0179	0.019
34019	rs10106092	a	t	97148	0.522	0.6018	+	--+--+++--+--++++++++++?+	0.0037	0.0067
34020	rs10106093	t	c	100184	-0.695	0.487	-	+-++--++----+-+-+--+-+---	-0.0061	0.0072
34021	rs10106095	t	g	1459	0.263	0.7925	+	??????+??????????????????	0.0832	0.3145
34022	rs10106098	a	g	100184	0.082	0.9344	+	+++---+--+--+++-+-+--+++-	-2e-04	0.0051
34023	rs10106100	t	c	87021	-0.279	0.7806	-	++--++-----++--?++?+--+++	-0.0133	0.0157
34024	rs10106102	c	g	100184	-0.741	0.4589	-	+--+-++++++---++++-------	-0.0043	0.0051
34025	rs10106108	t	c	100184	0.924	0.3554	+	+--+---++--+-++-+++-+-++-	0.004	0.005
34026	rs10106109	a	t	100184	1.62	0.1052	+	+--+-++-++-++-++--++--++-	0.0071	0.0055
34027	rs10106115	t	g	100184	1.592	0.1114	+	--+--+++-+-+++++--+---+-+	0.0091	0.0057
34028	rs10106118	t	c	100142	-0.123	0.9025	-	--+-++--+-+----+---+++-++	-6e-04	0.0053
34029	rs10106122	a	t	100184	0.303	0.7621	+	++---++---++--++-+-+++++-	9e-04	0.0062
34030	rs10106123	a	g	96000	-1.058	0.2901	-	+-+--++-++--------?-++-++	-0.0184	0.0155
34031	rs10106128	a	g	100184	-2.395	0.01662	-	-++--+--++-+----+------+-	-0.0117	0.0051
34032	rs10106129	a	g	3749	1.583	0.1135	+	????????????????+??????+?	0.228	0.1418
34033	rs10106132	c	g	97062	0.706	0.4803	+	-+++-++--++---+?----+-+-+	0.0144	0.0192
34034	rs10106136	a	t	100178	0.27	0.7871	+	--+++++-+++-+--+++--++--+	0.0028	0.007
34035	rs10106137	a	c	100184	-0.237	0.8127	-	++---++-+-+--+++++----+--	-0.0024	0.0109
34036	rs10106140	t	c	7806	0.162	0.8712	+	?????????????+???????????	0.0041	0.0254
34037	rs10106148	a	g	91478	-0.308	0.758	-	-+-+--+-+-?+---?+-?-+-+--	1e-04	0.0162
34038	rs10106149	c	g	7806	-0.259	0.7959	-	?????????????-???????????	-0.0047	0.0181
34039	rs1010615	a	g	98653	-0.061	0.9511	-	---+++----+-++-+--------+	5e-04	0.0073
34040	rs10106150	t	g	93434	-0.554	0.5798	-	++--++------++-+++----+--	-0.012	0.0127
34041	rs10106155	a	c	100184	0.436	0.6628	+	-+++-+-++---+-++----+-+--	0.0029	0.0051
34042	rs10106165	a	g	4609	1.185	0.2358	+	?????????????++??????????	0.0272	0.041
34043	rs10106174	a	g	97119	-0.36	0.7185	-	-+-++--+-----+--+++-++-?+	-0.001	0.0055
34044	rs10106176	a	t	100184	1.482	0.1383	+	--+++++++-++++-+-+-+---++	0.0107	0.0069
34045	rs10106178	t	c	42370	0.199	0.8421	+	???+??--+-???+????-???-++	0.0044	0.0406
34046	rs10106179	a	c	98244	0.542	0.5882	+	---++++-+++-++?--+++++-++	0.0071	0.0111
34047	rs10106183	t	c	1306	-0.88	0.3788	-	??????????-??????????????	-0.1189	0.1344
34048	rs10106185	a	g	100184	0.04	0.9678	+	----+-++---++-+++----+---	0.0011	0.0052
34049	rs10106186	a	g	82658	1.576	0.1151	+	+-?-+---++++++??-+?--?+++	0.0321	0.0213
34050	rs10106189	a	c	100184	0.773	0.4397	+	---+++--+-++-+++-+++-+++-	0.0043	0.0057
34051	rs10106194	t	c	100031	-0.629	0.5296	-	---+++-+++--+--++++-++-+-	-0.0038	0.0059
34052	rs10106195	a	g	97148	1.042	0.2974	+	+--+-+-+-+-++++-+-+--+-?+	0.0052	0.0057
34053	rs10106196	a	g	100184	0.102	0.9185	+	-+--+--++++-+-+-++---+++-	0.0016	0.0054
34054	rs1010620	t	c	100184	-0.774	0.439	-	++--++-+-++---+++--+-+--+	-0.0057	0.0058
34055	rs10106201	a	c	100184	0.812	0.4171	+	+++++++-----++-++++-+-+++	0.0042	0.0058
34056	rs10106202	t	c	100184	-0.7	0.4837	-	-+--++--+--+-++--+-------	-0.0026	0.0064
34057	rs10106204	c	g	100184	0.674	0.5001	+	+----++--+++----+++--+++-	0.0037	0.0063
34058	rs10106205	t	c	100184	-1.365	0.1723	-	----+-+--+-+++-+---+---++	-0.012	0.0091
34059	rs10106206	t	c	100184	-0.352	0.7251	-	+---+----+-++-+----+-++++	-0.0029	0.0064
34060	rs10106207	t	c	100184	1.362	0.1731	+	--++++-++-+-++++-++-+++++	0.0076	0.0051
34061	rs10106208	a	g	100184	-0.507	0.612	-	---+---+++------+++-----+	-0.0045	0.0092
34062	rs1010621	t	c	36641	0.756	0.4495	+	-??+??????-??+?-????+-??-	0.0117	0.0098
34063	rs10106213	t	c	100184	0.25	0.8028	+	-+++---+-------++--+--+++	0.0014	0.0053
34064	rs10106215	t	g	96000	1.869	0.06162	+	+++-+-+++++++++++-?++-++-	0.0094	0.0053
34065	rs10106218	a	g	100164	-0.314	0.7535	-	--+---++--+++++++--+++-+-	-6e-04	0.0071
34066	rs10106222	a	t	100184	1.294	0.1956	+	+--+----+--++-+++--++++++	0.0064	0.0051
34067	rs10106223	c	g	95123	1.223	0.2213	+	-+++---++--+-+??---+-+++-	0.0183	0.0132
34068	rs10106226	t	c	10254	-1.069	0.2849	-	?????????????-??????++???	-0.0162	0.0154
34069	rs10106229	a	g	95979	0.232	0.8167	+	+-++++-------++++-?--+-++	1e-04	0.0065
34070	rs1010623	t	c	98656	-0.948	0.3434	-	---+-++-++---+---+++++---	-0.0054	0.0052
34071	rs10106243	a	g	100184	-0.755	0.4504	-	--++++++---+---+---+++--+	-0.005	0.008
34072	rs10106247	c	g	100184	-1.679	0.09311	-	-------++---+--+---++-+-+	-0.0082	0.0053
34073	rs10106248	a	c	7806	0.832	0.4051	+	?????????????+???????????	0.0216	0.0258
34074	rs1010625	t	c	100184	-1.079	0.2805	-	-------+---+--+-++-++--+-	-0.0063	0.0061
34075	rs10106252	t	g	100184	0.345	0.7299	+	---++-+++++-+-+++-+--++++	0.0021	0.0052
34076	rs10106255	a	g	100184	0.205	0.8374	+	-+---+-+----+++++++-+++++	0.0037	0.0138
34077	rs10106257	t	c	97148	-0.362	0.7174	-	+---+++---+-++++-++--++?-	-0.003	0.0053
34078	rs1010626	t	c	96000	0.791	0.4288	+	+---++-+-+++-++--+?-+--++	0.0044	0.0054
34079	rs10106265	a	g	100184	-0.324	0.7459	-	+----++-+--++++-+-+--+-+-	-0.0029	0.0051
34080	rs10106268	t	c	100172	-0.141	0.8882	-	+----+-+++-++-+-+-+---+--	-0.0018	0.0051
34081	rs10106269	t	c	100184	1.117	0.264	+	+++++-+++++-+++---++-+++-	0.0069	0.006
34082	rs1010627	a	c	100184	0.779	0.4358	+	--++--+-+--+++---++-+-++-	0.0056	0.0058
34083	rs10106271	a	t	100178	0.119	0.9051	+	+++--+-+-+--+-++---++--+-	5e-04	0.0067
34084	rs10106273	t	c	100184	0.294	0.7684	+	-+--++-----+-+---++--+---	0.003	0.0092
34085	rs10106275	a	g	100178	1.696	0.08994	+	+-+-++----+++++---+-+-+--	0.0076	0.0051
34086	rs10106278	a	g	100047	-0.217	0.828	-	+-+-+++-+-+++-++---+---++	-0.002	0.0057
34087	rs10106279	t	c	100184	0.11	0.9123	+	-+++++-++-+--++---+----+-	0.0014	0.0089
34088	rs1010628	a	g	100184	0.825	0.4095	+	--++--+-+--+++---++-+-++-	0.0059	0.0057
34089	rs10106280	a	t	100184	0.295	0.7684	+	++--+++++--+---+-+--++---	0.0015	0.0076
34090	rs10106283	a	c	100184	-0.667	0.5051	-	+-------+++--++-+-+-+++--	-0.0048	0.0055
34091	rs10106284	a	g	100181	-0.72	0.4714	-	-----+++---++--++--++++--	-0.0027	0.0062
34092	rs10106287	t	c	2434	-0.021	0.9831	-	????????????????????+-???	0.0029	0.1086
34093	rs1010629	t	c	100184	-0.763	0.4455	-	++--++-+-++---+++--+-+--+	-0.0055	0.0058
34094	rs10106292	t	c	100184	-1.23	0.2186	-	-++-+++++-----++-----++-+	-0.0057	0.0052
34095	rs10106294	a	g	100184	-0.544	0.5864	-	+---++-+--+-+-+--+++-+-++	-0.0038	0.0062
34096	rs10106295	t	g	87742	-0.307	0.759	-	+++---+-+---+--?-+?+----+	-0.0077	0.0159
34097	rs10106296	a	g	100128	-0.015	0.9881	-	+-+-+--++----++---+++--+-	-0.0016	0.0058
34098	rs10106297	a	g	100184	0.247	0.805	+	++----+++--++-+--+++--+--	-1e-04	0.0109
34099	rs10106298	a	g	100184	-0.538	0.5906	-	++-+---++++-----++-++-+--	-0.0029	0.0053
34100	rs10106300	a	c	10251	-0.119	0.9055	-	?????????????-??????--???	-0.002	0.0159
34101	rs10106301	a	t	92326	-1.644	0.1003	-	+?--+-+-+-+-+---+-+-++---	-0.0136	0.007
34102	rs10106305	t	g	94669	-0.5	0.6168	-	+---++--+--++-??++--++-++	-0.0137	0.0208
34103	rs10106306	t	c	86229	-0.699	0.4843	-	-+-++-+--+--++??-+-+++-?-	-0.0106	0.0221
34104	rs10106309	a	t	100184	0.684	0.4941	+	++-++-+---++-+---+--++++-	0.0034	0.0062
34105	rs10106310	t	c	100114	0.625	0.5322	+	+++--+-+++-+-+-+-+++-+--+	0.0036	0.0064
34106	rs10106312	t	c	83507	-0.207	0.836	-	?--+?---?+?+-+?+----?--+?	-0.0064	0.0275
34107	rs10106317	c	g	100184	0.578	0.5632	+	--++-+--++++++---+-++--+-	0.0047	0.008
34108	rs1010632	t	g	58989	-2.184	0.02895	-	?-?-+---++--+???--?+??-??	-0.0516	0.0247
34109	rs10106322	a	g	100172	1.343	0.1794	+	+---------++++----++-++-+	0.0059	0.0052
34110	rs10106323	a	g	97130	0.461	0.6448	+	+++++++++---+-++-+-+---?+	0.0031	0.0064
34111	rs10106324	a	g	100184	0.396	0.6918	+	-++-++-+----++---+-+-+++-	0.0031	0.0058
34112	rs10106327	a	c	7806	0.961	0.3368	+	?????????????+???????????	0.0178	0.0185
34113	rs10106329	a	g	98261	-0.964	0.335	-	++--++--+-+-?--+--++++++-	-0.0109	0.0087
34114	rs10106330	a	g	2449	0.867	0.3858	+	????????????????????-+???	0.0269	0.03
34115	rs10106334	c	g	100158	-0.727	0.4673	-	-+--+-++--++----++----++-	-0.0028	0.0057
34116	rs1010634	t	c	89833	-0.535	0.5926	-	--+++-+---+-+-+?++?-+-+?-	-0.0013	0.0111
34117	rs10106340	t	c	100121	-0.664	0.5064	-	--++---++--+---+++--++-++	-0.0028	0.0051
34118	rs10106342	t	g	100150	0.239	0.8114	+	++----+----+-+-+++----++-	8e-04	0.0058
34119	rs10106346	t	c	100184	1.628	0.1035	+	-+++-++++-++--+-+++++++++	0.0101	0.0061
34120	rs10106347	a	g	100184	-0.351	0.7252	-	-++-+++-+-----+++----+-+-	-0.0016	0.0076
34121	rs10106352	t	c	100184	-1.47	0.1416	-	-+------+-+---+-++++-+--+	-0.0079	0.0053
34122	rs10106353	a	c	100184	-1.589	0.1121	-	-+------+-+-+-+-------+--	-0.0116	0.0076
34123	rs10106354	t	c	100184	1.168	0.2429	+	++++---+++----+-+-+-++--+	0.0064	0.0063
34124	rs10106356	t	c	100184	-0.311	0.7556	-	++-+-+-++-----++--+-++---	-0.0022	0.0051
34125	rs10106358	a	c	100184	0.72	0.4717	+	--+++-+-+---++-+--+++++-+	0.0043	0.0052
34126	rs10106360	t	c	97148	0.168	0.8666	+	------++++--++++++--+--?+	0.0021	0.0073
34127	rs10106363	a	g	100184	0.916	0.3595	+	+----+--+-+++--++++-+++++	0.0054	0.0064
34128	rs10106364	a	g	100184	-1.098	0.2721	-	++--+--++++-+----++---+-+	-0.0059	0.0051
34129	rs10106365	a	g	100184	0.596	0.5514	+	++++-++++-+-------+--++++	0.0033	0.0057
34130	rs10106366	a	g	96000	1.554	0.1201	+	-+-+++-++++--+-+-+?++----	0.0132	0.0072
34131	rs10106369	t	g	52718	0.75	0.4535	+	--?+?+?--++?++??-+?++--??	0.0287	0.0335
34132	rs10106376	t	g	7806	-0.593	0.5529	-	?????????????-???????????	-0.0117	0.0196
34133	rs10106377	t	g	89259	-2.258	0.02394	-	+-+--+-++++---??+--+----+	-0.0271	0.0121
34134	rs1010638	a	c	100184	0.176	0.8606	+	+++--+++--+--++---+--+-+-	5e-04	0.0051
34135	rs10106381	a	c	100176	-0.101	0.9195	-	-++++--++++-+----+--++-+-	2e-04	0.0057
34136	rs10106384	t	c	100184	0.46	0.6452	+	-+--++-----+-+---++--+---	0.0049	0.0092
34137	rs10106386	t	c	100184	0.584	0.5592	+	+---+++-++++++-++-+--+++-	0.0028	0.0052
34138	rs10106387	t	g	100168	-1.424	0.1544	-	-+--+--+--+-----++-++++-+	-0.0067	0.0053
34139	rs10106388	a	c	100184	-1.427	0.1536	-	+-+--+-+-+----+--+-+-----	-0.0082	0.0062
34140	rs1010639	c	g	96953	0.472	0.6372	+	-+----+++-++?+--++---++-+	0.0041	0.006
34141	rs10106390	t	c	97063	-2.291	0.02194	-	+-+-----+-----+?++----++-	-0.014	0.0059
34142	rs10106391	c	g	100184	-0.031	0.9755	-	+++-+-+++++++----+-++---+	5e-04	0.0055
34143	rs10106393	a	g	100120	0.681	0.4959	+	+--++-++-+---+++-+-+-+-++	0.0023	0.0057
34144	rs10106398	c	g	100184	-1.129	0.259	-	++---+-+++------+-++--+--	-0.0084	0.0073
34145	rs10106400	t	c	100184	-0.138	0.8902	-	-++----++-+-+--+---+++---	-2e-04	0.0177
34146	rs10106405	t	g	100184	-0.545	0.5855	-	+--+---+----+++-+-++--++-	-0.0041	0.0058
34147	rs1010641	c	g	100184	0.154	0.8777	+	+++-+++----+-+----++++--+	-0.0016	0.0059
34148	rs10106410	a	g	100184	-0.597	0.5504	-	++--++-+-+-++-+---+--+--+	-0.0038	0.0054
34149	rs10106413	t	c	100184	0.151	0.88	+	---+--++++--++++++--++++-	0.002	0.0088
34150	rs10106418	a	g	100178	0.196	0.845	+	+-+-+-++-+----+++-+++-+-+	3e-04	0.0057
34151	rs10106419	a	g	100184	-0.087	0.9305	-	++--++++----+-+-+++-+-+--	-0.0013	0.018
34152	rs10106420	t	c	100184	-0.567	0.571	-	+-++-+----+++-+--+-----++	-0.0053	0.0077
34153	rs10106421	a	g	100184	-1.423	0.1546	-	+-+-+-----+-+---+-++-+-+-	-0.0089	0.005
34154	rs10106425	a	g	97148	0.331	0.7404	+	----+-++--++-+--+-++-+-?+	0.0025	0.0097
34155	rs10106426	t	g	100120	0.033	0.9735	+	--+---+-+---++-+++++-+-+-	-1e-04	0.0052
34156	rs10106429	a	g	67195	0.013	0.9893	+	++++-++-+--?+-??+++--++-?	0.0026	0.0204
34157	rs1010643	a	t	100184	-0.148	0.8826	-	---+----+++-+-++++----++-	0.0012	0.0058
34158	rs10106438	t	c	95021	-2.038	0.04152	-	-----+-+------??--+++-+-+	-0.0261	0.0138
34159	rs1010644	c	g	100176	0.906	0.3649	+	+---+-++++-++---++++++-+-	0.0038	0.0061
34160	rs10106441	t	c	100184	-0.266	0.7906	-	++-+----+-+++-++++---+-++	-0.0015	0.0058
34161	rs10106447	t	c	100184	-0.706	0.4802	-	+++-----++++-+--+---+-+-+	-0.0034	0.0052
34162	rs10106456	t	c	100184	0.286	0.775	+	++-+-++++++---+++-+--++--	0.0015	0.0103
34163	rs10106459	t	g	100175	-0.345	0.7298	-	+----++--+-+---++++++-+-+	-0.0036	0.0052
34164	rs1010646	a	t	100184	-2.55	0.01079	-	------+---+---+---++-++--	-0.0137	0.0054
34165	rs10106460	t	c	100098	-1.393	0.1637	-	+++---+---++-------+-+--+	-0.0105	0.0063
34166	rs10106461	t	c	100184	0.376	0.7065	+	+-++--++---+++---+-+++---	0.0013	0.0052
34167	rs10106462	a	c	7806	-0.391	0.6956	-	?????????????-???????????	-0.0091	0.0232
34168	rs10106463	a	g	70782	-0.244	0.807	-	?++-?-+--++--+??-????????	-6e-04	0.0264
34169	rs10106469	c	g	100184	-2.347	0.01891	-	---+----++----+-+--+-+++-	-0.0202	0.0091
34170	rs10106473	a	t	100184	0.24	0.8105	+	++++---++-+----+--+-+-+-+	4e-04	0.0065
34171	rs10106475	t	c	100184	-0.112	0.9109	-	-++--++++--+------++--+-+	-0.0013	0.0073
34172	rs10106476	t	c	100184	1.821	0.06866	+	++-+++-++--+++--++---++--	0.0148	0.0082
34173	rs10106478	a	g	17570	1.955	0.05063	+	?++???-+????+????????????	0.1867	0.0942
34174	rs10106483	t	c	100184	-0.802	0.4224	-	+-++--+--++---++-+-+-+---	-0.0066	0.0066
34175	rs10106488	a	g	100184	-1.679	0.09307	-	++-----+-----+-+++-+++--+	-0.0091	0.0051
34176	rs10106496	c	g	99901	-1.12	0.2627	-	---+-+---++++---+--+--+-+	-0.0112	0.0096
34177	rs10106497	t	c	100184	-0.416	0.6774	-	+-+-+-+++-+-+----+-++---+	-0.0022	0.0051
34178	rs1010650	t	c	100184	0.879	0.3792	+	++-------+++-++++--+++-++	0.0033	0.0051
34179	rs10106504	a	g	100168	1.251	0.2111	+	+--+--+-+-++-+++++----++-	0.0057	0.0051
34180	rs10106505	t	c	100183	1.689	0.09115	+	++++++----+++-++-+-+++-+-	0.0088	0.0052
34181	rs10106506	t	g	97063	0.623	0.5334	+	++-++-+-+--+-+-?+--++++--	0.007	0.0098
34182	rs1010651	a	c	1940	-0.096	0.9236	-	??????????????-??????????	-0.0044	0.0458
34183	rs10106512	t	g	2404	-0.654	0.5134	-	????????????????????-+???	-0.0212	0.0355
34184	rs10106513	t	c	100184	-0.295	0.7682	-	++-----+-----++--++---+++	-0.0028	0.0052
34185	rs10106515	a	t	100090	-1.512	0.1305	-	-+---++-+++------+++--+--	-0.0095	0.0072
34186	rs10106516	t	c	100184	0.22	0.826	+	-+-+++-+---+---++-+---+++	0.0025	0.0072
34187	rs10106518	c	g	7806	-0.271	0.786	-	?????????????-???????????	-0.0063	0.0232
34188	rs1010652	c	g	100184	-1.69	0.09096	-	---+------+----+----+++--	-0.0094	0.0062
34189	rs10106520	a	g	8746	0.766	0.4437	+	???+????????+????????????	0.1079	0.1249
34190	rs1010653	t	c	100184	-0.152	0.8789	-	++++------+++++-----+-+++	-9e-04	0.0052
34191	rs10106530	a	c	100161	-0.921	0.3573	-	-++--+-++----++--+-+-+-+-	-0.0052	0.0069
34192	rs10106531	a	g	100184	-3.1	0.001937	-	+---------------++-++--+-	-0.0296	0.0085
34193	rs10106532	a	c	91187	0.492	0.6227	+	---++-+-++-++-+?--+-+--++	0.017	0.0234
34194	rs10106534	t	c	44794	-0.211	0.8332	-	?++??++?+-??---?++????+?-	0	0.0193
34195	rs10106536	t	c	100184	0.566	0.5713	+	----+---+--+++-+++-+-+-+-	0.0062	0.0083
34196	rs10106538	t	c	98506	-0.499	0.618	-	+--++++---+-?-+-+++-+-+-+	-0.0038	0.006
34197	rs1010654	t	c	100184	-0.045	0.9642	-	+----+-++++--+-+++-----++	-0.0019	0.0107
34198	rs10106540	a	g	100184	-0.075	0.9405	-	+-+--+--++--++++-+-+++-++	-0.0014	0.006
34199	rs1010655	a	t	100181	0.628	0.5301	+	+++++-++---++++---+--+---	0.004	0.0082
34200	rs10106550	a	t	92000	0.214	0.8308	+	?-++++-+---+-+?+---+++-?-	0.0033	0.0168
34201	rs10106552	t	c	100184	0.266	0.7904	+	++-++--+++----+-+++--++++	1e-04	0.0063
34202	rs10106553	a	g	100129	-0.963	0.3358	-	+-----+--+++---++--++-++-	-0.0057	0.0055
34203	rs10106554	t	c	100161	0.419	0.6751	+	--++-+++-++++-+--++-+----	0.0024	0.0051
34204	rs10106557	a	c	100184	-0.536	0.5918	-	++---++-+-+-------+-++--+	-0.0043	0.0052
34205	rs10106558	a	c	100175	-0.747	0.455	-	+--++-+--+++--+-++--++---	-0.0042	0.0062
34206	rs1010656	a	c	94811	-0.187	0.8514	-	--+-++?-+-+++--+-+--+-+?+	4e-04	0.0091
34207	rs10106560	t	c	100184	-0.154	0.8774	-	-+--+-+++----+++--++-++--	-5e-04	0.0062
34208	rs10106561	a	c	100184	0.751	0.4528	+	+--+-++-++--++-+--+-+++--	0.004	0.0062
34209	rs10106564	t	c	100184	0.086	0.9316	+	--+-++--++---++++--++--++	5e-04	0.0073
34210	rs10106566	t	c	100184	-1.916	0.05532	-	--++--+--+--+-++++---++--	-0.0093	0.0051
34211	rs10106568	t	c	59403	-1.057	0.2907	-	---++??--?+?-+??-++?-+??-	-0.0236	0.0287
34212	rs1010657	a	g	100184	1.104	0.2698	+	-+-++-+++-+-+-++++-+++---	0.0065	0.0052
34213	rs10106570	a	g	96976	1.097	0.2728	+	-++++--+---++--++-+---+?+	0.0063	0.0053
34214	rs10106572	a	g	100171	-2.074	0.03808	-	-+--+--++-+-+----+-----+-	-0.012	0.0069
34215	rs10106574	a	g	100184	1.745	0.08092	+	++++-+++++++++---++++-+-+	0.0263	0.0149
34216	rs1010658	t	c	95992	0.69	0.49	+	-++++-+-+-++-+++-+?-+++++	0.0043	0.0059
34217	rs10106585	a	t	100184	-0.138	0.8901	-	-+-++-+----+++-+-++++---+	1e-04	0.006
34218	rs10106587	a	c	100184	-0.538	0.5905	-	-+--++-+-++-+----+++++-+-	-0.0029	0.0057
34219	rs10106592	t	c	100184	-0.064	0.9492	-	+-++-+-+---+-+--+--+++--+	-4e-04	0.0054
34220	rs10106600	t	c	100184	-0.041	0.9672	-	-++-++-+--+-+-++---+---++	0.0017	0.0072
34221	rs10106601	t	c	100184	-0.697	0.4861	-	+++-----++++--+------++++	-0.0046	0.0064
34222	rs10106605	a	g	100184	0.297	0.7662	+	-+-++--+-----+++++-+-+--+	0.0017	0.0054
34223	rs10106608	a	g	94614	-0.07	0.9444	-	-----++++-----+?--++??+-+	-7e-04	0.0158
34224	rs1010661	c	g	100184	-1.165	0.2441	-	---+-++++++-----+--+++---	-0.0056	0.0073
34225	rs10106611	a	g	7806	1.684	0.0921	+	?????????????+???????????	0.0289	0.0171
34226	rs10106619	t	c	100184	1.716	0.08615	+	++-+++++-++++++-+-+++-+--	0.0101	0.006
34227	rs1010662	t	c	100184	-0.604	0.5462	-	+++-+-+++-+---+--++-+--++	-0.0053	0.0071
34228	rs10106620	t	c	100184	-0.182	0.8555	-	----+------+++++++-+++---	0	0.0051
34229	rs10106622	t	c	100184	0.168	0.8668	+	-++++--++-+-+--++--+++--+	0.0021	0.0094
34230	rs1010663	a	g	100184	-0.61	0.5416	-	---+++--++-++--+---+--++-	-0.0031	0.0052
34231	rs10106631	a	g	100172	0.746	0.4558	+	-++-+-+++--++--++-+-++++-	0.0068	0.0084
34232	rs10106637	a	g	100184	-0.027	0.9788	-	+--+++--++-+++-+---+-++--	-6e-04	0.0053
34233	rs10106638	t	c	87108	0.712	0.4766	+	-+?++--+----?+-++-?-++-++	0.0112	0.0158
34234	rs1010664	t	c	95978	2.436	0.01487	+	+-+-+++++-++++-++-?-++-++	0.0363	0.0152
34235	rs10106643	a	c	9751	-0.343	0.7316	-	?????????????+??????--???	-0.0329	0.0475
34236	rs10106644	t	c	92777	0.36	0.7187	+	++++++++-?+--+??-+-+-+-+-	0.0037	0.0129
34237	rs10106649	a	g	91205	0.424	0.6715	+	---++-+-+-+++-+?--+-+--++	0.015	0.0233
34238	rs1010665	a	g	98470	0.006	0.995	+	-+-++++-+----+-+--------+	6e-04	0.0051
34239	rs10106652	a	g	100184	0.977	0.3284	+	+++-+-++++-+-+-++--+++--+	0.0055	0.0062
34240	rs10106654	a	c	100184	-0.028	0.978	-	-+-++-+-+--++-+----++++--	6e-04	0.0068
34241	rs10106658	t	g	100184	2.641	0.008271	+	+++++++++++--++-++-+-+-++	0.0137	0.0051
34242	rs1010666	a	g	10205	1.479	0.139	+	?????????????+??????+-???	0.0228	0.0153
34243	rs10106661	a	g	100184	-0.744	0.4568	-	---+-+-+++-----+++--+----	-0.0038	0.0078
34244	rs10106668	t	c	60803	1.016	0.3094	+	-+-+?+---+-?-+??+++0+++??	0.029	0.0278
34245	rs1010667	a	t	93067	-0.742	0.458	-	--?++----+-+--+---?-+-+++	-0.004	0.009
34246	rs10106671	c	g	100177	0.57	0.5688	+	++++----+-+-++-+-+----++-	0.0027	0.0052
34247	rs10106674	a	g	100184	0.812	0.4166	+	---++----+---+--+-++++++-	0.0053	0.0076
34248	rs10106675	t	c	100184	0.247	0.8049	+	++-++-+++-+-++--+-+-++--+	0	0.0053
34249	rs10106678	t	c	97106	-0.95	0.3423	-	--+++-+-+---++--+-+----?+	-0.0048	0.0053
34250	rs10106679	t	c	100184	-0.439	0.6608	-	+--++--+-+-+-+----+---+-+	-0.0042	0.0154
34251	rs1010668	t	g	93067	0.277	0.7817	+	++?--++++-+-+--+++?+-+---	-3e-04	0.0087
34252	rs10106681	a	g	100156	-0.985	0.3245	-	++-++++-+-+----++++--+--+	-0.0055	0.0053
34253	rs10106686	t	c	100184	0.33	0.7413	+	--+-+-++-----++++--+-++--	0.0065	0.0098
34254	rs1010669	a	g	100163	1.721	0.08531	+	-+-+---+-+-+++-++--+-++--	0.009	0.0051
34255	rs1010670	t	c	10236	-1.389	0.165	-	?????????????-??????-+???	-0.0214	0.0154
34256	rs10106702	c	g	100184	0.25	0.8023	+	-++-++-+--+---++++-++-+-+	0.002	0.0058
34257	rs1010671	t	c	98656	0.696	0.4862	+	-+++++-+++-+--+++--+----+	0.0062	0.0055
34258	rs10106717	t	c	97148	-1.587	0.1124	-	---+-----+-+---+++++--+?+	-0.0095	0.0065
34259	rs10106725	a	g	100184	-1.04	0.2983	-	++--++--++---+-++--++---+	-0.0057	0.0053
34260	rs10106730	t	c	100167	1.107	0.2683	+	++++---+++----+-+-+-++--+	0.006	0.0063
34261	rs10106732	t	c	100184	-0.525	0.5996	-	++-+-+-++-+-+--+++-------	-0.0035	0.0053
34262	rs10106735	a	g	69312	-0.182	0.8554	-	--+-?++++++?-+?-+----+++-	-0.0037	0.0218
34263	rs10106736	t	c	100184	0.234	0.8151	+	++-+-+++++--+---+++----++	-4e-04	0.0067
34264	rs1010674	t	c	36636	-0.288	0.773	-	+??+??????-??-?+????--??-	-0.0048	0.0105
34265	rs10106740	a	g	100184	-0.649	0.5164	-	--+-+++++++-+--+++-++-+++	-0.0032	0.006
34266	rs10106742	a	c	100184	1.526	0.1271	+	+-+++--+---++++++---++-++	0.0096	0.0072
34267	rs10106743	t	c	100184	1.903	0.05706	+	++-++++++--+-+++++++-++++	0.012	0.0074
34268	rs10106748	a	g	100184	0.575	0.5656	+	-+++-++----+-+-++---+++--	0.0047	0.0057
34269	rs10106750	a	g	100125	-1.126	0.2601	-	+--++-+-------+--++++-+--	-0.0074	0.0051
34270	rs10106752	t	c	100184	1.023	0.3063	+	+++-+++++++--+---+--++---	0.0048	0.0053
34271	rs10106754	a	g	100153	1.563	0.118	+	-+++++-++--++++--+--+++-+	0.0169	0.0085
34272	rs10106755	t	c	100129	0.284	0.7768	+	--++++--++++-+-+----+---+	0.0023	0.0053
34273	rs10106756	a	g	100184	-1.301	0.1932	-	---++----++-+-+--+++-++--	-0.0082	0.0082
34274	rs10106758	a	g	100165	-0.015	0.9879	-	++--+--+++++----+-++----+	-9e-04	0.0058
34275	rs1010676	t	c	94541	0.675	0.4996	+	?+-+-+-+++++--++--++---?-	0.0035	0.0054
34276	rs10106769	c	g	4880	1.078	0.2809	+	?????????????????-??+??+?	0.1156	0.1178
34277	rs10106770	t	c	100179	0.249	0.803	+	++++--------+-+-+-++++--+	-2e-04	0.0054
34278	rs10106772	a	g	100184	-0.008	0.994	-	-+--++--++++-++++-----++-	0.0039	0.0138
34279	rs10106773	a	g	100184	2.494	0.01262	+	+++++++--+---++--++++-+-+	0.0154	0.0066
34280	rs10106774	t	c	100184	1.334	0.1822	+	--++++++---+-+-+-+-++--++	0.0096	0.0067
34281	rs10106778	t	c	100183	-0.519	0.6038	-	-++---+---++-+--+-----++-	-0.0039	0.0111
34282	rs10106780	t	c	49480	0.43	0.6674	+	+-???-?-?++?-+??++??+-??-	-0.004	0.0248
34283	rs10106782	a	g	92345	-0.832	0.4053	-	-?+--+---++---+---+-++-++	-0.0039	0.0053
34284	rs10106783	a	g	93913	-0.7	0.4838	-	?-+--++-++--+++-+--+--+??	-0.0113	0.0143
34285	rs10106784	c	g	100184	-0.31	0.7565	-	+---+-++-+-++--+-++-++-+-	-0.0024	0.0061
34286	rs10106787	t	c	100184	0.495	0.6203	+	--+++++-+++-++++---+-+++-	0.0031	0.0053
34287	rs10106791	t	c	100160	0.061	0.9514	+	-++++++-+--+-++-+--------	0.0027	0.0066
34288	rs10106793	t	c	100184	0.001	0.9991	+	++------++-+--+-+++-+--++	-0.001	0.0064
34289	rs10106795	a	g	7806	0.213	0.8315	+	?????????????+???????????	0.0061	0.0287
34290	rs1010680	t	c	100184	0.402	0.688	+	+-+-+-+-+-+---++-++++-++-	7e-04	0.0067
34291	rs10106801	a	c	9188	0.605	0.5451	+	??????????+??-???????????	0.0116	0.0173
34292	rs10106804	a	g	100184	-1.548	0.1215	-	+++-+----++---+----+-+---	-0.0107	0.0075
34293	rs10106805	a	t	100184	0.425	0.6705	+	+++++-+++-----++-++++---+	0.0021	0.0051
34294	rs10106809	a	g	38299	-1.653	0.09843	-	---++??--?+?-???-++?-+??-	-0.0521	0.0367
34295	rs10106815	a	g	100122	-0.193	0.8471	-	-----+-++-+--+++---++++++	-4e-04	0.0051
34296	rs10106816	t	g	100184	0.434	0.6646	+	+-+-+++++++-+++---++---++	0.003	0.0072
34297	rs10106817	t	c	100184	0.83	0.4066	+	++-++++++-+-+-+++++-+---+	0.0069	0.0082
34298	rs10106818	a	t	100184	0.425	0.671	+	+-+++++++-+++-+--+---++-+	0.002	0.006
34299	rs10106820	a	g	92311	-0.05	0.9599	-	+?-+++-+-+--++-+-+-++++--	-0.0013	0.0062
34300	rs10106823	t	c	100184	1.754	0.07941	+	++++++-++-++-+++----++---	0.0091	0.0051
34301	rs10106825	a	g	100184	1.158	0.2468	+	+-+--++-+--+-++++-+----+-	0.0089	0.0082
34302	rs10106826	c	g	100184	-0.528	0.5972	-	+--+----++----++---+--+++	-0.0112	0.0137
34303	rs10106827	a	c	100184	0.159	0.8736	+	+-++--+-+-+-++-+-+--+--+-	0.0011	0.0078
34304	rs10106828	a	g	90127	0.695	0.4869	+	-++++--+??-+++++-+?-??-+-	0.0148	0.025
34305	rs10106829	a	g	100184	-5.793	6.913e-09	-	----------+-+------+----+	-0.0362	0.0063
34306	rs10106831	a	g	88187	0.119	0.9056	+	-++++--+??-++-?+--?-??-+-	0.0013	0.0248
34307	rs10106834	a	g	100184	0.51	0.6103	+	-+-+-+--++-++-++++-----++	0.0065	0.0074
34308	rs10106837	t	c	100184	1.203	0.2291	+	+++-+-+---++----+-++++-+-	0.0081	0.008
34309	rs1010684	c	g	94472	-0.048	0.9619	-	--+--++---++++---+?++++--	6e-04	0.0054
34310	rs10106841	t	g	100184	0.866	0.3864	+	-+++++---++++--++-++-++-+	0.0052	0.0053
34311	rs10106845	t	g	100184	0.907	0.3642	+	---++++-++-+-+--++-++-++-	0.0074	0.0072
34312	rs10106847	c	g	100184	-0.953	0.3404	-	-++-++--+--+----++--++--+	-0.0058	0.009
34313	rs10106852	a	g	36641	-1.006	0.3144	-	-??+??????+??-?+????-+??-	-0.0033	0.0095
34314	rs10106853	t	c	100184	-0.961	0.3367	-	-++--------+-+-++---+----	-0.0027	0.0055
34315	rs10106855	t	c	100098	2.479	0.01317	+	++-+-+---+++++-+--++++--+	0.0139	0.0057
34316	rs10106856	t	c	100184	-0.831	0.4057	-	-+--+-+-------+-++++---++	-0.0049	0.0051
34317	rs10106858	t	c	100184	-1.695	0.09005	-	-----+--++--+-++--+-+--++	-0.0086	0.0052
34318	rs10106860	a	g	96000	-0.154	0.8774	-	+-+----+-+-+-+-+-+?+--++-	-0.0036	0.014
34319	rs10106864	a	g	100133	-0.379	0.7048	-	-+---++--+-+-++-+-+----+-	-0.0019	0.0054
34320	rs10106867	a	g	95917	0.086	0.9311	+	+-+----+-+-+-+-+-+?++-++-	-5e-04	0.0142
34321	rs10106868	t	g	12440	0.637	0.5244	+	???+????-+???????-??????+	0.0484	0.0559
34322	rs1010687	a	c	95232	-0.871	0.3836	-	--------??++----+++--++--	-0.0062	0.007
34323	rs10106875	c	g	99433	-1.644	0.1003	-	---++++--+--------+--+++?	-0.0108	0.0087
34324	rs10106878	t	g	100184	0.802	0.4224	+	+-++-+-+-+++--++----+---+	0.0075	0.0088
34325	rs10106879	t	c	93264	1.259	0.2079	+	+-?++--+?+?++++++++-+--?+	0.0229	0.0202
34326	rs10106880	a	t	100184	1.088	0.2767	+	+-++-+-----++++--+-+-++--	0.0073	0.0068
34327	rs10106881	t	g	100184	-1.183	0.2367	-	-++----++-------++-++---+	-0.0114	0.011
34328	rs10106885	c	g	97099	-0.085	0.932	-	-+++--++--+---++----+++?+	-1e-04	0.0052
34329	rs10106887	a	g	100184	1.009	0.3132	+	---++-++---+-+-+++----++-	0.0097	0.01
34330	rs10106890	a	g	12482	-1.796	0.07251	-	??+????-??????????-??+??-	-0.1339	0.0652
34331	rs10106895	t	c	100184	0.038	0.9697	+	++--++------+-+--++-+--++	-2e-04	0.0059
34332	rs10106897	a	g	100092	0.153	0.878	+	-----++-+-++-----++-++---	0.0011	0.0052
34333	rs10106898	t	c	100184	0.425	0.6711	+	-++---++--+++--+--++---++	0.0039	0.0087
34334	rs10106900	a	t	100184	2.041	0.04129	+	-+++---+-+++++-++-+-+-+++	0.0185	0.0089
34335	rs10106902	a	g	100184	-0.616	0.5379	-	--+-----++-+--+---+-++++-	-0.0046	0.0069
34336	rs10106904	t	c	100184	1.936	0.05286	+	++-+++++----+++----++++-+	0.0175	0.0089
34337	rs10106907	t	c	100172	0.085	0.9325	+	+-----+++++++-+-++---+++-	-2e-04	0.0051
34338	rs10106908	t	c	99463	-0.422	0.6731	-	+++-+++--+----+++---+---+	-0.0044	0.0073
34339	rs10106911	a	t	100184	0.891	0.3727	+	++++-+--++-+-++----++-+--	0.0044	0.0062
34340	rs10106912	a	g	100184	0.423	0.6725	+	+----+--+--+--+++++-+++++	1e-04	0.0059
34341	rs10106914	t	g	100184	-1.899	0.05762	-	++-------+-+----+--+----+	-0.0102	0.0051
34342	rs10106917	a	g	7806	-0.02	0.9837	-	?????????????-???????????	-8e-04	0.0407
34343	rs10106919	a	t	93686	-0.489	0.625	-	++------+-+--++?++-----?+	-0.006	0.014
34344	rs1010692	t	g	100184	1.059	0.2896	+	---+-+----+++++-+-+-++-++	0.0058	0.005
34345	rs10106920	a	g	100184	-0.307	0.7591	-	+--++-+++++-++----+-+--+-	-0.0035	0.0076
34346	rs10106921	t	c	87443	0.327	0.7433	+	-++-?+++?---+++++-++-++??	0.0113	0.0243
34347	rs10106923	c	g	100184	0.266	0.7903	+	+-+++-+-+-+-++++-+--+----	0.0035	0.0109
34348	rs10106924	t	g	100184	-0.459	0.6461	-	-++-+-+-+-+--++++--++++--	-0.0016	0.0059
34349	rs10106926	c	g	100184	-1.255	0.2093	-	----+-++--+-----+-+--+-+-	-0.0157	0.0123
34350	rs1010693	t	g	77530	0.522	0.6018	+	+-?--+?????+?++++-?+---?-	0.0044	0.007
34351	rs10106931	t	c	100184	0.971	0.3314	+	-----++-++++-+-++-+-+-++-	0.0065	0.0063
34352	rs10106941	t	c	97063	-0.588	0.5564	-	--++++--++--+-+?-+---+-+-	-0.0038	0.0097
34353	rs10106942	t	c	100184	-1	0.3172	-	-+--+++++--+--+-+--++-+-+	-0.0043	0.0057
34354	rs10106947	t	c	42470	-0.973	0.3306	-	+??-?+-???---??????-+?-??	-0.0435	0.0398
34355	rs10106958	a	g	100184	1.314	0.189	+	-+-++++-+++++-+++++--+-+-	0.0102	0.0055
34356	rs10106960	t	c	100171	0.061	0.9517	+	-+--+--++++-+-+-++---+++-	0.0012	0.0053
34357	rs10106961	a	g	100184	-0.505	0.6136	-	+-+--+++--+-+--++-----+++	-0.0053	0.009
34358	rs10106965	t	c	100184	-0.893	0.3716	-	---+----+++--+--+++++-+--	-0.0042	0.005
34359	rs10106967	t	g	100184	-1.285	0.1987	-	--+-++-+----++---++---+--	-0.0116	0.011
34360	rs10106972	a	g	62203	0.851	0.3947	+	+++++??--+??-+??++++??-?+	0.0305	0.0305
34361	rs10106977	a	g	100184	0.443	0.6577	+	+---+++++-+----++--++-+++	0.001	0.0066
34362	rs1010698	t	g	100184	-0.814	0.4158	-	+++++----+--+-+-+-+-++++-	-0.0044	0.005
34363	rs10106983	a	g	100184	1.096	0.2731	+	++++-++-++--+++--+---+-++	0.0062	0.0059
34364	rs10106985	a	t	18572	0.266	0.7899	+	?+?--???????????+-???????	0.025	0.0652
34365	rs1010699	a	g	97061	-1.499	0.1338	-	---+--------++-+----+--?+	-0.0099	0.0065
34366	rs10106994	a	g	100184	2.162	0.03064	+	-+-+-+++++++-+++-+-++-+-+	0.0121	0.0051
34367	rs10106995	t	c	70675	-0.497	0.6194	-	-+--++---++-+???-++?++--?	-0.0085	0.0153
34368	rs10106998	t	c	100181	0.219	0.8269	+	---+--++++-+--+-+++---++-	0.0023	0.0074
34369	rs10107	a	g	97148	-2.184	0.02895	-	-++-------+---++---+---?-	-0.0111	0.0053
34370	rs1010700	t	c	98656	0.637	0.5239	+	++-+-----+-+++----++---+-	0.0014	0.0052
34371	rs10107002	t	c	100184	-0.823	0.4104	-	-++++-+++-+-+----++---++-	-0.0039	0.0053
34372	rs10107003	a	g	9746	0.917	0.3593	+	?????????????+-??????????	0.0181	0.0219
34373	rs10107004	a	c	100184	-0.307	0.7589	-	+--+--++-+----++-++-+-+--	-0.0055	0.0091
34374	rs10107009	a	c	100184	0.529	0.5968	+	+-++-+-+-++-++-++-+-+-+--	0.0031	0.0063
34375	rs1010701	a	t	100184	0.71	0.4779	+	+---+-+--++--++++-+--+-++	0.003	0.0051
34376	rs10107010	a	c	100184	-0.233	0.8156	-	----++----+-++-+-+++---++	-0.0012	0.0051
34377	rs10107011	c	g	100184	-1.336	0.1817	-	--+-++++++--+-++----+-++-	-0.0058	0.0064
34378	rs10107017	a	g	100184	1.647	0.09965	+	--++-+----++-++-+++++-+++	0.0105	0.0065
34379	rs10107018	a	t	69164	0.09	0.9281	+	+-+++------?+++?+-+---+--	-0.0057	0.0197
34380	rs10107021	t	c	100184	0.56	0.5755	+	+++-+++-++++---+++++-+-++	0.0011	0.0051
34381	rs10107025	t	c	100184	0.958	0.3379	+	+-++--+--++-++-++-++++--+	0.0074	0.0105
34382	rs1010703	t	c	97148	-0.346	0.7296	-	-+-+----++--+++--+-+---?+	-0.0026	0.0086
34383	rs10107030	t	c	7806	0.086	0.9318	+	?????????????+???????????	0.0018	0.0213
34384	rs10107031	c	g	100184	0.492	0.6228	+	+-+++--++-+-+--+-+-++++-+	0.0025	0.0053
34385	rs10107032	a	g	100184	1.628	0.1036	+	+--+----++++-+-+--++++++-	0.0115	0.0085
34386	rs10107034	t	g	100184	-0.009	0.9927	-	+--++-++--+-+--+++++--+++	-0.0014	0.0065
34387	rs10107038	a	g	100184	1.502	0.1331	+	+-+++--+---++++++---++-++	0.0094	0.0072
34388	rs10107039	a	t	97146	-0.383	0.7016	-	+----+--++++-+-----+-++?+	-0.006	0.0122
34389	rs1010704	a	g	97148	-0.488	0.6258	-	-+-+----++--+-+--+-+---?+	-0.0038	0.0086
34390	rs10107051	a	g	100184	-1.126	0.2602	-	+-+-+-+-+-+-+-+++--+--++-	-0.0067	0.0062
34391	rs10107061	a	g	100184	0.171	0.8643	+	--+++---+++++-+--+-+++--+	0.0021	0.0052
34392	rs10107063	t	c	70288	0.551	0.5816	+	--++?++-???+-+??-+?-++-??	0.0203	0.033
34393	rs10107064	a	g	100184	-2.353	0.01864	-	-++-----+----+-+-+---++--	-0.0192	0.0084
34394	rs10107065	a	g	91745	-0.261	0.7941	-	-++-----+--+---?-??+-+---	-0.0073	0.02
34395	rs10107068	t	g	100184	-1.514	0.1299	-	+-+-+-----+-+---+-++-+---	-0.0095	0.0051
34396	rs10107069	a	g	100184	1.587	0.1125	+	-++-+++-++++++-++--++--++	0.0092	0.0058
34397	rs10107074	a	g	100180	-0.031	0.9753	-	++-++---++-++--+-------+-	-4e-04	0.0067
34398	rs10107077	a	g	98779	0.69	0.4901	+	+-?-+-++-+++-++++-+-+-++-	0.0049	0.0111
34399	rs10107086	t	c	100184	-0.036	0.9714	-	-+---++---+-+-+-+++--+-++	-3e-04	0.0107
34400	rs10107090	c	g	100140	0.39	0.6965	+	+++-++---++-+-+++-++++-+-	0.002	0.0055
34401	rs10107091	t	c	92348	2.934	0.003341	+	+++--??+++-++++?+--++-+++	0.0745	0.0266
34402	rs10107093	t	g	100184	-1.338	0.1808	-	--+-++-++-+---+---+-++-++	-0.0068	0.0051
34403	rs10107094	t	c	100184	0.238	0.8117	+	--++-----++-+++++-++--+--	0.0014	0.0055
34404	rs10107098	a	g	100184	0.418	0.6761	+	--+---+-++---++-+++---+--	0.0014	0.0052
34405	rs1010710	a	c	99157	-0.225	0.822	-	++---+++++--+--++-+---+--	-0.0012	0.0058
34406	rs10107103	a	t	95272	0.623	0.5335	+	--++-++++--+?--?++-+--+-+	0.0113	0.0145
34407	rs10107110	a	g	100184	-0.945	0.3449	-	-+------+---+--+-+-+++-++	-0.0069	0.0083
34408	rs10107115	a	c	100184	0.799	0.4242	+	++++--++-++++++-+++--++--	0.0039	0.0057
34409	rs10107117	a	g	92345	1.822	0.06847	+	-?-+++++-+++++-+--++++--+	0.0118	0.0062
34410	rs10107121	t	c	96000	0.577	0.5643	+	++-++++++--+------?+-+--+	0.007	0.0126
34411	rs10107122	a	g	100004	0.372	0.7101	+	+++-+-+--++++-+-++-++-++-	0.0025	0.007
34412	rs10107125	a	g	97148	-1.405	0.1601	-	+++---+---+--------+-+-?+	-0.0101	0.0063
34413	rs10107126	a	g	92879	0.775	0.4383	+	++++-++++-+---+?-+?0--+++	0.0134	0.0207
34414	rs10107128	t	c	100184	-0.388	0.6982	-	-++---++-++-+++---+--+---	-6e-04	0.0067
34415	rs1010713	a	g	100184	0.233	0.8158	+	+-+-+---++--+++--++-+++-+	3e-04	0.0095
34416	rs10107134	t	g	99434	0.738	0.4604	+	-++++--++-++---++-++++--?	0.005	0.0059
34417	rs10107135	a	t	100184	-0.004	0.9971	-	--++--+--++--+----++++-+-	-5e-04	0.0052
34418	rs10107136	t	c	87742	-2.537	0.01119	-	---++-++----+-+?--?-+----	-0.0338	0.0129
34419	rs1010714	a	t	100184	0.723	0.4696	+	++++-+-+-----++---+--+---	0.0038	0.0055
34420	rs10107145	a	g	100184	-0.702	0.4826	-	++---++-++-+-+--+--+-++--	-0.0038	0.0051
34421	rs1010715	t	g	22605	-1.782	0.0748	-	?-????--++??????--???++?+	-0.0614	0.0382
34422	rs10107153	t	c	95047	0.358	0.7205	+	-++-+-++++-++-+++++++--++	0.0049	0.0131
34423	rs10107154	a	t	96000	-0.862	0.3889	-	----+-----+-+-++++?+++---	-0.0043	0.0059
34424	rs10107157	t	c	96000	-0.475	0.6345	-	+++---+---+-++---+?------	-0.008	0.0145
34425	rs10107158	a	g	33057	-0.808	0.4188	-	-?++??-?-????-??+??-?-+??	-0.0251	0.0486
34426	rs10107159	t	c	100184	0.211	0.8332	+	---+---+++++-+-+---+--+-+	0.0013	0.0051
34427	rs10107160	t	c	100182	-0.375	0.7075	-	+----++--+-+---++++++-+-+	-0.0035	0.0052
34428	rs10107162	a	g	100184	-2.424	0.01535	-	----++---++--++-------+-+	-0.0156	0.0063
34429	rs10107166	a	g	39562	1.862	0.06267	+	?++?---+++??-+??-+++??+-?	0.0156	0.0081
34430	rs1010717	t	c	100184	0.537	0.5915	+	---+++-+++++------+++++++	0.0029	0.0057
34431	rs10107176	c	g	42471	0.969	0.3326	+	-??+?-+???+++??????+-?+??	0.0434	0.0398
34432	rs10107178	t	c	100184	-0.122	0.9032	-	-+++-----+-++++--++--+---	0.0015	0.0065
34433	rs10107180	a	c	100182	-0.121	0.9037	-	++++----------++--++-++-+	-0.0021	0.0059
34434	rs10107182	t	c	100173	-6.913	4.738e-12	-	+---+-+---+-----+----+--+	-0.037	0.0052
34435	rs10107188	t	c	7806	-0.765	0.4442	-	?????????????-???????????	-0.0247	0.0321
34436	rs10107190	c	g	100143	0.909	0.3632	+	-++-+---++++-++++++++++-+	0.0062	0.0066
34437	rs10107200	t	c	74839	-1.137	0.2554	-	---?-+?????+?-+-+-?+-----	-0.0069	0.0075
34438	rs10107202	t	c	58567	0.638	0.5235	+	--+?-+-+-++?++??--?+??-+?	0.0186	0.0203
34439	rs10107205	t	c	72457	0.627	0.5306	+	-??-?+-+-?+-?+??+++-+--+?	0.0225	0.0299
34440	rs10107209	t	c	96000	0.329	0.7424	+	-+--+++--+---++--+?+-++-+	0.0036	0.0059
34441	rs1010721	t	g	94472	-0.243	0.8083	-	-+-++-+++++--+-+--?+-+---	0	0.0065
34442	rs10107214	t	c	100184	-0.872	0.383	-	-++-----+++-------+------	-0.0049	0.0053
34443	rs10107215	t	c	100116	0.545	0.5859	+	+-+-++-+-+++---+-+++---++	0.0027	0.0058
34444	rs10107216	t	g	100183	0.112	0.9111	+	---+--+---++-+--++-+--++-	9e-04	0.0052
34445	rs10107218	a	g	100171	-1.637	0.1016	-	+++-+-+---+---------++++-	-0.0111	0.0069
34446	rs10107219	t	c	100184	-1.977	0.04809	-	+---+---+-+--+-----+--+-+	-0.0121	0.0059
34447	rs10107220	a	g	100184	-0.013	0.9898	-	+--++--+---+++--------+--	-6e-04	0.007
34448	rs10107223	t	c	100184	-0.134	0.8934	-	++++--++-++++--++----+--+	-6e-04	0.0072
34449	rs10107234	c	g	36641	-0.338	0.7357	-	-??-??????+??+?-????++??-	-0.0021	0.0095
34450	rs10107235	c	g	100184	-1.122	0.262	-	++-+++------+-+-+++---+--	-0.01	0.0095
34451	rs10107240	c	g	100184	0.738	0.4605	+	---++-++++-+++++-+-+-+-+-	0.0047	0.0052
34452	rs10107241	t	c	87742	-2.688	0.007183	-	---++-++----+-+?--?-+----	-0.0354	0.0127
34453	rs10107246	a	g	100184	-0.614	0.5389	-	+-++-+-+--+-------+-++-+-	-0.005	0.0072
34454	rs10107250	a	t	10252	-1.125	0.2605	-	?????????????-??????--???	-0.0549	0.039
34455	rs10107255	a	c	85059	-1.567	0.1171	-	+---?+--+++---+-++?++--?-	-0.0299	0.0202
34456	rs10107260	t	c	93052	-1.491	0.136	-	+--?-+--+-+---++--+++++-+	-0.0097	0.0061
34457	rs10107261	a	t	89986	-0.056	0.9555	-	+----++-++-+++??---+--++-	-0.002	0.0175
34458	rs10107269	t	c	30173	-0.265	0.7912	-	??-??????????-????+???--?	-0.0094	0.0432
34459	rs1010727	a	g	100184	2.63	0.008544	+	++--+-++++++-+++++++++-++	0.0145	0.006
34460	rs10107273	a	t	7806	-1.346	0.1784	-	?????????????-???????????	-0.0241	0.0178
34461	rs10107274	t	c	77172	-0.489	0.6247	-	++??-+-???-+?---++?+-+---	-0.0057	0.013
34462	rs10107278	a	g	100184	-0.986	0.324	-	++++----++---++-+--++-+--	-0.0056	0.0055
34463	rs10107279	t	c	95942	0.383	0.7018	+	++++-----+-+-+++++?+-+--+	0.0023	0.0058
34464	rs1010728	a	g	100184	1.199	0.2306	+	-++-+-+---++-+--+-+--+--+	0.0083	0.007
34465	rs10107281	a	g	97043	1.057	0.2903	+	--+-++-++-++-+-?++--+--++	0.0144	0.0103
34466	rs10107283	t	g	96760	1.936	0.05286	+	-+-+-+++??++-+++-+-++-+-+	0.011	0.0052
34467	rs10107284	a	g	100164	1.136	0.2561	+	--++-++----+-++++--+++-+-	0.0061	0.0051
34468	rs10107285	t	g	100054	-0.821	0.4114	-	----+++----+-+--+--++-+--	-0.0055	0.0083
34469	rs1010729	c	g	100171	2.733	0.006271	+	+++-----++++++--++--+--+-	0.0189	0.0069
34470	rs10107290	t	c	100184	-0.085	0.9321	-	-+--+-+++++----++---+++-+	5e-04	0.0076
34471	rs10107293	a	t	92306	-2.056	0.0398	-	+?--++-----+------------+	-0.0117	0.0059
34472	rs10107295	t	c	39562	-1.643	0.1004	-	?+-?+----+??-+??---+??-+?	-0.015	0.0089
34473	rs1010730	a	g	100126	0.017	0.9868	+	+----+-+++-++--++---++-++	7e-04	0.0065
34474	rs10107302	c	g	100184	-0.464	0.6425	-	+--++++--+--+-+--+----+--	-0.0042	0.0077
34475	rs1010731	t	g	100184	-0.324	0.7457	-	+-+----++---+--+-++---+-+	-0.0041	0.0084
34476	rs10107313	c	g	100184	-0.999	0.3178	-	---+----+--++-+-++-----+-	-0.0058	0.0057
34477	rs10107322	a	g	100184	-1.515	0.1298	-	-----++-+--+----+-+--++--	-0.0109	0.008
34478	rs10107324	t	c	10254	0.444	0.6571	+	?????????????-??????++???	0.009	0.0174
34479	rs10107339	t	g	100184	-0.65	0.5159	-	-++-+------+++-+-+--+-++-	-0.0026	0.0067
34480	rs10107340	t	g	100184	0.325	0.7454	+	+--++++-+----+-+--+--+-++	2e-04	0.0051
34481	rs10107345	t	g	100184	-1.133	0.2573	-	---+-------++++--+-+--++-	-0.0098	0.0081
34482	rs10107347	a	g	10253	0.266	0.7906	+	?????????????+??????--???	0.0041	0.0158
34483	rs10107348	t	c	90371	-0.427	0.6697	-	-?++++---++-++?-+-+-++---	-0.0022	0.01
34484	rs10107349	a	g	100184	-0.549	0.5829	-	-++++-+-+-+--++-++--+----	-0.0023	0.0052
34485	rs1010735	t	g	100184	0.094	0.9253	+	+-+++--++++-+-+-++++--+--	-8e-04	0.006
34486	rs10107351	a	g	100184	0.145	0.8848	+	-++--++--++--+-+----++++-	0.0033	0.0081
34487	rs10107356	a	t	100184	1.775	0.07594	+	+---+++-+++++-+--+++-+++-	0.0094	0.0053
34488	rs10107357	t	c	97148	0.439	0.6605	+	+-+--++-+++++-++---+--+?-	0.0016	0.0055
34489	rs10107359	a	g	100184	-0.574	0.5662	-	+--++++---+----+++++---+-	-0.0047	0.0072
34490	rs1010736	a	g	99212	0.528	0.5974	+	++-+--+-+++++----++-+++++	0.0032	0.0074
34491	rs10107363	c	g	100184	0.356	0.7221	+	++++---++-+----+--+-+-+-+	0.0017	0.0064
34492	rs10107364	a	g	97063	-0.779	0.4362	-	+-++-++--+---+-?+-+++++-+	-0.0104	0.0118
34493	rs1010737	t	c	90673	0.071	0.9434	+	-++?---+--+-?+++++-++--+?	0.0013	0.0091
34494	rs10107372	t	g	36641	0.021	0.983	+	-??+??????+??-?+????--??+	6e-04	0.0102
34495	rs10107374	c	g	100184	0.127	0.8988	+	+++--++-+++---+-++--+-+-+	0.001	0.0061
34496	rs10107379	t	c	100184	-1.213	0.2253	-	---+---+--++----+-+-++---	-0.0066	0.0062
34497	rs1010738	t	c	97069	-0.511	0.6094	-	---+-++-+-+---+-+-+-++-?+	-0.0038	0.0087
34498	rs10107381	a	t	1940	-0.205	0.8379	-	??????????????-??????????	-0.0095	0.0464
34499	rs10107382	a	g	100184	0.369	0.7121	+	-+--------+++-+++--+++++-	0.0033	0.0052
34500	rs10107384	a	g	100184	-0.048	0.962	-	++-+-+++-+-+--+-++-------	-0.0011	0.0053
34501	rs10107389	a	g	100112	-1.019	0.3084	-	+-+-+++--+----+++--+---+-	-0.0059	0.0057
34502	rs1010739	t	c	100171	0.666	0.5056	+	+-++-+++---+++-++-+--+-+-	0.0034	0.0057
34503	rs10107391	a	g	100174	1.621	0.1051	+	++-+-+-+--++++--++--+-++-	0.0102	0.0067
34504	rs10107396	t	c	100184	-0.712	0.4767	-	++---++-+--+------++++---	-0.0048	0.0052
34505	rs10107397	t	c	1459	0.434	0.6641	+	??????+??????????????????	0.1297	0.2972
34506	rs10107399	t	c	100184	-0.242	0.809	-	+----++--+-+---++++++-+-+	-0.003	0.0051
34507	rs1010740	t	c	100169	-0.657	0.5109	-	-+--+---+++---+--+-++-+-+	-0.0033	0.0057
34508	rs10107402	a	g	99463	-1.579	0.1143	-	+--+--+-----++--+--+-+++-	-0.014	0.0084
34509	rs10107403	a	g	100184	1.239	0.2154	+	+-+++--++++--+-+-+-+-++++	0.015	0.0138
34510	rs10107406	t	c	100184	-0.764	0.4446	-	-++-++----+++------+-+-+-	-0.0035	0.0053
34511	rs10107411	a	g	13595	0.238	0.8123	+	??????????+??+-?????+-???	0.0048	0.0135
34512	rs10107413	t	c	100146	-1.044	0.2964	-	+++-+-++---++----+--+++-+	-0.0058	0.0059
34513	rs10107414	a	g	11992	0.074	0.9409	+	??-+?????-??????-????-???	0.0045	0.0697
34514	rs10107415	a	g	100184	-0.257	0.7969	-	++-----++----+-+-+-++--++	-0.0046	0.009
34515	rs10107416	a	g	96754	1.055	0.2915	+	++-+-+-+??+-++----++++--+	0.0047	0.0052
34516	rs10107420	t	c	97148	0.381	0.7033	+	+--+--++-+++--+++-+---+?-	0.0023	0.0107
34517	rs10107423	a	c	7806	-1.785	0.07432	-	?????????????-???????????	-0.0489	0.0273
34518	rs10107424	a	g	100184	1.272	0.2034	+	++-+-++-+-++-+++-+-+++++-	0.01	0.0087
34519	rs10107425	t	c	100184	-0.257	0.7974	-	++++-+--+-+------+-++-+++	-0.0023	0.0052
34520	rs10107429	a	g	10235	-0.422	0.6727	-	?????????????-??????++???	-0.0063	0.0154
34521	rs1010743	a	c	100184	-0.768	0.4425	-	+++------+--++--++-------	-0.0038	0.0051
34522	rs10107432	a	g	100184	0.711	0.4773	+	++------++--++-+--+--++++	0.0034	0.0051
34523	rs10107433	t	c	2413	-0.921	0.3573	-	????????????????????-+???	-0.0401	0.0432
34524	rs10107434	t	c	100184	1.35	0.1772	+	-++--+-+-+++++-++----+-++	0.0088	0.0051
34525	rs10107440	t	g	100184	0.148	0.882	+	+-++-+--+-++--+++-+++--++	0.0017	0.0094
34526	rs10107444	t	c	98244	-1.099	0.2718	-	-+---++---+--+?+++-+-----	-0.0179	0.0181
34527	rs1010745	a	g	92964	0.356	0.7221	+	+---+-++---+++--++?+-++?+	0.003	0.0059
34528	rs10107450	t	c	100184	0.298	0.7658	+	---+-+-+++-----+++--+--++	0.0029	0.0064
34529	rs10107451	t	c	100184	0.392	0.695	+	+--+-+---+++++--++--+--++	0.0015	0.0062
34530	rs10107456	a	g	97063	0.939	0.3479	+	--++-++++--+++-?++-+--+-+	0.0155	0.0144
34531	rs10107458	a	g	97148	-1.311	0.1899	-	---+---+--+------+-++--?+	-0.0058	0.0061
34532	rs1010746	t	c	100176	0.405	0.6857	+	++---+--+++--+++++------+	0.0027	0.0051
34533	rs10107460	a	g	7806	0.626	0.5314	+	?????????????+???????????	0.0153	0.0243
34534	rs10107461	a	c	100184	0.605	0.5455	+	++-+++++++-+--+++---+-++-	0.0035	0.0058
34535	rs10107462	t	g	92470	0.105	0.9166	+	+--+?+-++--+--?--++--+-?-	0.0072	0.0185
34536	rs10107463	a	g	93913	0.817	0.4141	+	?+-++--+--++-+-+-++-++-??	0.0124	0.0139
34537	rs10107465	a	g	92638	0.241	0.8096	+	?--+-+-+--+++-??+-++-++--	0.0025	0.0077
34538	rs10107468	c	g	100184	0.001	0.999	+	+-+++----+-+---++++++---+	-8e-04	0.0113
34539	rs1010747	a	t	100161	-0.159	0.8735	-	++--++---+--+--++-++++-++	-0.0018	0.0069
34540	rs10107471	c	g	100184	0.788	0.4305	+	-++++++---++--+-+----+--+	0.0047	0.0053
34541	rs10107472	a	g	100184	-0.791	0.4287	-	------+-++++----+++--+++-	-0.0052	0.0057
34542	rs10107481	t	g	87558	0.082	0.9346	+	?-?+?++++++---?---?++-+++	0.0038	0.0252
34543	rs10107483	t	c	100184	-0.343	0.7315	-	++--+-++------+++-+--+--+	-0.0028	0.0082
34544	rs10107485	a	t	100184	-0.762	0.446	-	+---+--++---+-++--+-+-++-	-0.0052	0.0057
34545	rs1010749	a	g	96000	0.331	0.7408	+	+-++-+-+-+++++-++-?--+---	0.0039	0.0154
34546	rs10107492	a	t	100170	-0.449	0.6533	-	-+-++-+-+--+-+-+++-+-+-+-	-0.0011	0.0067
34547	rs10107497	t	c	100159	-0.833	0.4048	-	+-+-+++---+--+-++-+--+---	-0.0069	0.0065
34548	rs10107501	t	c	100184	-2	0.04553	-	+-------+++-----+--+-++--	-0.0111	0.0053
34549	rs10107505	a	g	97148	-0.17	0.8649	-	-------++++++++-----+++?-	4e-04	0.0062
34550	rs10107512	t	c	97148	0.763	0.4454	+	+-+-++---+-+-+--++-+++-?+	0.0035	0.0052
34551	rs10107514	c	g	100184	-2.745	0.006042	-	----+-+-+-+-+----+--+--+-	-0.0449	0.0164
34552	rs10107515	a	g	100175	1.136	0.2558	+	--++++-++---++++--+--+-+-	0.0076	0.0065
34553	rs10107516	a	g	27898	1.135	0.2564	+	?????????????+????-????+?	0.0227	0.021
34554	rs1010752	c	g	100176	0.094	0.9249	+	--+---+----+++----+---+--	0.0014	0.0138
34555	rs10107525	a	g	100184	-0.892	0.3722	-	-++----------+--++++-----	-0.0058	0.0064
34556	rs10107528	a	g	100184	0.738	0.4607	+	-+--+-++++++++++-+----+--	0.0101	0.0106
34557	rs10107533	a	c	92302	-1.263	0.2067	-	-?+-++--+---+--+-+++--+--	-0.0072	0.0069
34558	rs10107534	a	g	100184	0.748	0.4544	+	---++++-++-+-+--++-++-++-	0.0058	0.0068
34559	rs10107535	a	g	97063	-0.754	0.4508	-	++--+----++--++?--+-++-+-	-0.0132	0.0144
34560	rs1010754	a	t	23795	0.595	0.5518	+	????+??????+?????????????	0.0304	0.0336
34561	rs10107540	c	g	99203	0.903	0.3667	+	+---++---++-++-+-+---++-?	0.0067	0.0096
34562	rs10107544	t	g	100184	-1.744	0.08111	-	----+---------+++---++-+-	-0.0244	0.0143
34563	rs10107546	t	c	100184	0.015	0.9881	+	----+-+-++--+-+++---++++-	0.0015	0.0072
34564	rs10107549	t	c	100184	-0.577	0.5638	-	--++++-+-+---++++----+-++	-0.0031	0.006
34565	rs1010755	t	c	100184	-1.097	0.2725	-	-----+----++-----+++-+--+	-0.009	0.0083
34566	rs10107556	t	c	97148	1.279	0.2008	+	+-++-+-----++++--+-+-++?-	0.0084	0.0068
34567	rs10107557	t	c	100184	-0.252	0.8009	-	++-----++++--++--+-----+-	-0.0019	0.008
34568	rs1010756	t	g	100176	0.269	0.7881	+	+++-+-+--++++-+++----+---	9e-04	0.0057
34569	rs10107563	a	g	92795	-0.006	0.9953	-	+-++++-++--++--?-+?++-+++	-6e-04	0.0183
34570	rs10107565	a	g	100184	0.382	0.7025	+	++-+-+-+-++++-+-++-------	0.0024	0.0073
34571	rs10107566	a	c	100184	1.43	0.1528	+	++----+-++-+-++-++-+----+	0.0138	0.0095
34572	rs1010757	a	c	100157	-0.973	0.3304	-	----+----++---+----++-+--	-0.0052	0.0061
34573	rs10107571	t	g	1940	-0.335	0.7373	-	??????????????-??????????	-0.0161	0.0476
34574	rs10107573	a	g	100184	1.736	0.08259	+	++++++-+++++----++--++++-	0.0199	0.0113
34575	rs10107576	c	g	97063	0.969	0.3324	+	+++--+++-++--+-?+--++++--	0.0094	0.0078
34576	rs10107579	t	g	100184	1.05	0.2937	+	-+-+++---++++-+--+-+-----	0.006	0.0051
34577	rs10107581	t	c	100184	-2.735	0.006238	-	-++---+++---+--+-+++-+---	-0.0155	0.0062
34578	rs10107585	c	g	100184	2.294	0.02179	+	++++-++-+--+++-++-+-+--+-	0.0136	0.0062
34579	rs10107586	a	g	96760	1.065	0.2867	+	-+---++-??+-+++---++-++-+	0.0063	0.006
34580	rs10107588	a	c	7806	0.548	0.5835	+	?????????????+???????????	0.0116	0.0209
34581	rs10107589	a	t	100184	-1.197	0.2313	-	-+-+-------+--+-----+---+	-0.0055	0.0051
34582	rs10107590	a	g	93913	0.752	0.4522	+	?+-++--+--++---+-++-++-??	0.0122	0.0143
34583	rs10107597	a	c	100184	-0.933	0.3509	-	-++-+----++----+-+-++++-+	-0.0066	0.0085
34584	rs10107598	a	t	100184	-0.516	0.6056	-	+++--+---+-++-+----++--++	-0.0058	0.0075
34585	rs1010760	t	c	97063	-1.6	0.1097	-	++++--+-----+--?--++--+-+	-0.0151	0.0084
34586	rs10107605	a	c	100150	1.173	0.241	+	+----+---++++--++-+++++--	0.0071	0.0076
34587	rs10107611	t	g	100184	0.53	0.5959	+	--+-+---+--++++-++-+-++-+	0.0037	0.0058
34588	rs10107614	a	g	100184	-1.077	0.2816	-	---+++----+-++---++-+++++	-0.0054	0.006
34589	rs10107617	a	g	99463	-0.296	0.7674	-	-++----+---+-++--++--+--+	4e-04	0.0139
34590	rs10107623	a	c	94326	0.537	0.5913	+	+-++-+-+----+++++++----++	-0.0039	0.014
34591	rs10107626	a	t	95123	1.336	0.1815	+	+++-++++----++??--++-++++	0.0193	0.0166
34592	rs10107630	t	c	100184	0.441	0.6595	+	+---+-------+++++-+--+-++	0.0017	0.0051
34593	rs10107633	a	g	92879	0.488	0.6253	+	--+++-++---+++-?+-?+-+-++	0.0022	0.0075
34594	rs1010764	a	c	100154	-1.825	0.06795	-	--+++-----+----+-++----++	-0.0089	0.0051
34595	rs10107643	a	c	100184	0.366	0.7145	+	-+++-+-+----++++---++---+	0.0026	0.006
34596	rs10107646	a	t	97699	1.317	0.1877	+	?++-+-++--+++-+-++++++---	0.0074	0.0055
34597	rs10107647	a	g	7806	-0.023	0.9819	-	?????????????-???????????	-9e-04	0.0391
34598	rs10107651	c	g	100184	1.419	0.1558	+	+++---+-+-++-+----+++-+++	0.0065	0.0053
34599	rs10107652	t	c	100184	0.472	0.6371	+	---+--+-+--++--+++-+++-++	0.0025	0.0051
34600	rs10107655	t	g	7806	0.266	0.7905	+	?????????????+???????????	0.0109	0.0407
34601	rs10107657	t	c	100172	-1.06	0.2892	-	+-+--++--++-+---+-+++---+	-0.0086	0.0064
34602	rs10107658	a	g	100184	-0.479	0.632	-	--+-+-+---+++-+++----++++	-0.0027	0.0078
34603	rs10107660	t	c	100184	-0.833	0.4047	-	-+-++-++-++--+--++++-++--	-0.0038	0.0053
34604	rs10107664	t	c	100184	-1.302	0.1928	-	-----++-+++-+--+-+-+-+-+-	-0.0099	0.0083
34605	rs10107665	a	g	100045	0.443	0.658	+	+----++--+++-+-+--++++-+-	0.0011	0.0065
34606	rs10107666	t	c	100184	-0.229	0.8187	-	+--+++++-++-+-+-+++-+-+++	-0.0023	0.0051
34607	rs10107668	t	c	97140	2.388	0.01695	+	++-++--+++++-++-++++--+?-	0.0122	0.0052
34608	rs10107669	t	g	24956	1.358	0.1745	+	??-+?????????+????????-??	0.0891	0.0693
34609	rs1010767	t	c	100184	0.821	0.4115	+	++-+++-++++--++----+--+++	0.0088	0.0102
34610	rs10107670	a	g	100184	-0.672	0.5016	-	-++-+++++-+-+-+-++-+--+-+	-0.0031	0.009
34611	rs10107672	t	c	100184	-1.175	0.2401	-	+-------+++---+++--++-++-	-0.0066	0.0057
34612	rs10107680	a	g	100184	-1.641	0.1008	-	---+-----+-+--++++-+--+-+	-0.0099	0.0065
34613	rs10107681	a	t	100184	-0.117	0.9067	-	-++++----+--+-+---+--++--	-8e-04	0.0065
34614	rs10107684	t	c	100184	-1.259	0.2081	-	-+--+-+--+---++--+-+-++--	-0.0072	0.0069
34615	rs10107685	a	c	100184	-2.066	0.03883	-	+++--+--++++----+--+--++-	-0.0154	0.0072
34616	rs1010769	t	g	100137	-1.203	0.2291	-	+-----+-----++-+++++++---	-0.0083	0.0063
34617	rs10107690	t	c	100184	0.578	0.5636	+	+-++---+++---+++-+++---+-	0.0023	0.0051
34618	rs10107693	t	c	100184	-0.923	0.3561	-	-++-+-----+--+---+-++++-+	-0.0045	0.0053
34619	rs10107694	a	c	100184	-1.492	0.1358	-	-+----+-------+-+--++-++-	-0.01	0.0067
34620	rs10107695	a	g	100184	0.247	0.8052	+	+-+-+-++++-+------+-++---	6e-04	0.0084
34621	rs10107696	t	c	95047	-0.434	0.664	-	++-+--+----+-----++++-+--	-0.0052	0.0106
34622	rs10107697	a	c	100184	0.722	0.4703	+	+-+-+-++++-+-+----+-++---	0.0045	0.0082
34623	rs10107698	a	g	100180	-2.178	0.02937	-	+-+--+-+--+---+++-----+-+	-0.0145	0.0064
34624	rs10107699	t	c	100184	1.937	0.05277	+	-+-++-+--+++++-+++-+--+-+	0.0124	0.006
34625	rs10107700	c	g	100184	0.273	0.7851	+	-+++-++-+++---+-+++-+---+	0.0028	0.0051
34626	rs10107704	a	g	100184	-2.161	0.03073	-	+-+-+-------+---+-+--+-+-	-0.012	0.0051
34627	rs10107706	t	c	1940	-0.855	0.3928	-	??????????????-??????????	-0.04	0.0467
34628	rs10107707	t	c	100173	0.544	0.5861	+	-++--++-+---++++++-+++-+-	0.008	0.0151
34629	rs10107709	t	g	100184	1.769	0.07689	+	++-+----+++-+++-+++++--++	0.0086	0.0051
34630	rs1010771	c	g	100184	0.625	0.5321	+	+++----++++++++-+--+-+---	0.0032	0.0052
34631	rs10107710	t	c	100075	0.599	0.5491	+	++--+++-++++++--+--+-+--+	0.0035	0.0055
34632	rs10107713	a	g	100184	0.735	0.4625	+	-+--++-++-+--+++-++--+--+	0.0048	0.0051
34633	rs10107714	a	g	9746	0.485	0.6274	+	?????????????+-??????????	0.0111	0.0237
34634	rs10107716	t	c	100169	-0.552	0.5811	-	+++++-------++--++--++--+	-0.0032	0.0062
34635	rs10107719	t	c	100184	-0.334	0.7387	-	----+-+----+--++-++-+++-+	-0.0015	0.0052
34636	rs1010772	a	g	85795	1.462	0.1438	+	+-+-+-+???++++-+++?++---+	0.0078	0.0062
34637	rs10107720	t	c	58132	-1.442	0.1492	-	?-++-??----??--?---+?++-?	-0.0422	0.0286
34638	rs10107723	t	c	100184	0.954	0.3401	+	+--+++-+++--++++-+++++--+	0.0091	0.0112
34639	rs10107729	t	c	7806	-0.048	0.9618	-	?????????????-???????????	-9e-04	0.0189
34640	rs10107731	c	g	100184	2.023	0.04304	+	++-++--+--++++++-+-++-++-	0.0116	0.0064
34641	rs10107732	c	g	100071	-2.042	0.04112	-	-+----+-----+--+-+-++----	-0.0096	0.0051
34642	rs10107734	t	c	100184	-0.025	0.9804	-	+-+-++++--+---+---+-+-+++	-0.0014	0.0098
34643	rs10107739	a	g	100184	-1.311	0.19	-	-+--+-+-++--++--+-+------	-0.0111	0.0084
34644	rs10107740	a	c	100184	-0.369	0.712	-	-++-+---++----+++-++++++-	-6e-04	0.0077
34645	rs10107742	t	c	100184	-0.53	0.5963	-	+-+-++++-+----+-+---++-++	-0.0032	0.008
34646	rs10107743	c	g	89265	1.139	0.2548	+	--++++++-----+??+--+---++	0.022	0.0209
34647	rs10107746	t	c	96760	1.994	0.04613	+	-+-+-+++??++-+++-++++-+-+	0.0114	0.0052
34648	rs10107749	t	c	92295	0.879	0.3791	+	+?+++++++-+++--+++-+-----	0.0051	0.006
34649	rs10107751	a	t	58524	0.054	0.9568	+	+-???+?????+?-+-++??????+	0.0077	0.0239
34650	rs10107756	t	g	92433	1.638	0.1014	+	-+?+++--++++++??++++----+	0.0251	0.0131
34651	rs1010776	t	c	96941	0.596	0.5515	+	-+--++++-----+++--+-+++?-	0.0054	0.0068
34652	rs10107762	a	g	10252	0.5	0.6173	+	?????????????+??????-+???	0.0129	0.0248
34653	rs10107765	c	g	7806	-0.682	0.4949	-	?????????????-???????????	-0.0242	0.0354
34654	rs10107766	t	c	100184	-1.246	0.2128	-	---------+++---+------++-	-0.0071	0.0057
34655	rs10107769	t	c	100184	0.628	0.5298	+	+-+-+--+-+++++--+-++++--+	0.0016	0.0051
34656	rs1010777	a	g	100184	-1.142	0.2533	-	--+-+++--+-+--+----+-++--	-0.0054	0.005
34657	rs10107770	c	g	100184	-0.15	0.881	-	--++--++++-+--++---+-++-+	-0.001	0.0063
34658	rs10107771	c	g	98244	-1.358	0.1745	-	-+---++---+---?+++-+-----	-0.027	0.0195
34659	rs10107774	a	t	100184	1.099	0.2717	+	---+-++++--+++--++-+--+-+	0.0178	0.0141
34660	rs10107776	a	t	11655	0.283	0.7773	+	??????????+??-??????+-???	0.0045	0.0148
34661	rs10107777	t	c	100184	-1.506	0.1321	-	--+-++-++-+---+-----++-+-	-0.0072	0.0051
34662	rs10107783	a	g	7806	0.134	0.8934	+	?????????????+???????????	0.0065	0.0485
34663	rs10107785	t	g	100175	1.682	0.09266	+	+-++-+-+++++++++---+++-+-	0.0096	0.0062
34664	rs10107786	t	c	100184	-0.309	0.757	-	---+++-+--+-+-++--+-++--+	-0.0029	0.0088
34665	rs10107787	t	c	100184	-0.82	0.4124	-	+++-+++++--+---+--+-+--+-	-0.0048	0.0052
34666	rs1010779	t	g	100184	1.185	0.2359	+	+++-+++--+-+++--++--++-+-	0.0092	0.0067
34667	rs10107791	t	c	9746	-0.14	0.8885	-	?????????????--??????????	-0.0038	0.0253
34668	rs10107792	t	c	100184	1.363	0.1729	+	+-+--++++-++-++-++---+-+-	0.0062	0.0053
34669	rs10107799	a	g	100184	0.474	0.6354	+	++--+---++++-----+-+++-++	0.0013	0.0053
34670	rs10107806	t	g	100167	0.149	0.8816	+	---+--+-+--+-+--+----+-++	8e-04	0.0071
34671	rs1010781	t	c	100184	-0.108	0.9144	-	++++-+------+-+++-----+++	-0.0012	0.0053
34672	rs10107814	a	g	97148	-0.212	0.8317	-	+-+-+-++-+--+-+++--+-++?+	-0.001	0.0051
34673	rs10107816	t	c	100184	-0.213	0.8313	-	+-+-+-+++-+-+-++-+-+++-+-	-0.0036	0.0145
34674	rs10107820	a	g	7806	-0.512	0.6087	-	?????????????-???????????	-0.0177	0.0343
34675	rs1010783	t	c	100184	-0.115	0.9083	-	-+-----+-++-+++-+--+-++--	0.0017	0.006
34676	rs10107831	a	g	36641	0.472	0.6367	+	+??-??????+??+?-????--??+	0.0027	0.0089
34677	rs10107837	c	g	73931	-0.033	0.9735	-	-+----+++++--???--++-++++	1e-04	0.0081
34678	rs1010784	c	g	100184	0.655	0.5126	+	-++----+---+-----+++-++++	0.0033	0.0057
34679	rs10107840	t	c	100184	-0.637	0.5244	-	++++--+-++-++-----++-----	-0.0053	0.0074
34680	rs10107842	a	c	100184	0.013	0.9894	+	++-+-----+--+-++++--+----	-8e-04	0.0072
34681	rs10107847	a	g	100184	-1.131	0.2581	-	-----+--+-+--++-----+--++	-0.0049	0.0051
34682	rs10107848	a	g	100184	1.067	0.2861	+	+++-+-+++---++-++-+---+-+	0.006	0.0073
34683	rs10107849	a	g	2441	1.483	0.1381	+	????????????????????++???	0.0643	0.0429
34684	rs10107852	c	g	100037	0.288	0.7732	+	+--+-+---++++---++--+--++	9e-04	0.0061
34685	rs10107855	t	c	100184	0.397	0.6917	+	++-+++-+-+---+-+-+-+--++-	0.0014	0.0065
34686	rs10107857	t	c	91211	-0.489	0.6251	-	+----?----++-+?-?-+-++-??	-0.0125	0.0179
34687	rs1010786	a	g	97074	-0.233	0.8156	-	++-+---+--+---+-+--++-+?+	-0.0032	0.0075
34688	rs10107860	c	g	100184	0.681	0.4961	+	+++++---+-++++--+-++--+-+	0.0024	0.0053
34689	rs10107864	a	g	95123	2.008	0.04466	+	-+++---+-+++-+??+-+---+++	0.0266	0.0132
34690	rs10107867	t	c	90886	1.991	0.04647	+	+++--+++--++++??--?---+++	0.0266	0.0142
34691	rs10107869	a	c	100184	0.03	0.9763	+	+---+++++++-+-+++------++	3e-04	0.0081
34692	rs10107875	t	c	100184	-0.572	0.5676	-	++----+++++------+-+--+++	-0.0031	0.0054
34693	rs10107876	c	g	100184	0.143	0.8862	+	--++--++-++-++-+----+++-+	0.0021	0.0052
34694	rs1010788	c	g	100109	-1.624	0.1044	-	-+++++--+---+-+-----+-+0-	-0.0088	0.0058
34695	rs10107880	t	c	100184	-0.909	0.3636	-	+++-+++++--+---+--+-+--+-	-0.0053	0.0052
34696	rs10107881	a	g	1405	0.349	0.7271	+	??+??????????????????????	0.085	0.2424
34697	rs10107890	t	g	100184	0.705	0.4811	+	+++-++-++++++-+++----+-+-	0.0065	0.0087
34698	rs10107891	t	c	100156	-1.297	0.1946	-	-+--++---++----+--+-++---	-0.0107	0.0086
34699	rs10107897	a	t	97148	-1.316	0.1881	-	-+--+-+++++----++-+-+--?+	-0.0086	0.0068
34700	rs10107898	t	c	7806	-1.401	0.1612	-	?????????????-???????????	-0.0259	0.0184
34701	rs1010790	a	t	100184	-1.204	0.2287	-	--+++-------+-++-+--++---	-0.0067	0.0059
34702	rs10107905	t	g	100184	-0.208	0.8355	-	-+---+-+++-++++-----++---	9e-04	0.0064
34703	rs1010791	a	g	100184	-1.165	0.2439	-	--+++-------+-++-+--++--+	-0.0065	0.0059
34704	rs10107912	t	c	97148	-0.621	0.5348	-	+------+++-++-++++-+-++?+	-0.0025	0.0051
34705	rs10107913	t	c	97091	0.108	0.914	+	+-+-++-++++--+-+++-----?+	8e-04	0.0077
34706	rs10107914	a	c	100184	-0.408	0.6833	-	----+----+-+--++++++-++--	-0.0048	0.0088
34707	rs10107915	a	g	100184	0.635	0.5252	+	--+-++-+++--++-+-+++--++-	0.004	0.0058
34708	rs10107918	t	c	2377	-0.462	0.6439	-	????????????????????-+???	-0.0146	0.0319
34709	rs10107920	c	g	97699	1.049	0.2941	+	?++++-+----++++++-+-+-+--	0.0162	0.0178
34710	rs10107924	t	c	100184	-0.626	0.531	-	-+--+++--++++-++++----+--	-0.0024	0.0074
34711	rs10107926	t	c	100184	-0.265	0.7913	-	-++--++++++----++--+-++--	-0.0013	0.01
34712	rs10107927	t	c	100184	-0.196	0.8447	-	-+--+----++----+-+++-+---	-0.0011	0.0081
34713	rs10107928	a	g	97063	0.066	0.9471	+	+--++--+-+-+---?--+---+-+	0.0023	0.0163
34714	rs10107929	t	g	100184	0.549	0.5831	+	-+---+-+-+-+++--+++++-+--	0.012	0.0148
34715	rs10107930	a	g	91915	-0.934	0.3505	-	?--++--+----++??---+---+-	-0.0186	0.0201
34716	rs10107932	a	t	100184	-0.571	0.5683	-	+-----+-+----+---+++-++--	-0.0047	0.0057
34717	rs10107937	a	g	97063	0.012	0.9906	+	+--++--+-+-+---?--+---+-+	0.0015	0.0163
34718	rs10107938	a	g	100184	1.987	0.04688	+	++++++++-+-+-+++-+-++--++	0.017	0.0095
34719	rs1010794	t	c	100137	0.691	0.4895	+	++-+-+--++-----+--+-+-+++	0.0023	0.0051
34720	rs10107943	a	g	100184	0.868	0.3854	+	-++-+-++++-+++++--+-+++-+	0.0059	0.0054
34721	rs10107948	t	c	100172	0.356	0.7222	+	-+--------+++-+++--+++++-	0.0031	0.0052
34722	rs10107949	t	c	68444	-0.192	0.848	-	--++---++++?-+??+-?-+---+	0.0022	0.0257
34723	rs1010795	a	g	100184	0.887	0.3753	+	--+++-+--+++---+++++++--+	0.0099	0.0113
34724	rs10107953	t	c	6970	-0.286	0.775	-	????-?+???????????????++?	-0.0687	0.1003
34725	rs10107962	t	g	100184	-2.175	0.02961	-	+-+-+-------+---+-+--+-+-	-0.0121	0.0051
34726	rs10107968	c	g	100184	0.75	0.4532	+	-++--++-+-++++----+++---+	0.0074	0.0086
34727	rs1010797	a	c	98656	-0.24	0.8102	-	+--+-+---+-+---++++++-+++	-0.0024	0.0058
34728	rs10107976	t	c	100047	1.294	0.1958	+	--+--+-++++-+++++-+++++++	0.0106	0.0075
34729	rs10107977	c	g	100184	0.346	0.7296	+	---++---++++-++-+-++++++-	0.0022	0.0053
34730	rs1010798	t	c	98656	-0.16	0.873	-	---+-+--++-+---+-++++-+++	-0.0018	0.0063
34731	rs10107982	t	c	100184	1.361	0.1735	+	-+-+-----+---+-++++++----	0.0081	0.0059
34732	rs10107986	a	t	100184	1.053	0.2921	+	++-+---++-----++++++--++-	0.0059	0.0057
34733	rs10107987	a	t	100184	-0.8	0.4235	-	-++-----+-+-+++-++----+++	-0.0035	0.006
34734	rs10107992	a	g	100184	0.801	0.4232	+	---++--+-+++++++++----+++	0.0055	0.0052
34735	rs10107995	a	c	100184	1.412	0.1578	+	++--+++----++-++-+----+-+	0.0075	0.0054
34736	rs10107996	a	g	100184	1.464	0.1433	+	+++++-+++-+-++-++--+--+--	0.0135	0.0097
34737	rs10107997	t	c	99434	-0.1	0.9203	-	----+--+---++--+--+++---?	-7e-04	0.0051
34738	rs10107998	t	c	100156	-0.039	0.9685	-	+-+-+-++-+-++-+-+-++-+---	-0.0012	0.0074
34739	rs10107999	t	c	59705	-1.37	0.1708	-	?-???+?????-?-??+-?+++??+	-0.0352	0.0282
34740	rs10108	t	c	100184	-1.65	0.09886	-	----+-+-+----+++--++++---	-0.0097	0.0061
34741	rs1010800	t	c	98656	0.375	0.7078	+	--+-+-+--+-+-++-----+--++	0.0038	0.0061
34742	rs10108000	c	g	100184	0.61	0.5422	+	------+++----++++++++-+--	0.0055	0.0094
34743	rs10108001	t	g	100184	1.311	0.1899	+	+++++-+++-+-++-++--+--+--	0.0122	0.0097
34744	rs10108002	t	c	100184	-0.474	0.6352	-	+-++---++---+--+--++-++--	-0.0037	0.0057
34745	rs10108005	a	g	100184	1.027	0.3045	+	-+--+-++---+--+++--+--+++	0.0062	0.0058
[truncated: 1,249 more rows]

## Sheet: TG
	V1	V2	V3	V4	V5	V6	V7	V8	V9	V10
[truncated: 2,000 more rows]
